# Reactivation of transposable elements following hybridization in fission yeast

Sergio Tusso<sup>1,\*</sup>, Fang Suo<sup>2</sup>, Yue Liang<sup>2</sup>, Li-Lin Du<sup>2,3</sup>, and Jochen B.W. Wolf<sup>1,\*</sup>

<sup>1</sup> Division of Evolutionary Biology, Faculty of Biology, LMU Munich, Planegg-Martinsried, Germany

<sup>2</sup> National Institute of Biological Sciences, Beijing, 102206, China

<sup>3</sup> Tsinghua Institute of Multidisciplinary Biomedical Research, Tsinghua University, Beijing, 102206, China

\*authors to whom correspondence should be addressed

## Corresponding authors:

Sergio Tusso: [situssog@gmail.com](mailto:situssog@gmail.com)

Jochen B. W. Wolf: [j.wolf@biologie.uni-muenchen.de](mailto:j.wolf@biologie.uni-muenchen.de)

**Running title:** Reactivation of transposable elements in fission yeast

**Keywords:** Hybridization, Transposable Elements, Reactivation, Genomic Shock, Fission Yeast

## Abstract

Hybridization is thought to reactivate transposable elements (TEs) that were efficiently suppressed in the genomes of the parental hosts. Here, we provide evidence for this ‘genomic shock hypothesis’ in the fission yeast *Schizosaccharomyces pombe*. The species is characterized by divergence of two ancestral lineages (*Sp* and *Sk*) which have experienced recent, likely human induced, hybridization. We used long-read sequencing data to assemble genomes of 37 samples derived from 31 *S. pombe* strains spanning a wide range of ancestral admixture proportions. A comprehensive TE inventory revealed exclusive presence of long terminal repeat (LTR) retrotransposons. In-depth sequence analyses of active full-length elements, as well as solo-LTRs, revealed a complex history of homologous recombination. Population genetic analyses of syntenic sequences placed insertion of many solo-LTRs prior to the split of the *Sp* and *Sk* lineages. Most full-length elements were inserted more recently after hybridization. With the exception of a single full-length element with signs of positive selection, both solo-LTRs, and in particular, full-length elements carried signatures of purifying selection indicating effective removal by the host. Consistent with reactivation upon hybridization, the number of full-length LTR retrotransposons, varying extensively from zero to 87 among strains, significantly increased with the degree of genomic admixture. This study provides a detailed account of global TE diversity in *S. pombe*, documents complex recombination histories within TE elements and provides first evidence for the ‘genomic shock hypothesis’ in fungi with implications for the role of TEs in adaptation and speciation.

## Introduction

Hybridization is a pervasive evolutionary force with implications for adaptation and species diversification (Abbott et al. 2013). Depending on the interactions between migration, selection and recombination, hybridization can result in equal admixture proportions of both parental lineages, dominance of variants from the more abundant or locally adapted parental lineage, or introgression of single adaptive loci (Dowling and Secor 1997; Matute et al. 2019; Taylor and Hebert 1993; The Heliconius Genome Consortium et al. 2012). The consequences of hybridization for genomic composition, phenotypic variation and organismal fitness are

accordingly diverse (Barton 2001). Disruption and novel arrangement of parental haplotypes, however, are essential upshots of hybridization and have the potential to significantly alter regulatory pathways (Turner et al. 2014). This includes regulation and epigenetic control of transposable elements (TEs) (Han et al. 2004) with proven consequences for speciation (Serrato-Capuchina and Matute 2018) and genome evolution (Kazazian 2004). Barbara McClintock hypothesized that hybridization could lead to a significant “genomic shock” reactivating the mobilization of TEs that were efficiently suppressed in the parental genomes (McClintock 1984). This hypothesis follows from the idea of a co-evolutionary arms race (Van Valen 1973) between TEs striving to maximize proliferation and the host genome evolving suppression mechanisms to keep TE activity in check. By introducing novel TEs into a naïve genomic background, hybridization has the potential to disrupt genome stability with the possible effect of reactivating TE transcription and transposition (McClintock 1984).

Evidence for the ‘genomic shock hypothesis’ is scarce, despite investigation in a diverse array of species across the tree of life. Results are often mixed, and outcomes differ even between closely related species. For example, intraspecific crosses between *Drosophila melanogaster* males containing the P-element transposon with naïve females lacking expression of the suppressor gene result in hybrid dysgenesis (Kidwell et al. 1977; Bingham et al. 1982; Kidwell 1983; Bucheton et al. 1984). In other species of *Drosophila*, however, this effect cannot be consistently replicated (Coyne 1985; Hey 1988; Lozovskaya et al. 1990; Vela et al. 2014). Hybridization between *Arabidopsis thaliana* and *A. arenosa* induces up-regulation of ATHILA retrotransposons and reduces hybrid viability (Josefsson et al. 2006). However, such an effect is not observed in crosses between *A. thaliana* and *A. lyrata* (Göbel et al. 2018). In sunflowers, contemporary crosses between *Helianthus annuus* and *H. petiolaris* show no evidence for large-scale TE reactivation (Kawakami et al. 2011; Ungerer

and Kawakami 2013; Renaut et al. 2014). Yet, over evolutionary timescales, sunflower hybrid species combining ancestry from the same parental species show an elevated number of LTR retrotransposons, indicating a role of hybridization for TE release in the past (Ungerer et al. 2006; Staton et al. 2009; Ungerer et al. 2009). Direct evidence for TE reactivation was observed from a 232-fold increase in TE activity in hybrids of incipient whitefish species (Dion-Côté et al. 2014). In other major groups like fungi, relatively little attention has been paid to study TE reactivation in the course of hybridization. In two recent published studies carried out in *Saccharomyces* species, no evidence supporting the genomic shock hypothesis was found (Hénault et al. 2020; Smukowski Heil et al. 2020).

Detailed investigation of the ‘genomic shock hypothesis’ has long been hampered by technical difficulties of accurate TE characterization limiting studies for the most part to comparative genomics between high quality assemblies of few, evolutionary divergent species (Hoban et al. 2016; Villanueva-Cañas et al. 2017; Bourgeois and Boissinot 2019). Long-read technology significantly simplifies *de-novo* assembly and accordingly opens the opportunity to characterize TE variation at the resolution of multiple individual genomes, even from the same species. We here make use of this opportunity to study the ‘genomic shock hypothesis’ at microevolutionary resolution in a suitable model system, the fission yeast *Schizosaccharomyces pombe*. *S. pombe* belongs to the Taphrinomycotina subphylum of the Ascomycota. It is a world-wide distributed, haploid, unicellular fungus with facultative sexual reproduction (Jeffares 2018). Recent population genetic studies have shown that all known strains arose by recent admixture between two divergent, ancestral lineages (described as *Sk* and *Sp*) (Tao et al. 2019; Tusso et al. 2019). These two lineages most likely diverged in Europe (*Sp*) and Asia (*Sk*) since the last glacial period. Human induced migration at the onset of intensified transcontinental trade likely induced hybridization of these ancestral lineages

~20–60 sexual outcrossing generations ago. Hybridization resulted in a broad range of ancestral admixture proportions predicting levels of phenotypic variation and reproductive compatibility between strains (Tusso et al. 2019). Haplotype reconstruction revealed that the reference laboratory strain 972  $h^-$  is of pure *Sp* ancestry.

To date, a detailed TE inventory has only been conducted for a single *S. pombe* strain, the strain 972  $h^-$ , which has been used for the assembly of the reference genome (Wood et al. 2002; Bowen 2003). TEs found in the reference genome are all retrotransposons (class I TEs) with long terminal repeats (LTRs), which can be grouped into several LTR families ( $\square\square\square$ ) on the basis of phylogenetic analyses (Bowen 2003). The vast majority of TE elements in the reference genome only occurs in the form of solo-LTRs (174 out of 187 TE elements). Merely two types of full-length retrotransposons, called Tf1 and Tf2, containing the internal coding region (hereafter referred to as full-length elements) are known to exist in *S. pombe* (Levin et al. 1990; Levin 1995). Both Tf1 and Tf2 belong to the Ty3/Gypsy type of LTR retrotransposons, and their LTRs belong to the  $\square$  and  $\square$  family, respectively. In the reference genome, full-length elements (13 of 187 TE elements) are all Tf2 elements (Esnault and Levin 2015), but full-length Tf1 elements are known to exist in several wild strains (Levin et al. 1990). Short-read genome sequencing data have been used to investigate variation of TE insertions in *S. pombe* (Jeffares et al. 2015), but exact TE sequences cannot be reliably inferred from short reads.

In this study, we present a comprehensive description of the TE repertoire of fission yeast and place it in the context of recent hybridization between the *Sp* and *Sk* ancestors. Using long-read sequencing data, we generated *de novo* assemblies for 37 samples from 31 non-clonal strains spanning the world-wide diversity of the species and reflecting a broad range of

admixture proportions. Sequence comparison and phylogenetic analyses of individually annotated TEs reveal extensive variation in the number and genomic location of both solo-LTRs and full-length elements between strains. Detailed phylogenetic and population genetic analyses further sheds light on TE selection dynamics, provides evidence for complex recombination, and lends support to the genomic shock hypothesis.

## Results

A previous large-scale analysis of global genetic diversity of *S. pombe* using 161 strains (JB strains) has identified 57 clades differing by at least 1,900 SNPs (Jeffares et al. 2015). We generated long-read data from a subset of 37 samples representing 29 of the 57 clades, and two additional, previously undescribed strains (**Figure 1, Supplementary figure 1, Supplementary table 1**). In six instances, two clones of the same strain accessed from different labs (with potentially different recent storage and growing history) were independently sequenced. The data set was further complemented with the reference genome. Analyses of SNP variation place these 38 samples well within the global continuum of *Sp* to *Sk* ancestry (Tusso et al. 2019) (**Figure 1a,b and Supplementary figure 1**). Highly consistent ancestry profiles between clones of the same strain reflect high technical replicability (**Supplementary figure 1 and Supplementary figure 2**).

### *Global TE diversity of S. pombe*

From long-read data averaging 85x sequence coverage per sample (range: 40x-140x), we generated 37 individual (near-)chromosome genome assemblies (**Supplementary table 3**). Subsequent annotation allowed for characterization of TE repertoires for each individual assembly. To establish synteny of TEs between the often highly rearranged genomes (Brown et al. 2011; Tusso et al. 2019), we translated the coordinates of TEs in each individual

assembly to those in the reference genome. Locations of TE elements were highly collinear between samples (**Supplementary figure 3**) and often hosted multiple copies of TEs (as many as 8 copies). We refer to these local TE aggregations as TE clusters throughout. Within a cluster, synteny could not be unequivocally defined, restricting several subsequent analyses to TE clusters, rather than individual TE sequences.

Across all samples we identified 8,546 TE sequences that were contained in 656 TE clusters. Consistent with previous work, all TE sequences belonged to the Ty3/Gypsy LTR retrotransposon superfamily (Levin 1995; Levin et al. 1990). The vast majority of TE sequences occurred as solo-LTRs, and only 1,160 TE sequences were longer than 1.5 kb and contained internal sequences. The vast majority of the long sequences (> 86%) had a length of around 4.9 kb, the expected length of full-length Tf1 or Tf2 elements (**Figure 1c**, **Supplementary figure 4**). In the subsequent analyses, we refer to all elements > 1.5 kb as full-length elements. However, restriction of the analyses to 4.9 kb-long elements yielded qualitatively the same results. The number of TE elements varied substantially between strains both for solo-LTR sequences (range 160-236), as well as for full-length elements (range: 0 (DY39827) - 87 (JB943\_DY44517), **Figure 1c**, **Supplementary figure 5**).





*de novo* genomes derived from the same strain (IDs: JB22\_EBC2 and JB22) revealed a number of differences. In Pomberef, we identified a total of 189 clusters, containing 236 TE sequences. In contrast, in JB22\_EBC2 and JB22\_DY38751, we scored 185 and 175 clusters with 235 and 215 TE sequences, respectively. While all 185 clusters from JB22\_EBC2 were shared with Pomberef, two clusters, each containing a single TE sequence, were specific to JB22. Some differences corresponded to new sequence insertions present only in either JB22\_EBC2 or JB22, or conversion from full-length elements to solo-LTRs. This suggests that at least a fraction of these differences is not owing to genome quality differences, but may reflect biological variation acquired during a short period of time. Similarly, small levels of variation were observed between other clonal samples (**Supplementary figure 6**).

The overall high consistency of TE sequences in our clonal *de novo* genomes contrasted with low congruence with TE inference from other sources (**Supplementary figure 7**). A comparison between our annotation of TE sequences in the reference genome and a BLAST-based annotation of TE sequences in an earlier version of the reference genome reported by Bowen *et al.* (2003) (**Supplementary table 6**) showed consistency in 142 identified clusters. 56 and 34 clusters showed unique evidence in either our Pomberef annotation or Bowen's annotation. Comparison between our annotation of *de novo* genomes and inference of the same strains based on short-read data revealed even more striking discrepancies. Comparing presence/absence of TE clusters as inferred from short-read data by (Jeffares et al. 2015) (**Supplementary table 7**) to our annotations revealed a large proportion of inconsistent clusters ranging from 24% (JB22) to 50% (JB874). In summary, these results highlight the limitation of short-read data to infer TE insertions, confirm the robustness of long-read based inference and tentatively suggest rapid mutation in nominally clonal strains.

# *LTR diversity is superimposed on ancestral population divergence*

Next, we extracted all solo-LTRs and flanking LTR sequences from full-length elements (both 5' and 3') amounting to 9,422 LTR sequences altogether. Phylogenetic analysis of the resulting sequence alignment provided an overview of the global diversity of LTR sequences in *S. pombe* (**Figure 2a**). Although bootstrap support was generally low and support was primarily restricted to terminal branches, LTR sequences could be broadly grouped into previously reported families (Bowen 2003). In most families, LTRs occurred exclusively as solo-LTRs, had long terminal branches and showed high intra-family diversity. This phylogenetic signature reflects past infections of now extinct elements and is consistent with a long history of recombination-mediated conversion of full-length elements into solo-LTRs followed by pseudogenization of the remaining LTR sequences. The  $\alpha$  and  $\beta$  families constitute an exception. These two families hosted the large majority of full-length elements found in the data set, Tf1 and Tf2, respectively (**Figure 2b**). The other group of LTR sequences associated with full-length elements, here coined *Sub- $\alpha$* , was closely related to the  $\alpha$  family, but showed evidence for extensive recombination between LTR haplotypes from the  $\alpha$  and  $\beta$  families, or between the  $\beta$  family and an ancestral sequence related to the  $\zeta$  family (**Supplementary figure 8**). In total, we identified at least 24 recombinant LTR haplotypes, several of which were found in multiple clusters (up to 64 and 40 clusters for the two most common haplotypes) (**Supplementary figure 9**).

To relate the diversity of LTR sequences to global species diversity (*Sp* vs. *Sk* lineage) we inferred the ancestral genomic background of each syntenic cluster for each strain. In 569 of all 599 syntenic clusters, LTR sequences from the same family were exclusively present in clusters from either of the two ancestral backgrounds. Consistent with higher overall genetic diversity in the *Sk* lineage (Tusso et al. 2019), the percentage of clusters with lineage-specific

presence of an LTR family was higher for the *Sk* than for the *Sp* background (57% and 38% respectively). In 175 clusters, sequences originating from the same LTR family occurred in at least one sample of each ancestral background, in 159 in at least two. Co-occurrence across ancestral backgrounds makes these sequences prime candidates of ancestral insertions prior to divergence of the two lineages. Across all 159 syntenic clusters, mean pairwise divergence was lower between sequences from the same LTR family inserted into the same ancestral background (*Sp-Sp* and *Sk-Sk*) than for the comparison between different ancestral backgrounds (*Sp-Sk*) (**Figure 2c** and **Supplementary figure 10**). Moreover, mean pairwise distance within the *Sk* group was higher than for the *Sp* group, which is again consistent with higher effective population size previously inferred for the *Sk* group (Tusso et al. 2019). In summary, these results from solo-LTR sequences are consistent with the two-clade history inferred from genome wide SNPs (Tao et al. 2019; Tusso et al. 2019) and show that a non-negligible proportion of solo-LTRs preceded *Sp* and *Sk* divergence and/or subsequent hybridization. This includes LTR sequences from the two most common  $\alpha$  and  $\beta$  families characterizing full-length elements (**Supplementary figure 11**).

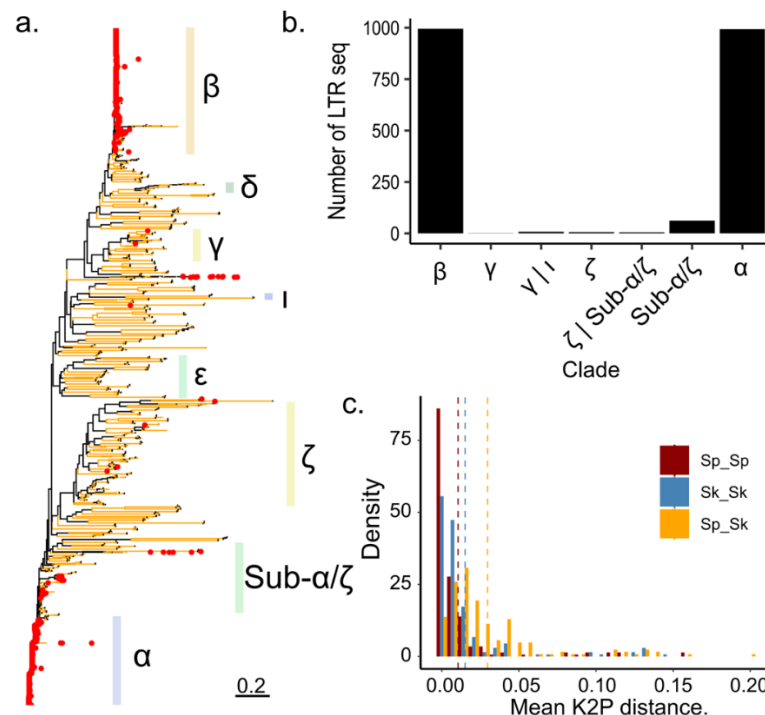

**Figure 2. Phylogenetic relationship between LTR sequences.** **a.** Maximum likelihood unrooted tree for solo-LTRs and LTRs flanking full-length elements. Branches with bootstrap support higher than 95 are shown in yellow. LTR sequences associated with full-length elements are indicated with red points. Nomenclature of families follows Bowen et al. (2003) (see methods). **b.** Number of flanking LTRs from full-length elements grouped by LTR family. Sequences without clear family membership, are classified by the two most closely related families. **c.** Pairwise divergence of LTR sequences belonging to the same family within syntenic clusters. Divergence between sequences is grouped by ancestral background: within ancestral background (*Sp* vs. *Sp* or *Sk* vs. *Sk*) or between ancestral backgrounds (*Sp* vs. *Sk*). Mean divergence per group is indicated by hashed, vertical lines.

# *Haplotype diversity of full-length elements documents a history of recombination*

Next, we focused on full-length elements for which two haplotypes, Tf1 and Tf2 elements, have been previously described in *S. pombe*. Using window-based haplotype painting, all sequences were collapsed into 11 discrete haplotypes, each present in at least 5 sequences (see Methods, **Figure 3a**). These haplotypes can similarly be identified by means of phylogenetic analyses (**Figure 3b**). Differentiation between haplotypes was primarily due to divergence in the flanking LTR sequences and in the first ~2 kb of the internal sequence, which are also regions where major differences between Tf1 and Tf2 haplotypes occur.

Prevalence in the data set was highest for the typical Tf1 and Tf2 haplotypes occurring in 207 and 203 clusters, respectively. The remaining 9 haplotypes populated 69 clusters. Despite relatively lower numbers, paralogous occurrence across different genomic regions (clusters) suggests that some of these recombinant haplotypes have recently been active. Prominent examples are haplotypes Tf2d, Tf2f and Tf2g found in 11, 9 and 28 independent clusters, respectively.

Haplotype diversity was larger for derivatives from Tf2 (9 haplotypes) than for Tf1 with only one additional haplotype. Haplotype diversity was mostly not due to novel mutations, but was mainly governed by homologous recombination between the Tf1 and Tf2 haplotypes. For example, haplotype Tf1a contains an internal sequence of the Tf1 haplotype, but flanking LTRs are more similar to those of Tf2 ( $\beta$  LTR family). Conversely, haplotype Tf2e is most similar to Tf2 in the internal sequence, but its flanking LTRs are more related to those found in Tf1 ( $\alpha$  LTR family). Other haplotypes also suggest recombination of the internal sequence, as is illustrated in Tf2f.

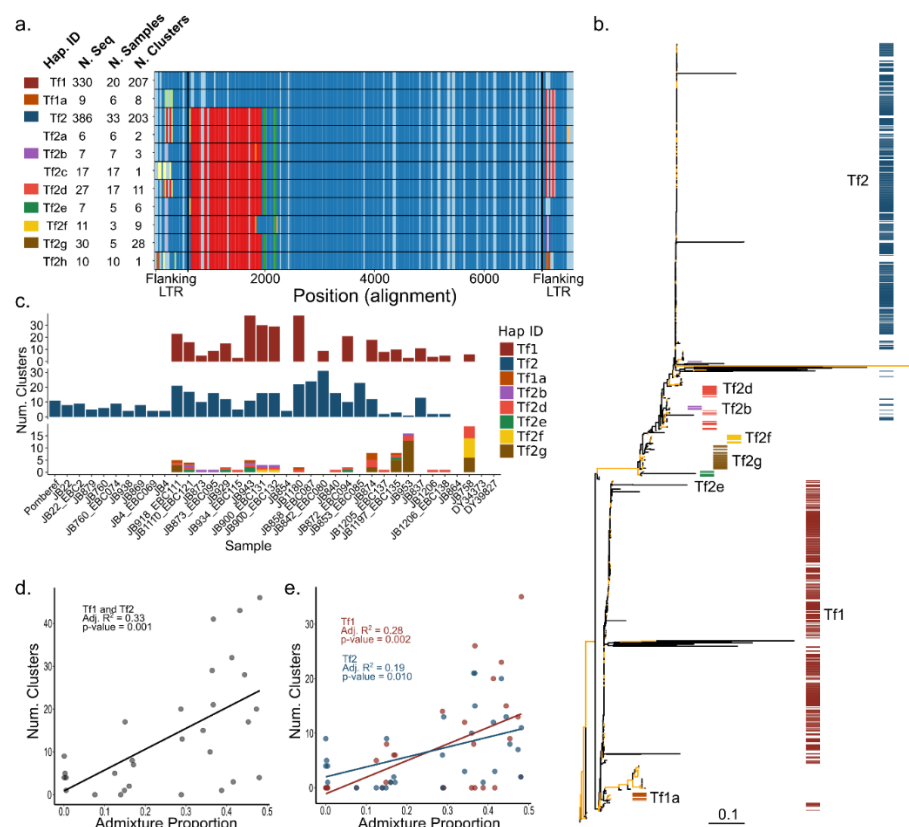

**Figure 3. Diversity of full-length LTR elements.** **a.** Alignment of the 11 haplotypes identified by window-based haplotype painting in a global sample of *S. pombe*. For each haplotype we show: haplotype ID, number of sequences found in all samples, number of samples, and number of independent clusters. Vertical black lines show boundaries of flanking LTRs. Colours per window (vertical comparison within the alignment) represent haplotype difference from Tf1 used as reference. **b.** Maximum likelihood un-rooted tree for full-length LTRs. Branches with bootstrap support higher than 95 are shown in yellow. Colours correspond to the colour assignment of the eight most common haplotypes in panel a. **c.** Number of common haplotypes for full-length elements found in at least 3 independent clusters shown per sample (lower panel). Haplotypes Tf1 and Tf2 are shown in independent plots (upper, middle panel). Colours per haplotype ID as indicated. Samples are ordered by ancestral admixture from pure *Sp* to pure *Sk* as in **Figure 1**. **d.** Relationship between ancestral *Sp* and *Sk* admixture proportions and the number of clusters with Tf1 and Tf2 full-length elements. Each point represents a non-clonal strain. The adjusted proportion of total variance explained ( $R^2$ ) and the type 1 error probability (p-value) are shown as inset. **e.** As panel d, but differentiating between haplotypes Tf1 and Tf2.

### Support for the genomic shock hypothesis

To estimate the age of insertion, we calculated pairwise divergence between the 5' and 3' flanking LTR sequence for each full-length element. Naturally, divergence between 5' and 3' LTRs in recombinant full-length elements was elevated with values exceeding 10 %

(**Supplementary figure 12**). For the vast majority of non-recombinant full-length elements of both Tf1 and Tf2, however, divergence was lower than 1%, consistent with recent activity. Recent activity succeeding the *Sp* and *Sk* split was further supported by an uneven segregation of full-length haplotypes between ancestral backgrounds: the Tf2 haplotype was found in the majority of samples, but was absent in strains with predominant *Sk* ancestry. The Tf1 haplotype showed the reverse pattern (**Figure 3c**). Other haplotypes were either sample specific or were restricted to a few samples, with JB758 and JB953 being exceptionally prolific hosts of the non-typical, full-length haplotypes. Haplotypes whose prevalence was restricted to only a few samples often showed high abundance within those samples. For instance, Tf2f and Tf2g were restricted to 3 and 5 samples, but populated 9 and 28 clusters, respectively. This analysis suggests that full-length haplotypes can be grouped into two classes. i) Two common haplotypes (Tf1 and Tf2) which are characterized by flanking LTRs of the □□ and □ family and are found in most samples, but segregate at different rates in the ancestral groups (with dominance of Tf2 in *Sp* and dominance of Tf1 in *Sk*). Analysis of solo LTRs suggest likely presence of at least the □ family prior to the split of *Sp* and *Sk* (**Supplementary figure 11**). ii) A number of haplotypes restricted to few strains, often with evidence for recombination. Based on sequence similarity, at least some of these rarer haplotypes originated by homologous recombination between Tf1 and Tf2 and remained active thereafter.

We next examined whether the patterns of TE diversity in *S. pombe* conform to the prediction of the ‘genomic shock hypothesis’. If recent hybridization (~20-60 sexual generations ago, Tusso et al. 2019) reactivated TE activity, strains with admixed genomic backgrounds should, on average, host a larger number of full-length elements. This prediction was supported by the data. We observed a significant positive relationship between ancestral admixture

proportion and the number of clusters containing full-length Tf1 or Tf2 sequences (p-value 0.001, adj.  $R^2$ : 0.33 including only non-clonal samples; **Figure 3d**). This correlation remained if each haplotype was considered independently (p-value 0.002 and 0.010 and adj.  $R^2$  0.28 and 0.19 for Tf1 and Tf2 respectively; **Figure 3e**), and when exclusively focusing on the most recent full-length element insertions (singleton clusters; p-value 0.024, adj.  $R^2$ : 0.14; **Supplementary figure 13**). This correlation is consistent with increased TE activity in admixed samples. Alternatively, it may reflect a demographic signal of an increased population mutation rate in a pool of hybrids having recently experienced a population expansion. However, repeating the analysis using neutrally evolving SNPs did not support a differential demographic explanation (**Supplementary figure 13**). On the basis of these results, we propose that recent hybridization increased the rate of TE proliferation in *S. pombe*, as is predicted by the ‘genomic shock hypothesis’.

#### *Population genetic inference of selection*

To shed further light on the evolutionary history of TE elements in *S. pombe*, we constructed unfolded site-frequency spectra (SFS) scoring presence/absence of clusters as allelic states. Presence of a cluster naturally represents the derived state. First, we considered all clusters found in non-clonal strains (635 in total). 442 clusters (69.6%) were found in no more than five samples, and 273 (42.9% of total) were restricted to single samples (singletons) (**Figure 4a**). 114 clusters (16.3%) occurred in 90% or more of the samples. These ubiquitously present clusters contained predominantly solo-LTRs. Restricting the consideration to full-length elements, low frequency variants were substantially more common and high frequency clusters were drastically reduced. Of 434 clusters with at least one full-length element, 423 (97.4%) were found in no more than five samples and 258 (59.4% of total) were singletons. Only one single full-length element-containing cluster exceeded a frequency of 90%.



The excess of low-frequency and depletion of high-frequency clusters containing full-length elements can result from three non-mutually exclusive processes: a recent burst in transposition rate, a recent demographic population expansion resulting in an increase of rare variants and purifying selection removing new insertions and maintaining variants in low frequency. To evaluate the effect of demographic variation, the history of admixture of the species has to be accounted for. We therefore scored variation of SNPs adjacent to each cluster and inferred the ancestral origin for each cluster ( $Sp$  or  $Sk$ ). Subsequently, we calculated the two-dimensional site frequency spectrum (2dSFS) for both  $Sp$  and  $Sk$  ancestry using only non-clonal samples (**Figure 4b**). Considering all TE elements (solo-LTR and full-length), ~15% of the clusters were fixed in both ancestral lineages likely representing ancestral insertions present prior to the split of the two lineages. The majority of clusters, however, were lineage-specific and in low frequency, with 43% of the clusters having frequencies below 0.1 in both lineages (~61% in folded SFS – **Supplementary figure 14**). For full-length elements, low frequency variants were even more common (**Figure 4c** and folded 2dSFS in **Supplementary figure 14**). Here, the percentage of low frequency variants increased to ~60% and clusters at intermediate frequency were significantly reduced. To relate these patterns to genetic variation presumably evolving neutrally, we constructed the folded 2dSFS of genome-wide non-coding SNPs (**Figure 4d**). Here, the percentage of low frequency variants for non-coding SNPs was ~30% which was clearly below values of the folded 2dSFS from all-LTR (60.9%) and full-length variants (60.6%) (**Supplementary figure 14**). The increase of rare alleles from neutral SNPs, over mainly solo-LTRs to full-length LTRs cannot be explained with demographic expansion alone. Instead, these results are best explained by a recent increase in TE proliferation (in admixed genomes, see above) and a likely additional component of purifying selection against LTRs in general. Consistent with the latter

prediction, the percentage of fixed clusters was higher in the *Sp* ancestral population where a lower  $N_e$ , reducing the efficacy of selection (Charlesworth and Charlesworth 1983; Charlesworth and Langley 1989), has been predicted (Tusso et al. 2019) (~4.8% and ~1.3% of clusters with frequency higher than 0.9 for *Sp* and *Sk*, respectively).

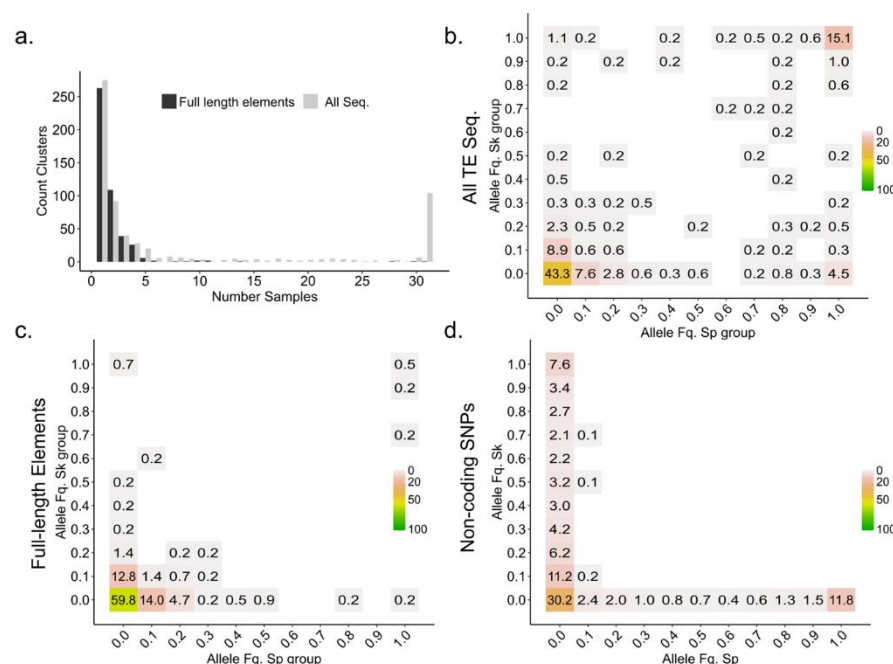

**Figure 4. Allelic variation of LTR clusters between non-clonal strains.** **a.** One-dimensional site frequency spectrum summarizing the allelic frequency of TE cluster insertions across all 31 non-clonal strains. Bars differentiate between either all sequences or full-length elements. **b,c,d.** Two-dimensional site frequency spectra showing the proportion of clusters shared between the ancestral *Sp* and *Sk* background for all TE sequences (**b**), full-length elements (**c**) and non-coding genome-wide SNPs (**d**). Note that site frequency spectra in **b** and **c** are unfolded, but folded in **d**. For folded spectra of **b** and **c** see **Supplementary Figure 14**. Number and colour range indicate the percentage out of all variants within each panel.

## Discussion

### *Support for the genomic shock hypothesis on a microevolutionary scale*

This study provides empirical evidence for a role of hybridization in the evolution of transposable elements. To our knowledge, this constitutes the first report of TE reactivation in fungi (Hénault et al. 2020; Smukowski Heil et al. 2020). Our results are consistent with the

idea that hybridization of two closely related *S. pombe* lineages, *Sp* and *Sk* ( $D_{xy} \sim 0.005$ ), activated TE proliferation in the admixed genomes ('genomic shock' (McClintock 1984). Hybridization occurred approximately 20-60 outcrossing sexual generations ago, possibly coinciding with increased transcontinental human trade several centuries ago (Tusso et al. 2019). The recent timing of hybridization allowed us to witness the sudden burst of transposition in natural populations, before signal loss by re-establishment of novel repression mechanisms. Sudden bursts of transposition generated a large cohort of insertions with roughly the same age as has similarly been documented in *Drosophila* (Vieira et al. 1999), rice (Piegu et al. 2006), piciformes (Manthey et al. 2018), salmonids (de Boer et al. 2007), and primates (Pace and Feschotte 2007).

We hypothesize, that hybridization may have contributed to increased numbers of full-length TEs in admixed genomes in three ways. First and foremost, by import of active, full-length elements from one pure parental background into the other. This was illustrated by transfer of Tf2 full-length elements from the *Sp* genomic background into the originally Tf2-free *Sk* background in admixed samples. Second, by disruption of the allelic inventory of co-adapted control mechanisms impeding TE mobilization in the parental backgrounds. While the precise molecular mechanisms underlying activity, repression and copy number of TEs have been extensively studied in the reference strain of *S. pombe* (Hansen et al. 2005; Cam et al. 2008; Lorenz et al. 2012; Murton et al. 2016), the exact mechanism underlying the observed reactivation of TEs in natural populations remains elusive and will require further study.

A third way of how hybridization may have contributed to TE proliferation is by reduction of  $N_e$  in the founder population of hybrids reducing efficiency of purifying selection against TE (Charlesworth 2009; Charlesworth and Charlesworth 1983). While a bottleneck as recent as

20 outcrossing generations ago is difficult to reconstruct, patterns of TE frequency overall confirmed the relationship between effective population size and purifying selection. Contrary to findings of other hybridizing yeast lineages, we found that putatively active full-length elements are only ubiquitously present in one of the pure parental backgrounds (*Sp*). Strains predominated by *Sk* ancestry had an overall reduced number of solo-LTRs, less fixed LTR insertions, and hosted few, if any, copies of full-length LTR elements (with only few, slightly admixed strains hosting Tf1). More efficient TE control and removal in the *Sk* lineage is consistent with its higher effective population size (Tusso et al. 2019) predicting higher efficiency of purifying selection of deleterious TE elements compared to *Sp* ancestral lineages (Lynch and Walsh 2007). Similar variation in TE content as a result of changes in *Ne* has been observed in *Brachypodium* (Stritt et al. 2018), *Arabidopsis* (Lockton et al. 2008), *Caenorhabditis* (Dolgin et al. 2008), *Drosophila* (García Guerreiro et al. 2008), sticklebacks (Blass et al. 2012), *Anoles* (Tollis and Boissinot 2013), humans and mice (Xue et al. 2018).

Transposition-selection balance was further reflected by site frequency spectra skewed towards low frequency of TE insertions (Barrón et al. 2014; Bourgeois and Boissinot 2019). Analysis in *Drosophila* found that 48 to 76% of TEs had frequencies lower than expected under neutrality as a consequence of purifying selection (Cridland et al. 2013; Barrón et al. 2014; Blumenstiel et al. 2014), with selection coefficients ranging between  $N_e s \approx -4$  and  $-100$  (González et al. 2009). Similarly, deviation from neutral expectations has been observed in other systems like *Anoles* (Ruggiero et al. 2017), mice (Xue et al. 2018), or *Arabidopsis* (Hazzouri et al. 2008; Lockton et al. 2008). In this study, we similarly found 60.4% (79.3% in folded 2dSFS) of TE insertion in frequencies below 0.2, contrasting with 44.1% found for presumably neutral, non-coding SNPs.

Overall, the data are best explained by a burst in transposition rate upon hybridization on a background of continuous purging of both solo-LTRs and to a larger degree for full-length elements. To quantify the contribution of purifying selection on TE expansion during and after hybridization explicit demographic reconstruction and fitness data would be necessary.

# *TE dynamics through time – the role of homologous recombination*

The combination of phylogenetic and population genetic analyses of this study further contributes to our understanding of TE dynamics in natural populations. Under expectations of the neutral evolutionary theory, younger TE insertions are on an average expected to segregate at lower allele frequencies than older insertions (Kimura and Ohta 1973). Moreover, under the assumption of a molecular clock, progressively older insertions will have accumulated increasingly more mutations (Petrov et al. 1996). Thus, both allele frequency and sequence divergence provide information on the age of TE insertions (Blumenstiel et al. 2014). Across our global sample of *S. pombe* strains, the vast majority of full-length LTR elements segregated at very low frequencies, and sequence divergence of flanking LTRs within and between copies was shallow. In contrast, solo-LTRs segregated at higher frequencies and were diversified into multiple, divergent families, often contained within one and the same syntenic genomic cluster. These results are consistent with full-length elements being mostly of young age and solo-LTRs being of much older origin. In the *S. pombe* reference strain, ~70% of Tf2 mobilization events involve homologous recombination between newly synthesized cDNA and a pre-existing copy of Tf2; the remaining ~30% of cases integrate in novel chromosomal locations (Hoff et al. 1998). Homologous recombination and recycling of target sites has two consequences for TE dynamics. First, older TE insertions may be replaced by more recent events, hampering the reconstruction of TE dynamics over long evolutionary time scales. Second, homologous

recombination can be an important mechanism for TE diversification, resulting in new recombinant haplotypes for which this study provides copious examples. Importantly, recombination has occurred between elements of divergent families (Tf1 and Tf2), generating chimeric elements that appear to be still active.

# *Adaptive evolution of TEs*

Transposable elements do not exclusively cause damage to the host. As sources of molecular variation, they can reroute regulation of gene expression (Sundaram and Wysocka 2020; Trizzino et al. 2017) and contribute to adaptive evolution (Schrader and Schmitz 2019). Environmental change can influence transposition rate as observed in *S. cerevisiae* (Paquin and Williamson 1984), or provide opportunities for positive selection of novel TE insertions (Aminetzach et al. 2005; Gresham et al. 2008; Hof et al. 2016; Esnault et al. 2019). Over long evolutionary time scales, beneficial TE insertions can become domesticated by the host genome (Miller et al. 1999). In *S. pombe*, for instance, CENP-B proteins involved in TE silencing (Cam et al. 2008) are believed to have evolved from a domesticated pogo-like DNA transposase (Irelan et al. 2001; Casola et al. 2008).

TE insertions in *S. pombe* have also been discussed in the context of adaptation to environmental disturbance, or stress response. TE expression has been shown to be induced under stress conditions (Chen et al. 2003; Sehgal et al. 2007), and an enhancer sequence contained in Tf1 induces expression in adjacent genes (Leem et al. 2008). Artificially induced Tf1 insertions in the reference strain preferentially occurred upstream of stress response genes (Guo and Levin 2010). In natural strains, TE insertions are also enriched in the proximity to promoters of gene for stress response (Jeffares et al. 2015), which has been interpreted as evidence for TE induced adaptive response (Esnault et al. 2019). Additionally,

analysis of experimental populations under different environments shows variation in the genomic distribution of Tf1 integrations, as well as increased transposition rates under stress conditions (Esnault et al. 2019). Competition assays of the same evolved populations showed a selective advantage for several TE insertions under stress conditions with heavy metals.

In the context of this study, it is conceivable that the human-associated, hybrid strains that have been rapidly dispersed across the globe experienced a range of novel, suboptimal environments inducing a stress response (Jeffares 2018). Indeed, most strains used in this study were isolated from diverse substrates (Jeffares et al. 2015). Despite these apparent opportunities for adaptive evolution, the vast majority of full-length elements conformed to a signature of purifying selection. Full-length elements segregated at lower than expected frequency suggesting that most of them were inserted recently (transposition burst) and rapidly removed by purifying selection and/or reduced to solo-LTRs by homologous recombination limiting the time frame of active proliferation. Our results do not exclude the adaptive potential of TEs, but instead suggest limitation of adaptive evolution to short periods of stress after which the selective advantage is lost. Nieuwenhuis et al. (2018), for instance, have documented rapid transitions between hetero- and homothallism during experimentally induced adaptive divergence, and Esnault et al. (2019) provided evidence for a contribution of TEs in environmental stress response. In this study, we identified only one full-length element candidate for pervasive long-term positive selection present in both ancestral backgrounds. However, the functional significance of this insertion is not clear and warrants future experimental exploration.

## Conclusions



This study offers a comprehensive characterization of the global diversity of transposable elements in *S. pombe*. Phylogenetic and population genetic approaches provide first evidence for the ‘genomic shock hypothesis’ in fungi and copious examples of homologous recombination among full-length and solo-LTR sequences. Consistent with established principles of molecular evolution, TE insertions were generally subject to purging with the exception of a single locus. These results contribute to the debate on the role of TEs in evolution, notably in speciation and adaptation (Serrato-Capuchina and Matute 2018).

## Methods

Previously, a world-wide collection of 161 naturally occurring *S. pombe* strains (JB strains) has been grouped into 57 clades differing by at least 1,900 SNPs (Jeffares et al. 2015). Within each cluster, strains are near clonal. In this study, we compiled single-molecule long-read sequencing data for strains representing 29 clades that cover the spectrum of genetic variation in the species by i) selecting samples along the phylogeny (**Supplementary figure 2**), ii) including previously reported genetic groups (Jeffares et al. 2015; Tusso et al. 2019) and iii) considering genomic variation of strain ancestry (**Figure 1** and **Supplementary figure 1**). For 17 strains that correspond to 16 clades, data are publicly available (Tusso et al. 2019). Two of the 17 strains, previously referred to as EBC131\_JB1171 and EBC132\_JB1174, were found to belong to the same clade represented by the strain JB900, and were thus referred to as JB900\_EBC131 and JB900\_EBC132 in this study. Another set of single-molecule long-read sequencing data from 20 strains were generated in this study. These 20 strains include strains covering 13 additional clades, two strains not belonging to the 57 clades, and 5 strains sharing cluster affiliation with 5 of the 17 previously published strains. The independent sequencing of two clones/strains per clade for 6 clades allows testing the consistency of the pipeline and assessing mutations within clades. With the inclusion of the already assembled



reference genome, the final data set was comprised of 38 samples. Sample details and accession numbers are available in **Supplementary table 1**.

### *Genome assemblies*

The previously published genome assemblies of 17 strains are available at National Center for Biotechnology Information (NCBI) under the accession number PRJNA527756. PacBio long-read sequencing data were generated for the other 20 strains. We performed *de novo* assembly for these 20 strains using two independent assemblers: Canu version 1.8 and wtdbg version 2.4 (Koren et al. 2017; Ruan and Li 2020). The parameters settings were 'genomeSize=12.5m' for Canu and '-x sq -L 3000 -g 12.5m' for wtdbg. For JB4 and JB1180, which were sequenced using the PacBio RS II platform, we used the option '-x rs' when running wtdbg. QUAST version 5.0.2 was used to evaluate the assembly quality (Gurevich et al. 2013). For each strain, only the assembly with the superior quality was kept for further improvement. GCpp version 0.0.1 was run to polish the assemblies using the Arrow algorithm and long reads. Subsequently, finisherSC version 2.1 was applied to further improve the assembly (Lam et al. 2015). This was followed by another round of GCpp polishing. For JB1180, the assemblies generated by Canu and wtdbg were of poor quality, and we instead used SMRT Analysis Software version 2.3.0 to obtain a higher quality assembly.

### *Phylogenetic analyses and the inference of ancestry blocks*

We performed two analyses using SNP variants: first, phylogenetic analyses using genome-wide SNP data (**Supplementary figure 2**); and second, a previously reported pipeline to identify the composition of *Sp* and *Sk* ancestral haplotype blocks along the genome (**Supplementary figure 1**) (Tusso et al. 2019). For SNPs derived from short-read sequencing

data, we used a publicly available data set in variant call format (VCF) (Jeffares et al. 2015). SNP variation of the *de-novo* genomes (this study) was inferred via alignment to the reference genome (ASM294v264) (Wood et al. 2002) and subsequent characterization of variants with the package *MUMmer* 3.23 (function *show-snps*) (Kurtz et al. 2004). Repetitive sequences in the reference were identified with *RepeatMasker* 4.0.8 (Smit et al. 2013) and excluded for SNP variant calling. For the phylogenetic analyses, genome sequences were reconstructed in *fasta* format by editing the reference genome with the SNP information for each sample using a customized python script. The analysis was performed independently for each chromosome. Alignments of all samples, including short and long read data, were used to build a maximum likelihood tree using *RaxML* 8.2.10-gcc-mpi (Stamatakis 2014) with default parameters, GTRGAMMAI approximation, final optimization with GTR + GAMMA + I and 1,000 bootstraps. Final trees were visualized using FigTree 1.4.3 (<http://tree.bio.ed.ac.uk/software/figtree/>, last accessed January 2019).

For inference of ancestral *Sp* and *Sk* haplotype blocks along the genome we followed (Tusso et al. 2019). In short, the two ancestral populations substantially differ in genetic diversity ( $\pi$ ). This difference allows to cluster samples by population in a PCA in a window-based approach along the genome.

Strain identities and ancestral block distribution were consistent between short-read data (Jeffares et al. 2015) and long-read data (this study).

### *Genome annotation of transposable elements*

For each *de-novo* genome, we followed the *CARP* wrapper (Zeng et al. 2018) to identify and annotate repetitive sequences. In brief, repetitive sequences were retrieved by sequence

comparisons within and between contigs using *muscle* 3.8.31 (Edgar 2004) and were subsequently summarized in consensus sequences with *igor* (Kortschak and Adelson 2015). Repeat sequences were then clustered into families based on sequence similarity with *blast* 2.7.1 (Altschul et al. 1990). Each family was annotated, and TEs were identified from other repeat sequences using a reference of known TE sequences for *S. pombe* and other fungi, obtained from the database *Repbase* (Bowen 2003; Bao et al. 2015). Unidentified sequences were compared to protein sequences, transposable elements in other species and retrovirus sequences using *blast* 2.7.1. Sequence references were obtained from the data base hosted by National Center for Biotechnology Information (<https://www.ncbi.nlm.nih.gov/>) using the following search terms: reverse transcriptase, transposon, repetitive element, RNA-directed DNA polymerase, pol protein, non-LTR retrotransposon, mobile element, retroelement, polyprotein, retrovirus and polymerase (access date Jan-2020).

To reduce ascertainment bias introduced by comparison to published elements, we complemented this final set with novel repeat sequences obtained from *LTR\_Finder* 1.0.7 (Xu and Wang 2007) and *RepeatMasker* 4.0.8 (Smit et al. 2013). Identified sequences were pooled and used as reference in a second round of the whole pipeline, aiming to extend the finding of repeats that may differ from the already known reference sequences. Annotations of combined sequences retrieved from all packages were merged based on overlapping coordinates using *bedtools* (Quinlan and Hall 2010).

Different natural strains in *S. pombe* are known to have large structural variants, including inversions exceeding 1 Mb in length and inter-chromosomal translocations (Brown et al. 2011; Teresa Avelar et al. 2013; Zanders et al. 2014; Tusso et al. 2019). In order to establish synteny between samples, all annotated coordinates were translated to the reference genome.

For this, we produced a liftover of all genomic positions between each *de-novo* genome and the repeat-masked reference genome using *flo* (Pracana et al. 2017) and *liftOver* 2017-03-14 (Kent et al. 2002) requiring a minimum match of 0.7. Then we used customised python and R scripts to identify translated coordinates of flanking sequences to breaking points for each TE element. Since TEs could occur in tandem reaching up to 8 individual TE sequences per cluster, several sequences will share the same adjacent, non-repetitive sequences within the sequence space of the masked reference genome and were grouped as clusters. In the case of several TE sequences per cluster, the position of the breaking points in the original de-novo genome were then shifted along the corresponding 3' and/or 5' axis until finding the first non-repetitive base in the lift over (**Supplementary figure 15**). As a result, TE sequences within a cluster will all share the same flanking insertion breakpoint coordinates of the cluster; yet, information on the direction and position within the cluster was retained. The final list of transposable sequences, the position of the cluster they belong to and their individual location and direction can be found in **Supplementary table 3**.

We compared the list of TE elements extracted in previous work to validate our pipeline in two ways. First, we compared LTRs detected in the reference genome by Bowen *et al.* (Bowen 2003) and our annotation of TE sequences in the reference genome; Second, we compared presence/absence scores from our data with scores based on paired-end short-read Illumina data from Jeffares *et al* 2015 (Jeffares et al. 2015) (**Supplementary table 4**) for all strains. In the first case, we converted the cosmid-based coordinates of the LTRs annotated by Bowen et al. to coordinates in the current version of the reference genome by BLAST and manual adjustment (**Supplementary table 5**), and then used genomic coordinates of Bowen's sequences to group sequences in the same clusters as we did for long read assemblies. We counted the number of sequences per cluster. For the second comparison in other samples and

Jeffares *et al.* data set, we restricted this comparison to samples showing consistent strain ID between short- and long-read data. Differences observed between short- and long-read data (**Supplementary figure 7**), were contrasted with differences observed between clonal strains using only *de-novo* genomes from long reads (**Supplementary figure 6**).

# *Phylogenetic analyses*

We use a customised python script to extract TE sequences of minimum length 100 bp from *de-novo* genomes using annotated coordinates for each sample. Consensus sequences from all samples produced in *CARP* were then used as reference for each query sequence. Query sequences were differentiated between solo-LTRs, fragmented TEs with one or no flanking LTR sequence, and full-length elements containing both flanking LTRs. Two alignments were produced: one for full-length TE sequences longer than 1.5 kb; and another one for LTR sequences including solo-LTRs and all flanking LTRs associated to elements > 1.5 kb. Other cut-offs between 1kb and 2kb gave qualitative similar results. Alignments were produced using *MAFFT* 7.407 (Katoh and Standley 2013) with default parameters. These alignments were used to produce a maximum-likelihood tree with *IQ-Tree* 1.6.10-omp-mpi (Nguyen et al. 2015) using the incorporated model prediction with *ModelFinder* (Kalyaanamoorthy et al. 2017) and 1000 ultrafast bootstrap (UFBoot) (Minh et al. 2013). Un-rooted trees were visualised and annotated with the R package *ggtree* 2.4.1 (Yu et al. 2017). Since different LTR families have been previously identified in the reference genome (Bowen 2003), we used genomic coordinates of known LTR sequences to place solo-LTR families for other strains in the phylogeny.

# *Recombinant TE haplotypes*

In order to identify potential recombinant haplotypes, the alignment of full-length elements was divided into small windows of 30 bp. Other windows sizes like 20 and 10 bp were also tested with similar results. For each window, pairwise comparisons between sequences were performed. If sequences within windows differed by more than 2 bp, they were classified as different. When a sequence was equidistant to two already identified haplotypes, it was grouped to the first comparison. However, these cases were rather rare and do not have major impact on the general results. Then, to identify whole sequence haplotypes (all windows), pairwise comparisons between whole sequences was performed (**Supplementary figure 16**). Haplotypes were scored as identical if they contained the same succession of identical 30 bp windows. To reduce the vast number of resulting haplotypes we allowed one window to be different between sequences. Haplotypes were filtered, considering only haplotypes with at least 50% of the entire sequence and with at least 5 sequences (either paralogs or orthologs). This reduced the data set to 11 common haplotypes.

A similar analysis was performed for solo-LTRs and flanking LTRs. LTRs fragment were short (~350 bp or ~1060bp in the alignment including insertions and deletions) precluding the windows-based approach. Instead, we used the full alignments focusing on the most common LTR families ( $\alpha$  and  $\beta$ ). We identified potential recombinant haplotypes by looking first for diagnostic variants of each family. For this, diagnostic variants constituted those near-fixed between families ( $> 0.8$  frequency in one family;  $< 0.2$  in the other) (**Supplementary figure 9**). These diagnostic variants were contrasted with sequences in the Sub- $\alpha$  group and used to identify recombinant haplotypes. Sequences were grouped into haplotypes on the basis of pairwise comparisons of diagnostic variants. Two sequences were considered from a different haplotype if they differed in up to two diagnostic variants.

# *Testing the ‘genomic shock hypothesis’*

To test the hypothesis of TE reactivation in admixed genomes, we performed linear models to assess the relationship between admixture proportions (from pure *Sp* or *Sk* to 0.5 admixture) as explanatory variable and number of clusters containing at least one full-length TE as response. The normality assumption of the residuals held as assessed by the R package *olsrr* 0.5.3 setting a maximum. p-value threshold of 0.05 (<https://olsrr.rsquaredacademy.com/>). Additionally, we restricted the analyses to the presumably more recent insertions including only those clusters exclusively consisting of a single full-length element in a single sample (**Supplementary figure 13**). Analyses were performed including both TF1 and TF2 haplotypes, as well as for each haplotype independently.

# *Population genetic analyses*

The frequency distribution of syntenic TE sequences among non-clonal strains was summarized in one- and two-dimensional site frequency spectra (SFS). Referenced coordinates from all TE sequences were used to allocate sequences to clusters using a customised R script. Clusters sharing the same start and end coordinates, allowing for a 100 bp error margin on each side of the repetitive cluster, were defined as syntenic loci. Error margins of 150 and 200 bp yielded similar results (**Supplementary figure 17**). The error margin was necessary to account for variation introduced by the liftover. Spacing between clusters exceeded a minimum of 500 bp in all cases to guard against false positive inference of synteny of adjacent clusters. Presence / absence of orthologues clusters was then scored as allelic state of the locus. Allele frequencies were summarized for all clusters by the derived state and summarized in an unfolded one-dimensional site frequency spectrum (**Figure 4a**). Note that the SFS is unfolded, since insertions naturally constitute the derived state. Only non-clonal strains were included to produce the SFS.

In addition, we obtained a two-dimensional site frequency spectrum (2dSFS) considering allele-frequency sharing between syntenic clusters surrounded by either *Sp* and *Sk* ancestry. Ancestry was inferred by classifying SNP information in the flanking sequences of insertion breakpoints for each cluster and sample by *Sp* and *Sk* ancestry (Tusso et al. 2019). For each locus, allele frequencies were separately estimated for each ancestral background resulting in an unfolded 2dSFS. In addition to simple presence/absence scoring, alleles were scored according to the number of sequences within cluster, their family and direction of insertion – yielding comparable results (**Figure 4b** and **Supplementary figure 18**). In both cases, only variants with at least 4 samples per genetic background were considered.

One- and two-dimensional site frequency spectra were calculated for all TE sequences (**Figure 4b**) and separately for full-length elements (**Figure 4c**). In order to create a neutral expectation, a two-dimensional site frequency spectrum was likewise produced from non-coding genome-wide SNPs using the same set of non-clonal strains. We used identified SNP variation and genome annotation for the *S. pombe* reference genome (ASM294v2.22) to include only non-coding variants. SNP variation found in repetitive regions were also excluded. SNPs were filtered using *vcftools* 0.1.16 (Danecek et al. 2011). This resulted in a final data set of 209,690 variant sites. Allele frequencies to produce a two-dimensional site frequency spectrum from VCF file were calculated using the R package *SNPRelate* 1.24.0 (Zheng et al. 2012). In the absence of an appropriate outgroup, SNP variants cannot be polarized into an ancestral and derive state. To allow direct comparisons between SFS between TEs and SNPs, the two-dimensional site frequency spectrum of TEs was also folded (**Supplementary figure 14**).



## Sequence divergence of LTRs

To assess the levels of sequence divergence of TEs, we calculated divergence between all solo-LTR and flanking LTR sequences as a function of the genomic background ( $S_p$  or  $S_k$ ) they are embedded in. We divided sequences by cluster and family according to phylogenetic reconstruction (**Figure 2a**), and used the R package *ape* 5.4-1 (Paradis and Schliep 2019) to calculate pair-wise Kimura's 2-parameters distance (Kimura 1980) within and between ancestral backgrounds. Additionally, we measured divergence between the 5' and 3' flanking LTR sequences of each full-length TE element as a proxy of the age of its individual insertion (**Supplementary figure 12**).

## Data Access

PacBio sequencing data and genome assemblies of the new 20 strains have been deposited at the China National GeneBank (CNGB) Sequence Archive (CNSA) (<https://db.cngb.org/cnsa>) (Guo et al. 2020). The accession numbers of sequencing data are CNR0385540–CNR0385559. The accession numbers of assemblies are CNA0022729–CNA0022748. Other samples were previously published (Tusso et al. 2019) and available at NCBI Sequence Read Archive, BioProject ID PRJNA527756.

## Competing interests

The authors declare no competing interests.

## Acknowledgments

We thank S. Lorena Ament-Velásquez, Fidel Botero-Castro, Bart P.S. Nieuwenhuis, Claire Peart, Ricardo Pereira, Alexander Suh, Vera Warmuth, Matthias Weissensteiner and

members of the Wolf and Du labs for providing intellectual input on the various analyses, and comments on the manuscript. Funding was provided by LMU Munich (JW). The computational infrastructure was provided by the UPPMAX Next-Generation Sequencing Cluster and Storage (UPPNEX) project funded by the Knut and Alice Wallenberg Foundation and the Swedish National Infrastructure for Computing.

## Contributions

ST, LLD and JW conceived the study; All analyses were performed by ST and FS with contributions from YL in genome annotation of transposable elements analyses. ST and JW wrote the manuscript with input from FS, YL and LLD.

## References

- Abbott R, Albach D, Ansell S, Arntzen JW, Baird SJE, Bierne N, Boughman J, Brelsford A, Buerkle CA, Buggs R, et al. 2013. Hybridization and speciation. *Journal of Evolutionary Biology* **26**: 229–246.
- Altschul SF, Gish W, Miller W, Myers EW, Lipman DJ. 1990. Basic local alignment search tool. *Journal of Molecular Biology* **215**: 403–410.
- Aminetzach YT, Macpherson JM, Petrov DA. 2005. Pesticide Resistance via Transposition-Mediated Adaptive Gene Truncation in *Drosophila*. *Science* **309**: 764–767.
- Bao W, Kojima KK, Kohany O. 2015. Repbase Update, a database of repetitive elements in eukaryotic genomes. *Mobile DNA* **6**: 11.
- Barrón MG, Fiston-Lavier A-S, Petrov DA, González J. 2014. Population Genomics of Transposable Elements in *Drosophila*. *Annual Review of Genetics* **48**: 561–581.
- Barton NH. 2001. The role of hybridization in evolution. *Mol Ecol* **10**: 551–568.
- Bingham PM, Kidwell MG, Rubin GM. 1982. The molecular basis of P-M hybrid dysgenesis: The role of the P element, a P-strain-specific transposon family. *Cell* **29**: 995–1004.
- Blass E, Bell M, Boissinot S. 2012. Accumulation and Rapid Decay of Non-LTR Retrotransposons in the Genome of the Three-Spine Stickleback. *Genome Biology and Evolution* **4**: 687–702.
- Blumenstiel JP, Chen X, He M, Bergman CM. 2014. An Age-of-Allele Test of Neutrality for Transposable Element Insertions. *Genetics* **196**: 523–538.
- Bourgeois Y, Boissinot S. 2019. On the Population Dynamics of Junk: A Review on the Population Genomics of Transposable Elements. *Genes* **10**: 419.

- 812 Bowen NJ. 2003. Retrotransposons and Their Recognition of pol II Promoters: A Comprehensive  
813 Survey of the Transposable Elements From the Complete Genome Sequence of  
814 *Schizosaccharomyces pombe*. *Genome Research* **13**: 1984–1997.
- 815 Brown WRA, Liti G, Rosa C, James S, Roberts I, Robert V, Jolly N, Tang W, Baumann P, Green C,  
816 et al. 2011. A Geographically Diverse Collection of *Schizosaccharomyces pombe* Isolates  
817 Shows Limited Phenotypic Variation but Extensive Karyotypic Diversity. *G3&#58;  
818 Genes/Genomes/Genetics* **1**: 615–626.
- 819 Bucheton A, Paro R, Sang HM, Pelisson A, Finnegan DJ. 1984. The molecular basis of I-R hybrid  
820 Dysgenesis in drosophila melanogaster: Identification, cloning, and properties of the I factor.  
821 *Cell* **38**: 153–163.
- 822 Cam HP, Noma K, Ebina H, Levin HL, Grewal SIS. 2008. Host genome surveillance for  
823 retrotransposons by transposon-derived proteins. *Nature* **451**: 431–436.
- 824 Casola C, Hucks D, Feschotte C. 2008. Convergent Domestication of pogo-like Transposases into  
825 Centromere-Binding Proteins in Fission Yeast and Mammals. *Molecular Biology and  
826 Evolution* **25**: 29–41.
- 827 Charlesworth B. 2009. Fundamental concepts in genetics: Effective population size and patterns of  
828 molecular evolution and variation. *Nat Rev Genet* **10**: 195–205.
- 829 Charlesworth B, Charlesworth D. 1983. The population dynamics of transposable elements. *Genetics  
830 Research* **42**: 1–27.
- 831 Charlesworth B, Langley CH. 1989. The population genetics of drosophila transposable elements.  
832 *Annu Rev Genet* **23**: 251–287.
- 833 Chen D, Toone WM, Mata J, Lyne R, Burns G, Kivinen K, Brazma A, Jones N, Bähler J. 2003.  
834 Global Transcriptional Responses of Fission Yeast to Environmental Stress. *Mol Biol Cell* **14**:  
835 214–229.
- 836 Coyne JA. 1985. Genetic studies of three sibling species of *Drosophila* with relationship to theories of  
837 speciation. *Genetics Research* **46**: 169–192.
- 838 Cridland JM, Macdonald SJ, Long AD, Thornton KR. 2013. Abundance and Distribution of  
839 Transposable Elements in Two *Drosophila* QTL Mapping Resources. *Molecular Biology and  
840 Evolution* **30**: 2311–2327.
- 841 Danecek P, Auton A, Abecasis G, Albers CA, Banks E, DePristo MA, Handsaker RE, Lunter G,  
842 Marth GT, Sherry ST, et al. 2011. The variant call format and VCFtools. *Bioinformatics* **27**:  
843 2156–2158.
- 844 de Boer JG, Yazawa R, Davidson WS, Koop BF. 2007. Bursts and horizontal evolution of DNA  
845 transposons in the speciation of pseudotetraploid salmonids. *BMC Genomics* **8**: 422.
- 846 Dion-Côté A-M, Renaut S, Normandeau E, Bernatchez L. 2014. RNA-seq Reveals Transcriptomic  
847 Shock Involving Transposable Elements Reactivation in Hybrids of Young Lake Whitefish  
848 Species. *Molecular Biology and Evolution* **31**: 1188–1199.
- 849 Dolgin ES, Charlesworth B, Cutter AD. 2008. Population frequencies of transposable elements in  
850 selfing and outcrossing *Caenorhabditis* nematodes. *Genetics Research* **90**: 317–329.

851 Dowling TE, Secor and CL. 1997. The role of hybridization and introgression in the diversification of  
852 animals. *Annual Review of Ecology and Systematics* **28**: 593–619.

853 Edgar RC. 2004. MUSCLE: multiple sequence alignment with high accuracy and high throughput.  
854 *Nucleic Acids Research* **32**: 1792–1797.

855 Esnault C, Lee M, Ham C, Levin HL. 2019. Transposable element insertions in fission yeast drive  
856 adaptation to environmental stress. *Genome Res* **29**: 85–95.

857 Esnault C, Levin HL. 2015. The Long Terminal Repeat Retrotransposons Tf1 and Tf2 of  
858 *Schizosaccharomyces pombe*. *Microbiol Spectr* **3**.

859 García Guerreiro MP, Chávez-Sandoval BE, Balanyà J, Serra L, Fontdevila A. 2008. Distribution of  
860 the transposable elements bilbo and gypsy in original and colonizing populations of  
861 *Drosophila subobscura*. *BMC Evolutionary Biology* **8**: 234.

862 Göbel U, Arce AL, He F, Rico A, Schmitz G, de Meaux J. 2018. Robustness of Transposable Element  
863 Regulation but No Genomic Shock Observed in Interspecific Arabidopsis Hybrids. *Genome*  
864 *Biology and Evolution* **10**: 1403–1415.

865 González J, Macpherson JM, Messer PW, Petrov DA. 2009. Inferring the Strength of Selection in  
866 *Drosophila* under Complex Demographic Models. *Molecular Biology and Evolution* **26**: 513–  
867 526.

868 Gresham D, Desai MM, Tucker CM, Jenq HT, Pai DA, Ward A, DeSevo CG, Botstein D, Dunham  
869 MJ. 2008. The Repertoire and Dynamics of Evolutionary Adaptations to Controlled Nutrient-  
870 Limited Environments in Yeast ed. M. Snyder. *PLoS Genetics* **4**: e1000303.

871 Guo X, Chen F, Gao F, Li L, Liu K, You L, Hua C, Yang F, Liu W, Peng C, et al. 2020. CNSA: a  
872 data repository for archiving omics data. *Database* **2020**.  
873 <https://doi.org/10.1093/database/baaa055> (Accessed June 22, 2021).

874 Guo Y, Levin HL. 2010. High-throughput sequencing of retrotransposon integration provides a  
875 saturated profile of target activity in *Schizosaccharomyces pombe*. *Genome Res* **20**: 239–248.

876 Gurevich A, Saveliev V, Vyahhi N, Tesler G. 2013. QUAST: quality assessment tool for genome  
877 assemblies. *Bioinformatics* **29**: 1072–1075.

878 Han JS, Szak ST, Boeke JD. 2004. Transcriptional disruption by the L1 retrotransposon and  
879 implications for mammalian transcriptomes. *Nature* **429**: 268–274.

880 Hansen KR, Burns G, Mata J, Volpe TA, Martienssen RA, Bähler J, Thon G. 2005. Global Effects on  
881 Gene Expression in Fission Yeast by Silencing and RNA Interference Machineries.  
882 *Molecular and Cellular Biology* **25**: 590–601.

883 Hazzouri KM, Mohajer A, Dejak SI, Otto SP, Wright SI. 2008. Contrasting Patterns of Transposable-  
884 Element Insertion Polymorphism and Nucleotide Diversity in Autotetraploid and  
885 Allotetraploid Arabidopsis Species. *Genetics* **179**: 581–592.

886 Hénault M, Marsit S, Charron G, Landry CR. 2020. The effect of hybridization on transposable  
887 element accumulation in an undomesticated fungal species eds. K.J. Verstrepen, P.J.  
888 Wittkopp, and D. Bensasson. *eLife* **9**: e60474.

889 Hey J. 1988. Speciation via hybrid dysgenesis: negative evidence from the *Drosophila affinis*  
890 subgroup. *Genetica* **78**: 97–103.

891 Hoban S, Kelley JL, Lotterhos KE, Antolin MF, Bradburd G, Lowry DB, Poss ML, Reed LK, Storfer  
892 A, Whitlock MC. 2016. Finding the Genomic Basis of Local Adaptation: Pitfalls, Practical  
893 Solutions, and Future Directions. *The American Naturalist* **188**: 379–397.

894 Hof AE van't, Campagne P, Rigden DJ, Yung CJ, Lingley J, Quail MA, Hall N, Darby AC, Saccheri  
895 IJ. 2016. The industrial melanism mutation in British peppered moths is a transposable  
896 element. *Nature* **534**: 102–105.

897 Hoff EF, Levin HL, Boeke JD. 1998. Schizosaccharomyces pombe retrotransposon Tf2 mobilizes  
898 primarily through homologous cDNA recombination. *Molecular and cellular biology* **18**:  
899 6839–6852.

900 Irelan JT, Gutkin GI, Clarke L. 2001. Functional redundancies, distinct localizations and interactions  
901 among three fission yeast homologs of centromere protein-B. *Genetics* **157**: 1191–1203.

902 Jeffares DC. 2018. The natural diversity and ecology of fission yeast. *Yeast* **35**: 253–260.

903 Jeffares DC, Rallis C, Rieux A, Speed D, Převorovský M, Mourier T, Marsellach FX, Iqbal Z, Lau W,  
904 Cheng TMK, et al. 2015. The genomic and phenotypic diversity of Schizosaccharomyces  
905 pombe. *Nat Genet* **47**: 235–241.

906 Josefsson C, Dilkes B, Comai L. 2006. Parent-Dependent Loss of Gene Silencing during Interspecies  
907 Hybridization. *Current Biology* **16**: 1322–1328.

908 Kalyaanamoorthy S, Minh BQ, Wong TKF, von Haeseler A, Jermiin LS. 2017. ModelFinder: fast  
909 model selection for accurate phylogenetic estimates. *Nature Methods* **14**: 587–589.

910 Katoh K, Standley DM. 2013. MAFFT Multiple Sequence Alignment Software Version 7:  
911 Improvements in Performance and Usability. *Mol Biol Evol* **30**: 772–780.

912 Kawakami T, Dhakal P, Katterhenry AN, Heatherington CA, Ungerer MC. 2011. Transposable  
913 Element Proliferation and Genome Expansion Are Rare in Contemporary Sunflower Hybrid  
914 Populations Despite Widespread Transcriptional Activity of LTR Retrotransposons. *Genome  
915 Biology and Evolution* **3**: 156–167.

916 Kazazian HH. 2004. Mobile Elements: Drivers of Genome Evolution. *Science* **303**: 1626–1632.

917 Kent WJ, Sugnet CW, Furey TS, Roskin KM, Pringle TH, Zahler AM, Haussler and D. 2002. The  
918 Human Genome Browser at UCSC. *Genome Res* **12**: 996–1006.

919 Kidwell MG. 1983. Evolution of hybrid dysgenesis determinants in Drosophila melanogaster. *PNAS*  
920 **80**: 1655–1659.

921 Kidwell MG, Kidwell JF, Sved JA. 1977. Hybrid Dysgenesis in DROSOPHILA MELANOGASTER:  
922 A Syndrome of Aberrant Traits Including Mutation, Sterility and Male Recombination.  
923 *Genetics* **86**: 813–833.

924 Kimura M. 1980. A simple method for estimating evolutionary rates of base substitutions through  
925 comparative studies of nucleotide sequences. *J Mol Evol* **16**: 111–120.

926 Kimura M, Ohta T. 1973. The Age of a Neutral Mutant Persisting in a Finite Population. *Genetics* **75**:  
927 199–212.

928 Koren S, Walenz BP, Berlin K, Miller JR, Bergman NH, Phillippy AM. 2017. Canu: scalable and  
929 accurate long-read assembly via adaptive  $k$ -mer weighting and repeat separation. *Genome*  
930 *Research* **27**: 722–736.

931 Kortschak RD, Adelson DL. 2015. bíogo: a simple high-performance bioinformatics toolkit for the  
932 Go language. *bioRxiv* 005033.

933 Kurtz S, Phillippy A, Delcher AL, Smoot M, Shumway M, Antonescu C, Salzberg SL. 2004.  
934 Versatile and open software for comparing large genomes. *Genome biology* **5**: R12.

935 Lam K-K, LaButti K, Khalak A, Tse D. 2015. FinisherSC: a repeat-aware tool for upgrading de novo  
936 assembly using long reads. *Bioinformatics* **31**: 3207–3209.

937 Leem Y-E, Ripmaster TL, Kelly FD, Ebina H, Heincelman ME, Zhang K, Grewal SIS, Hoffman CS,  
938 Levin HL. 2008. Retrotransposon Tf1 Is Targeted to Pol II Promoters by Transcription  
939 Activators. *Molecular Cell* **30**: 98–107.

940 Levin HL. 1995. A novel mechanism of self-primed reverse transcription defines a new family of  
941 retroelements. *Molecular and Cellular Biology* **15**: 3310–3317.

942 Levin HL, Weaver DC, Boeke JD. 1990. Two related families of retrotransposons from  
943 *Schizosaccharomyces pombe*. *Molecular and Cellular Biology* **10**: 6791–6798.

944 Lockton S, Ross-Ibarra J, Gaut BS. 2008. Demography and weak selection drive patterns of  
945 transposable element diversity in natural populations of *Arabidopsis lyrata*. *PNAS* **105**:  
946 13965–13970.

947 Lorenz DR, Mikheyeva IV, Johansen P, Meyer L, Berg A, Grewal SIS, Cam HP. 2012. CENP-B  
948 Cooperates with Set1 in Bidirectional Transcriptional Silencing and Genome Organization of  
949 Retrotransposons. *Molecular and Cellular Biology* **32**: 4215–4225.

950 Lozovskaya ER, Scheinker VS, Evgen'ev MB. 1990. A Hybrid Dysgenesis Syndrome in *Drosophila*  
951 *Virilis*. *Genetics* **126**: 619–623.

952 Lynch M, Walsh B. 2007. *The origins of genome architecture*. Sinauer Associates Sunderland, MA.

953 Manthey JD, Moyle RG, Boissinot S. 2018. Multiple and Independent Phases of Transposable  
954 Element Amplification in the Genomes of Piciformes (Woodpeckers and Allies). *Genome*  
955 *Biology and Evolution* **10**: 1445–1456.

956 Matute DR, Comeault AA, Earley E, Serrato-Capuchina A, Peede D, Monroy-Eklund A, Huang W,  
957 Jones CD, Mackay TFC, Coyne JA. 2019. Rapid and Predictable Evolution of Admixed  
958 Populations Between Two *Drosophila* Species Pairs. *Genetics*.  
959 <https://www.genetics.org/content/early/2019/11/25/genetics.119.302685> (Accessed April 16,  
960 2021).

961 McClintock B. 1984. The significance of responses of the genome to challenge. *Science* **226**: 792–  
962 801.

963 Miller WJ, McDonald JF, Nouaud D, Anxolabéhère D. 1999. Molecular domestication--more than a  
964 sporadic episode in evolution. *Genetica* **107**: 197–207.

965 Minh BQ, Nguyen MAT, von Haeseler A. 2013. Ultrafast Approximation for Phylogenetic Bootstrap.  
966 *Mol Biol Evol* **30**: 1188–1195.



967 Murton HE, Grady PJR, Chan TH, Cam HP, Whitehall SK. 2016. Restriction of Retrotransposon  
968 Mobilization in *Schizosaccharomyces pombe* by Transcriptional Silencing and Higher-Order  
969 Chromatin Organization. *Genetics* **203**: 1669–1678.

970 Nguyen L-T, Schmidt HA, von Haeseler A, Minh BQ. 2015. IQ-TREE: A Fast and Effective  
971 Stochastic Algorithm for Estimating Maximum-Likelihood Phylogenies. *Molecular Biology*  
972 *and Evolution* **32**: 268–274.

973 Nieuwenhuis BPS, Tusso S, Bjerling P, Stångberg J, Wolf JBW, Immler S. 2018. Repeated evolution  
974 of self-compatibility for reproductive assurance. *Nature Communications* **9**: 1639.

975 Pace JK, Feschotte C. 2007. The evolutionary history of human DNA transposons: Evidence for  
976 intense activity in the primate lineage. *Genome Res* **17**: 422–432.

977 Paquin CE, Williamson VM. 1984. Temperature Effects on the Rate of Ty Transposition. *Science*  
978 **226**: 53–55.

979 Paradis E, Schliep K. 2019. ape 5.0: an environment for modern phylogenetics and evolutionary  
980 analyses in R. *Bioinformatics* **35**: 526–528.

981 Petrov DA, Lozovskaya ER, Hartl DL. 1996. High intrinsic rate of DNA loss in *Drosophila*. *Nature*  
982 **384**: 346–349.

983 Piegu B, Guyot R, Picault N, Roulin A, Saniyal A, Kim H, Collura K, Brar DS, Jackson S, Wing RA,  
984 et al. 2006. Doubling genome size without polyploidization: Dynamics of retrotransposition-  
985 driven genomic expansions in *Oryza australiensis*, a wild relative of rice. *Genome Res* **16**:  
986 1262–1269.

987 Pracana R, Priyam A, Levantis I, Nichols RA, Wurm Y. 2017. The fire ant social chromosome  
988 supergene variant Sb shows low diversity but high divergence from SB. *Molecular Ecology*  
989 **26**: 2864–2879.

990 Quinlan AR, Hall IM. 2010. BEDTools: a flexible suite of utilities for comparing genomic features.  
991 *Bioinformatics* **26**: 841–842.

992 Renaut S, Rowe HC, Ungerer MC, Rieseberg LH. 2014. Genomics of homoploid hybrid speciation:  
993 diversity and transcriptional activity of long terminal repeat retrotransposons in hybrid  
994 sunflowers. *Philosophical Transactions of the Royal Society B: Biological Sciences* **369**:  
995 20130345.

996 Ruan J, Li H. 2020. Fast and accurate long-read assembly with wtdbg2. *Nat Methods* **17**: 155–158.

997 Ruggiero RP, Bourgeois Y, Boissinot S. 2017. LINE Insertion Polymorphisms are Abundant but at  
998 Low Frequencies across Populations of *Anolis carolinensis*. *Front Genet* **8**.  
999 <https://www.frontiersin.org/articles/10.3389/fgene.2017.00044/full> (Accessed February 18,  
1000 2021).

1001 Schrader L, Schmitz J. 2019. The impact of transposable elements in adaptive evolution. *Molecular*  
1002 *Ecology* **28**: 1537–1549.

1003 Sehgal A, Lee C-YS, Espenshade PJ. 2007. SREBP Controls Oxygen-Dependent Mobilization of  
1004 Retrotransposons in Fission Yeast. *PLOS Genetics* **3**: e131.

1005 Serrato-Capuchina A, Matute DR. 2018. The Role of Transposable Elements in Speciation. *Genes*  
1006 (*Basel*) **9**. <https://www.ncbi.nlm.nih.gov/pmc/articles/PMC5977194/> (Accessed April 13,  
1007 2021).

1008 Smit A, Hubley R, Green P. 2013. *RepeatMasker Open-4.0*. <http://www.repeatmasker.org>.

1009 Smukowski Heil C, Patterson K, Hickey AS-M, Alcantara E, Dunham MJ. 2020. Transposable  
1010 element mobilization in interspecific yeast hybrids. *bioRxiv* 2020.06.16.155218.

1011 Stamatakis A. 2014. RAxML version 8: a tool for phylogenetic analysis and post-analysis of large  
1012 phylogenies. *Bioinformatics* **30**: 1312–1313.

1013 Staton SE, Ungerer MC, Moore RC. 2009. The genomic organization of Ty3/gypsy-like  
1014 retrotransposons in *Helianthus* (Asteraceae) homoploid hybrid species. *American Journal of*  
1015 *Botany* **96**: 1646–1655.

1016 Stritt C, Gordon SP, Wicker T, Vogel JP, Roulin AC. 2018. Recent Activity in Expanding Populations  
1017 and Purifying Selection Have Shaped Transposable Element Landscapes across Natural  
1018 Accessions of the Mediterranean Grass *Brachypodium distachyon*. *Genome Biology and*  
1019 *Evolution* **10**: 304–318.

1020 Sundaram V, Wysocka J. 2020. Transposable elements as a potent source of diverse cis-regulatory  
1021 sequences in mammalian genomes. *Philosophical Transactions of the Royal Society B:*  
1022 *Biological Sciences* **375**: 20190347.

1023 Tao Y-T, Suo F, Tusso S, Wang Y-K, Huang S, Wolf JBW, Du L-L. 2019. Intraspecific Diversity of  
1024 Fission Yeast Mitochondrial Genomes. *Genome Biol Evol* **11**: 2312–2329.

1025 Taylor DJ, Hebert PD. 1993. Habitat-dependent hybrid parentage and differential introgression  
1026 between neighboringly sympatric *Daphnia* species. *Proceedings of the National Academy of*  
1027 *Sciences* **90**: 7079–7083.

1028 Teresa Avelar A, Perfeito L, Gordo I, Godinho Ferreira M. 2013. Genome architecture is a selectable  
1029 trait that can be maintained by antagonistic pleiotropy. *Nat Commun* **4**: 2235.

1030 The Heliconius Genome Consortium, Dasmahapatra KK, Walters JR, Briscoe AD, Davey JW,  
1031 Whibley A, Nadeau NJ, Zimin AV, Hughes DST, Ferguson LC, et al. 2012. Butterfly genome  
1032 reveals promiscuous exchange of mimicry adaptations among species. *Nature* **487**: 94–98.

1033 Tollis M, Boissinot S. 2013. Lizards and LINEs: Selection and Demography Affect the Fate of L1  
1034 Retrotransposons in the Genome of the Green Anole (*Anolis carolinensis*). *Genome Biology*  
1035 *and Evolution* **5**: 1754–1768.

1036 Trizzino M, Park Y, Holsbach-Beltrame M, Aracena K, Mika K, Caliskan M, Perry GH, Lynch VJ,  
1037 Brown CD. 2017. Transposable elements are the primary source of novelty in primate gene  
1038 regulation. *Genome Res* **27**: 1623–1633.

1039 Turner LM, White MA, Tautz D, Payseur BA. 2014. Genomic Networks of Hybrid Sterility. *PLOS*  
1040 *Genetics* **10**: e1004162.

1041 Tusso S, Nieuwenhuis BPS, Sedlazeck FJ, Davey JW, Jeffares DC, Wolf JBW. 2019. Ancestral  
1042 Admixture Is the Main Determinant of Global Biodiversity in Fission Yeast. *Mol Biol Evol*  
1043 **36**: 1975–1989.



1044 Ungerer MC, Kawakami T. 2013. Transcriptional Dynamics of LTR Retrotransposons in Early  
1045 Generation and Ancient Sunflower Hybrids. *Genome Biology and Evolution* **5**: 329–337.

1046 Ungerer MC, Strakosh SC, Stimpson KM. 2009. Proliferation of Ty3/gypsy-like retrotransposons in  
1047 hybrid sunflower taxa inferred from phylogenetic data. *BMC Biol* **7**: 40.

1048 Ungerer MC, Strakosh SC, Zhen Y. 2006. Genome expansion in three hybrid sunflower species is  
1049 associated with retrotransposon proliferation. *Current Biology* **16**: R872–R873.

1050 Van Valen L. 1973. A new evolutionary law. *Evolutionary Theory* **1**: 1–30.

1051 Vela D, Fontdevila A, Vieira C, Guerreiro MPG. 2014. A Genome-Wide Survey of Genetic Instability  
1052 by Transposition in Drosophila Hybrids. *PLOS ONE* **9**: e88992.

1053 Vieira C, Lepetit D, Dumont S, Biémont C. 1999. Wake up of transposable elements following  
1054 Drosophila simulans worldwide colonization. *Molecular Biology and Evolution* **16**: 1251–  
1055 1255.

1056 Villanueva-Cañas JL, Rech GE, de Cara MAR, González J. 2017. Beyond SNPs: how to detect  
1057 selection on transposable element insertions ed. J. Kelley. *Methods in Ecology and Evolution*  
1058 **8**: 728–737.

1059 Wood V, Gwilliam R, Rajandream M-A, Lyne M, Lyne R, Stewart A, Sgouros J, Peat N, Hayles J,  
1060 Baker S, et al. 2002. The genome sequence of Schizosaccharomyces pombe. *Nature* **415**:  
1061 871–880.

1062 Xu Z, Wang H. 2007. LTR\_FINDER: an efficient tool for the prediction of full-length LTR  
1063 retrotransposons. *Nucleic Acids Research* **35**: W265–W268.

1064 Xue AT, Ruggiero RP, Hickerson MJ, Boissinot S. 2018. Differential Effect of Selection against  
1065 LINE Retrotransposons among Vertebrates Inferred from Whole-Genome Data and  
1066 Demographic Modeling. *Genome Biology and Evolution* **10**: 1265–1281.

1067 Yu G, Smith DK, Zhu H, Guan Y, Lam TT-Y. 2017. ggtree: an r package for visualization and  
1068 annotation of phylogenetic trees with their covariates and other associated data. *Methods in*  
1069 *Ecology and Evolution* **8**: 28–36.

1070 Zanders SE, Eickbush MT, Yu JS, Kang J-W, Fowler KR, Smith GR, Malik HS. 2014. Genome  
1071 rearrangements and pervasive meiotic drive cause hybrid infertility in fission yeast. *eLife* **3**.  
1072 <https://elifesciences.org/articles/02630> (Accessed July 26, 2018).

1073 Zeng L, Kortschak RD, Raison JM, Bertozzi T, Adelson DL. 2018. Superior ab initio identification,  
1074 annotation and characterisation of TEs and segmental duplications from genome assemblies.  
1075 *PLOS ONE* **13**: e0193588.

1076 Zheng X, Levine D, Shen J, Gogarten SM, Laurie C, Weir BS. 2012. A high-performance computing  
1077 toolset for relatedness and principal component analysis of SNP data. *Bioinformatics* **28**:  
1078 3326–3328.

1079
