# Supplementary material for: Reactivation of transposable elements following hybridization in fission yeast
Source: bioRxiv preprint, doi:10.1101/2021.08.02.454278, version 2 (2021-12-06)
Supplement: Supplementary Tables [file 454278_file02.xlsx]

## Sheet: S1_SampleInformation
#Supplementary Table S1. Strains used in this study.
Table edited from Jeffares et al. Nature Genetics 47 (3), 235-241 (2015).
Strain name	Other strain ids	EBC ID	DY ID	location collected	continent collected	substrate	date collected	strain verified by genotyping as
JB864	NOTT28*;ATCC24751;CBS10391;NCYC132	EBC89	DY566	Africa	Africa	African Millet Beer	1921	NCYC132;CBS356;AWRI141
JB929	NOTT93;CBS1063;DBVPG6450;NRRLY-1362	EBC112	DY44512	ND	ND	cane sugar molasses	1934	CBS1063
JB22	Leupolds 972;CBS10395;NCYC1430	EBC2	DY38751	France	Europe	rotten grapes	1947
JB918	NOTT82;CBS1059	EBC111		Mauritius	Other	cane sugar	1949
JB872	NOTT36;CBS2775;IFO0347;NBRC0347;NCYC3418;NBRP25280;JCM21876	EBC94		Japan	Asia	fermenting molasses	1957	NBRC0347
JB879	NOTT43;DBVPG2805	EBC99	DY43661	Malta	Europe	wine	1963	DBVPG2805
JB873	NOTT37;CBS5680;DBVPG6448;NCYC3422	EBC95	DY43882	Poland	Europe	apple	1965	NCYC3422
JB874	NOTT38;CBS5682;DBVPG6376;NCYC3421	EBC96	DY44511	South Africa	Africa	millet beer	1965
JB760	NOTT50;DBVPG2812	EBC74	DY43664	Italy (Sicily)	Europe	grape must treated with SO2	1966	DBVPG2812
JB1110	YHL266;Zimmer1987_0209;NBRP25289	EBC121		ND	ND	red current jelly	1977
JB758	NOTT30;NCYC936;CBS10394	EBC73	DY44518	Sri Lanka	Asia	fermenting toddy	1979	NCYC936
JB1197	NBRC0340;NOTT159;AJ14275;IFO0340;JCM1846;NBRP25282;JCM1846	EBC135		ND	ND	ND	1983	NBRC0340
JB837	NOTT1;UWOPS92.229.4	EBC77	DY42495	Mexico	Americas	Tequilla	1992
JB842	NOTT6;UFMGA602;CBS10460	EBC80		Brazil (Belo Horizonte)	Americas	must of Brazilian cachaça	1996	CBS10460
JB853	NOTT17;UFMGA1000;CBS10465	EBC85		Brazil (Belo Horizonte)	Americas	must of Brazilian cachaça	1996
JB858	NOTT22;UFMGA738;CBS10464	EBC87		Brazil (Belo Horizonte)	Americas	must of Brazilian cachaça	1996	CBS10464
JB840	NOTT4;UFMGR435;CBS10458	EBC78	DY44515	Brazil (Aracaju)	Americas	frozen pulp of Eugenia uniflora ("pitanga", Myrtaceae)	1999
JB854	NOTT18;UFMGR427;CBS10474	EBC86	DY44516	Brazil (Aracaju)	Americas	frozen pulp of Eugenia uniflora ("pitanga", Myrtaceae)	1999	CBS10474
JB953	PHAFF65-116	EBC124	DY42500	Australia	Australia	exudate of a Eucalyptus? Tree	ND
JB934	CLIB837	EBC115		France	Europe	winemaking	ND
JB938	CLIB841	EBC118	DY38761	France	Europe	winemaking	ND
JB943	CLIB846	EBC122	DY44517	France	Europe	winemaking	ND
JB1180	Kambucha_YFS276;NOTT132	EBC134	DY38515	ND	ND	ND	ND
JB1205	NBRC10568;NOTT167	EBC137		ND	ND	ND	ND
JB1206	NBRC10569;NOTT168	EBC138	DY42586	ND	ND	ND	ND
JB900	NOTT64;Y831	EBC131, EBC132		South Africa	Africa	industrial glucose	ND
JB869	NOTT33;Y0036;CBS10498	EBC91	DY42581	South Africa	Africa	wine	ND	CBS10498
JB4	CBS5557;CCY44-6-1;CBS10393;DBVPG6275;JCM8262;NBRC1608;NCYC683	EBC69	DY9971	Spain	Europe	Listan grapes	ND
JB939	CLIB842	EBC119		Spain	Europe	winemaking	ND	DBVPG2801
DY34373			DY34373	China	Asia
DY39827			DY39827	China	Asia

## Sheet: S2_GenomesStatistics
#Supplementary Table S2. De-novo Genome Statistics
Strain ID	EBC ID	DY ID	JB ID	Laboratory	Average PacBio read length	Max PacBio read length	# contigs (>= 0 bp)	# contigs (>= 1000 bp)	# contigs (>= 5000 bp)	# contigs (>= 10000 bp)	# contigs (>= 25000 bp)	# contigs (>= 50000 bp)	Total length (>= 0 bp)	Total length (>= 1000 bp)	Total length (>= 5000 bp)	Total length (>= 10000 bp)	Total length (>= 25000 bp)	Total length (>= 50000 bp)	# contigs	Largest contig	Total length	Reference length	GC (%)	Reference GC (%)	N50	NG50	N75	NG75	L50	LG50	L75	LG75	# misassemblies	# misassembled contigs	Misassembled contigs length	# local misassemblies	# scaffold gap ext. mis.	# scaffold gap loc. mis.	# unaligned mis. contigs	# unaligned contigs	Unaligned length	Genome fraction (%)	Duplication ratio	# N's per 100 kbp	# mismatches per 100 kbp	# indels per 100 kbp	# genomic features	Largest alignment	Total aligned length
DY34373		DY34373		DuLab	10113	78112	18	18	16	13	8	6	12443691	12443691	12436815	12412360	12321312	12254167	18	4472994	12443691	12631379	36.09	36.04	3659061	3659061	1679226	1679226	2	2	3	3	90	8	12200116	208	0	0	4	5 + 13 part	444939	94.587	1.004	0	676.57	113.53	39650 + 540 part	2293048	11983742
DY39827		DY39827		DuLab	10270	85208	21	21	17	11	6	6	12466060	12466060	12449044	12407705	12317483	12317483	21	3766585	12466060	12631379	36.1	36.04	2875095	2875095	1620965	1620965	2	2	4	4	87	9	12350897	195	0	0	4	5 + 13 part	373152	95.383	1.004	0	671.04	98.25	39911 + 505 part	2270014	12078048
JB1110_EBC121	EBC121		JB1110	WolfLab	8173	45234	18	18	18	18	15	8	13099825	13099825	13099825	13099825	13040233	12787799	18	3003233	13099825	12631379	35.99	36.04	1736789	1736789	1365568	1365568	3	3	5	5	211	16	13043660	154	0	0	1	0 + 12 part	225729	98.224	1.038	0	417.72	68.17	40677 + 404 part	785453	12852390
JB1180		DY38515	JB1180	DuLab	12145	44842	53	53	53	49	39	29	13548845	13548845	13548845	13514867	13291784	12955279	53	1518077	13548845	12631379	35.98	36.04	639683	770969	377809	402109	7	6	14	12	296	46	13326357	311	0	0	1	0 + 31 part	321569	97.846	1.07	0	615.67	166.36	40358 + 604 part	532250	13198927
JB1197_EBC135	EBC135		JB1197	WolfLab	7727	41244	14	14	14	14	11	9	12805727	12805727	12805727	12805727	12740839	12668699	14	3499472	12805727	12631379	36.06	36.04	2959410	2959410	1625901	1625901	2	2	4	4	184	12	12757160	218	0	0	1	0 + 13 part	300199	96.802	1.023	0	681.76	96.13	40265 + 531 part	1302697	12490861
JB1205_EBC137	EBC137		JB1205	WolfLab	9043	47651	12	12	12	12	10	8	12807115	12807115	12807115	12807115	12759872	12677779	12	3508820	12807115	12631379	36.06	36.04	2123760	2123760	1718247	1718247	3	3	4	4	140	10	12698245	240	0	0	2	0 + 8 part	437207	95.637	1.024	0	644.68	95.23	39924 + 508 part	2293302	12353166
JB1206		DY42586	JB1206	DuLab	9233	65638	9	9	8	8	8	6	12879995	12879995	12877153	12877153	12877153	12821178	9	5301424	12879995	12631379	36.05	36.04	4239190	4239190	2596955	4239190	2	2	3	2	139	6	12821178	266	0	0	2	1 + 7 part	485225	95.742	1.025	0	664.88	106.59	39887 + 543 part	1398828	12332766
JB1206_EBC138	EBC138		JB1206	WolfLab	8575	46725	14	14	14	14	13	10	12855175	12855175	12855175	12855175	12832746	12741406	14	3504446	12855175	12631379	36.06	36.04	1729429	1729429	1596237	1596237	3	3	5	5	130	11	12724002	261	0	0	3	0 + 11 part	469942	95.693	1.025	0	674.46	101.45	39900 + 549 part	2294028	12338940
JB22		DY38751	JB22	DuLab	8328	51692	29	29	26	18	13	13	12408604	12408604	12394030	12336572	12269929	12269929	29	2688260	12408604	12631379	36.08	36.04	1309054	1309054	897136	897136	3	3	6	6	17	11	7266508	12	0	0	2	2 + 9 part	46009	97.504	1.004	0	10.99	34.83	40880 + 130 part	2468768	12350005
JB22_EBC2	EBC2		JB22	WolfLab	8270	46939	11	11	11	11	11	6	12755633	12755633	12755633	12755633	12755633	12550046	11	5558532	12755633	12631379	36.03	36.04	2885061	2885061	1624608	1624608	2	2	3	3	19	8	8756393	12	0	0	0	0 + 4 part	10106	99.413	1.015	0	6.85	5.34	41454 + 37 part	2892771	12719920
JB4		DY9971	JB4	DuLab	7370	41849	23	23	14	10	7	6	12777647	12777647	12756458	12726769	12676141	12639498	23	3799246	12777647	12631379	36.09	36.04	3107245	3107245	1559613	1559613	2	2	4	4	101	10	12723560	117	0	0	0	13 + 8 part	211074	98.165	1.013	0	368.09	61.31	40820 + 269 part	2029143	12547793
JB4_EBC069	EBC069		JB4	WolfLab	8448	51017	10	10	10	10	10	7	12747577	12747577	12747577	12747577	12747577	12661167	10	5516493	12747577	12631379	36.05	36.04	4540496	4540496	4540496	4540496	2	2	2	2	94	10	12747577	114	0	0	0	0 + 8 part	159849	98.15	1.015	0	363.94	60.8	40789 + 279 part	2029907	12570750
JB758		DY44518	JB758	DuLab	10253	101072	20	20	20	19	11	8	12763055	12763055	12763055	12754300	12633621	12515577	20	3756796	12763055	12631379	36.03	36.04	1779499	1779499	1059577	1059577	3	3	5	5	197	12	12649018	242	0	0	1	4 + 15 part	337491	96.565	1.019	0	721.79	105.65	40086 + 591 part	1361339	12410201
JB760		DY43664	JB760	DuLab	4196	44236	60	60	55	37	31	27	12480547	12480547	12459103	12330365	12244598	12104353	60	1428379	12480547	12631379	36.06	36.04	546800	546800	404206	404206	8	8	14	14	53	24	8981800	40	0	0	2	6 + 24 part	129122	97.087	1.007	0	45.02	34.77	40615 + 317 part	1300129	12344163
JB760_EBC074	EBC074		JB760	WolfLab	8023	44162	19	19	19	19	17	10	12776331	12776331	12776331	12776331	12745601	12522942	19	3783435	12776331	12631379	36.04	36.04	2866689	2866689	1519967	1519967	2	2	4	4	52	15	12559303	19	0	0	0	0 + 5 part	12638	98.966	1.021	0	36.56	13.85	41265 + 115 part	2369966	12756859
JB837		DY42495	JB837	DuLab	9589	50927	12	12	11	11	9	4	12842391	12842391	12837738	12837738	12799534	12609236	12	4554382	12842391	12631379	36.05	36.04	3817851	3817851	2426334	2426334	2	2	3	3	154	11	12811645	224	0	0	0	0 + 10 part	266365	97.12	1.025	0	685.95	120.1	40310 + 509 part	1152185	12566820
JB840		DY44515	JB840	DuLab	10360	73432	23	23	23	19	11	8	12531111	12531111	12531111	12505548	12382371	12298706	23	3743645	12531111	12631379	36.05	36.04	1692422	1692422	1302356	1302356	3	3	5	5	107	11	12372850	141	0	0	1	3 + 19 part	289142	96.155	1.008	0	491.61	74.59	40224 + 357 part	1364202	12227512
JB842_EBC080	EBC080		JB842	WolfLab	8611	48600	15	15	15	15	15	10	13019544	13019544	13019544	13019544	13019544	12850702	15	3492384	13019544	12631379	36.04	36.04	1629373	2956829	1227615	1227615	3	2	5	5	213	15	13019544	174	0	0	0	0 + 11 part	234229	97.522	1.038	0	528.34	83.93	40485 + 417 part	598826	12774940
JB853_EBC085	EBC085		JB853	WolfLab	8327	46569	18	18	18	18	14	9	12814701	12814701	12814701	12814701	12737443	12559165	18	3799420	12814701	12631379	36.02	36.04	2887683	2887683	1519972	1519972	2	2	4	4	145	16	12659089	148	0	0	1	0 + 11 part	200198	97.215	1.027	0	564.95	87.02	40430 + 440 part	1068066	12600446
JB854		DY44516	JB854	DuLab	10147	70756	22	22	22	18	11	9	12457057	12457057	12457057	12430091	12328646	12260962	22	2437820	12457057	12631379	36.11	36.04	1710662	1710662	1318699	1318699	3	3	5	5	95	14	12332941	129	0	0	1	3 + 15 part	238388	96.259	1.005	0	506.28	110.33	40263 + 385 part	1928055	12197995
JB858_EBC087	EBC087		JB858	WolfLab	8607	44563	22	22	22	22	20	10	13000528	13000528	13000528	13000528	12955793	12635262	22	3718112	13000528	12631379	36.02	36.04	1333533	1333533	1195687	1195687	3	3	5	5	171	21	12978568	188	0	0	0	0 + 13 part	240024	97.387	1.037	0	538.97	87.42	40493 + 388 part	1115104	12748055
JB864		DY566	JB864	DuLab	5717	81841	98	98	89	45	21	16	13168217	13168217	13127307	12830849	12481535	12301439	98	2802381	13168217	12631379	36.67	36.04	1191483	1294084	750175	750175	4	3	7	7	80	20	10438631	184	0	0	10	57 + 27 part	1022954	95.429	1.008	0	699.54	157.56	39972 + 484 part	2276368	12134851
JB869		DY42581	JB869	DuLab	8732	57050	12	12	11	11	10	9	12727902	12727902	12725351	12725351	12714713	12687688	12	5528549	12727902	12631379	36.04	36.04	2253180	2253180	1833563	1833563	2	2	3	3	55	11	12725351	36	0	0	0	1 + 7 part	89031	98.297	1.018	0	49.67	38.83	41012 + 145 part	1423079	12611484
JB872_EBC094	EBC094		JB872	WolfLab	8039	50733	13	13	13	12	12	10	12858330	12858330	12858330	12849252	12849252	12777179	13	3575357	12858330	12631379	36.03	36.04	2975826	2975826	1116857	1320132	2	2	5	4	180	12	12849252	192	0	0	0	0 + 10 part	206847	97.895	1.023	0	549.56	84	40572 + 453 part	800054	12593132
JB873		DY43882	JB873	DuLab	4128	52647	60	60	58	47	40	37	12484411	12484411	12475502	12402547	12291415	12170288	60	1419846	12484411	12631379	36.09	36.04	360453	360453	251151	251151	9	9	19	19	129	33	10173222	114	0	0	5	2 + 32 part	273617	95.564	1.012	0	383.22	74.39	39872 + 544 part	857556	12194667
JB873_EBC095	EBC095		JB873	WolfLab	8466	50225	18	18	18	18	15	8	12981888	12981888	12981888	12981888	12922299	12677291	18	3840617	12981888	12631379	36.01	36.04	2959838	2959838	1553718	1553718	2	2	4	4	172	17	12963297	160	0	0	0	0 + 14 part	209348	97.775	1.034	0	436.12	74.39	40624 + 359 part	859732	12748296
JB874		DY44511	JB874	DuLab	10608	92764	15	15	14	8	7	7	12724607	12724607	12720038	12675787	12665653	12665653	15	3878098	12724607	12631379	36.04	36.04	2909125	2909125	1605417	1605417	2	2	4	4	180	8	12674619	181	0	0	0	3 + 9 part	281201	96.853	1.017	0	574.63	93.69	40272 + 495 part	1004618	12412094
JB879		DY43661	JB879	DuLab	3901	77637	84	84	84	79	63	52	12416792	12416792	12416792	12381887	12130459	11749241	84	765160	12416792	12631379	36.02	36.04	291936	253664	172541	148432	15	16	29	31	43	25	5133082	56	0	0	1	3 + 40 part	171377	96.362	1.006	0	54.59	60.33	40160 + 567 part	579739	12225692
JB900_EBC131	EBC131		JB900	WolfLab	8422	43879	13	13	13	13	13	8	13149502	13149502	13149502	13149502	13149502	12991727	13	5570665	13149502	12631379	35.97	36.04	3002177	3002177	1641194	1641194	2	2	3	3	236	11	13036253	184	0	0	1	0 + 12 part	298103	97.898	1.039	0	519.85	77.58	40575 + 461 part	625348	12819287
JB900_EBC132	EBC132		JB900	WolfLab	8301	43575	9	9	9	9	9	7	13137004	13137004	13137004	13137004	13137004	13067005	9	5697567	13137004	12631379	35.97	36.04	3537206	3537206	1160245	1160245	2	2	3	3	242	8	13110223	191	0	0	0	0 + 7 part	304021	97.918	1.038	0	523.21	76.37	40581 + 465 part	625342	12820875
JB918_EBC111	EBC111		JB918	WolfLab	9066	44565	11	11	11	11	11	7	13122610	13122610	13122610	13122610	13122610	12961469	11	5037141	13122610	12631379	35.99	36.04	3561826	3561826	1722376	1722376	2	2	3	3	221	9	12976407	154	0	0	1	0 + 10 part	265008	98.374	1.035	0	400.71	64.02	40765 + 403 part	843189	12846140
JB929		DY44512	JB929	DuLab	9945	103468	37	37	36	25	16	13	12692014	12692014	12688810	12611258	12468720	12376707	37	2506859	12692014	12631379	35.97	36.04	1452306	1452306	645461	645461	4	4	7	7	158	20	12490848	130	0	0	4	9 + 23 part	367883	96.138	1.015	0	426.49	88.17	40156 + 444 part	870170	12305224
JB934_EBC115	EBC115		JB934	WolfLab	6718	45159	16	16	16	16	14	9	12658211	12658211	12658211	12658211	12624014	12460934	16	3659846	12658211	12631379	36.03	36.04	1977477	1977477	1863570	1863570	3	3	4	4	107	13	12593087	130	0	0	0	1 + 8 part	187917	97.185	1.016	0	403.39	63.89	40556 + 302 part	1657842	12441757
JB938		DY38761	JB938	DuLab	6512	49044	90	90	33	28	23	20	12916423	12916423	12807456	12776188	12681301	12563652	90	1761541	12916423	12631379	36.08	36.04	1093722	1355418	452972	549530	5	4	9	8	45	21	10745769	43	0	0	0	58 + 7 part	166181	98.421	1.026	0	46.08	26.68	41086 + 180 part	1721636	12732753
JB939_EBC119	EBC119		JB939	WolfLab	7900	43596	10	10	10	10	8	7	12629480	12629480	12629480	12629480	12582838	12555491	10	3699815	12629480	12631379	36.1	36.04	2909752	2909752	1679471	1679471	2	2	4	4	85	10	12629480	168	0	0	0	0 + 6 part	158304	97.023	1.018	0	574.15	90.09	40488 + 355 part	2323965	12439305
JB943		DY44517	JB943	DuLab	10033	78293	30	30	26	15	8	8	12933224	12933224	12920087	12836720	12743729	12743729	30	3867105	12933224	12631379	35.9	36.04	2926182	2926182	1337369	1337369	2	2	4	4	269	10	12715661	160	0	0	7	7 + 20 part	375094	96.906	1.026	0	447.66	69.09	40334 + 464 part	969036	12544700
JB953		DY42500	JB953	DuLab	8718	49716	15	15	13	9	6	6	12475305	12475305	12465990	12435386	12393039	12393039	15	8607425	12475305	12631379	36.06	36.04	8607425	8607425	1387857	1387857	1	1	2	2	149	8	12348278	187	0	0	4	2 + 12 part	322387	95.031	1.012	0	675.74	109.45	39507 + 508 part	1302526	12139796
[truncated: 8 more columns]

## Sheet: S3_TEList
#Supplementary Table S3. List of transposable elements found per sample
Sequence ID	Sample ID	Chromosome	Start Position	Distan to Breaking point	Length of sequence	Direction	Cluster ID	Flanking Ancetral Haplotype
86_JB22_EBC2_J_S_08_II_I_37712_37752	JB22_EBC2	I	13233	0	40	+	7	Sp
53_JB4_J_1_I_3780641_3780681	JB4	I	13233	0	40	+	7	Sp
156_JB4_EBC069_J_S_08_I_5496444_5496484	JB4_EBC069	I	13233	0	40	+	7	Sp
44_JB760_J_13_I_II_22466_22506	JB760	I	13224	10	40	+	7	Sp
95_JB760_EBC074_J_S_12_II_I_46786_46826	JB760_EBC074	I	13233	0	40	+	7	Sp
133_JB872_EBC094_J_S_08_I_16474_16514	JB872_EBC094	I	13224	10	40	+	7	Sp
43_JB879_J_26_II_I_13806_13846	JB879	I	13233	0	40	+	7	Sp
183_JB938_J_75_I_II_22206_22246	JB938	I	13224	10	40	+	7	Sp
1_JB939_EBC119_J_S_00_I_23969_24009	JB939_EBC119	I	13224	10	40	+	7	Sp
2_JB939_EBC119_J_S_00_I_27656_27696	JB939_EBC119	I	13224	10	40	+	7	Sp
60_JB1174_EBC132_J_S_00_I_20512_20753	JB1174_EBC132	I	21339	310	241	+	9	Sp
61_JB1174_EBC132_J_S_00_I_20755_21055	JB1174_EBC132	I	21341	10	300	+	9	Sp
85_JB22_EBC2_J_S_08_II_I_29641_29919	JB22_EBC2	I	20790	260	278	+	9	Sp
87_JB22_EBC2_J_S_10_II_10223_10501	JB22_EBC2	I	20791	260	278	+	9	Sp
88_JB22_EBC2_J_S_10_II_13463_13596	JB22_EBC2	I	24082	230	133	-	9	Sp
84_JB22_EBC2_J_S_08_II_I_26525_26658	JB22_EBC2	I	24091	220	133	-	9	Sp
89_JB22_EBC2_J_S_10_II_13700_13962	JB22_EBC2	I	24539	10	262	+	9	Sp
83_JB22_EBC2_J_S_08_II_I_26159_26421	JB22_EBC2	I	24548	0	262	+	9	Sp
55_JB4_J_2_II_15226_15432	JB4	I	20574	1810	206	+	9	Sp
52_JB4_J_1_I_3772548_3772826	JB4	I	20790	260	278	+	9	Sp
54_JB4_J_2_II_2179_2453	JB4	I	20798	250	274	+	9	Sp
51_JB4_J_1_I_3769432_3769565	JB4	I	24091	220	133	-	9	Sp
50_JB4_J_1_I_3769066_3769328	JB4	I	24548	0	262	+	9	Sp
155_JB4_EBC069_J_S_08_I_5488350_5488628	JB4_EBC069	I	20790	260	278	+	9	Sp
154_JB4_EBC069_J_S_08_I_5485234_5485367	JB4_EBC069	I	24091	220	133	-	9	Sp
153_JB4_EBC069_J_S_08_I_5484868_5485130	JB4_EBC069	I	24548	0	262	+	9	Sp
45_JB760_J_13_I_II_30284_30562	JB760	I	20791	260	278	+	9	Sp
46_JB760_J_13_I_II_33524_33658	JB760	I	24082	230	134	-	9	Sp
47_JB760_J_13_I_II_33762_34024	JB760	I	24539	10	262	+	9	Sp
94_JB760_EBC074_J_S_12_II_I_38726_39004	JB760_EBC074	I	20790	260	278	+	9	Sp
93_JB760_EBC074_J_S_12_II_I_35690_35823	JB760_EBC074	I	24091	220	133	-	9	Sp
92_JB760_EBC074_J_S_12_II_I_35324_35586	JB760_EBC074	I	24548	0	262	+	9	Sp
121_JB853_EBC085_J_S_07_16688_16966	JB853_EBC085	I	20790	260	278	+	9	Sp
123_JB853_EBC085_J_S_08_II_5207_5485	JB853_EBC085	I	20790	260	278	+	9	Sp
120_JB853_EBC085_J_S_07_13616_13749	JB853_EBC085	I	24091	220	133	-	9	Sp
122_JB853_EBC085_J_S_08_II_2134_2269	JB853_EBC085	I	24091	220	135	-	9	Sp
114_JB858_EBC087_J_S_13_I_II_962_1238	JB858_EBC087	I	20799	250	276	+	9	NA
67_JB869_J_2_I_41749_42027	JB869	I	20791	260	278	+	9	Sp
68_JB869_J_2_I_45009_45142	JB869	I	24082	230	133	-	9	Sp
69_JB869_J_2_I_45246_45508	JB869	I	24539	10	262	+	9	Sp
134_JB872_EBC094_J_S_08_I_24298_24576	JB872_EBC094	I	20791	260	278	+	9	Sp
135_JB872_EBC094_J_S_08_I_27559_27692	JB872_EBC094	I	24082	230	133	-	9	Sp
136_JB872_EBC094_J_S_08_I_27796_28058	JB872_EBC094	I	24539	10	262	+	9	Sp
200_JB873_J_56_II_5425_5703	JB873	I	20790	260	278	+	9	NA
JB873_EBC095_405_plus_len4950	JB873_EBC095	I	19695	2280	4950	+	9	NA
150_JB874_J_1_I_10811_11089	JB874	I	20791	260	278	+	9	Sp
151_JB874_J_1_I_14073_14206	JB874	I	24082	230	133	-	9	Sp
152_JB874_J_1_I_14310_14572	JB874	I	24539	10	262	+	9	Sp
42_JB879_J_26_II_I_5712_5990	JB879	I	20790	260	278	+	9	Sp
41_JB879_J_26_II_I_2618_2751	JB879	I	24091	220	133	-	9	Sp
40_JB879_J_26_II_I_2252_2514	JB879	I	24548	0	262	+	9	Sp
191_JB900_EBC131_J_S_420_20661_20902	JB900_EBC131	I	21339	310	241	+	9	Sp
192_JB900_EBC131_J_S_420_20904_21204	JB900_EBC131	I	21341	10	300	+	9	Sp
3_JB939_EBC119_J_S_00_I_35506_35784	JB939_EBC119	I	20791	260	278	+	9	NA
145_JB943_J_11_I_3840365_3840643	JB943	I	20790	260	278	+	9	Sp
144_JB943_J_11_I_3837329_3837462	JB943	I	24091	220	133	-	9	Sp
143_JB943_J_11_I_3835487_3837217	JB943	I	24546	10	1730	+	9	Sp
JB943_222_comp_len3158	JB943	I	24546	1790	3158	.	9	Sp
142_JB943_J_11_I_3835315_3835485	JB943	I	24548	1740	170	-	9	Sp
25_DY34373_L_11_10078_10488	DY34373	I	26680	2330	410	+	10	Sp
26_DY34373_L_11_14599_14681	DY34373	I	27338	1150	82	-	10	Sp
2_DY39827_L_11_7396_7806	DY39827	I	25796	1990	410	+	10	Sp
47_JB1110_EBC121_J_S_00_25146_25563	JB1110_EBC121	I	26680	2280	417	+	10	Sp
50_JB1205_EBC137_J_S_12_82108_82457	JB1205_EBC137	I	25178	410	349	-	10	Sk
42_JB1205_EBC137_J_S_12_30725_31080	JB1205_EBC137	I	25183	420	355	-	10	Sk
52_JB1205_EBC137_J_S_13_I_10108_10463	JB1205_EBC137	I	25183	420	355	+	10	Sk
51_JB1205_EBC137_J_S_12_83223_83887	JB1205_EBC137	I	25306	230	664	+	10	Sk
132_JB1205_EBC137_J_S_20_II_29413_29824	JB1205_EBC137	I	25794	1990	411	+	10	Sk
197_JB1206_J_5_I_III_5232564_5232919	JB1206	I	25180	420	355	+	10	Sk
199_JB1206_J_5_I_III_5256865_5257220	JB1206	I	25180	420	355	+	10	Sk
201_JB1206_J_5_I_III_5281161_5281516	JB1206	I	25180	420	355	+	10	Sk
206_JB1206_J_6_17592_17947	JB1206	I	25267	500	355	-	10	Sk
9_JB1206_J_0_II_42493_42904	JB1206	I	25794	1990	411	+	10	Sk
79_JB1206_EBC138_J_S_04_15878_16233	JB1206_EBC138	I	25180	420	355	+	10	Sk
200_JB1206_EBC138_J_S_18_I_1716565_1716920	JB1206_EBC138	I	25180	420	355	+	10	Sk
202_JB1206_EBC138_J_S_19_3695_4050	JB1206_EBC138	I	25181	420	355	+	10	Sk
204_JB1206_EBC138_J_S_19_28003_28358	JB1206_EBC138	I	25264	500	355	+	10	Sk
90_JB22_EBC2_J_S_10_II_15336_15507	JB22_EBC2	I	26175	10	171	-	10	Sp
82_JB22_EBC2_J_S_08_II_I_24614_24785	JB22_EBC2	I	26184	0	171	-	10	Sp
91_JB22_EBC2_J_S_10_II_17280_17627	JB22_EBC2	I	28123	10	347	-	10	Sp
81_JB22_EBC2_J_S_08_II_I_22491_22838	JB22_EBC2	I	28132	0	347	-	10	Sp
49_JB4_J_1_I_3767521_3767692	JB4	I	26184	0	171	-	10	Sp
48_JB4_J_1_I_3765400_3765747	JB4	I	28132	0	347	-	10	Sp
152_JB4_EBC069_J_S_08_I_5483323_5483494	JB4_EBC069	I	26184	0	171	-	10	Sp
151_JB4_EBC069_J_S_08_I_5481202_5481549	JB4_EBC069	I	28132	0	347	-	10	Sp
48_JB760_J_13_I_II_35398_35569	JB760	I	26185	0	171	-	10	Sp
49_JB760_J_13_I_II_37342_37689	JB760	I	28123	10	347	-	10	Sp
91_JB760_EBC074_J_S_12_II_I_33779_33950	JB760_EBC074	I	26184	0	171	-	10	Sp
86_JB760_EBC074_J_S_12_II_I_24556_24903	JB760_EBC074	I	28132	0	347	-	10	Sp
115_JB858_EBC087_J_S_14_II_21398_21813	JB858_EBC087	I	25789	1930	415	+	10	Sp
70_JB869_J_2_I_46882_47053	JB869	I	26185	0	171	-	10	Sp
71_JB869_J_2_I_48829_49176	JB869	I	28123	10	347	-	10	Sp
137_JB872_EBC094_J_S_08_I_29432_29603	JB872_EBC094	I	26175	10	171	-	10	Sp
138_JB872_EBC094_J_S_08_I_31380_31727	JB872_EBC094	I	28123	10	347	+	10	Sp
29_JB872_EBC094_J_S_08_I_38984_43899	JB872_EBC094	I	32334	1810	4915	+	10	Sp
153_JB874_J_1_I_15946_16117	JB874	I	26185	0	171	-	10	Sp
154_JB874_J_1_I_17892_18239	JB874	I	28123	10	347	+	10	Sp
24_JB874_J_1_I_25541_30456	JB874	I	32334	1810	4915	+	10	Sp
39_JB879_J_26_II_I_707_878	JB879	I	26184	0	171	-	10	Sp
163_JB900_EBC131_J_S_1613_II_I_21747_22164	JB900_EBC131	I	25661	1790	417	+	10	Sp
167_JB900_EBC131_J_S_1614_II_I_51305_51476	JB900_EBC131	I	28124	190	171	-	10	Sp
195_JB900_EBC131_J_S_420_29063_29230	JB900_EBC131	I	37343	10520	167	+	10	Sp
194_JB900_EBC131_J_S_420_26685_26781	JB900_EBC131	I	37344	12970	96	+	10	Sp
197_JB900_EBC131_J_S_420_30845_31202	JB900_EBC131	I	37345	8550	357	+	10	Sp
196_JB900_EBC131_J_S_420_30740_30832	JB900_EBC131	I	37345	8920	92	-	10	Sp
193_JB900_EBC131_J_S_420_26111_26324	JB900_EBC131	I	37347	13430	213	-	10	Sp
198_JB900_EBC131_J_S_420_41361_41700	JB900_EBC131	I	37373	1580	339	+	10	Sp
199_JB900_EBC131_J_S_420_43283_43389	JB900_EBC131	I	37375	3500	106	+	10	Sp
54_JB938_J_54_II_I_1321_1492	JB938	I	26175	10	171	-	10	Sp
55_JB938_J_54_II_I_3265_3612	JB938	I	28123	10	347	-	10	Sp
134_JB939_EBC119_J_S_09_II_1657788_1657922	JB939_EBC119	I	28063	400	134	+	10	Sp
141_JB943_J_11_I_3833739_3833910	JB943	I	26184	0	171	-	10	Sp
140_JB943_J_11_I_3831620_3831967	JB943	I	28132	0	347	-	10	Sp
27_JB953_J_10_II_34827_35244	JB953	I	36949	13200	417	+	10	Sp
45_JB1205_EBC137_J_S_12_38625_39293	JB1205_EBC137	I	39046	0	668	+	11	Sp
44_JB1205_EBC137_J_S_12_37500_37855	JB1205_EBC137	I	39048	1440	355	-	11	Sp
204_JB1206_J_5_I_III_5293271_5293939	JB1206	I	39053	10	668	-	11	Sp
63_JB1174_EBC132_J_S_00_I_26537_26633	JB1174_EBC132	I	40744	3750	96	-	12	Sp
66_JB1174_EBC132_J_S_00_I_30697_31054	JB1174_EBC132	I	40744	7910	357	-	12	Sp
65_JB1174_EBC132_J_S_00_I_30592_30684	JB1174_EBC132	I	40749	7800	92	+	12	Sp
62_JB1174_EBC132_J_S_00_I_25963_26176	JB1174_EBC132	I	40750	3170	213	+	12	Sp
64_JB1174_EBC132_J_S_00_I_28915_29082	JB1174_EBC132	I	40752	6120	167	-	12	Sp
70_JB1174_EBC132_J_S_00_I_64584_64644	JB1174_EBC132	I	41827	880	60	-	13	Sp
21_JB1174_EBC132_J_S_00_I_5653554_5658471	JB1174_EBC132	I	41849	2150	4917	-	13	Sp
20_JB1174_EBC132_J_S_00_I_5640602_5645542	JB1174_EBC132	I	44475	480	4940	+	13	Sp
203_JB837_J_8_277_317	JB837	I	41850	2780	40	+	13	Sp
166_JB837_J_6_I_13168_13208	JB837	I	41853	2810	40	-	13	Sp
118_JB853_EBC085_J_S_06_I_3794415_3794455	JB853_EBC085	I	41853	2820	40	-	13	Sp
121_JB900_EBC131_J_S_1609_II_4_2172	JB900_EBC131	I	41852	2150	2168	-	13	Sp
120_JB900_EBC131_J_S_1608_II_1_271	JB900_EBC131	I	44475	470	270	+	13	Sp
18_JB900_EBC131_J_S_1607_I_5554652_5559592	JB900_EBC131	I	44475	480	4940	+	13	Sp
119_JB900_EBC131_J_S_1607_I_5567582_5570663	JB900_EBC131	I	51973	10	3081	+	13	Sp
23_JB900_EBC131_J_S_1608_II_8278_13195	JB900_EBC131	I	51976	30	4917	+	13	Sp
30_DY34373_L_12_I_72181_72538	DY34373	I	68868	14570	357	-	14	Sk
28_DY34373_L_12_I_47749_48071	DY34373	I	69088	9320	322	-	14	Sk
29_DY34373_L_12_I_51292_51546	DY34373	I	69093	5840	254	+	14	Sk
161_DY39827_L_1_I_3725048_3725370	DY39827	I	53366	25100	322	-	14	Sk
163_DY39827_L_1_I_3749499_3749856	DY39827	I	53370	610	357	+	14	Sk
162_DY39827_L_1_I_3728591_3728845	DY39827	I	53371	21620	254	+	14	Sk
1_DY39827_L_0_4504_4529	DY39827	I	79619	1670	25	-	14	Sk
122_JB1110_EBC121_J_S_12_I_II_38218_38575	JB1110_EBC121	I	54496	0	357	-	14	Sp
48_JB1110_EBC121_J_S_05_I_II_37448_37805	JB1110_EBC121	I	54497	0	357	-	14	Sp
123_JB1110_EBC121_J_S_13_II_2338_2695	JB1110_EBC121	I	54497	0	357	-	14	Sp
49_JB1110_EBC121_J_S_05_I_II_56629_57254	JB1110_EBC121	I	73647	10	625	+	14	Sp
50_JB1110_EBC121_J_S_05_I_II_61209_61386	JB1110_EBC121	I	78098	140	177	-	14	Sp
51_JB1110_EBC121_J_S_05_I_II_62595_62831	JB1110_EBC121	I	79614	10	236	-	14	Sp
71_JB1174_EBC132_J_S_00_I_74622_74979	JB1174_EBC132	I	53491	490	357	+	14	Sp
130_JB1174_EBC132_J_S_00_I_5637725_5638082	JB1174_EBC132	I	54496	0	357	-	14	Sp
158_JB1174_EBC132_J_S_05_II_I_1124810_1125167	JB1174_EBC132	I	54496	0	357	-	14	Sp
129_JB1174_EBC132_J_S_00_I_5618278_5618903	JB1174_EBC132	I	73646	10	625	+	14	Sp
128_JB1174_EBC132_J_S_00_I_5614146_5614323	JB1174_EBC132	I	78097	140	177	-	14	Sp
127_JB1174_EBC132_J_S_00_I_5612701_5612937	JB1174_EBC132	I	79623	0	236	-	14	Sp
219_JB1180_J_68_I_II_42586_42943	JB1180	I	54497	0	357	-	14	Sp
220_JB1180_J_68_I_II_61729_62354	JB1180	I	73647	10	625	+	14	Sp
221_JB1180_J_68_I_II_66308_66485	JB1180	I	78098	140	177	-	14	Sp
222_JB1180_J_68_I_II_67691_67927	JB1180	I	79624	0	236	-	14	Sp
110_JB1197_EBC135_J_S_151_I_44855_45212	JB1197_EBC135	I	53370	610	357	+	14	Sk
112_JB1197_EBC135_J_S_151_I_69338_69660	JB1197_EBC135	I	69090	9320	322	-	14	Sk
111_JB1197_EBC135_J_S_151_I_65863_66117	JB1197_EBC135	I	69095	5840	254	+	14	Sk
193_JB1205_EBC137_J_S_23_I_III_43929_44286	JB1205_EBC137	I	53371	610	357	+	14	Sk
194_JB1205_EBC137_J_S_23_I_III_64924_65178	JB1205_EBC137	I	71858	2880	254	+	14	Sk
195_JB1205_EBC137_J_S_23_I_III_68399_68721	JB1205_EBC137	I	71863	6350	322	-	14	Sk
104_JB1206_J_2_I_III_2552760_2553117	JB1206	I	53490	490	357	+	14	Sk
102_JB1206_J_2_I_III_2528324_2528646	JB1206	I	69092	9320	322	-	14	Sk
103_JB1206_J_2_I_III_2531868_2532122	JB1206	I	69096	5840	254	+	14	Sk
30_JB1206_EBC138_J_S_02_I_III_43922_44279	JB1206_EBC138	I	53371	610	357	+	14	Sk
31_JB1206_EBC138_J_S_02_I_III_64917_65171	JB1206_EBC138	I	69087	5850	254	+	14	Sk
32_JB1206_EBC138_J_S_02_I_III_68392_68714	JB1206_EBC138	I	69092	9320	322	-	14	Sk
164_JB22_J_5_I_1229163_1229520	JB22	I	54496	0	357	-	14	Sp
163_JB22_J_5_I_1209753_1210378	JB22	I	73646	10	625	+	14	Sp
162_JB22_J_5_I_1205621_1205798	JB22	I	78097	140	177	-	14	Sp
161_JB22_J_5_I_1204176_1204412	JB22	I	79623	0	236	-	14	Sp
80_JB22_EBC2_J_S_07_I_5537608_5537965	JB22_EBC2	I	54496	0	357	-	14	Sp
79_JB22_EBC2_J_S_07_I_5518196_5518821	JB22_EBC2	I	73646	10	625	+	14	Sp
78_JB22_EBC2_J_S_07_I_5514063_5514240	JB22_EBC2	I	78097	140	177	-	14	Sp
77_JB22_EBC2_J_S_07_I_5512618_5512854	JB22_EBC2	I	79623	0	236	-	14	Sp
47_JB4_J_1_I_3742974_3743331	JB4	I	54496	0	357	-	14	Sp
46_JB4_J_1_I_3723540_3724195	JB4	I	73646	10	655	+	14	Sp
45_JB4_J_1_I_3719413_3719590	JB4	I	78097	140	177	-	14	Sp
44_JB4_J_1_I_3718011_3718228	JB4	I	79620	20	217	-	14	Sp
150_JB4_EBC069_J_S_08_I_5458774_5459131	JB4_EBC069	I	54496	0	357	-	14	Sp
149_JB4_EBC069_J_S_08_I_5439338_5439993	JB4_EBC069	I	73646	10	655	+	14	Sp
148_JB4_EBC069_J_S_08_I_5435211_5435388	JB4_EBC069	I	78097	140	177	-	14	Sp
147_JB4_EBC069_J_S_08_I_5433809_5434026	JB4_EBC069	I	79620	20	217	-	14	Sp
227_JB758_J_2_I_15118_15372	JB758	I	69087	5850	254	+	14	Sk
228_JB758_J_2_I_18588_18910	JB758	I	69087	9320	322	-	14	Sk
82_JB760_J_1_I_694967_695324	JB760	I	54496	0	357	-	14	Sp
81_JB760_J_1_I_675539_676164	JB760	I	73646	10	625	+	14	Sp
80_JB760_J_1_I_671406_671583	JB760	I	78097	140	177	-	14	Sp
79_JB760_J_1_I_669961_670197	JB760	I	79623	0	236	-	14	Sp
85_JB760_EBC074_J_S_11_I_3766838_3767195	JB760_EBC074	I	54496	0	357	-	14	Sp
84_JB760_EBC074_J_S_11_I_3747410_3748035	JB760_EBC074	I	73646	10	625	+	14	Sp
83_JB760_EBC074_J_S_11_I_3743277_3743454	JB760_EBC074	I	78097	140	177	-	14	Sp
82_JB760_EBC074_J_S_11_I_3741832_3742068	JB760_EBC074	I	79623	0	236	-	14	Sp
168_JB837_J_6_I_44527_44781	JB837	I	53368	21630	254	+	14	Sk
167_JB837_J_6_I_23510_23867	JB837	I	53371	610	357	+	14	Sk
169_JB837_J_6_I_47990_48312	JB837	I	53371	25090	322	-	14	Sk
166_JB840_J_4_I_2771_3130	JB840	I	53371	610	359	+	14	Sk
167_JB840_J_4_I_23801_24055	JB840	I	71859	2880	254	+	14	Sk
168_JB840_J_4_I_27275_27597	JB840	I	71863	6350	322	-	14	Sk
113_JB842_EBC080_J_S_10_I_100520_100775	JB842_EBC080	I	53368	21110	255	+	14	Sk
114_JB842_EBC080_J_S_10_I_120916_121273	JB842_EBC080	I	53370	610	357	+	14	Sk
112_JB842_EBC080_J_S_10_I_96976_97301	JB842_EBC080	I	53372	24580	325	-	14	Sk
116_JB853_EBC085_J_S_06_I_3763040_3763295	JB853_EBC085	I	53368	21110	255	+	14	Sk
117_JB853_EBC085_J_S_06_I_3783436_3783793	JB853_EBC085	I	53370	610	357	+	14	Sk
115_JB853_EBC085_J_S_06_I_3759496_3759820	JB853_EBC085	I	53373	24580	324	-	14	Sk
32_JB854_J_14_I_27164_27488	JB854	I	53365	24590	324	-	14	Sk
31_JB854_J_14_I_23689_23944	JB854	I	53370	21110	255	+	14	Sk
30_JB854_J_14_I_3190_3547	JB854	I	53371	610	357	+	14	Sk
120_JB858_EBC087_J_S_16_II_I_43221_43476	JB858_EBC087	I	53368	21110	255	+	14	Sk
119_JB858_EBC087_J_S_16_II_I_22724_23081	JB858_EBC087	I	53371	610	357	+	14	Sk
121_JB858_EBC087_J_S_16_II_I_46696_47020	JB858_EBC087	I	53373	24580	324	-	14	Sk
72_JB869_J_2_I_78343_78700	JB869	I	54497	0	357	-	14	Sp
73_JB869_J_2_I_97503_98128	JB869	I	73647	10	625	+	14	Sp
74_JB869_J_2_I_102082_102259	JB869	I	78098	140	177	-	14	Sp
75_JB869_J_2_I_103468_103704	JB869	I	79614	10	236	-	14	Sp
139_JB872_EBC094_J_S_08_I_66150_66507	JB872_EBC094	I	54497	0	357	-	14	Sp
140_JB872_EBC094_J_S_08_I_85315_85940	JB872_EBC094	I	73647	10	625	+	14	Sp
141_JB872_EBC094_J_S_08_I_89895_90072	JB872_EBC094	I	78098	140	177	-	14	Sp
142_JB872_EBC094_J_S_08_I_91281_91517	JB872_EBC094	I	79614	10	236	-	14	Sp
110_JB873_J_35_I_5743_6100	JB873	I	54497	0	357	-	14	Sp
111_JB873_J_35_I_24887_25512	JB873	I	73647	10	625	+	14	Sp
112_JB873_J_35_I_29467_29644	JB873	I	78098	140	177	-	14	Sp
113_JB873_J_35_I_30854_31090	JB873	I	79614	10	236	-	14	Sp
106_JB873_EBC095_J_S_08_I_3770072_3770429	JB873_EBC095	I	54496	0	357	-	14	Sp
105_JB873_EBC095_J_S_08_I_3750658_3751283	JB873_EBC095	I	73646	10	625	+	14	Sp
104_JB873_EBC095_J_S_08_I_3746526_3746703	JB873_EBC095	I	78097	140	177	-	14	Sp
103_JB873_EBC095_J_S_08_I_3745081_3745317	JB873_EBC095	I	79623	0	236	-	14	Sp
155_JB874_J_1_I_52701_53058	JB874	I	54497	0	357	-	14	Sp
156_JB874_J_1_I_71863_72488	JB874	I	73647	10	625	+	14	Sp
157_JB874_J_1_I_76443_76620	JB874	I	78098	140	177	-	14	Sp
158_JB874_J_1_I_77829_78065	JB874	I	79614	10	236	-	14	Sp
38_JB879_J_25_I_15478_15835	JB879	I	54496	0	357	-	14	Sp
178_JB879_J_68_I_30073_30747	JB879	I	73646	10	674	-	14	Sp
177_JB879_J_68_I_25972_26277	JB879	I	78096	30	305	-	14	Sp
176_JB879_J_68_I_24544_24780	JB879	I	79623	0	236	-	14	Sp
202_JB900_EBC131_J_S_420_74771_75128	JB900_EBC131	I	53371	610	357	+	14	Sp
118_JB900_EBC131_J_S_1607_I_5551775_5552132	JB900_EBC131	I	54496	0	357	-	14	Sp
166_JB900_EBC131_J_S_1614_II_I_21425_21782	JB900_EBC131	I	54496	0	357	-	14	Sp
117_JB900_EBC131_J_S_1607_I_5532326_5532951	JB900_EBC131	I	73646	10	625	+	14	Sp
116_JB900_EBC131_J_S_1607_I_5528194_5528371	JB900_EBC131	I	78097	140	177	-	14	Sp
115_JB900_EBC131_J_S_1607_I_5526749_5526985	JB900_EBC131	I	79623	0	236	-	14	Sp
87_JB918_EBC111_J_S_14_II_I_1720117_1720474	JB918_EBC111	I	54496	0	357	-	14	Sp
140_JB918_EBC111_J_S_599_II_I_21731_22088	JB918_EBC111	I	54497	0	357	-	14	Sp
85_JB918_EBC111_J_S_14_II_I_1696768_1697092	JB918_EBC111	I	64624	13270	324	+	14	Sp
86_JB918_EBC111_J_S_14_II_I_1700312_1700567	JB918_EBC111	I	64629	9790	255	+	14	Sp
141_JB918_EBC111_J_S_599_II_I_40910_41535	JB918_EBC111	I	73647	10	625	+	14	Sp
142_JB918_EBC111_J_S_599_II_I_45490_45667	JB918_EBC111	I	78098	140	177	-	14	Sp
143_JB918_EBC111_J_S_599_II_I_46876_47112	JB918_EBC111	I	79614	10	236	-	14	Sp
97_JB929_J_24_20845_21202	JB929	I	53371	610	357	+	14	Sk
87_JB929_J_14_II_6762_7119	JB929	I	54497	0	357	-	14	Sk
56_JB938_J_54_II_I_30695_31052	JB938	I	54497	0	357	-	14	Sp
57_JB938_J_54_II_I_49854_50479	JB938	I	73647	10	625	+	14	Sp
58_JB938_J_54_II_I_54433_54610	JB938	I	78098	140	177	-	14	Sp
59_JB938_J_54_II_I_55819_56055	JB938	I	79614	10	236	-	14	Sp
138_JB943_J_11_I_3783558_3783915	JB943	I	54496	0	357	-	14	Sp
137_JB943_J_11_I_3764111_3764736	JB943	I	73646	10	625	+	14	Sp
136_JB943_J_11_I_3759979_3760156	JB943	I	78097	140	177	-	14	Sp
135_JB943_J_11_I_3758534_3758770	JB943	I	79623	0	236	-	14	Sp
184_JB953_J_8_I_26072_26394	JB953	I	81406	2310	322	+	14	Sk
182_JB953_J_8_I_1586_1945	JB953	I	81407	26760	359	+	14	Sk
183_JB953_J_8_I_22597_22851	JB953	I	81413	5860	254	+	14	Sk
Pomberef_173_plus_len357	Pomberef	I	54497	0	357	+	14	Sp
Pomberef_174_comp_len228	Pomberef	I	73647	10	228	-	14	Sp
35_JB929_J_10_I_345440_345695	JB929	I	85691	10990	255	-	15	Sk
34_JB929_J_10_I_341896_342220	JB929	I	85695	7450	324	+	15	Sk
JB758_463_comp_len350	JB758	I	91741	4990	350	-	16	Sk
36_JB758_J_2_I_33679_38619	JB758	I	91746	40	4940	+	16	Sk
53_JB1110_EBC121_J_S_05_I_II_81419_81748	JB1110_EBC121	I	98572	380	329	-	17	Sp
52_JB1110_EBC121_J_S_05_I_II_81041_81413	JB1110_EBC121	I	98574	0	372	+	17	Sp
125_JB1174_EBC132_J_S_00_I_5593784_5594113	JB1174_EBC132	I	98571	380	329	-	17	Sp
126_JB1174_EBC132_J_S_00_I_5594119_5594491	JB1174_EBC132	I	98573	0	372	+	17	Sp
224_JB1180_J_68_I_II_86499_87212	JB1180	I	98572	380	713	-	17	Sp
223_JB1180_J_68_I_II_86121_86493	JB1180	I	98574	0	372	+	17	Sp
159_JB22_J_5_I_1185262_1185591	JB22	I	98571	380	329	-	17	Sp
160_JB22_J_5_I_1185597_1185969	JB22	I	98573	0	372	+	17	Sp
75_JB22_EBC2_J_S_07_I_5493703_5494032	JB22_EBC2	I	98571	380	329	-	17	Sp
76_JB22_EBC2_J_S_07_I_5494038_5494410	JB22_EBC2	I	98573	0	372	+	17	Sp
42_JB4_J_1_I_3699095_3699424	JB4	I	98571	380	329	-	17	Sp
43_JB4_J_1_I_3699430_3699802	JB4	I	98573	0	372	+	17	Sp
145_JB4_EBC069_J_S_08_I_5414893_5415222	JB4_EBC069	I	98571	380	329	-	17	Sp
146_JB4_EBC069_J_S_08_I_5415228_5415600	JB4_EBC069	I	98573	0	372	+	17	Sp
77_JB760_J_1_I_651046_651375	JB760	I	98571	380	329	-	17	Sp
78_JB760_J_1_I_651381_651753	JB760	I	98573	0	372	+	17	Sp
80_JB760_EBC074_J_S_11_I_3722917_3723246	JB760_EBC074	I	98571	380	329	-	17	Sp
81_JB760_EBC074_J_S_11_I_3723252_3723624	JB760_EBC074	I	98573	0	372	+	17	Sp
77_JB869_J_2_I_122251_122580	JB869	I	98572	380	329	-	17	Sp
76_JB869_J_2_I_121873_122245	JB869	I	98574	0	372	+	17	Sp
144_JB872_EBC094_J_S_08_I_110077_110406	JB872_EBC094	I	98572	380	329	-	17	Sp
143_JB872_EBC094_J_S_08_I_109699_110071	JB872_EBC094	I	98574	0	372	+	17	Sp
115_JB873_J_35_I_49653_49982	JB873	I	98572	380	329	-	17	Sp
114_JB873_J_35_I_49275_49647	JB873	I	98574	0	372	+	17	Sp
101_JB873_EBC095_J_S_08_I_3726191_3726520	JB873_EBC095	I	98571	380	329	-	17	Sp
102_JB873_EBC095_J_S_08_I_3726526_3726898	JB873_EBC095	I	98573	0	372	+	17	Sp
160_JB874_J_1_I_96620_96949	JB874	I	98572	380	329	-	17	Sp
159_JB874_J_1_I_96242_96614	JB874	I	98574	0	372	+	17	Sp
174_JB879_J_68_I_5630_5959	JB879	I	98571	380	329	-	17	Sp
175_JB879_J_68_I_5965_6325	JB879	I	98575	10	360	+	17	Sp
113_JB900_EBC131_J_S_1607_I_5507832_5508161	JB900_EBC131	I	98571	380	329	-	17	Sp
114_JB900_EBC131_J_S_1607_I_5508167_5508539	JB900_EBC131	I	98573	0	372	+	17	Sp
41_JB918_EBC111_J_S_599_II_I_66036_70951	JB918_EBC111	I	98568	720	4915	+	17	Sp
JB918_EBC111_303_comp_len276	JB918_EBC111	I	98572	380	276	-	17	Sp
144_JB918_EBC111_J_S_599_II_I_65322_65694	JB918_EBC111	I	98574	0	372	+	17	Sp
61_JB938_J_54_II_I_74613_74942	JB938	I	98572	380	329	-	17	Sp
60_JB938_J_54_II_I_74235_74607	JB938	I	98574	0	372	+	17	Sp
5_JB939_EBC119_J_S_00_I_61764_62093	JB939_EBC119	I	99292	10	329	-	17	Sp
133_JB943_J_11_I_3739617_3739946	JB943	I	98571	380	329	-	17	Sp
134_JB943_J_11_I_3739952_3740324	JB943	I	98573	0	372	+	17	Sp
Pomberef_176_comp_len276	Pomberef	I	98572	380	276	-	17	Sp
Pomberef_175_plus_len360	Pomberef	I	98576	10	360	+	17	Sp
12_JB1197_EBC135_J_S_151_I_90167_95454	JB1197_EBC135	I	100007	880	5287	+	18	NA
21_JB837_J_6_I_69346_74259	JB837	I	100007	5590	4913	+	19	Sk
26_JB953_J_8_I_46900_50824	JB953	I	100007	880	3924	+	20	Sk
22_JB837_J_6_I_74295_79233	JB837	I	100011	620	4938	+	21	Sk
22_JB842_EBC080_J_S_10_I_65370_70285	JB842_EBC080	I	104783	10	4915	-	22	Sk
27_DY34373_L_12_I_18423_18759	DY34373	I	106347	0	336	+	23	Sk
160_DY39827_L_1_I_3697001_3697337	DY39827	I	106347	0	336	+	23	Sk
54_JB1110_EBC121_J_S_05_I_II_88816_89185	JB1110_EBC121	I	106338	10	369	+	23	Sp
124_JB1174_EBC132_J_S_00_I_5586347_5586716	JB1174_EBC132	I	106347	0	369	+	23	Sp
225_JB1180_J_68_I_II_94250_94619	JB1180	I	106338	10	369	+	23	Sk
113_JB1197_EBC135_J_S_151_I_102659_102995	JB1197_EBC135	I	106348	0	336	+	23	Sk
196_JB1205_EBC137_J_S_23_I_III_96433_96769	JB1205_EBC137	I	106338	10	336	+	23	Sk
101_JB1206_J_2_I_III_2500280_2500616	JB1206	I	106347	0	336	+	23	Sk
33_JB1206_EBC138_J_S_02_I_III_96426_96762	JB1206_EBC138	I	106338	10	336	+	23	Sk
158_JB22_J_5_I_1177825_1178194	JB22	I	106347	0	369	+	23	Sp
74_JB22_EBC2_J_S_07_I_5486299_5486635	JB22_EBC2	I	106347	0	336	+	23	Sp
41_JB4_J_1_I_3691656_3692025	JB4	I	106347	0	369	+	23	Sp
144_JB4_EBC069_J_S_08_I_5407454_5407823	JB4_EBC069	I	106347	0	369	+	23	Sp
229_JB758_J_2_I_51918_52287	JB758	I	106338	10	369	+	23	Sk
76_JB760_J_1_I_643642_643978	JB760	I	106347	0	336	+	23	Sp
79_JB760_EBC074_J_S_11_I_3715513_3715849	JB760_EBC074	I	106347	0	336	+	23	Sp
170_JB837_J_6_I_86182_86551	JB837	I	106338	10	369	+	23	Sk
169_JB840_J_4_I_55871_56207	JB840	I	106348	0	336	+	23	Sk
111_JB842_EBC080_J_S_10_I_63445_63814	JB842_EBC080	I	106347	0	369	+	23	Sk
114_JB853_EBC085_J_S_06_I_3730920_3731256	JB853_EBC085	I	106347	0	336	+	23	Sk
33_JB854_J_14_I_55727_56096	JB854	I	106348	0	369	+	23	Sk
122_JB858_EBC087_J_S_16_II_I_75263_75632	JB858_EBC087	I	106348	0	369	+	23	Sk
78_JB869_J_2_I_129644_129980	JB869	I	106338	10	336	+	23	Sp
145_JB872_EBC094_J_S_08_I_117476_117812	JB872_EBC094	I	106338	10	336	+	23	Sk
116_JB873_J_35_I_57052_57388	JB873	I	106338	10	336	+	23	Sk
100_JB873_EBC095_J_S_08_I_3718785_3719121	JB873_EBC095	I	106347	0	336	+	23	Sk
161_JB874_J_1_I_104013_104382	JB874	I	106338	10	369	+	23	Sk
112_JB900_EBC131_J_S_1607_I_5500428_5500764	JB900_EBC131	I	106347	0	336	+	23	Sp
145_JB918_EBC111_J_S_599_II_I_78018_78354	JB918_EBC111	I	106338	10	336	+	23	Sp
33_JB929_J_10_I_313305_313674	JB929	I	106347	0	369	+	23	Sk
10_JB934_EBC115_J_S_00_I_16470_16806	JB934_EBC115	I	106338	10	336	+	23	Sk
62_JB938_J_54_II_I_82008_82344	JB938	I	106338	10	336	+	23	Sp
6_JB939_EBC119_J_S_00_I_69161_69497	JB939_EBC119	I	106338	10	336	+	23	Sp
132_JB943_J_11_I_3732214_3732550	JB943	I	106347	0	336	+	23	Sp
185_JB953_J_8_I_58029_58365	JB953	I	106338	10	336	+	23	Sk
23_JB837_J_6_I_87686_92601	JB837	I	107843	10	4915	-	24	Sk
186_JB953_J_8_I_98340_98690	JB953	I	146653	10	350	-	26	Sp
19_JB1174_EBC132_J_S_00_I_5530141_5535056	JB1174_EBC132	I	157995	10	4915	+	27	Sk
17_JB900_EBC131_J_S_1607_I_5444189_5449104	JB900_EBC131	I	157995	10	4915	+	27	Sk
113_JB853_EBC085_J_S_06_I_3674675_3674858	JB853_EBC085	I	162755	0	183	+	28	Sp
22_JB874_J_1_I_205808_210723	JB874	I	208272	10	4915	-	29	Sk
23_JB874_J_1_I_233480_238420	JB874	I	231017	10	4940	+	30	Sk
131_JB943_J_11_I_3607497_3607854	JB943	I	231079	10	357	+	30	Sk
2_JB1110_EBC121_J_S_05_I_II_222960_227814	JB1110_EBC121	I	240473	30	4854	-	31	Sp
29_JB918_EBC111_J_S_599_II_I_212144_217022	JB918_EBC111	I	240469	10	4878	-	31	Sp
30_JB918_EBC111_J_S_599_II_I_217134_219636	JB918_EBC111	I	240575	10	2502	-	31	Sp
31_JB918_EBC111_J_S_599_II_I_226929_228854	JB918_EBC111	I	247859	10	1925	+	32	Sk
18_JB1174_EBC132_J_S_00_I_5401508_5406448	JB1174_EBC132	I	281708	10	4940	-	35	Sk
16_JB900_EBC131_J_S_1607_I_5315550_5320490	JB900_EBC131	I	281708	10	4940	-	35	Sk
226_JB1180_J_68_I_II_292015_292363	JB1180	I	304354	10	348	+	36	Sk
227_JB1180_J_68_I_II_292370_306398	JB1180	I	304359	360	14028	+	36	Sk
228_JB1180_J_71_1_385	JB1180	I	304360	0	384	-	36	Sk
58_JB1180_J_73_I_78270_81138	JB1180	I	384692	10	2868	+	37	Sk
17_JB1174_EBC132_J_S_00_I_5281287_5286199	JB1174_EBC132	I	397010	0	4912	-	38	Sk
157_JB22_J_5_I_887300_887647	JB22	I	397013	10	347	-	38	Sp
73_JB22_EBC2_J_S_07_I_5195605_5195952	JB22_EBC2	I	397013	10	347	-	38	Sp
75_JB760_J_1_I_352930_353277	JB760	I	397013	10	347	-	38	Sp
78_JB760_EBC074_J_S_11_I_3424828_3425175	JB760_EBC074	I	397013	10	347	-	38	Sp
13_JB853_EBC085_J_S_06_I_3435497_3440412	JB853_EBC085	I	397014	30	4915	-	38	Sk
34_JB854_J_14_I_346115_346462	JB854	I	397013	10	347	-	38	Sp
79_JB869_J_2_I_420283_420630	JB869	I	397013	10	347	-	38	Sp
220_JB879_J_8_I_170848_171195	JB879	I	397013	10	347	-	38	Sp
15_JB900_EBC131_J_S_1607_I_5195329_5200241	JB900_EBC131	I	397010	0	4912	-	38	Sk
63_JB938_J_54_II_I_372680_373027	JB938	I	397013	10	347	-	38	Sp
7_JB939_EBC119_J_S_00_I_359732_360079	JB939_EBC119	I	397013	10	347	-	38	Sp
Pomberef_177_comp_len348	Pomberef	I	397013	10	348	-	38	Sp
177_DY34373_L_1_I_3379363_3379736	DY34373	I	402398	10	373	+	39	Sk
159_DY39827_L_1_I_3401220_3401593	DY39827	I	402398	10	373	+	39	Sk
55_JB1110_EBC121_J_S_05_I_II_389330_389703	JB1110_EBC121	I	402398	10	373	+	39	Sk
123_JB1174_EBC132_J_S_00_I_5275861_5276234	JB1174_EBC132	I	402398	10	373	+	39	Sk
229_JB1180_J_73_I_98511_98884	JB1180	I	402398	10	373	+	39	Sk
196_JB1197_EBC135_J_S_68_I_634347_634720	JB1197_EBC135	I	402398	10	373	+	39	Sk
197_JB1205_EBC137_J_S_23_I_III_392154_392527	JB1205_EBC137	I	402398	10	373	+	39	Sk
100_JB1206_J_2_I_III_2204534_2204907	JB1206	I	402398	10	373	+	39	Sk
34_JB1206_EBC138_J_S_02_I_III_392170_392543	JB1206_EBC138	I	402398	10	373	+	39	Sk
156_JB22_J_5_I_881893_882266	JB22	I	402398	10	373	+	39	Sp
72_JB22_EBC2_J_S_07_I_5190194_5190567	JB22_EBC2	I	402398	10	373	+	39	Sp
40_JB4_J_1_I_3396395_3396768	JB4	I	402398	10	373	+	39	Sk
143_JB4_EBC069_J_S_08_I_5112192_5112565	JB4_EBC069	I	402398	10	373	+	39	Sk
230_JB758_J_2_I_347603_347976	JB758	I	402398	10	373	+	39	Sk
74_JB760_J_1_I_347519_347892	JB760	I	402398	10	373	+	39	Sp
77_JB760_EBC074_J_S_11_I_3419417_3419790	JB760_EBC074	I	402398	10	373	+	39	Sp
171_JB837_J_6_I_386683_387056	JB837	I	402398	10	373	+	39	Sk
170_JB840_J_4_I_351438_351811	JB840	I	402398	10	373	+	39	Sk
110_JB842_EBC080_J_S_08_I_3249893_3250266	JB842_EBC080	I	402398	10	373	+	39	Sk
19_JB842_EBC080_J_S_08_I_3232851_3237766	JB842_EBC080	I	414903	10	4915	+	39	Sk
112_JB853_EBC085_J_S_06_I_3430105_3430478	JB853_EBC085	I	402398	10	373	+	39	Sk
35_JB854_J_14_I_351498_351871	JB854	I	402398	10	373	+	39	Sp
52_JB858_EBC087_J_S_08_I_251036_251810	JB858_EBC087	I	402399	10	774	+	39	Sk
163_JB864_J_89_I_983696_984070	JB864	I	402398	10	374	+	39	Sk
80_JB869_J_2_I_425667_426040	JB869	I	402398	10	373	+	39	Sp
146_JB872_EBC094_J_S_08_I_413091_413464	JB872_EBC094	I	402398	10	373	+	39	Sk
101_JB873_J_26_I_II_193840_199255	JB873	I	402398	10	5415	+	39	Sk
107_JB873_J_32_I_137495_137961	JB873	I	414913	0	466	+	39	Sk
JB873_EBC095_127_comp_len374	JB873_EBC095	I	402397	10	374	+	39	Sk
8_JB873_EBC095_J_S_08_I_3418240_3423155	JB873_EBC095	I	402397	390	4915	-	39	Sk
7_JB873_EBC095_J_S_08_I_3401197_3406112	JB873_EBC095	I	402803	20	4915	+	39	Sk
162_JB874_J_1_I_409472_409845	JB874	I	402398	10	373	+	39	Sk
221_JB879_J_8_I_176233_176606	JB879	I	402398	10	373	+	39	Sp
111_JB900_EBC131_J_S_1607_I_5189903_5190276	JB900_EBC131	I	402398	10	373	+	39	Sk
146_JB918_EBC111_J_S_599_II_I_383055_383428	JB918_EBC111	I	402398	10	373	+	39	Sk
32_JB929_J_10_I_17720_18093	JB929	I	402398	10	373	+	39	Sk
1_JB929_J_10_I_677_5592	JB929	I	414903	10	4915	+	39	Sk
11_JB934_EBC115_J_S_00_I_312200_312573	JB934_EBC115	I	402398	10	373	+	39	Sk
64_JB938_J_54_II_I_378064_378437	JB938	I	402398	10	373	+	39	Sp
8_JB939_EBC119_J_S_00_I_365117_365490	JB939_EBC119	I	402398	10	373	+	39	Sp
130_JB943_J_11_I_3436142_3436515	JB943	I	402398	10	373	+	39	Sk
125_JB953_J_1_II_I_3519444_3519817	JB953	I	402398	10	373	+	39	Sk
Pomberef_178_plus_len374	Pomberef	I	402398	10	374	+	39	Sp
10_JB858_EBC087_J_S_08_I_285101_290016	JB858_EBC087	I	436104	10	4915	-	40	Sk
231_JB758_J_2_I_435103_435464	JB758	I	489869	10	361	-	41	Sk
16_JB1174_EBC132_J_S_00_I_5153265_5158205	JB1174_EBC132	I	520386	10	4940	+	42	Sk
163_JB874_J_1_I_527522_527886	JB874	I	520424	0	364	-	42	Sk
14_JB900_EBC131_J_S_1607_I_5067309_5072249	JB900_EBC131	I	520386	10	4940	+	42	Sk
176_DY34373_L_1_I_3218434_3218781	DY34373	I	563312	0	347	-	43	Sk
158_DY39827_L_1_I_3240283_3240630	DY39827	I	563312	0	347	-	43	Sk
56_JB1110_EBC121_J_S_05_I_II_550324_550671	JB1110_EBC121	I	563303	10	347	-	43	Sk
122_JB1174_EBC132_J_S_00_I_5109974_5110321	JB1174_EBC132	I	563312	0	347	-	43	Sk
230_JB1180_J_73_I_259384_259731	JB1180	I	563303	10	347	-	43	Sk
197_JB1197_EBC135_J_S_68_I_795322_795669	JB1197_EBC135	I	563303	10	347	-	43	Sk
198_JB1205_EBC137_J_S_23_I_III_553079_553426	JB1205_EBC137	I	563303	10	347	-	43	Sk
99_JB1206_J_2_I_III_2043605_2043952	JB1206	I	563312	0	347	-	43	Sk
35_JB1206_EBC138_J_S_02_I_III_553138_553485	JB1206_EBC138	I	563303	10	347	-	43	Sk
155_JB22_J_5_I_721041_721386	JB22	I	563312	0	345	-	43	Sp
71_JB22_EBC2_J_S_07_I_5029306_5029651	JB22_EBC2	I	563312	0	345	-	43	Sp
39_JB4_J_1_I_3235477_3235824	JB4	I	563312	0	347	-	43	Sk
142_JB4_EBC069_J_S_08_I_4951273_4951620	JB4_EBC069	I	563312	0	347	-	43	Sk
232_JB758_J_2_I_508933_509280	JB758	I	563303	10	347	-	43	Sk
73_JB760_J_1_I_186646_186991	JB760	I	563312	0	345	-	43	Sp
76_JB760_EBC074_J_S_11_I_3258531_3258876	JB760_EBC074	I	563312	0	345	-	43	Sp
172_JB837_J_6_I_547555_547902	JB837	I	563303	10	347	-	43	Sk
171_JB840_J_4_I_512395_512740	JB840	I	563303	10	345	-	43	Sk
109_JB842_EBC080_J_S_08_I_3084056_3084403	JB842_EBC080	I	563312	0	347	-	43	Sk
111_JB853_EBC085_J_S_06_I_3269188_3269535	JB853_EBC085	I	563312	0	347	-	43	Sk
36_JB854_J_14_I_512428_512775	JB854	I	563303	10	347	-	43	Sk
53_JB858_EBC087_J_S_08_I_417227_417572	JB858_EBC087	I	563303	10	345	-	43	Sk
162_JB864_J_89_I_822869_823214	JB864	I	563312	0	345	-	43	Sk
81_JB869_J_2_I_586504_586849	JB869	I	563303	10	345	-	43	Sp
147_JB872_EBC094_J_S_08_I_574053_574400	JB872_EBC094	I	563303	10	347	-	43	Sk
99_JB873_EBC095_J_S_08_I_3252414_3252761	JB873_EBC095	I	563312	0	347	-	43	Sk
164_JB874_J_1_I_570772_571119	JB874	I	563303	10	347	-	43	Sk
JB879_236_comp_len342	JB879	I	563296	0	342	-	43	Sp
110_JB900_EBC131_J_S_1607_I_5024016_5024363	JB900_EBC131	I	563312	0	347	-	43	Sk
147_JB918_EBC111_J_S_599_II_I_543994_544341	JB918_EBC111	I	563303	10	347	-	43	Sk
144_JB929_J_31_I_146606_146953	JB929	I	563303	10	347	-	43	Sk
12_JB934_EBC115_J_S_00_I_473148_473495	JB934_EBC115	I	563303	10	347	-	43	Sk
135_JB938_J_68_I_81270_81615	JB938	I	563303	10	345	-	43	Sp
9_JB939_EBC119_J_S_00_I_526044_526389	JB939_EBC119	I	563303	10	345	-	43	Sp
129_JB943_J_11_I_3274996_3275341	JB943	I	563312	0	345	-	43	Sk
126_JB953_J_1_II_I_3680390_3680737	JB953	I	563303	10	347	-	43	Sk
Pomberef_179_comp_len342	Pomberef	I	563296	0	342	-	43	Sp
15_JB858_EBC087_J_S_08_I_432205_437120	JB858_EBC087	I	578277	10	4915	-	44	Sk
3_JB1110_EBC121_J_S_05_I_II_568563_578318	JB1110_EBC121	I	581547	10	9755	+	45	Sk
4_JB1110_EBC121_J_S_06_3444_8354	JB1110_EBC121	I	581547	10	4910	+	45	Sk
JB1110_EBC121_40_comp_len347	JB1110_EBC121	I	581547	9810	347	-	45	Sk
JB1110_EBC121_39_comp_len4585	JB1110_EBC121	I	581552	5240	4585	-	45	Sk
JB1110_EBC121_41_comp_len4589	JB1110_EBC121	I	581554	10150	4589	-	45	Sk
1_JB1110_EBC121_J_S_01_24_14683	JB1110_EBC121	I	581556	0	14659	+	45	Sk
6_JB1110_EBC121_J_S_07_I_5259_10158	JB1110_EBC121	I	581562	10	4899	+	45	Sk
JB1110_EBC121_42_comp_len693	JB1110_EBC121	I	581568	9480	693	-	45	Sk
29_JB874_J_1_I_589350_594265	JB874	I	581889	10	4915	-	45	Sk
19_JB929_J_31_I_165187_170102	JB929	I	581889	10	4915	-	45	Sk
30_JB872_EBC094_J_S_08_I_608892_613832	JB872_EBC094	I	598133	10	4940	-	46	Sk
175_DY34373_L_1_I_3164386_3164736	DY34373	I	617335	30	350	-	47	NA
157_DY39827_L_1_I_3186233_3186583	DY39827	I	617345	20	350	-	47	NA
57_JB1110_EBC121_J_S_07_I_45981_46331	JB1110_EBC121	I	617336	30	350	-	47	NA
121_JB1174_EBC132_J_S_00_I_5055914_5056264	JB1174_EBC132	I	617345	20	350	-	47	NA
231_JB1180_J_73_I_313418_313768	JB1180	I	617336	30	350	-	47	NA
198_JB1197_EBC135_J_S_68_I_849392_849742	JB1197_EBC135	I	617336	30	350	-	47	NA
199_JB1205_EBC137_J_S_23_I_III_607135_607485	JB1205_EBC137	I	617336	30	350	-	47	NA
98_JB1206_J_2_I_III_1989557_1989907	JB1206	I	617345	20	350	-	47	NA
36_JB1206_EBC138_J_S_02_I_III_607185_607535	JB1206_EBC138	I	617336	30	350	-	47	NA
154_JB22_J_5_I_667005_667354	JB22	I	617335	30	349	-	47	Sp
70_JB22_EBC2_J_S_07_I_4975249_4975598	JB22_EBC2	I	617335	30	349	-	47	Sp
38_JB4_J_1_I_3181412_3181762	JB4	I	617335	30	350	-	47	NA
141_JB4_EBC069_J_S_08_I_4897208_4897558	JB4_EBC069	I	617335	30	350	-	47	NA
233_JB758_J_2_I_562985_563335	JB758	I	617336	30	350	-	47	NA
72_JB760_J_1_I_132596_132945	JB760	I	617335	30	349	-	47	Sp
75_JB760_EBC074_J_S_11_I_3204474_3204823	JB760_EBC074	I	617345	20	349	-	47	Sp
173_JB837_J_6_I_601618_601968	JB837	I	617336	30	350	-	47	NA
172_JB840_J_4_I_566434_566784	JB840	I	617336	30	350	-	47	NA
108_JB842_EBC080_J_S_08_I_3029996_3030346	JB842_EBC080	I	617335	30	350	-	47	NA
110_JB853_EBC085_J_S_06_I_3215129_3215479	JB853_EBC085	I	617345	20	350	-	47	NA
37_JB854_J_14_I_566483_566833	JB854	I	617336	30	350	-	47	NA
54_JB858_EBC087_J_S_08_I_476211_476561	JB858_EBC087	I	617336	30	350	-	47	NA
161_JB864_J_89_I_768815_769165	JB864	I	617335	30	350	-	47	NA
82_JB869_J_2_I_640547_640896	JB869	I	617336	30	349	-	47	Sp
148_JB872_EBC094_J_S_08_I_633070_633420	JB872_EBC094	I	617336	30	350	-	47	NA
179_JB873_J_54_I_47886_48236	JB873	I	617336	30	350	-	47	NA
98_JB873_EBC095_J_S_08_I_3198355_3198705	JB873_EBC095	I	617335	30	350	-	47	NA
JB874_251_plus_len322	JB874	I	617336	30	322	+	47	NA
30_JB874_J_1_I_630068_635008	JB874	I	617339	350	4940	-	47	NA
179_JB879_J_70_I_39560_39909	JB879	I	617335	30	349	-	47	Sp
109_JB900_EBC131_J_S_1607_I_4969956_4970306	JB900_EBC131	I	617335	30	350	-	47	NA
148_JB918_EBC111_J_S_599_II_I_598050_598400	JB918_EBC111	I	617336	30	350	-	47	NA
145_JB929_J_31_I_205583_205933	JB929	I	617336	30	350	-	47	NA
13_JB934_EBC115_J_S_00_I_527209_527559	JB934_EBC115	I	617336	30	350	-	47	NA
136_JB938_J_68_I_135321_135670	JB938	I	617336	30	349	-	47	Sp
10_JB939_EBC119_J_S_00_I_580092_580441	JB939_EBC119	I	617336	30	349	-	47	Sp
128_JB943_J_11_I_3220937_3221287	JB943	I	617345	20	350	-	47	NA
127_JB953_J_1_II_I_3734454_3734804	JB953	I	617336	30	350	-	47	NA
Pomberef_180_plus_len349	Pomberef	I	617336	30	349	+	47	Sp
2_JB760_J_1_I_125850_127998	JB760	I	622302	10	2148	-	48	Sp
8_JB760_EBC074_J_S_11_I_3197728_3199876	JB760_EBC074	I	622302	10	2148	-	48	Sp
56_JB1180_J_73_I_346412_351351	JB1180	I	650352	10	4939	-	49	Sk
180_JB873_J_54_I_80948_81117	JB873	I	650424	0	169	+	49	Sk
94_JB873_J_23_I_325223_325687	JB873	I	650442	10	464	-	49	Sk
6_JB873_EBC095_J_S_08_I_3160712_3165627	JB873_EBC095	I	650428	10	4915	-	49	Sk
39_JB918_EBC111_J_S_599_II_I_631052_635967	JB918_EBC111	I	650352	10	4915	-	49	Sk
18_JB842_EBC080_J_S_08_I_2980337_2983407	JB842_EBC080	I	664268	10	3070	-	50	Sk
40_JB918_EBC111_J_S_599_II_I_649911_654826	JB918_EBC111	I	664269	10	4915	+	50	Sk
174_DY34373_L_1_I_3111935_3112277	DY34373	I	669769	20	342	+	51	Sk
156_DY39827_L_1_I_3133782_3134124	DY39827	I	669769	20	342	+	51	Sk
58_JB1110_EBC121_J_S_07_I_98431_98773	JB1110_EBC121	I	669770	20	342	+	51	Sk
120_JB1174_EBC132_J_S_00_I_5003478_5003809	JB1174_EBC132	I	669774	10	331	-	51	Sk
232_JB1180_J_73_I_370790_371132	JB1180	I	669770	20	342	+	51	Sk
199_JB1197_EBC135_J_S_68_I_901856_902198	JB1197_EBC135	I	669770	20	342	+	51	Sk
200_JB1205_EBC137_J_S_23_I_III_659561_659908	JB1205_EBC137	I	669775	10	347	-	51	Sp
97_JB1206_J_2_I_III_1937108_1937450	JB1206	I	669779	10	342	+	51	Sk
37_JB1206_EBC138_J_S_02_I_III_659645_659987	JB1206_EBC138	I	669770	20	342	+	51	Sk
153_JB22_J_5_I_614594_614941	JB22	I	669774	10	347	-	51	Sp
69_JB22_EBC2_J_S_07_I_4922831_4923178	JB22_EBC2	I	669774	10	347	-	51	Sp
37_JB4_J_1_I_3128970_3129312	JB4	I	669769	20	342	+	51	Sk
140_JB4_EBC069_J_S_08_I_4844766_4845108	JB4_EBC069	I	669769	20	342	+	51	Sk
234_JB758_J_2_I_615441_615783	JB758	I	669770	20	342	+	51	Sk
71_JB760_J_1_I_78024_78371	JB760	I	669774	10	347	-	51	Sp
74_JB760_EBC074_J_S_11_I_3149901_3150248	JB760_EBC074	I	669774	10	347	-	51	Sp
174_JB837_J_6_I_654063_654405	JB837	I	669770	20	342	+	51	Sk
173_JB840_J_4_I_618886_619228	JB840	I	669770	20	342	+	51	Sk
107_JB842_EBC080_J_S_08_I_2974478_2974820	JB842_EBC080	I	669769	20	342	+	51	Sk
109_JB853_EBC085_J_S_06_I_3162685_3163027	JB853_EBC085	I	669769	20	342	+	51	Sk
38_JB854_J_14_I_618934_619276	JB854	I	669770	20	342	+	51	Sk
55_JB858_EBC087_J_S_08_I_528661_529003	JB858_EBC087	I	669770	20	342	+	51	Sk
160_JB864_J_89_I_716382_716724	JB864	I	669769	20	342	+	51	Sk
83_JB869_J_2_I_692952_693299	JB869	I	669775	10	347	-	51	Sp
149_JB872_EBC094_J_S_08_I_685524_685855	JB872_EBC094	I	669775	10	331	-	51	Sk
93_JB873_J_23_I_305565_305912	JB873	I	669774	10	347	-	51	Sp
97_JB873_EBC095_J_S_08_I_3140992_3141339	JB873_EBC095	I	669774	10	347	-	51	Sp
165_JB874_J_1_I_687132_687479	JB874	I	669775	10	347	-	51	Sp
166_JB879_J_65_I_238130_238477	JB879	I	669774	10	347	-	51	Sp
108_JB900_EBC131_J_S_1607_I_4917515_4917846	JB900_EBC131	I	669774	10	331	-	51	Sk
149_JB918_EBC111_J_S_599_II_I_660343_660685	JB918_EBC111	I	669770	20	342	+	51	Sk
146_JB929_J_31_I_258034_258376	JB929	I	669770	20	342	+	51	Sk
14_JB934_EBC115_J_S_00_I_579659_580001	JB934_EBC115	I	669770	20	342	+	51	Sk
137_JB938_J_68_I_187746_188093	JB938	I	669775	10	347	-	51	Sp
11_JB939_EBC119_J_S_00_I_632517_632864	JB939_EBC119	I	669775	10	347	-	51	Sp
127_JB943_J_11_I_3168490_3168832	JB943	I	669769	20	342	+	51	Sk
128_JB953_J_1_II_I_3786903_3787245	JB953	I	669770	20	342	+	51	Sk
Pomberef_181_comp_len346	Pomberef	I	669775	10	346	-	51	Sp
15_JB1174_EBC132_J_S_00_I_4990255_4995195	JB1174_EBC132	I	678400	10	4940	+	52	Sk
200_JB1197_EBC135_J_S_68_I_910642_910696	JB1197_EBC135	I	678572	0	54	-	52	Sk
10_JB1205_EBC137_J_S_23_I_III_668188_673128	JB1205_EBC137	I	678401	10	4940	+	52	Sp
31_JB872_EBC094_J_S_08_I_694138_699078	JB872_EBC094	I	678401	10	4940	+	52	Sk
13_JB900_EBC131_J_S_1607_I_4904292_4909232	JB900_EBC131	I	678400	10	4940	+	52	Sk
129_JB953_J_1_II_I_3795688_3795742	JB953	I	678572	0	54	-	52	Sk
126_JB943_J_11_I_3154456_3154806	JB943	I	683802	10	350	-	53	Sk
42_JB918_EBC111_J_S_599_II_I_677006_681928	JB918_EBC111	I	686440	10	4922	-	54	Sk
11_JB1205_EBC137_J_S_23_I_III_718944_723884	JB1205_EBC137	I	724211	10	4940	+	55	Sp
5_JB1110_EBC121_J_S_07_I_185905_190845	JB1110_EBC121	I	757229	10	4940	-	56	Sp
173_DY34373_L_1_I_3014302_3014661	DY34373	I	767351	0	359	-	57	Sk
155_DY39827_L_1_I_3036143_3036502	DY39827	I	767351	0	359	-	57	Sk
96_JB1206_J_2_I_III_1839476_1839835	JB1206	I	767351	0	359	-	57	Sk
38_JB1206_EBC138_J_S_02_I_III_757268_757627	JB1206_EBC138	I	767342	10	359	-	57	Sk
235_JB758_J_2_I_712976_713338	JB758	I	767342	10	362	-	57	Sk
12_JB1205_EBC137_J_S_23_I_III_794580_796705	JB1205_EBC137	I	794924	10	2125	+	58	Sp
236_JB758_J_2_I_769407_770120	JB758	I	823409	10	713	+	59	Sk
172_DY34373_L_1_I_2953524_2953745	DY34373	I	828175	0	221	-	60	Sk
154_DY39827_L_1_I_2975121_2975342	DY39827	I	828175	0	221	-	60	Sk
59_JB1110_EBC121_J_S_07_I_261772_261874	JB1110_EBC121	I	828176	0	102	+	60	Sp
119_JB1174_EBC132_J_S_00_I_4840375_4840477	JB1174_EBC132	I	828175	0	102	+	60	Sp
233_JB1180_J_73_I_529104_529325	JB1180	I	828176	0	221	-	60	Sk
201_JB1197_EBC135_J_S_68_I_1060271_1060491	JB1197_EBC135	I	828176	0	220	-	60	Sk
201_JB1205_EBC137_J_S_23_I_III_829963_830065	JB1205_EBC137	I	828176	0	102	+	60	Sp
95_JB1206_J_2_I_III_1778457_1778678	JB1206	I	828175	0	221	-	60	Sk
39_JB1206_EBC138_J_S_02_I_III_818428_818649	JB1206_EBC138	I	828176	0	221	-	60	Sk
152_JB22_J_5_I_456487_456589	JB22	I	828175	0	102	+	60	Sp
68_JB22_EBC2_J_S_07_I_4764699_4764801	JB22_EBC2	I	828175	0	102	+	60	Sp
36_JB4_J_1_I_2970701_2970922	JB4	I	828175	0	221	-	60	Sk
139_JB4_EBC069_J_S_08_I_4686496_4686717	JB4_EBC069	I	828175	0	221	-	60	Sk
237_JB758_J_2_I_774873_775094	JB758	I	828176	0	221	-	60	Sk
56_JB760_J_18_I_365412_365514	JB760	I	828175	0	102	+	60	Sp
73_JB760_EBC074_J_S_11_I_2991767_2991869	JB760_EBC074	I	828175	0	102	+	60	Sp
175_JB837_J_6_I_812448_812669	JB837	I	828176	0	221	-	60	Sk
174_JB840_J_4_I_777313_777534	JB840	I	828176	0	221	-	60	Sk
106_JB842_EBC080_J_S_08_I_2816209_2816430	JB842_EBC080	I	828175	0	221	-	60	Sk
108_JB853_EBC085_J_S_06_I_3004420_3004641	JB853_EBC085	I	828175	0	221	-	60	Sk
39_JB854_J_14_I_777296_777517	JB854	I	828176	0	221	-	60	Sk
56_JB858_EBC087_J_S_08_I_687050_687271	JB858_EBC087	I	828176	0	221	-	60	Sk
159_JB864_J_89_I_558117_558338	JB864	I	828175	0	221	-	60	Sk
84_JB869_J_2_I_851285_851387	JB869	I	828176	0	102	+	60	Sp
150_JB872_EBC094_J_S_08_I_848896_849116	JB872_EBC094	I	828176	0	220	-	60	Sk
92_JB873_J_23_I_147296_147517	JB873	I	828175	0	221	-	60	Sk
96_JB873_EBC095_J_S_08_I_2982713_2982943	JB873_EBC095	I	828175	0	230	+	60	Sk
166_JB874_J_1_I_845528_845749	JB874	I	828176	0	221	-	60	Sk
165_JB879_J_65_I_80143_80245	JB879	I	828175	0	102	+	60	Sp
107_JB900_EBC131_J_S_1607_I_4754411_4754513	JB900_EBC131	I	828175	0	102	+	60	Sp
150_JB918_EBC111_J_S_599_II_I_823635_823855	JB918_EBC111	I	828176	0	220	-	60	Sk
147_JB929_J_31_I_416416_416637	JB929	I	828176	0	221	-	60	Sk
15_JB934_EBC115_J_S_00_I_738064_738294	JB934_EBC115	I	828176	0	230	+	60	Sk
120_JB938_J_61_I_521967_522069	JB938	I	828175	0	102	+	60	Sp
12_JB939_EBC119_J_S_00_I_790841_790943	JB939_EBC119	I	828176	0	102	+	60	Sp
125_JB943_J_11_I_3009969_3010071	JB943	I	828175	0	102	+	60	Sp
130_JB953_J_1_II_I_3945365_3945585	JB953	I	828176	0	220	-	60	Sk
57_JB1180_J_73_I_544151_547094	JB1180	I	843212	10	2943	-	61	Sk
31_JB874_J_1_I_901642_906582	JB874	I	884253	10	4940	-	62	NA
17_JB842_EBC080_J_S_08_I_2745095_2750010	JB842_EBC080	I	894567	0	4915	+	63	Sp
91_JB873_J_23_I_80363_80721	JB873	I	894914	0	358	-	64	Sk
95_JB873_EBC095_J_S_08_I_2915786_2916144	JB873_EBC095	I	894914	0	358	-	64	Sk
16_JB842_EBC080_J_S_08_I_2724718_2727844	JB842_EBC080	I	911802	10	3126	+	65	Sp
24_JB837_J_6_I_933407_938322	JB837	I	949113	10	4915	+	66	Sp
16_JB858_EBC087_J_S_08_I_842509_847424	JB858_EBC087	I	983604	10	4915	-	67	Sk
238_JB758_J_2_I_934874_935233	JB758	I	988106	10	359	-	68	Sk
151_JB872_EBC094_J_S_08_I_1019436_1019787	JB872_EBC094	I	998615	10	351	-	69	Sp
171_DY34373_L_1_I_2776965_2777939	DY34373	I	1003915	0	974	-	70	Sk
153_DY39827_L_1_I_2798556_2799530	DY39827	I	1003915	0	974	-	70	Sk
60_JB1110_EBC121_J_S_07_I_437515_438848	JB1110_EBC121	I	1003916	0	1333	-	70	Sp
118_JB1174_EBC132_J_S_00_I_4663690_4664664	JB1174_EBC132	I	1003915	0	974	-	70	Sp
234_JB1180_J_73_I_707739_708712	JB1180	I	1003916	0	973	-	70	Sk
202_JB1197_EBC135_J_S_68_I_1236102_1237076	JB1197_EBC135	I	1003916	0	974	-	70	Sk
202_JB1205_EBC137_J_S_23_I_III_1005727_1007060	JB1205_EBC137	I	1003916	0	1333	-	70	Sp
94_JB1206_J_2_I_III_1601550_1602883	JB1206	I	1003915	0	1333	-	70	Sp
40_JB1206_EBC138_J_S_02_I_III_994238_995571	JB1206_EBC138	I	1003916	0	1333	-	70	Sp
151_JB22_J_5_I_279610_280943	JB22	I	1003915	0	1333	-	70	Sp
67_JB22_EBC2_J_S_07_I_4587721_4589054	JB22_EBC2	I	1003915	0	1333	-	70	Sp
35_JB4_J_1_I_2793818_2795151	JB4	I	1003915	0	1333	-	70	Sp
138_JB4_EBC069_J_S_08_I_4509609_4510942	JB4_EBC069	I	1003915	0	1333	-	70	Sp
239_JB758_J_2_I_951030_952004	JB758	I	1003916	0	974	-	70	Sk
55_JB760_J_18_I_188444_189777	JB760	I	1003915	0	1333	-	70	Sp
72_JB760_EBC074_J_S_11_I_2814792_2816125	JB760_EBC074	I	1003915	0	1333	-	70	Sp
25_JB837_J_6_I_994083_999020	JB837	I	1004882	10	4937	+	70	Sk
175_JB840_J_4_I_953130_954106	JB840	I	1003916	0	976	-	70	Sk
105_JB842_EBC080_J_S_08_I_2631192_2632525	JB842_EBC080	I	1003915	0	1333	-	70	Sp
107_JB853_EBC085_J_S_06_I_2827847_2828823	JB853_EBC085	I	1003915	0	976	-	70	Sk
40_JB854_J_14_I_953070_954046	JB854	I	1003916	0	976	-	70	Sk
57_JB858_EBC087_J_S_08_I_867818_869151	JB858_EBC087	I	1003916	0	1333	-	70	Sp
158_JB864_J_89_I_381611_382587	JB864	I	1003915	0	976	-	70	Sk
85_JB869_J_2_I_1027009_1028342	JB869	I	1003916	0	1333	-	70	Sp
152_JB872_EBC094_J_S_08_I_1025083_1026416	JB872_EBC094	I	1003916	0	1333	-	70	Sp
41_JB873_J_13_I_90215_91548	JB873	I	1003915	0	1333	-	70	Sp
94_JB873_EBC095_J_S_08_I_2805460_2806793	JB873_EBC095	I	1003915	0	1333	-	70	Sp
167_JB874_J_1_I_1026226_1027559	JB874	I	1003916	0	1333	-	70	Sp
215_JB879_J_83_I_92255_93588	JB879	I	1003916	0	1333	-	70	Sp
106_JB900_EBC131_J_S_1607_I_4577725_4578699	JB900_EBC131	I	1003915	0	974	-	70	Sp
151_JB918_EBC111_J_S_599_II_I_999438_1000771	JB918_EBC111	I	1003916	0	1333	-	70	Sp
148_JB929_J_31_I_592181_593514	JB929	I	1003916	0	1333	-	70	Sp
16_JB934_EBC115_J_S_00_I_913842_914816	JB934_EBC115	I	1003916	0	974	-	70	Sk
119_JB938_J_61_I_345000_346333	JB938	I	1003915	0	1333	-	70	Sp
13_JB939_EBC119_J_S_00_I_966632_967608	JB939_EBC119	I	1003916	0	976	-	70	Sk
19_JB943_J_11_I_2828098_2834370	JB943	I	1003904	0	6272	-	70	Sp
131_JB953_J_1_II_I_4121171_4122144	JB953	I	1003916	0	973	-	70	Sk
Pomberef_182_plus_len358	Pomberef	I	1004881	10	358	+	70	Sp
15_JB842_EBC080_J_S_08_I_2623888_2628386	JB842_EBC080	I	1008044	10	4498	+	71	Sp
170_DY34373_L_1_I_2737364_2737549	DY34373	I	1044614	60	185	+	72	Sk
152_DY39827_L_1_I_2758967_2759152	DY39827	I	1044614	60	185	+	72	Sk
61_JB1110_EBC121_J_S_07_I_478272_478457	JB1110_EBC121	I	1044605	70	185	+	72	Sp
117_JB1174_EBC132_J_S_00_I_4624086_4624271	JB1174_EBC132	I	1044614	60	185	+	72	Sp
235_JB1180_J_73_I_748117_748301	JB1180	I	1044605	70	184	+	72	Sk
203_JB1197_EBC135_J_S_68_I_1276538_1276723	JB1197_EBC135	I	1044605	70	185	+	72	Sk
203_JB1205_EBC137_J_S_23_I_III_1046483_1046668	JB1205_EBC137	I	1044605	70	185	+	72	Sp
93_JB1206_J_2_I_III_1561945_1562130	JB1206	I	1044614	60	185	+	72	Sp
41_JB1206_EBC138_J_S_02_I_III_1034995_1035180	JB1206_EBC138	I	1044605	70	185	+	72	Sp
150_JB22_J_5_I_239997_240182	JB22	I	1044614	60	185	+	72	Sp
66_JB22_EBC2_J_S_07_I_4548107_4548292	JB22_EBC2	I	1044614	60	185	+	72	Sp
34_JB4_J_1_I_2754211_2754396	JB4	I	1044614	60	185	+	72	Sp
137_JB4_EBC069_J_S_08_I_4470001_4470186	JB4_EBC069	I	1044614	60	185	+	72	Sp
240_JB758_J_2_I_991469_991678	JB758	I	1044605	70	209	-	72	Sk
54_JB760_J_18_I_148830_149015	JB760	I	1044614	60	185	+	72	Sp
71_JB760_EBC074_J_S_11_I_2775179_2775364	JB760_EBC074	I	1044614	60	185	+	72	Sp
176_JB837_J_6_I_1038432_1038617	JB837	I	1044605	70	185	+	72	Sk
176_JB840_J_4_I_993529_993714	JB840	I	1044605	70	185	+	72	Sk
14_JB842_EBC080_J_S_08_I_2582166_2587106	JB842_EBC080	I	1044612	220	4940	+	72	Sp
106_JB853_EBC085_J_S_06_I_2788238_2788423	JB853_EBC085	I	1044614	60	185	+	72	Sk
41_JB854_J_14_I_993474_993659	JB854	I	1044605	70	185	+	72	Sk
58_JB858_EBC087_J_S_08_I_908574_908759	JB858_EBC087	I	1044605	70	185	+	72	Sp
157_JB864_J_89_I_342000_342185	JB864	I	1044614	60	185	+	72	Sk
86_JB869_J_2_I_1067752_1067937	JB869	I	1044605	70	185	+	72	Sp
153_JB872_EBC094_J_S_08_I_1065840_1066025	JB872_EBC094	I	1044605	70	185	+	72	Sp
40_JB873_J_13_I_50608_50793	JB873	I	1044614	60	185	+	72	Sp
93_JB873_EBC095_J_S_08_I_2765853_2766038	JB873_EBC095	I	1044614	60	185	+	72	Sp
168_JB874_J_1_I_1066981_1067166	JB874	I	1044605	70	185	+	72	Sp
216_JB879_J_83_I_133014_133199	JB879	I	1044605	70	185	+	72	Sp
105_JB900_EBC131_J_S_1607_I_4538121_4538306	JB900_EBC131	I	1044614	60	185	+	72	Sp
152_JB918_EBC111_J_S_599_II_I_1040196_1040381	JB918_EBC111	I	1044605	70	185	+	72	Sp
149_JB929_J_31_I_632937_633122	JB929	I	1044605	70	185	+	72	Sp
17_JB934_EBC115_J_S_00_I_954268_954453	JB934_EBC115	I	1044605	70	185	+	72	Sk
118_JB938_J_61_I_305395_305580	JB938	I	1044614	60	185	+	72	Sp
14_JB939_EBC119_J_S_00_I_1007027_1007212	JB939_EBC119	I	1044605	70	185	+	72	Sk
124_JB943_J_11_I_2788490_2788675	JB943	I	1044614	60	185	+	72	Sk
132_JB953_J_1_II_I_4161597_4161782	JB953	I	1044605	70	185	+	72	Sk
80_JB929_J_13_I_16_304	JB929	I	1057634	0	288	+	73	Sp
25_JB918_EBC111_J_S_599_II_I_1058721_1063656	JB918_EBC111	I	1058239	4960	4935	-	74	Sp
24_JB918_EBC111_J_S_599_II_I_1053775_1058715	JB918_EBC111	I	1058243	10	4940	-	74	Sp
13_JB842_EBC080_J_S_08_I_2522518_2527433	JB842_EBC080	I	1099550	0	4915	+	75	Sp
169_DY34373_L_1_I_2663400_2663767	DY34373	I	1118423	10	367	+	76	Sk
151_DY39827_L_1_I_2685013_2685380	DY39827	I	1118423	10	367	+	76	Sk
7_JB1110_EBC121_J_S_07_I_552441_557363	JB1110_EBC121	I	1118421	410	4922	+	76	Sk
62_JB1110_EBC121_J_S_07_I_552044_552411	JB1110_EBC121	I	1118424	10	367	+	76	Sk
116_JB1174_EBC132_J_S_00_I_4550110_4550497	JB1174_EBC132	I	1118423	10	387	+	76	Sk
236_JB1180_J_73_I_821845_822212	JB1180	I	1118424	10	367	+	76	Sk
204_JB1197_EBC135_J_S_68_I_1350329_1350695	JB1197_EBC135	I	1118424	10	366	+	76	Sk
204_JB1205_EBC137_J_S_23_I_III_1120255_1120615	JB1205_EBC137	I	1118424	10	360	+	76	Sp
92_JB1206_J_2_I_III_1488005_1488365	JB1206	I	1118423	10	360	+	76	Sp
42_JB1206_EBC138_J_S_02_I_III_1108768_1109128	JB1206_EBC138	I	1118424	10	360	+	76	Sp
149_JB22_J_5_I_166061_166421	JB22	I	1118423	10	360	+	76	Sp
65_JB22_EBC2_J_S_07_I_4474162_4474522	JB22_EBC2	I	1118423	10	360	+	76	Sp
33_JB4_J_1_I_2680283_2680643	JB4	I	1118423	10	360	+	76	Sp
136_JB4_EBC069_J_S_08_I_4396070_4396430	JB4_EBC069	I	1118423	10	360	+	76	Sp
241_JB758_J_2_I_1065243_1065610	JB758	I	1118424	10	367	+	76	Sk
53_JB760_J_18_I_74888_75248	JB760	I	1118423	10	360	+	76	Sp
70_JB760_EBC074_J_S_11_I_2701236_2701596	JB760_EBC074	I	1118433	0	360	+	76	Sp
177_JB837_J_6_I_1112191_1112558	JB837	I	1118424	10	367	+	76	Sk
177_JB840_J_4_I_1067302_1067668	JB840	I	1118424	10	366	+	76	Sk
104_JB842_EBC080_J_S_08_I_2503269_2503629	JB842_EBC080	I	1118423	10	360	+	76	Sp
105_JB853_EBC085_J_S_06_I_2714279_2714645	JB853_EBC085	I	1118423	10	366	+	76	Sk
42_JB854_J_14_I_1067246_1067612	JB854	I	1118424	10	366	+	76	Sk
59_JB858_EBC087_J_S_08_I_982342_982702	JB858_EBC087	I	1118424	10	360	+	76	Sp
156_JB864_J_89_I_268057_268423	JB864	I	1118423	10	366	+	76	Sk
87_JB869_J_2_I_1141513_1141873	JB869	I	1118424	10	360	+	76	Sp
154_JB872_EBC094_J_S_08_I_1139594_1139954	JB872_EBC094	I	1118424	10	360	+	76	Sp
51_JB873_J_16_I_74641_75007	JB873	I	1118423	10	366	+	76	Sk
92_JB873_EBC095_J_S_08_I_2691899_2692265	JB873_EBC095	I	1118423	10	366	+	76	Sk
169_JB874_J_1_I_1140705_1141072	JB874	I	1118424	10	367	+	76	Sk
217_JB879_J_83_I_206931_207291	JB879	I	1118424	10	360	+	76	Sp
104_JB900_EBC131_J_S_1607_I_4464142_4464529	JB900_EBC131	I	1118423	10	387	+	76	Sk
153_JB918_EBC111_J_S_599_II_I_1123841_1124208	JB918_EBC111	I	1118424	10	367	+	76	Sk
81_JB929_J_13_I_61112_61472	JB929	I	1118424	10	360	+	76	Sp
18_JB934_EBC115_J_S_00_I_1028039_1028406	JB934_EBC115	I	1118424	10	367	+	76	Sk
117_JB938_J_61_I_231456_231816	JB938	I	1118433	0	360	+	76	Sp
15_JB939_EBC119_J_S_00_I_1080795_1081155	JB939_EBC119	I	1118424	10	360	+	76	Sk
JB943_200_comp_len367	JB943	I	1118423	10	367	+	76	Sk
18_JB943_J_11_I_2709610_2714525	JB943	I	1118430	400	4915	-	76	Sk
133_JB953_J_1_II_I_4235360_4235727	JB953	I	1118424	10	367	+	76	Sk
Pomberef_183_plus_len357	Pomberef	I	1118423	10	357	+	76	Sp
63_JB1110_EBC121_J_S_07_I_567999_568406	JB1110_EBC121	I	1129400	0	407	-	77	Sk
115_JB1174_EBC132_J_S_00_I_4539043_4539450	JB1174_EBC132	I	1129399	0	407	-	77	Sk
237_JB1180_J_73_I_832866_833273	JB1180	I	1129400	0	407	-	77	Sk
170_JB874_J_1_I_1151732_1152139	JB874	I	1129400	0	407	-	77	Sk
103_JB900_EBC131_J_S_1607_I_4453075_4453482	JB900_EBC131	I	1129399	0	407	-	77	Sk
154_JB918_EBC111_J_S_599_II_I_1134868_1135275	JB918_EBC111	I	1129400	0	407	-	77	Sk
19_JB934_EBC115_J_S_00_I_1039066_1039473	JB934_EBC115	I	1129400	0	407	-	77	Sk
123_JB943_J_11_I_2698567_2698974	JB943	I	1129399	0	407	-	77	Sk
134_JB953_J_1_II_I_4246388_4246795	JB953	I	1129400	0	407	-	77	Sk
168_DY34373_L_1_I_2638913_2639222	DY34373	I	1142637	20	309	-	78	Sk
150_DY39827_L_1_I_2660654_2660963	DY39827	I	1142637	20	309	-	78	Sk
64_JB1110_EBC121_J_S_07_I_581887_582196	JB1110_EBC121	I	1142638	20	309	-	78	Sk
114_JB1174_EBC132_J_S_00_I_4525253_4525562	JB1174_EBC132	I	1142637	20	309	-	78	Sk
238_JB1180_J_73_I_846739_847048	JB1180	I	1142638	20	309	-	78	Sk
205_JB1197_EBC135_J_S_68_I_1374892_1375201	JB1197_EBC135	I	1142638	20	309	-	78	Sk
205_JB1205_EBC137_J_S_23_I_III_1144480_1144789	JB1205_EBC137	I	1142638	20	309	-	78	Sp
91_JB1206_J_2_I_III_1463834_1464143	JB1206	I	1142637	20	309	-	78	Sp
43_JB1206_EBC138_J_S_02_I_III_1132993_1133302	JB1206_EBC138	I	1142638	20	309	-	78	Sp
148_JB22_J_5_I_142109_142366	JB22	I	1139998	2530	257	-	78	Sp
64_JB22_EBC2_J_S_07_I_4449989_4450298	JB22_EBC2	I	1142637	20	309	-	78	Sp
32_JB4_J_1_I_2656110_2656419	JB4	I	1142637	20	309	-	78	Sp
135_JB4_EBC069_J_S_08_I_4371897_4372206	JB4_EBC069	I	1142637	20	309	-	78	Sp
242_JB758_J_2_I_1089796_1090105	JB758	I	1142638	20	309	-	78	Sk
52_JB760_J_18_I_50716_51025	JB760	I	1142637	20	309	-	78	Sp
69_JB760_EBC074_J_S_11_I_2677063_2677372	JB760_EBC074	I	1142637	20	309	-	78	Sp
178_JB837_J_6_I_1136746_1137055	JB837	I	1142638	20	309	-	78	Sk
178_JB840_J_4_I_1091854_1092163	JB840	I	1142638	20	309	-	78	Sk
103_JB842_EBC080_J_S_08_I_2479095_2479404	JB842_EBC080	I	1142637	20	309	-	78	Sp
104_JB853_EBC085_J_S_06_I_2689783_2690092	JB853_EBC085	I	1142637	20	309	-	78	Sk
43_JB854_J_14_I_1091665_1091974	JB854	I	1142638	20	309	-	78	Sk
60_JB858_EBC087_J_S_08_I_1006567_1006876	JB858_EBC087	I	1142638	20	309	-	78	Sp
155_JB864_J_89_I_243841_244150	JB864	I	1142637	20	309	-	78	Sk
88_JB869_J_2_I_1165734_1166043	JB869	I	1142638	20	309	-	78	Sp
155_JB872_EBC094_J_S_08_I_1163818_1164127	JB872_EBC094	I	1142638	20	309	-	78	Sp
50_JB873_J_16_I_50414_50723	JB873	I	1142637	20	309	-	78	Sk
91_JB873_EBC095_J_S_08_I_2667672_2667981	JB873_EBC095	I	1142637	20	309	-	78	Sk
171_JB874_J_1_I_1165620_1165929	JB874	I	1142638	20	309	-	78	Sk
218_JB879_J_83_I_231155_231464	JB879	I	1142638	20	309	-	78	Sp
102_JB900_EBC131_J_S_1607_I_4439285_4439594	JB900_EBC131	I	1142637	20	309	-	78	Sk
155_JB918_EBC111_J_S_599_II_I_1148756_1149065	JB918_EBC111	I	1142638	20	309	-	78	Sk
82_JB929_J_13_I_85334_85643	JB929	I	1142638	20	309	-	78	Sp
20_JB934_EBC115_J_S_00_I_1052954_1053263	JB934_EBC115	I	1142638	20	309	-	78	Sk
116_JB938_J_61_I_207284_207593	JB938	I	1142637	20	309	-	78	Sp
16_JB939_EBC119_J_S_00_I_1105287_1105596	JB939_EBC119	I	1142638	20	309	-	78	Sk
122_JB943_J_11_I_2684777_2685086	JB943	I	1142637	20	309	-	78	Sk
135_JB953_J_1_II_I_4260275_4260584	JB953	I	1142638	20	309	-	78	Sk
Pomberef_184_plus_len240	Pomberef	I	1142635	90	240	+	78	Sp
167_DY34373_L_1_I_2633030_2633215	DY34373	I	1148641	20	185	+	79	Sk
149_DY39827_L_1_I_2654768_2654953	DY39827	I	1148641	20	185	+	79	Sk
65_JB1110_EBC121_J_S_07_I_587899_588077	JB1110_EBC121	I	1148639	30	178	+	79	Sk
113_JB1174_EBC132_J_S_00_I_4519373_4519551	JB1174_EBC132	I	1148638	30	178	+	79	Sk
239_JB1180_J_73_I_852744_852922	JB1180	I	1148639	30	178	+	79	Sk
206_JB1197_EBC135_J_S_68_I_1380910_1381088	JB1197_EBC135	I	1148639	30	178	+	79	Sk
206_JB1205_EBC137_J_S_23_I_III_1150492_1150670	JB1205_EBC137	I	1148639	30	178	+	79	Sp
90_JB1206_J_2_I_III_1457954_1458132	JB1206	I	1148638	30	178	+	79	Sp
44_JB1206_EBC138_J_S_02_I_III_1139005_1139183	JB1206_EBC138	I	1148639	30	178	+	79	Sp
147_JB22_J_5_I_136365_136543	JB22	I	1148638	30	178	+	79	Sp
63_JB22_EBC2_J_S_07_I_4444108_4444286	JB22_EBC2	I	1148638	30	178	+	79	Sp
31_JB4_J_1_I_2650229_2650407	JB4	I	1148638	30	178	+	79	Sp
134_JB4_EBC069_J_S_08_I_4366016_4366194	JB4_EBC069	I	1148638	30	178	+	79	Sp
243_JB758_J_2_I_1095799_1095984	JB758	I	1148632	30	185	+	79	Sk
51_JB760_J_18_I_44835_45013	JB760	I	1148638	30	178	+	79	Sp
68_JB760_EBC074_J_S_11_I_2671182_2671360	JB760_EBC074	I	1148638	30	178	+	79	Sp
179_JB837_J_6_I_1142753_1142938	JB837	I	1148632	30	185	+	79	Sk
179_JB840_J_4_I_1097866_1098044	JB840	I	1148639	30	178	+	79	Sk
102_JB842_EBC080_J_S_08_I_2473215_2473393	JB842_EBC080	I	1148638	30	178	+	79	Sp
103_JB853_EBC085_J_S_06_I_2683904_2684082	JB853_EBC085	I	1148638	30	178	+	79	Sp
44_JB854_J_14_I_1097677_1097855	JB854	I	1148639	30	178	+	79	Sk
61_JB858_EBC087_J_S_08_I_1012578_1012756	JB858_EBC087	I	1148639	30	178	+	79	Sp
154_JB864_J_89_I_237962_238140	JB864	I	1148638	30	178	+	79	Sk
89_JB869_J_2_I_1171745_1171923	JB869	I	1148639	30	178	+	79	Sp
156_JB872_EBC094_J_S_08_I_1169832_1170010	JB872_EBC094	I	1148639	30	178	+	79	Sp
49_JB873_J_16_I_44536_44714	JB873	I	1148638	30	178	+	79	Sk
90_JB873_EBC095_J_S_08_I_2661793_2661971	JB873_EBC095	I	1148638	30	178	+	79	Sk
172_JB874_J_1_I_1171632_1171810	JB874	I	1148639	30	178	+	79	Sk
219_JB879_J_83_I_237165_237343	JB879	I	1148639	30	178	+	79	Sp
101_JB900_EBC131_J_S_1607_I_4433405_4433583	JB900_EBC131	I	1148638	30	178	+	79	Sk
156_JB918_EBC111_J_S_599_II_I_1154770_1154948	JB918_EBC111	I	1148639	30	178	+	79	Sk
83_JB929_J_13_I_91346_91524	JB929	I	1148639	30	178	+	79	Sp
21_JB934_EBC115_J_S_00_I_1058964_1059149	JB934_EBC115	I	1148632	30	185	+	79	Sk
115_JB938_J_61_I_201403_201581	JB938	I	1148638	30	178	+	79	Sp
17_JB939_EBC119_J_S_00_I_1111300_1111478	JB939_EBC119	I	1148639	30	178	+	79	Sk
121_JB943_J_11_I_2678895_2679073	JB943	I	1148638	30	178	+	79	Sk
136_JB953_J_1_II_I_4266281_4266459	JB953	I	1148639	30	178	+	79	Sk
244_JB758_J_2_I_1127463_1127833	JB758	I	1180114	10	370	+	80	Sk
84_JB929_J_13_I_122707_127955	JB929	I	1179990	30	5248	+	80	Sp
166_DY34373_L_1_I_2589577_2589909	DY34373	I	1191724	0	332	+	81	Sk
148_DY39827_L_1_I_2611318_2611651	DY39827	I	1191724	0	333	+	81	Sk
66_JB1110_EBC121_J_S_07_I_625135_638487	JB1110_EBC121	I	1185612	10	13352	+	81	Sk
67_JB1110_EBC121_J_S_09_I_3_10688	JB1110_EBC121	I	1185626	10	10685	+	81	Sk
68_JB1110_EBC121_J_S_09_I_17017_17117	JB1110_EBC121	I	1191716	230	100	+	81	Sk
13_JB1174_EBC132_J_S_00_I_4477375_4482315	JB1174_EBC132	I	1185611	10	4940	-	81	Sk
112_JB1174_EBC132_J_S_00_I_4470947_4471047	JB1174_EBC132	I	1191715	230	100	+	81	Sk
240_JB1180_J_73_I_896271_896371	JB1180	I	1191716	230	100	+	81	Sk
207_JB1197_EBC135_J_S_68_I_1424500_1424600	JB1197_EBC135	I	1191716	230	100	+	81	Sk
207_JB1205_EBC137_J_S_23_I_III_1193766_1194099	JB1205_EBC137	I	1191715	10	333	+	81	Sp
89_JB1206_J_2_I_III_1414525_1414858	JB1206	I	1191724	0	333	+	81	Sp
45_JB1206_EBC138_J_S_02_I_III_1182279_1182612	JB1206_EBC138	I	1191715	10	333	+	81	Sp
146_JB22_J_5_I_93155_93488	JB22	I	1191724	0	333	+	81	Sp
62_JB22_EBC2_J_S_07_I_4400895_4401228	JB22_EBC2	I	1191724	0	333	+	81	Sp
30_JB4_J_1_I_2607009_2607347	JB4	I	1191724	0	338	+	81	Sp
133_JB4_EBC069_J_S_08_I_4322796_4323134	JB4_EBC069	I	1191724	0	338	+	81	Sp
245_JB758_J_2_I_1139424_1139757	JB758	I	1191715	10	333	+	81	Sk
96_JB760_J_22_I_III_356576_356914	JB760	I	1191724	0	338	+	81	Sp
67_JB760_EBC074_J_S_11_I_2627958_2628296	JB760_EBC074	I	1191724	0	338	+	81	Sp
180_JB837_J_6_I_1186034_1186367	JB837	I	1191715	10	333	+	81	Sk
180_JB840_J_4_I_1141203_1141538	JB840	I	1191715	10	335	+	81	Sk
101_JB842_EBC080_J_S_08_I_2429940_2430275	JB842_EBC080	I	1191724	0	335	+	81	Sk
102_JB853_EBC085_J_S_06_I_2640629_2640962	JB853_EBC085	I	1191724	0	333	+	81	Sp
45_JB854_J_14_I_1141023_1141360	JB854	I	1191715	10	337	+	81	Sk
62_JB858_EBC087_J_S_08_I_1055636_1055969	JB858_EBC087	I	1191715	10	333	+	81	Sp
153_JB864_J_89_I_194490_194825	JB864	I	1191724	0	335	+	81	Sk
90_JB869_J_2_I_1214795_1215128	JB869	I	1191715	10	333	+	81	Sp
157_JB872_EBC094_J_S_08_I_1213127_1213227	JB872_EBC094	I	1191716	230	100	+	81	Sk
48_JB873_J_16_I_1087_1424	JB873	I	1191724	0	337	+	81	Sk
89_JB873_EBC095_J_S_08_I_2618346_2618683	JB873_EBC095	I	1191724	0	337	+	81	Sk
173_JB874_J_1_I_1215125_1215291	JB874	I	1191720	160	166	-	81	Sk
55_JB879_J_33_I_73310_73643	JB879	I	1191724	0	333	+	81	Sp
12_JB900_EBC131_J_S_1607_I_4391407_4396347	JB900_EBC131	I	1185611	10	4940	-	81	Sk
100_JB900_EBC131_J_S_1607_I_4384979_4385079	JB900_EBC131	I	1191715	230	100	+	81	Sk
157_JB918_EBC111_J_S_599_II_I_1198105_1198438	JB918_EBC111	I	1191715	10	333	+	81	Sp
85_JB929_J_13_I_139714_140047	JB929	I	1191715	10	333	+	81	Sp
22_JB934_EBC115_J_S_00_I_1102297_1102635	JB934_EBC115	I	1191715	10	338	+	81	Sp
114_JB938_J_61_I_158183_158516	JB938	I	1191724	0	333	+	81	Sp
18_JB939_EBC119_J_S_00_I_1154625_1154960	JB939_EBC119	I	1191715	10	335	+	81	NA
120_JB943_J_11_I_2635411_2635511	JB943	I	1191715	230	100	+	81	Sk
137_JB953_J_1_II_I_4309834_4309934	JB953	I	1191716	230	100	+	81	Sk
8_JB929_J_13_I_164673_169613	JB929	I	1216674	10	4940	+	82	Sp
18_JB874_J_1_I_1262140_1267080	JB874	I	1238868	10	4940	+	83	Sk
69_JB1110_EBC121_J_S_09_I_90951_91308	JB1110_EBC121	I	1265799	10	357	+	84	Sp
241_JB1180_J_73_I_970180_970537	JB1180	I	1265799	10	357	+	84	Sp
208_JB1205_EBC137_J_S_23_I_III_1267890_1268247	JB1205_EBC137	I	1265799	10	357	+	84	Sp
88_JB1206_J_2_I_III_1340390_1340747	JB1206	I	1265798	10	357	+	84	Sp
46_JB1206_EBC138_J_S_02_I_III_1256403_1256760	JB1206_EBC138	I	1265799	10	357	+	84	Sp
145_JB22_J_5_I_19052_19409	JB22	I	1265798	10	357	+	84	Sp
61_JB22_EBC2_J_S_07_I_4326787_4327144	JB22_EBC2	I	1265798	10	357	+	84	Sp
29_JB4_J_1_I_2532906_2533263	JB4	I	1265798	10	357	+	84	Sp
132_JB4_EBC069_J_S_08_I_4248693_4249050	JB4_EBC069	I	1265798	10	357	+	84	Sp
95_JB760_J_22_I_III_282485_282842	JB760	I	1265798	10	357	+	84	Sp
66_JB760_EBC074_J_S_11_I_2553857_2554214	JB760_EBC074	I	1265798	10	357	+	84	Sp
181_JB840_J_4_I_1215285_1215642	JB840	I	1265799	10	357	+	84	Sp
100_JB842_EBC080_J_S_08_I_2355842_2356199	JB842_EBC080	I	1265798	10	357	+	84	Sp
101_JB853_EBC085_J_S_06_I_2566521_2566878	JB853_EBC085	I	1265798	10	357	+	84	Sp
63_JB858_EBC087_J_S_08_I_1129718_1130075	JB858_EBC087	I	1265799	10	357	+	84	Sp
91_JB869_J_2_I_1288871_1289228	JB869	I	1265799	10	357	+	84	Sp
83_JB873_J_21_I_187357_187714	JB873	I	1265798	10	357	+	84	Sp
88_JB873_EBC095_J_S_08_I_2544241_2544598	JB873_EBC095	I	1265798	10	357	+	84	Sp
174_JB874_J_1_I_1294016_1294373	JB874	I	1265799	10	357	+	84	Sp
158_JB918_EBC111_J_S_599_II_I_1272189_1272546	JB918_EBC111	I	1265799	10	357	+	84	Sp
86_JB929_J_13_I_218745_219102	JB929	I	1265799	10	357	+	84	Sp
23_JB934_EBC115_J_S_00_I_1176506_1176863	JB934_EBC115	I	1265799	10	357	+	84	Sp
113_JB938_J_61_I_84206_84448	JB938	I	1265766	40	242	+	84	Sp
112_JB938_J_61_I_59443_59800	JB938	I	1265798	10	357	+	84	Sp
119_JB943_J_11_I_2561222_2561579	JB943	I	1265798	10	357	+	84	Sp
Pomberef_186_comp_len357	Pomberef	I	1265799	10	357	-	84	Sp
8_JB1205_EBC137_J_S_23_I_III_1318037_1322977	JB1205_EBC137	I	1315940	10	4940	+	85	Sp
4_JB1206_J_2_I_III_1066577_1071517	JB1206	I	1315945	0	4940	+	85	Sp
6_JB1206_J_2_I_III_1285667_1290607	JB1206	I	1315949	0	4940	+	85	Sp
3_JB1206_EBC138_J_S_02_I_III_1306550_1311490	JB1206_EBC138	I	1315940	10	4940	+	85	Sp
158_JB872_EBC094_J_S_08_I_1336841_1337198	JB872_EBC094	I	1315894	10	357	-	85	Sk
138_JB953_J_1_II_I_4433535_4433892	JB953	I	1315894	10	357	-	85	Sk
246_JB758_J_2_I_1282789_1283139	JB758	I	1335405	10	350	-	86	Sk
55_JB1180_J_73_I_1079889_1084802	JB1180	I	1375586	10	4913	-	87	Sp
247_JB758_J_2_I_1329564_1329981	JB758	I	1381764	10	417	+	88	Sk
165_DY34373_L_1_I_2382970_2383279	DY34373	I	1398627	0	309	+	89	Sk
147_DY39827_L_1_I_2404704_2405013	DY39827	I	1398627	0	309	+	89	Sk
70_JB1110_EBC121_J_S_09_I_223759_224080	JB1110_EBC121	I	1398616	0	321	-	89	Sp
111_JB1174_EBC132_J_S_00_I_4264325_4264646	JB1174_EBC132	I	1398615	0	321	-	89	Sp
242_JB1180_J_73_I_1107825_1108146	JB1180	I	1398616	0	321	-	89	Sp
208_JB1197_EBC135_J_S_68_I_1630991_1631312	JB1197_EBC135	I	1398616	0	321	-	89	Sk
210_JB1205_EBC137_J_S_23_I_III_1454140_1454461	JB1205_EBC137	I	1398615	0	321	-	89	Sk
86_JB1206_J_2_I_III_1154186_1154507	JB1206	I	1398616	0	321	-	89	Sk
48_JB1206_EBC138_J_S_02_I_III_1442654_1442975	JB1206_EBC138	I	1398615	0	321	-	89	Sk
120_JB22_J_24_I_112630_112951	JB22	I	1398616	0	321	-	89	Sp
60_JB22_EBC2_J_S_07_I_4194013_4194334	JB22_EBC2	I	1398615	0	321	-	89	Sp
28_JB4_J_1_I_2400136_2400457	JB4	I	1398615	0	321	-	89	Sp
131_JB4_EBC069_J_S_08_I_4115922_4116243	JB4_EBC069	I	1398615	0	321	-	89	Sp
248_JB758_J_2_I_1346778_1347446	JB758	I	1398612	10	668	+	89	Sk
94_JB760_J_22_I_III_149725_150046	JB760	I	1398615	0	321	-	89	Sp
65_JB760_EBC074_J_S_11_I_2421094_2421415	JB760_EBC074	I	1398615	0	321	-	89	Sp
181_JB837_J_6_I_1392612_1392933	JB837	I	1398616	0	321	-	89	Sk
182_JB840_J_4_I_1348092_1348412	JB840	I	1398616	0	320	-	89	Sk
99_JB842_EBC080_J_S_08_I_2223073_2223393	JB842_EBC080	I	1398615	0	320	-	89	Sk
100_JB853_EBC085_J_S_06_I_2433759_2434080	JB853_EBC085	I	1398615	0	321	-	89	Sp
125_JB854_J_3_I_20835_21163	JB854	I	1398616	0	328	-	89	Sp
64_JB858_EBC087_J_S_08_I_1262520_1262840	JB858_EBC087	I	1398616	0	320	-	89	Sk
152_JB864_J_85_I_521080_521400	JB864	I	1398615	0	320	-	89	Sk
92_JB869_J_2_I_1421647_1421968	JB869	I	1398616	0	321	-	89	Sp
159_JB872_EBC094_J_S_08_I_1420009_1420330	JB872_EBC094	I	1398616	0	321	-	89	Sk
82_JB873_J_21_I_54598_54919	JB873	I	1398615	0	321	-	89	Sp
87_JB873_EBC095_J_S_08_I_2411479_2411800	JB873_EBC095	I	1398615	0	321	-	89	Sp
175_JB874_J_1_I_1426813_1427134	JB874	I	1398616	0	321	-	89	Sp
184_JB879_J_76_I_189464_194715	JB879	I	1398619	0	5251	+	89	Sp
99_JB900_EBC131_J_S_1607_I_4178355_4178676	JB900_EBC131	I	1398615	0	321	-	89	Sp
159_JB918_EBC111_J_S_599_II_I_1404996_1405317	JB918_EBC111	I	1398616	0	321	-	89	Sp
132_JB929_J_2_I_1647924_1648245	JB929	I	1398615	0	321	-	89	Sp
24_JB934_EBC115_J_S_00_I_1309315_1309643	JB934_EBC115	I	1398616	0	328	-	89	Sp
111_JB938_J_60_I_142083_142404	JB938	I	1398615	0	321	-	89	Sp
19_JB939_EBC119_J_S_00_I_1361284_1361604	JB939_EBC119	I	1398616	0	320	-	89	Sk
118_JB943_J_11_I_2428444_2428765	JB943	I	1398615	0	321	-	89	Sp
139_JB953_J_1_II_I_4516691_4517012	JB953	I	1398616	0	321	-	89	Sk
126_JB854_J_3_I_33523_33873	JB854	I	1411295	10	350	-	90	Sp
12_JB842_EBC080_J_S_08_I_2198232_2203147	JB842_EBC080	I	1418864	10	4915	+	91	Sk
26_JB918_EBC111_J_S_599_II_I_1447004_1451857	JB918_EBC111	I	1440615	10	4853	-	92	Sp
164_DY34373_L_1_I_2337204_2337581	DY34373	I	1444272	20	377	+	93	Sk
146_DY39827_L_1_I_2358937_2359314	DY39827	I	1444272	20	377	+	93	Sk
71_JB1110_EBC121_J_S_09_I_269435_269814	JB1110_EBC121	I	1444273	20	379	+	93	Sp
110_JB1174_EBC132_J_S_00_I_4218591_4218970	JB1174_EBC132	I	1444272	20	379	+	93	Sp
243_JB1180_J_73_I_1153484_1153863	JB1180	I	1444273	20	379	+	93	Sp
209_JB1197_EBC135_J_S_68_I_1676689_1677066	JB1197_EBC135	I	1444273	20	377	+	93	Sk
209_JB1205_EBC137_J_S_23_I_III_1408388_1408765	JB1205_EBC137	I	1444272	20	377	+	93	Sk
87_JB1206_J_2_I_III_1199882_1200259	JB1206	I	1444273	20	377	+	93	Sk
47_JB1206_EBC138_J_S_02_I_III_1396902_1397279	JB1206_EBC138	I	1444272	20	377	+	93	Sk
121_JB22_J_24_I_158297_158676	JB22	I	1444273	20	379	+	93	Sp
59_JB22_EBC2_J_S_07_I_4148279_4148658	JB22_EBC2	I	1444272	20	379	+	93	Sp
27_JB4_J_1_I_2354397_2354776	JB4	I	1444272	20	379	+	93	Sp
130_JB4_EBC069_J_S_08_I_4070182_4070561	JB4_EBC069	I	1444272	20	379	+	93	Sp
249_JB758_J_2_I_1392823_1393200	JB758	I	1444274	20	377	+	93	Sk
93_JB760_J_22_I_III_103993_104372	JB760	I	1444272	20	379	+	93	Sp
64_JB760_EBC074_J_S_11_I_2375360_2375739	JB760_EBC074	I	1444272	20	379	+	93	Sp
182_JB837_J_6_I_1438307_1438670	JB837	I	1444271	20	363	-	93	Sk
183_JB840_J_4_I_1393793_1394171	JB840	I	1444273	20	378	+	93	Sk
98_JB842_EBC080_J_S_08_I_2172393_2172771	JB842_EBC080	I	1444272	20	378	+	93	Sk
99_JB853_EBC085_J_S_06_I_2388025_2388404	JB853_EBC085	I	1444272	20	379	+	93	Sp
127_JB854_J_3_I_66864_67243	JB854	I	1444273	20	379	+	93	Sp
65_JB858_EBC087_J_S_08_I_1308212_1308590	JB858_EBC087	I	1444273	20	378	+	93	Sk
151_JB864_J_85_I_475329_475707	JB864	I	1444272	20	378	+	93	Sk
93_JB869_J_2_I_1467309_1467688	JB869	I	1444273	20	379	+	93	Sp
160_JB872_EBC094_J_S_08_I_1465708_1466085	JB872_EBC094	I	1444273	20	377	+	93	Sk
81_JB873_J_21_I_8864_9243	JB873	I	1444272	20	379	+	93	Sp
86_JB873_EBC095_J_S_08_I_2365745_2366124	JB873_EBC095	I	1444272	20	379	+	93	Sp
176_JB874_J_1_I_1472489_1472868	JB874	I	1444273	20	379	+	93	Sp
183_JB879_J_76_I_143746_144125	JB879	I	1444272	20	379	+	93	Sp
98_JB900_EBC131_J_S_1607_I_4132621_4133000	JB900_EBC131	I	1444272	20	379	+	93	Sp
160_JB918_EBC111_J_S_599_II_I_1455531_1455910	JB918_EBC111	I	1444273	20	379	+	93	Sp
131_JB929_J_2_I_1602019_1602398	JB929	I	1444272	20	379	+	93	Sp
25_JB934_EBC115_J_S_00_I_1355001_1355380	JB934_EBC115	I	1444273	20	379	+	93	Sp
110_JB938_J_60_I_96338_96717	JB938	I	1444272	20	379	+	93	Sp
20_JB939_EBC119_J_S_00_I_1406982_1407360	JB939_EBC119	I	1444273	20	378	+	93	Sk
117_JB943_J_11_I_2382704_2383083	JB943	I	1444272	20	379	+	93	Sp
140_JB953_J_1_II_I_4562383_4562760	JB953	I	1444273	20	377	+	93	Sk
Pomberef_187_plus_len364	Pomberef	I	1444271	20	364	+	93	Sp
5_JB22_J_24_I_179335_184249	JB22	I	1465322	10	4914	-	94	Sp
4_JB22_EBC2_J_S_07_I_4122705_4127619	JB22_EBC2	I	1465321	10	4914	-	94	Sp
92_JB760_J_22_I_III_78853_83403	JB760	I	1464426	840	4550	-	94	Sp
6_JB760_EBC074_J_S_11_I_2349786_2354700	JB760_EBC074	I	1465321	10	4914	-	94	Sp
27_JB918_EBC111_J_S_599_II_I_1476650_1481588	JB918_EBC111	I	1470319	10	4938	+	94	Sp
5_Pomberef_I_1465332_1470247	Pomberef	I	1465322	10	4915	-	94	Sp
12_JB1174_EBC132_J_S_00_I_4192526_4197466	JB1174_EBC132	I	1470707	10	4940	+	95	Sp
11_JB900_EBC131_J_S_1607_I_4106556_4111496	JB900_EBC131	I	1470707	10	4940	+	95	Sp
174_JB873_J_50_38_543	JB873	I	1487074	2250	505	+	96	Sp
97_JB842_EBC080_J_S_08_I_2131362_2131970	JB842_EBC080	I	1489930	10	608	+	97	Sk
9_JB1205_EBC137_J_S_23_I_III_1358984_1363923	JB1205_EBC137	I	1493960	10	4939	+	98	Sk
5_JB1206_J_2_I_III_1244724_1249663	JB1206	I	1493961	10	4939	+	98	Sk
4_JB1206_EBC138_J_S_02_I_III_1347498_1352437	JB1206_EBC138	I	1493960	10	4939	+	98	Sk
17_JB840_J_4_I_1438695_1443610	JB840	I	1494031	10	4915	+	98	Sp
3_JB1205_EBC137_J_S_15_I_III_2273621_2278561	JB1205_EBC137	I	1529900	0	4940	+	99	Sk
8_JB1206_J_5_I_III_1247996_1252936	JB1206	I	1529903	0	4940	-	99	Sk
8_JB1206_EBC138_J_S_16_I_III_1226118_1231058	JB1206_EBC138	I	1529903	0	4940	-	99	Sk
19_JB837_J_6_I_1519131_1521674	JB837	I	1529898	10	2543	-	99	Sk
19_JB874_J_1_I_1553259_1558199	JB874	I	1529898	10	4940	-	99	Sk
29_JB1197_EBC135_J_S_68_I_1770089_1775022	JB1197_EBC135	I	1542425	10	4933	+	100	Sk
72_JB1110_EBC121_J_S_09_I_384068_393557	JB1110_EBC121	I	1563798	20	9489	+	101	Sp
109_JB1174_EBC132_J_S_00_I_4099047_4099409	JB1174_EBC132	I	1563806	10	362	+	101	Sp
128_JB1180_J_23_I_45076_45438	JB1180	I	1563807	10	362	+	101	Sp
7_JB22_J_24_I_277812_282727	JB22	I	1563807	10	4915	+	101	Sp
3_JB22_EBC2_J_S_07_I_4024217_4029132	JB22_EBC2	I	1563806	10	4915	+	101	Sp
26_JB4_J_1_I_2239798_2240160	JB4	I	1563806	10	362	+	101	Sp
129_JB4_EBC069_J_S_08_I_3955582_3955944	JB4_EBC069	I	1563806	10	362	+	101	Sp
187_JB760_J_37_I_14175_14877	JB760	I	1563807	10	702	+	101	Sp
63_JB760_EBC074_J_S_11_I_2255529_2256231	JB760_EBC074	I	1563806	10	702	+	101	Sp
20_JB837_J_6_I_1555613_1560924	JB837	I	1563807	10	5311	+	101	Sp
18_JB840_J_4_I_1513384_1518299	JB840	I	1563807	10	4915	+	101	Sp
96_JB842_EBC080_J_S_08_I_2057075_2057437	JB842_EBC080	I	1563806	10	362	+	101	Sp
12_JB853_EBC085_J_S_06_I_2268891_2273806	JB853_EBC085	I	1563806	10	4915	+	101	Sp
4_JB854_J_3_I_181466_186381	JB854	I	1563807	10	4915	+	101	Sp
8_JB858_EBC087_J_S_08_I_1422942_1428211	JB858_EBC087	I	1563807	10	5269	+	101	Sp
3_JB869_J_2_I_1581906_1586821	JB869	I	1563807	10	4915	+	101	Sp
161_JB872_EBC094_J_S_08_I_1580399_1580761	JB872_EBC094	I	1563807	10	362	+	101	Sp
39_JB873_J_12_I_8711_13599	JB873	I	1563803	10	4888	-	101	Sp
5_JB873_EBC095_J_S_08_I_2246253_2251522	JB873_EBC095	I	1563806	10	5269	+	101	Sp
182_JB879_J_76_I_28855_29557	JB879	I	1563806	10	702	+	101	Sp
97_JB900_EBC131_J_S_1607_I_4013074_4013436	JB900_EBC131	I	1563806	10	362	+	101	Sp
161_JB918_EBC111_J_S_599_II_I_1575105_1580027	JB918_EBC111	I	1563798	20	4922	+	101	Sp
15_JB929_J_2_I_1482882_1487797	JB929	I	1563806	10	4915	+	101	Sp
26_JB934_EBC115_J_S_00_I_1469599_1469961	JB934_EBC115	I	1563807	10	362	+	101	Sp
74_JB938_J_57_I_14700_15402	JB938	I	1563807	10	702	+	101	Sp
116_JB943_J_11_I_2268126_2268488	JB943	I	1563806	10	362	+	101	Sp
6_Pomberef_I_1563817_1568732	Pomberef	I	1563807	10	4915	+	101	Sp
183_JB837_J_6_I_1566254_1566604	JB837	I	1574072	10	350	-	102	Sp
13_JB1110_EBC121_J_S_09_I_407344_409248	JB1110_EBC121	I	1582508	10	1904	+	103	Sp
28_JB918_EBC111_J_S_599_II_I_1622660_1627575	JB918_EBC111	I	1611399	10	4915	+	104	Sp
163_DY34373_L_1_I_2127560_2127897	DY34373	I	1663492	0	337	+	105	Sk
145_DY39827_L_1_I_2149256_2149593	DY39827	I	1663492	0	337	+	105	Sk
73_JB1110_EBC121_J_S_09_I_490195_490528	JB1110_EBC121	I	1663488	10	333	+	105	Sp
108_JB1174_EBC132_J_S_00_I_4003926_4004259	JB1174_EBC132	I	1663497	0	333	+	105	Sp
129_JB1180_J_23_I_140098_140435	JB1180	I	1663493	0	337	+	105	Sp
210_JB1197_EBC135_J_S_68_I_1891347_1891678	JB1197_EBC135	I	1663488	10	331	+	105	Sk
94_JB1205_EBC137_J_S_15_I_III_2144409_2144740	JB1205_EBC137	I	1663497	0	331	+	105	Sk
154_JB1206_J_5_I_III_1381803_1382133	JB1206	I	1663488	10	330	+	105	Sk
157_JB1206_EBC138_J_S_16_I_III_1359937_1360268	JB1206_EBC138	I	1663488	10	331	+	105	Sk
122_JB22_J_24_I_377485_377819	JB22	I	1663488	10	334	+	105	Sp
58_JB22_EBC2_J_S_07_I_3929112_3929446	JB22_EBC2	I	1663497	0	334	+	105	Sp
25_JB4_J_1_I_2144661_2144994	JB4	I	1663497	0	333	+	105	Sp
128_JB4_EBC069_J_S_08_I_3860442_3860775	JB4_EBC069	I	1663497	0	333	+	105	Sp
250_JB758_J_2_I_1602540_1602871	JB758	I	1663488	10	331	+	105	Sk
9_JB760_J_37_I_109588_114310	JB760	I	1663432	10	4722	-	105	Sp
188_JB760_J_37_I_114372_114706	JB760	I	1663488	10	334	+	105	Sp
5_JB760_EBC074_J_S_11_I_2156096_2160818	JB760_EBC074	I	1663431	10	4722	-	105	Sp
62_JB760_EBC074_J_S_11_I_2155700_2156034	JB760_EBC074	I	1663497	0	334	+	105	Sp
184_JB837_J_6_I_1656064_1656395	JB837	I	1663488	10	331	+	105	Sp
184_JB840_J_4_I_1613114_1613447	JB840	I	1663488	10	333	+	105	Sp
95_JB842_EBC080_J_S_08_I_1961937_1962270	JB842_EBC080	I	1663497	0	333	+	105	Sp
98_JB853_EBC085_J_S_06_I_2173737_2174070	JB853_EBC085	I	1663497	0	333	+	105	Sp
128_JB854_J_3_I_281175_281508	JB854	I	1663488	10	333	+	105	Sp
66_JB858_EBC087_J_S_08_I_1523032_1523365	JB858_EBC087	I	1663488	10	333	+	105	Sp
150_JB864_J_85_I_265858_266194	JB864	I	1663492	0	336	+	105	Sk
94_JB869_J_2_I_1681566_1681900	JB869	I	1663488	10	334	+	105	Sp
162_JB872_EBC094_J_S_08_I_1675569_1675902	JB872_EBC094	I	1663488	10	333	+	105	Sp
108_JB873_J_33_I_86581_86913	JB873	I	1663488	10	332	+	105	Sp
85_JB873_EBC095_J_S_08_I_2151097_2151430	JB873_EBC095	I	1663497	0	333	+	105	Sp
177_JB874_J_1_I_1687077_1687408	JB874	I	1663488	10	331	+	105	Sk
2_JB879_J_39_I_26826_31548	JB879	I	1663432	10	4722	-	105	Sp
73_JB879_J_39_I_31610_31944	JB879	I	1663488	10	334	+	105	Sp
96_JB900_EBC131_J_S_1607_I_3917953_3918286	JB900_EBC131	I	1663497	0	333	+	105	Sp
162_JB918_EBC111_J_S_599_II_I_1679675_1680008	JB918_EBC111	I	1663488	10	333	+	105	Sp
130_JB929_J_2_I_1387881_1388212	JB929	I	1663497	0	331	+	105	Sk
27_JB934_EBC115_J_S_00_I_1564762_1565093	JB934_EBC115	I	1663488	10	331	+	105	Sk
75_JB938_J_57_I_110216_110550	JB938	I	1663488	10	334	+	105	Sp
21_JB939_EBC119_J_S_00_I_1616616_1616952	JB939_EBC119	I	1663493	0	336	+	105	Sk
115_JB943_J_11_I_2173086_2173417	JB943	I	1663497	0	331	+	105	Sk
141_JB953_J_1_II_I_4772023_4772354	JB953	I	1663488	10	331	+	105	Sk
Pomberef_200_plus_len334	Pomberef	I	1663488	10	334	+	105	Sp
10_JB1174_EBC132_J_S_00_I_3958548_3963488	JB1174_EBC132	I	1704238	10	4940	-	106	Sp
10_JB900_EBC131_J_S_1607_I_3872575_3877515	JB900_EBC131	I	1704238	10	4940	-	106	Sp
6_JB1180_J_10_I_563580_567631	JB1180	I	1739860	10	4051	+	107	Sk
5_JB1180_J_10_I_512279_517216	JB1180	I	1786240	10	4937	+	108	Sk
14_JB929_J_2_I_1235325_1240265	JB929	I	1811424	10	4940	-	109	Sk
4_JB1180_J_10_I_477161_482075	JB1180	I	1816497	0	4914	-	110	Sk
20_JB874_J_1_I_1844578_1849493	JB874	I	1820494	10	4915	-	111	Sk
1_JB934_EBC115_J_S_00_I_1733877_1738817	JB934_EBC115	I	1831977	10	4940	-	112	Sk
3_JB1180_J_10_I_453878_458816	JB1180	I	1834825	10	4938	+	113	Sk
22_JB872_EBC094_J_S_08_I_1846885_1851825	JB872_EBC094	I	1834826	10	4940	+	113	Sp
97_JB853_EBC085_J_S_06_I_1998422_1998779	JB853_EBC085	I	1838443	10	357	-	114	Sk
14_JB1110_EBC121_J_S_09_I_708430_713345	JB1110_EBC121	I	1882058	30	4915	-	115	Sk
251_JB758_J_2_I_1821419_1821808	JB758	I	1882058	30	389	-	115	Sk
2_JB1180_J_10_I_397013_401952	JB1180	I	1887041	10	4939	+	116	Sk
11_JB842_EBC080_J_S_08_I_1723425_1728340	JB842_EBC080	I	1897336	10	4915	-	117	Sk
34_JB873_J_11_I_163785_165190	JB873	I	1897301	10	1405	+	117	Sp
84_JB873_EBC095_J_S_08_I_1916028_1917433	JB873_EBC095	I	1897310	0	1405	+	117	Sp
17_JB943_J_11_I_1934352_1939292	JB943	I	1897345	10	4940	-	117	Sk
32_JB758_J_2_I_1855705_1860645	JB758	I	1915917	10	4940	-	118	Sp
23_JB872_EBC094_J_S_08_I_1986084_1988595	JB872_EBC094	I	1968777	10	2511	+	119	Sp
21_JB874_J_1_I_1997777_2002692	JB874	I	1968777	10	4915	+	119	Sk
162_DY34373_L_1_I_1790351_1790663	DY34373	I	1999634	30	312	+	120	Sk
144_DY39827_L_1_I_1811996_1812308	DY39827	I	1999634	30	312	+	120	Sk
74_JB1110_EBC121_J_S_09_I_831044_831356	JB1110_EBC121	I	1999635	30	312	+	120	Sp
107_JB1174_EBC132_J_S_00_I_3662705_3663019	JB1174_EBC132	I	1999634	30	314	+	120	Sk
74_JB1180_J_10_I_284057_284370	JB1180	I	1999634	30	313	+	120	Sp
211_JB1197_EBC135_J_S_68_I_2228698_2229010	JB1197_EBC135	I	1999635	30	312	+	120	Sk
2_JB1205_EBC137_J_S_15_I_III_1803568_1808483	JB1205_EBC137	I	1999591	10	4915	+	120	Sp
93_JB1205_EBC137_J_S_15_I_III_1803185_1803499	JB1205_EBC137	I	1999634	30	314	+	120	Sp
155_JB1206_J_5_I_III_1718026_1722945	JB1206	I	1999588	10	4919	-	120	Sp
156_JB1206_J_5_I_III_1723014_1723328	JB1206	I	1999635	30	314	+	120	Sp
158_JB1206_EBC138_J_S_16_I_III_1696191_1701110	JB1206_EBC138	I	1999588	10	4919	-	120	Sp
159_JB1206_EBC138_J_S_16_I_III_1701179_1701491	JB1206_EBC138	I	1999635	30	312	+	120	Sp
123_JB22_J_24_I_713595_713909	JB22	I	1999635	30	314	+	120	Sp
57_JB22_EBC2_J_S_07_I_3592956_3593268	JB22_EBC2	I	1999634	30	312	+	120	Sp
24_JB4_J_1_I_1808407_1808719	JB4	I	1999634	30	312	+	120	Sp
127_JB4_EBC069_J_S_08_I_3524184_3524496	JB4_EBC069	I	1999634	30	312	+	120	Sp
252_JB758_J_2_I_1944457_1944769	JB758	I	1999635	30	312	+	120	Sk
189_JB760_J_37_I_451091_451403	JB760	I	1999635	30	312	+	120	Sp
61_JB760_EBC074_J_S_11_I_1819515_1819829	JB760_EBC074	I	1999634	30	314	+	120	Sp
185_JB837_J_6_I_1991924_1992238	JB837	I	1999635	30	314	+	120	Sk
185_JB840_J_4_I_1949175_1949487	JB840	I	1999635	30	312	+	120	Sp
94_JB842_EBC080_J_S_08_I_1620750_1621062	JB842_EBC080	I	1999634	30	312	+	120	Sk
96_JB853_EBC085_J_S_06_I_1836854_1837168	JB853_EBC085	I	1999634	30	314	+	120	Sk
129_JB854_J_3_I_617479_617791	JB854	I	1999635	30	312	+	120	Sp
67_JB858_EBC087_J_S_08_I_1859547_1859859	JB858_EBC087	I	1999635	30	312	+	120	Sk
136_JB864_J_69_I_II_2736007_2736321	JB864	I	1999634	30	314	+	120	Sk
95_JB869_J_2_I_2017834_2018148	JB869	I	1999635	30	314	+	120	Sp
163_JB872_EBC094_J_S_08_I_2019477_2019791	JB872_EBC094	I	1999635	30	314	+	120	Sp
35_JB873_J_11_I_267589_267901	JB873	I	1999635	30	312	+	120	Sp
83_JB873_EBC095_J_S_08_I_1813316_1813628	JB873_EBC095	I	1999634	30	312	+	120	Sp
178_JB874_J_1_I_2033502_2043349	JB874	I	1999592	10	9847	+	120	Sk
50_JB879_J_30_I_55573_55887	JB879	I	1999635	30	314	+	120	Sp
95_JB900_EBC131_J_S_1607_I_3576729_3577041	JB900_EBC131	I	1999634	30	312	+	120	Sk
163_JB918_EBC111_J_S_599_II_I_2015672_2015984	JB918_EBC111	I	1999635	30	312	+	120	Sp
129_JB929_J_2_I_1046518_1046830	JB929	I	1999634	30	312	+	120	Sp
28_JB934_EBC115_J_S_00_I_1906480_1906794	JB934_EBC115	I	1999635	30	314	+	120	Sp
76_JB938_J_57_I_446253_446565	JB938	I	1999635	30	312	+	120	Sp
22_JB939_EBC119_J_S_00_I_1953728_1954040	JB939_EBC119	I	1999635	30	312	+	120	Sk
114_JB943_J_11_I_1831682_1831996	JB943	I	1999634	30	314	+	120	Sk
142_JB953_J_1_II_I_5109211_5109523	JB953	I	1999635	30	312	+	120	Sk
Pomberef_202_plus_len283	Pomberef	I	1999635	30	283	+	120	Sp
75_JB1110_EBC121_J_S_09_I_843391_843740	JB1110_EBC121	I	2012002	10	349	+	121	Sp
73_JB1180_J_10_I_271677_272070	JB1180	I	2011967	0	393	-	121	Sp
92_JB1205_EBC137_J_S_15_I_III_1790803_1791196	JB1205_EBC137	I	2011967	0	393	-	121	Sp
157_JB1206_J_5_I_III_1735317_1735710	JB1206	I	2011968	0	393	-	121	Sp
160_JB1206_EBC138_J_S_16_I_III_1713526_1713875	JB1206_EBC138	I	2012002	10	349	+	121	Sp
124_JB22_J_24_I_725897_726290	JB22	I	2011968	0	393	-	121	Sp
56_JB22_EBC2_J_S_07_I_3580572_3580965	JB22_EBC2	I	2011967	0	393	-	121	Sp
23_JB4_J_1_I_1796023_1796372	JB4	I	2012001	10	349	+	121	Sp
126_JB4_EBC069_J_S_08_I_3511800_3512149	JB4_EBC069	I	2012001	10	349	+	121	Sp
253_JB758_J_2_I_1956806_1957155	JB758	I	2012002	10	349	-	121	Sk
190_JB760_J_37_I_463394_463787	JB760	I	2011968	0	393	-	121	Sp
60_JB760_EBC074_J_S_11_I_1807133_1807526	JB760_EBC074	I	2011967	0	393	-	121	Sp
130_JB854_J_3_I_629826_630175	JB854	I	2012002	10	349	+	121	Sp
96_JB869_J_2_I_2030137_2030530	JB869	I	2011968	0	393	-	121	Sp
164_JB872_EBC094_J_S_08_I_2031780_2032173	JB872_EBC094	I	2011968	0	393	-	121	Sp
36_JB873_J_11_I_279936_280285	JB873	I	2012002	10	349	+	121	Sp
82_JB873_EBC095_J_S_08_I_1800932_1801281	JB873_EBC095	I	2012001	10	349	+	121	Sp
51_JB879_J_30_I_67876_68269	JB879	I	2011968	0	393	-	121	Sp
164_JB918_EBC111_J_S_599_II_I_2027975_2028368	JB918_EBC111	I	2011968	0	393	-	121	Sp
128_JB929_J_2_I_1033837_1034480	JB929	I	2012004	10	643	-	121	Sp
29_JB934_EBC115_J_S_00_I_1918783_1919176	JB934_EBC115	I	2011968	0	393	-	121	Sp
77_JB938_J_57_I_458600_458949	JB938	I	2012002	10	349	+	121	Sp
Pomberef_203_plus_len334	Pomberef	I	2012002	10	334	+	121	Sp
113_JB943_J_11_I_1801139_1801487	JB943	I	2030490	10	348	+	122	Sk
161_DY34373_L_1_I_1726318_1726748	DY34373	I	2063885	0	430	+	123	Sk
143_DY39827_L_1_I_1747962_1748392	DY39827	I	2063885	0	430	+	123	Sk
30_JB1197_EBC135_J_S_68_I_2292645_2295704	JB1197_EBC135	I	2063862	10	3059	+	123	Sk
24_JB872_EBC094_J_S_08_I_2125867_2130807	JB872_EBC094	I	2106041	10	4940	-	124	Sp
1_JB1180_J_10_I_124647_129559	JB1180	I	2154511	10	4912	+	125	Sp
212_JB1197_EBC135_J_S_68_I_2386470_2387395	JB1197_EBC135	I	2154529	0	925	-	125	Sk
33_JB758_J_2_I_2111945_2116875	JB758	I	2167012	10	4930	+	126	Sk
15_JB943_J_11_I_1657728_1659629	JB943	I	2167047	4930	1901	+	126	Sp
16_JB943_J_11_I_1659638_1664553	JB943	I	2167053	0	4915	+	126	Sp
160_DY34373_L_1_I_1615619_1615956	DY34373	I	2173897	0	337	+	128	Sk
142_DY39827_L_1_I_1637602_1637939	DY39827	I	2173897	0	337	+	128	Sk
76_JB1110_EBC121_J_S_09_I_1005287_1005624	JB1110_EBC121	I	2173898	0	337	+	128	Sp
106_JB1174_EBC132_J_S_00_I_3488763_3489100	JB1174_EBC132	I	2173897	0	337	+	128	Sp
72_JB1180_J_10_I_104936_105273	JB1180	I	2173897	0	337	+	128	Sp
213_JB1197_EBC135_J_S_68_I_2406759_2407096	JB1197_EBC135	I	2173888	10	337	+	128	Sk
91_JB1205_EBC137_J_S_15_I_III_1628917_1629254	JB1205_EBC137	I	2173897	0	337	+	128	Sp
158_JB1206_J_5_I_III_1897249_1897586	JB1206	I	2173888	10	337	+	128	Sp
161_JB1206_EBC138_J_S_16_I_III_1875425_1875762	JB1206_EBC138	I	2173888	10	337	+	128	Sp
125_JB22_J_24_I_887814_888151	JB22	I	2173888	10	337	+	128	Sp
55_JB22_EBC2_J_S_07_I_3418692_3419029	JB22_EBC2	I	2173897	0	337	+	128	Sp
22_JB4_J_1_I_1634156_1634493	JB4	I	2173897	0	337	+	128	Sp
125_JB4_EBC069_J_S_08_I_3349932_3350269	JB4_EBC069	I	2173897	0	337	+	128	Sp
254_JB758_J_2_I_2123761_2124097	JB758	I	2173889	10	336	+	128	Sk
191_JB760_J_37_I_625324_625661	JB760	I	2173888	10	337	+	128	Sp
59_JB760_EBC074_J_S_11_I_1645255_1645592	JB760_EBC074	I	2173897	0	337	+	128	Sp
186_JB837_J_6_I_2165755_2166092	JB837	I	2173888	10	337	+	128	Sk
186_JB840_J_4_I_2123083_2123420	JB840	I	2173888	10	337	+	128	Sp
93_JB842_EBC080_J_S_08_I_1446839_1447176	JB842_EBC080	I	2173897	0	337	+	128	Sk
95_JB853_EBC085_J_S_06_I_1662852_1663189	JB853_EBC085	I	2173897	0	337	+	128	Sk
131_JB854_J_3_I_791719_792056	JB854	I	2173888	10	337	+	128	Sp
68_JB858_EBC087_J_S_08_I_2033439_2033776	JB858_EBC087	I	2173888	10	337	+	128	Sk
135_JB864_J_69_I_II_2562069_2562406	JB864	I	2173897	0	337	+	128	Sk
97_JB869_J_2_I_2192047_2192384	JB869	I	2173888	10	337	+	128	Sp
165_JB872_EBC094_J_S_08_I_2198663_2199000	JB872_EBC094	I	2173898	0	337	+	128	Sp
37_JB873_J_11_I_441822_442159	JB873	I	2173888	10	337	+	128	Sp
81_JB873_EBC095_J_S_08_I_1639059_1639396	JB873_EBC095	I	2173897	0	337	+	128	Sp
179_JB874_J_1_I_2217104_2217441	JB874	I	2173888	10	337	+	128	Sk
52_JB879_J_30_I_229671_230008	JB879	I	2173888	10	337	+	128	Sp
94_JB900_EBC131_J_S_1607_I_3402786_3403123	JB900_EBC131	I	2173897	0	337	+	128	Sp
165_JB918_EBC111_J_S_599_II_I_2189915_2190252	JB918_EBC111	I	2173898	0	337	+	128	Sp
127_JB929_J_2_I_871951_872288	JB929	I	2173897	0	337	+	128	Sp
30_JB934_EBC115_J_S_00_I_2080716_2081053	JB934_EBC115	I	2173888	10	337	+	128	Sp
78_JB938_J_57_I_620483_620820	JB938	I	2173898	0	337	+	128	Sp
23_JB939_EBC119_J_S_00_I_2127681_2128018	JB939_EBC119	I	2173888	10	337	+	128	Sk
112_JB943_J_11_I_1650544_1650881	JB943	I	2173897	0	337	+	128	Sp
143_JB953_J_1_II_I_5283192_5283529	JB953	I	2173888	10	337	+	128	Sk
Pomberef_204_comp_len203	Pomberef	I	2173889	10	203	-	128	Sp
159_DY34373_L_1_I_1602583_1602931	DY34373	I	2186785	0	348	+	129	Sk
141_DY39827_L_1_I_1624567_1624915	DY39827	I	2186785	0	348	+	129	Sk
77_JB1110_EBC121_J_S_09_I_1018176_1018519	JB1110_EBC121	I	2186786	0	343	-	129	Sp
105_JB1174_EBC132_J_S_00_I_3475868_3476211	JB1174_EBC132	I	2186785	0	343	-	129	Sp
71_JB1180_J_10_I_92057_92400	JB1180	I	2186785	0	343	-	129	Sp
214_JB1197_EBC135_J_S_68_I_2419733_2420111	JB1197_EBC135	I	2186735	10	378	+	129	Sk
215_JB1197_EBC135_J_S_68_I_2420137_2420485	JB1197_EBC135	I	2186786	0	348	+	129	Sk
90_JB1205_EBC137_J_S_15_I_III_1616022_1616365	JB1205_EBC137	I	2186785	0	343	-	129	Sp
159_JB1206_J_5_I_III_1910137_1910480	JB1206	I	2186786	0	343	-	129	Sp
162_JB1206_EBC138_J_S_16_I_III_1888313_1888656	JB1206_EBC138	I	2186786	0	343	-	129	Sp
126_JB22_J_24_I_900700_901043	JB22	I	2186786	0	343	-	129	Sp
54_JB22_EBC2_J_S_07_I_3405798_3406141	JB22_EBC2	I	2186785	0	343	-	129	Sp
21_JB4_J_1_I_1621274_1621617	JB4	I	2186785	0	343	-	129	Sp
124_JB4_EBC069_J_S_08_I_3337051_3337394	JB4_EBC069	I	2186785	0	343	-	129	Sp
255_JB758_J_2_I_2136782_2137129	JB758	I	2186786	0	347	+	129	Sk
117_JB760_J_25_I_5816_6159	JB760	I	2186786	0	343	-	129	Sp
58_JB760_EBC074_J_S_11_I_1632373_1632716	JB760_EBC074	I	2186785	0	343	-	129	Sp
187_JB837_J_6_I_2178795_2179143	JB837	I	2186786	0	348	+	129	Sk
187_JB840_J_4_I_2135973_2136316	JB840	I	2186786	0	343	-	129	Sp
92_JB842_EBC080_J_S_08_I_1433801_1434150	JB842_EBC080	I	2186785	0	349	+	129	Sk
94_JB853_EBC085_J_S_06_I_1649809_1650158	JB853_EBC085	I	2186785	0	349	+	129	Sk
132_JB854_J_3_I_804608_804951	JB854	I	2186786	0	343	-	129	Sp
69_JB858_EBC087_J_S_08_I_2046459_2046808	JB858_EBC087	I	2186786	0	349	+	129	Sk
134_JB864_J_69_I_II_2549031_2549380	JB864	I	2186785	0	349	+	129	Sk
98_JB869_J_2_I_2204933_2205276	JB869	I	2186786	0	343	-	129	Sp
166_JB872_EBC094_J_S_08_I_2211552_2211895	JB872_EBC094	I	2186786	0	343	-	129	Sp
38_JB873_J_11_I_454711_455054	JB873	I	2186786	0	343	-	129	Sp
80_JB873_EBC095_J_S_08_I_1626166_1626509	JB873_EBC095	I	2186785	0	343	-	129	Sp
180_JB874_J_1_I_2230132_2230480	JB874	I	2186786	0	348	+	129	Sk
53_JB879_J_30_I_242547_242890	JB879	I	2186786	0	343	-	129	Sp
93_JB900_EBC131_J_S_1607_I_3389890_3390233	JB900_EBC131	I	2186785	0	343	-	129	Sp
166_JB918_EBC111_J_S_599_II_I_2202803_2203146	JB918_EBC111	I	2186786	0	343	-	129	Sp
126_JB929_J_2_I_859059_859402	JB929	I	2186785	0	343	-	129	Sp
31_JB934_EBC115_J_S_00_I_2093606_2093949	JB934_EBC115	I	2186786	0	343	-	129	Sp
79_JB938_J_57_I_633371_633714	JB938	I	2186786	0	343	-	129	Sp
24_JB939_EBC119_J_S_00_I_2140712_2141061	JB939_EBC119	I	2186786	0	349	+	129	Sk
111_JB943_J_11_I_1637652_1637995	JB943	I	2186785	0	343	-	129	Sp
144_JB953_J_1_II_I_5296215_5296563	JB953	I	2186786	0	348	+	129	Sk
Pomberef_205_plus_len210	Pomberef	I	2186793	130	210	+	129	Sp
93_JB853_EBC085_J_S_06_I_1628818_1633732	JB853_EBC085	I	2203187	10	4914	+	130	Sk
17_JB929_J_2_I_751053_755986	JB929	I	2290207	0	4933	+	132	Sp
11_JB853_EBC085_J_S_06_I_1528303_1533218	JB853_EBC085	I	2298714	0	4915	+	133	Sk
8_JB1110_EBC121_J_S_09_I_1157998_1162496	JB1110_EBC121	I	2326578	10	4498	-	134	Sp
9_JB1110_EBC121_J_S_09_I_1166646_1171561	JB1110_EBC121	I	2330723	10	4915	+	135	Sp
9_JB1174_EBC132_J_S_00_I_3327327_3332242	JB1174_EBC132	I	2330722	10	4915	+	135	Sp
256_JB758_J_2_I_2280949_2281366	JB758	I	2330673	0	417	-	135	Sk
8_JB900_EBC131_J_S_1607_I_3241348_3246263	JB900_EBC131	I	2330722	10	4915	+	135	Sp
32_JB918_EBC111_J_S_599_II_I_2346782_2351697	JB918_EBC111	I	2330723	10	4915	+	135	Sp
28_JB1180_J_25_I_48921_53835	JB1180	I	2401677	10	4914	-	136	Sp
158_DY34373_L_1_I_1373620_1373973	DY34373	I	2415505	0	353	-	137	Sk
140_DY39827_L_1_I_1395807_1396160	DY39827	I	2415505	0	353	-	137	Sk
78_JB1110_EBC121_J_S_09_I_1256558_1256908	JB1110_EBC121	I	2415506	0	350	-	137	Sp
104_JB1174_EBC132_J_S_00_I_3241978_3242328	JB1174_EBC132	I	2415505	0	350	-	137	Sk
130_JB1180_J_25_I_67656_68006	JB1180	I	2415506	0	350	-	137	Sp
216_JB1197_EBC135_J_S_68_I_2649084_2649434	JB1197_EBC135	I	2415506	0	350	-	137	Sp
89_JB1205_EBC137_J_S_15_I_III_1387066_1387419	JB1205_EBC137	I	2415505	0	353	-	137	Sk
160_JB1206_J_5_I_III_2139068_2139421	JB1206	I	2415506	0	353	-	137	Sk
163_JB1206_EBC138_J_S_16_I_III_2117264_2117617	JB1206_EBC138	I	2415506	0	353	-	137	Sk
127_JB22_J_24_I_1129401_1129751	JB22	I	2415506	0	350	-	137	Sp
53_JB22_EBC2_J_S_07_I_3177066_3177416	JB22_EBC2	I	2415505	0	350	-	137	Sp
20_JB4_J_1_I_1392527_1392877	JB4	I	2415505	0	350	-	137	Sp
123_JB4_EBC069_J_S_08_I_3108298_3108648	JB4_EBC069	I	2415505	0	350	-	137	Sp
257_JB758_J_2_I_2366167_2366520	JB758	I	2415506	0	353	-	137	Sk
118_JB760_J_25_I_237661_238011	JB760	I	2415506	0	350	-	137	Sp
57_JB760_EBC074_J_S_11_I_1403638_1403988	JB760_EBC074	I	2415505	0	350	-	137	Sp
188_JB837_J_6_I_2407701_2408054	JB837	I	2415506	0	353	-	137	Sk
188_JB840_J_4_I_2364651_2365004	JB840	I	2415506	0	353	-	137	Sk
91_JB842_EBC080_J_S_08_I_1205297_1205647	JB842_EBC080	I	2415505	0	350	-	137	Sp
92_JB853_EBC085_J_S_06_I_1411186_1411539	JB853_EBC085	I	2415505	0	353	-	137	Sk
133_JB854_J_3_I_1033378_1033728	JB854	I	2415506	0	350	-	137	Sp
70_JB858_EBC087_J_S_08_I_2275027_2275377	JB858_EBC087	I	2415506	0	350	-	137	Sp
133_JB864_J_69_I_II_2320269_2320622	JB864	I	2415505	0	353	-	137	Sk
99_JB869_J_2_I_2433629_2433979	JB869	I	2415506	0	350	-	137	Sp
167_JB872_EBC094_J_S_08_I_2440289_2440639	JB872_EBC094	I	2415506	0	350	-	137	Sp
100_JB873_J_25_I_198724_199074	JB873	I	2415505	0	350	-	137	Sp
79_JB873_EBC095_J_S_08_I_1397450_1397800	JB873_EBC095	I	2415505	0	350	-	137	Sp
181_JB874_J_1_I_2458889_2459242	JB874	I	2415506	0	353	-	137	Sk
120_JB879_J_57_I_40871_41221	JB879	I	2415505	0	350	-	137	Sp
92_JB900_EBC131_J_S_1607_I_3155999_3156349	JB900_EBC131	I	2415505	0	350	-	137	Sk
167_JB918_EBC111_J_S_599_II_I_2436910_2437260	JB918_EBC111	I	2415506	0	350	-	137	Sp
125_JB929_J_2_I_625389_625739	JB929	I	2415505	0	350	-	137	Sp
32_JB934_EBC115_J_S_00_I_2322432_2322785	JB934_EBC115	I	2415506	0	353	-	137	Sk
80_JB938_J_57_I_862087_862437	JB938	I	2415506	0	350	-	137	Sp
25_JB939_EBC119_J_S_00_I_2369451_2369804	JB939_EBC119	I	2415506	0	353	-	137	Sk
110_JB943_J_11_I_1408672_1409022	JB943	I	2415505	0	350	-	137	Sp
145_JB953_J_1_II_I_5525107_5525460	JB953	I	2415506	0	353	-	137	Sk
Pomberef_207_plus_len354	Pomberef	I	2415506	0	354	+	137	Sp
79_JB1110_EBC121_J_S_09_I_1278617_1278984	JB1110_EBC121	I	2437560	10	367	-	138	Sp
284_JB1180_J_8_I_765369_765736	JB1180	I	2437559	10	367	-	138	Sp
217_JB1197_EBC135_J_S_68_I_2671145_2671512	JB1197_EBC135	I	2437560	10	367	-	138	Sp
128_JB22_J_24_I_1151463_1151830	JB22	I	2437560	10	367	-	138	Sp
52_JB22_EBC2_J_S_07_I_3154986_3155353	JB22_EBC2	I	2437569	0	367	-	138	Sp
19_JB4_J_1_I_1370456_1370823	JB4	I	2437559	10	367	-	138	Sp
122_JB4_EBC069_J_S_08_I_3086225_3086592	JB4_EBC069	I	2437569	0	367	-	138	Sp
119_JB760_J_25_I_259727_260094	JB760	I	2437560	10	367	-	138	Sp
56_JB760_EBC074_J_S_11_I_1381555_1381922	JB760_EBC074	I	2437569	0	367	-	138	Sp
90_JB842_EBC080_J_S_08_I_1183221_1183588	JB842_EBC080	I	2437559	10	367	-	138	Sp
91_JB853_EBC085_J_S_06_I_1389108_1389475	JB853_EBC085	I	2437559	10	367	-	138	Sp
71_JB858_EBC087_J_S_08_I_2297086_2297453	JB858_EBC087	I	2437560	10	367	-	138	Sp
100_JB869_J_2_I_2455678_2456045	JB869	I	2437560	10	367	-	138	Sp
168_JB872_EBC094_J_S_08_I_2462349_2462716	JB872_EBC094	I	2437560	10	367	-	138	Sp
99_JB873_J_25_I_176655_177022	JB873	I	2437559	10	367	-	138	Sp
78_JB873_EBC095_J_S_08_I_1375381_1375748	JB873_EBC095	I	2437559	10	367	-	138	Sp
119_JB879_J_57_I_18790_19157	JB879	I	2437559	10	367	-	138	Sp
168_JB918_EBC111_J_S_599_II_I_2458970_2459337	JB918_EBC111	I	2437560	10	367	-	138	Sp
124_JB929_J_2_I_603321_603688	JB929	I	2437559	10	367	-	138	Sp
33_JB934_EBC115_J_S_00_I_2344496_2344863	JB934_EBC115	I	2437560	10	367	-	138	Sp
81_JB938_J_57_I_884151_884518	JB938	I	2437560	10	367	-	138	Sp
109_JB943_J_11_I_1386597_1386964	JB943	I	2437559	10	367	-	138	Sp
Pomberef_208_plus_len359	Pomberef	I	2437558	20	359	+	138	Sp
157_DY34373_L_1_I_1315224_1315590	DY34373	I	2474229	10	366	-	139	Sk
139_DY39827_L_1_I_1337416_1337782	DY39827	I	2474229	10	366	-	139	Sk
80_JB1110_EBC121_J_S_09_I_1315281_1315640	JB1110_EBC121	I	2474225	10	359	+	139	Sp
103_JB1174_EBC132_J_S_00_I_3183600_3183966	JB1174_EBC132	I	2474229	10	366	-	139	Sk
283_JB1180_J_8_I_728745_729104	JB1180	I	2474224	10	359	+	139	Sp
218_JB1197_EBC135_J_S_68_I_2707808_2708167	JB1197_EBC135	I	2474225	10	359	+	139	Sp
88_JB1205_EBC137_J_S_15_I_III_1328662_1329028	JB1205_EBC137	I	2474229	10	366	-	139	Sk
161_JB1206_J_5_I_III_2197448_2197814	JB1206	I	2474230	10	366	-	139	Sk
164_JB1206_EBC138_J_S_16_I_III_2175649_2176015	JB1206_EBC138	I	2474230	10	366	-	139	Sk
129_JB22_J_24_I_1188128_1188473	JB22	I	2474230	10	345	-	139	Sp
51_JB22_EBC2_J_S_07_I_3118338_3118683	JB22_EBC2	I	2474229	10	345	+	139	Sp
18_JB4_J_1_I_1333810_1334155	JB4	I	2474229	10	345	+	139	Sp
121_JB4_EBC069_J_S_08_I_3049579_3049924	JB4_EBC069	I	2474229	10	345	+	139	Sp
259_JB758_J_2_I_2425019_2425368	JB758	I	2474223	490	349	-	139	Sk
258_JB758_J_2_I_2424541_2424913	JB758	I	2474225	10	372	-	139	Sk
120_JB760_J_25_I_296395_296740	JB760	I	2474230	10	345	-	139	Sp
55_JB760_EBC074_J_S_11_I_1344907_1345252	JB760_EBC074	I	2474229	10	345	-	139	Sp
189_JB837_J_6_I_2466021_2466388	JB837	I	2474230	10	367	-	139	Sk
189_JB840_J_4_I_2423017_2423383	JB840	I	2474230	10	366	-	139	Sk
89_JB842_EBC080_J_S_08_I_1146565_1146924	JB842_EBC080	I	2474224	10	359	+	139	Sp
90_JB853_EBC085_J_S_06_I_1352452_1352811	JB853_EBC085	I	2474224	10	359	+	139	Sp
134_JB854_J_3_I_1091739_1092105	JB854	I	2474230	10	366	-	139	Sk
72_JB858_EBC087_J_S_08_I_2333748_2334107	JB858_EBC087	I	2474225	10	359	+	139	Sp
132_JB864_J_69_I_II_2261895_2262261	JB864	I	2474229	10	366	-	139	Sk
101_JB869_J_2_I_2492344_2492689	JB869	I	2474230	10	345	-	139	Sp
169_JB872_EBC094_J_S_08_I_2499013_2499372	JB872_EBC094	I	2474225	10	359	+	139	Sp
98_JB873_J_25_I_140003_140361	JB873	I	2474224	10	358	+	139	Sp
77_JB873_EBC095_J_S_08_I_1338728_1339086	JB873_EBC095	I	2474224	10	358	+	139	Sp
182_JB874_J_1_I_2517256_2517622	JB874	I	2474230	10	366	-	139	Sk
169_JB879_J_67_I_18023_18368	JB879	I	2474230	10	345	-	139	Sp
91_JB900_EBC131_J_S_1607_I_3097619_3097985	JB900_EBC131	I	2474229	10	366	-	139	Sk
169_JB918_EBC111_J_S_599_II_I_2495633_2495992	JB918_EBC111	I	2474225	10	359	+	139	Sp
123_JB929_J_2_I_566663_567022	JB929	I	2474224	10	359	+	139	Sp
34_JB934_EBC115_J_S_00_I_2381160_2381519	JB934_EBC115	I	2474225	10	359	+	139	Sp
82_JB938_J_57_I_920820_921165	JB938	I	2474230	10	345	+	139	Sp
26_JB939_EBC119_J_S_00_I_2427810_2428176	JB939_EBC119	I	2474230	10	366	-	139	Sk
108_JB943_J_11_I_1349943_1350302	JB943	I	2474224	10	359	+	139	Sp
146_JB953_J_1_II_I_5583475_5583841	JB953	I	2474230	10	366	-	139	Sk
Pomberef_209_comp_len350	Pomberef	I	2474225	10	350	-	139	Sp
8_JB842_EBC080_J_S_08_I_1138469_1143383	JB842_EBC080	I	2477756	10	4914	+	140	Sp
10_JB853_EBC085_J_S_06_I_1346049_1349270	JB853_EBC085	I	2477756	10	3221	+	140	Sp
13_JB943_J_11_I_1326376_1329021	JB943	I	2495495	10	2645	-	141	Sp
68_JB1180_J_8_I_671446_674221	JB1180	I	2528962	10	2775	-	142	Sp
67_JB1180_J_8_I_652732_657671	JB1180	I	2542737	10	4939	-	143	Sp
9_JB858_EBC087_J_S_08_I_2444739_2449654	JB858_EBC087	I	2585029	10	4915	-	144	Sp
260_JB758_J_2_I_2541199_2541929	JB758	I	2590117	0	730	-	145	Sk
190_JB840_J_4_I_2549951_2554726	JB840	I	2600809	10	4775	+	146	Sp
156_DY34373_L_1_I_1183686_1184040	DY34373	I	2605335	20	354	+	147	NA
138_DY39827_L_1_I_1205876_1206230	DY39827	I	2605335	20	354	+	147	NA
81_JB1110_EBC121_J_S_09_I_1446595_1446949	JB1110_EBC121	I	2605336	20	354	+	147	Sp
102_JB1174_EBC132_J_S_00_I_3052133_3052487	JB1174_EBC132	I	2605335	20	354	+	147	Sp
282_JB1180_J_8_I_589772_590126	JB1180	I	2605335	20	354	+	147	Sp
219_JB1197_EBC135_J_S_68_I_2839115_2839469	JB1197_EBC135	I	2605336	20	354	+	147	Sp
87_JB1205_EBC137_J_S_15_I_III_1197118_1197472	JB1205_EBC137	I	2605335	20	354	+	147	NA
162_JB1206_J_5_I_III_2328985_2329339	JB1206	I	2605336	20	354	+	147	NA
165_JB1206_EBC138_J_S_16_I_III_2307204_2307558	JB1206_EBC138	I	2605336	20	354	+	147	NA
130_JB22_J_24_I_1319238_1319592	JB22	I	2605336	20	354	+	147	Sp
50_JB22_EBC2_J_S_07_I_2987205_2987559	JB22_EBC2	I	2605335	20	354	+	147	Sp
17_JB4_J_1_I_1202669_1203023	JB4	I	2605335	20	354	+	147	Sp
120_JB4_EBC069_J_S_08_I_2918433_2918787	JB4_EBC069	I	2605335	20	354	+	147	Sp
261_JB758_J_2_I_2557162_2557516	JB758	I	2605336	20	354	+	147	NA
121_JB760_J_25_I_427506_427860	JB760	I	2605336	20	354	+	147	Sp
54_JB760_EBC074_J_S_11_I_1213778_1214132	JB760_EBC074	I	2605335	20	354	+	147	Sp
190_JB837_J_6_I_2597497_2597851	JB837	I	2605336	20	354	+	147	NA
191_JB840_J_4_I_2559265_2559619	JB840	I	2605336	20	354	+	147	Sp
88_JB842_EBC080_J_S_08_I_1010338_1010692	JB842_EBC080	I	2605335	20	354	+	147	Sp
89_JB853_EBC085_J_S_06_I_1217920_1218274	JB853_EBC085	I	2605335	20	354	+	147	Sp
135_JB854_J_3_I_1223194_1223548	JB854	I	2605336	20	354	+	147	NA
73_JB858_EBC087_J_S_08_I_2469983_2470337	JB858_EBC087	I	2605336	20	354	+	147	Sp
131_JB864_J_69_I_II_2130425_2130779	JB864	I	2605335	20	354	+	147	NA
102_JB869_J_2_I_2623403_2623757	JB869	I	2605336	20	354	+	147	Sp
170_JB872_EBC094_J_S_08_I_2630321_2630675	JB872_EBC094	I	2605336	20	354	+	147	Sp
97_JB873_J_25_I_8850_9204	JB873	I	2605335	20	354	+	147	Sp
76_JB873_EBC095_J_S_08_I_1207567_1207921	JB873_EBC095	I	2605335	20	354	+	147	Sp
183_JB874_J_1_I_2648526_2648880	JB874	I	2605336	20	354	+	147	NA
170_JB879_J_67_I_149330_149684	JB879	I	2605336	20	354	+	147	Sp
90_JB900_EBC131_J_S_1607_I_2966152_2966506	JB900_EBC131	I	2605335	20	354	+	147	Sp
170_JB918_EBC111_J_S_599_II_I_2626947_2627301	JB918_EBC111	I	2605336	20	354	+	147	Sp
122_JB929_J_2_I_435367_435721	JB929	I	2605335	20	354	+	147	Sp
35_JB934_EBC115_J_S_00_I_2512494_2512848	JB934_EBC115	I	2605336	20	354	+	147	Sp
83_JB938_J_57_I_1051940_1052294	JB938	I	2605336	20	354	+	147	Sp
27_JB939_EBC119_J_S_00_I_2559275_2559629	JB939_EBC119	I	2605336	20	354	+	147	NA
107_JB943_J_11_I_1215986_1216340	JB943	I	2605335	20	354	+	147	Sp
147_JB953_J_1_II_I_5715007_5715361	JB953	I	2605336	20	354	+	147	NA
Pomberef_210_plus_len347	Pomberef	I	2605336	20	347	+	147	Sp
121_JB929_J_2_I_404994_412707	JB929	I	2628372	0	7713	-	148	Sp
12_JB943_J_11_I_1155192_1160132	JB943	I	2661559	10	4940	+	149	Sk
201_JB943_J_28_6380_6417	JB943	I	2667501	2330	37	+	150	NA
25_JB874_J_1_I_2716945_2721860	JB874	I	2673722	10	4915	+	151	Sk
JB758_49_plus_len358	JB758	I	2683872	4930	358	+	152	Sk
8_JB758_J_10_I_682466_687381	JB758	I	2683874	10	4915	+	152	Sk
9_DY34373_L_10_I_1045768_1046497	DY34373	I	2693875	0	729	-	153	Sk
75_DY39827_L_15_I_634022_634751	DY39827	I	2693876	0	729	-	153	Sk
107_JB1110_EBC121_J_S_11_I_1072340_1072684	JB1110_EBC121	I	2693885	0	344	+	153	Sp
95_JB1180_J_16_I_369407_369751	JB1180	I	2693886	0	344	+	153	Sp
69_JB1205_EBC137_J_S_13_I_645536_646265	JB1205_EBC137	I	2693876	0	729	-	153	Sk
180_JB1206_J_5_I_III_4596803_4597532	JB1206	I	2693875	0	729	-	153	Sk
183_JB1206_EBC138_J_S_18_I_1080764_1081493	JB1206_EBC138	I	2693875	0	729	-	153	Sk
131_JB22_J_24_I_1407757_1408101	JB22	I	2693886	0	344	+	153	Sp
49_JB22_EBC2_J_S_07_I_2898685_2899029	JB22_EBC2	I	2693885	0	344	+	153	Sp
172_JB4_J_6_I_1083225_1083569	JB4	I	2693885	0	344	+	153	Sp
97_JB4_EBC069_J_S_08_I_644986_645330	JB4_EBC069	I	2693886	0	344	+	153	Sp
58_JB758_J_10_I_697811_698180	JB758	I	2693840	0	369	-	153	Sk
59_JB758_J_10_I_698209_698553	JB758	I	2693858	380	344	+	153	Sk
70_JB760_J_19_I_654010_654354	JB760	I	2693886	0	344	+	153	Sp
23_JB760_EBC074_J_S_02_I_1068925_1069269	JB760_EBC074	I	2693885	0	344	+	153	Sp
41_JB837_J_0_I_701388_701747	JB837	I	2693886	0	359	+	153	Sp
18_JB854_J_0_I_1075437_1075781	JB854	I	2693885	0	344	+	153	Sp
127_JB869_J_2_I_4903657_4904001	JB869	I	2693885	0	344	+	153	Sp
208_JB873_J_58_I_241884_242228	JB873	I	2693886	0	344	+	153	Sp
49_JB873_EBC095_J_S_06_I_752816_753160	JB873_EBC095	I	2693886	0	344	+	153	Sp
116_JB874_J_13_I_540371_540715	JB874	I	2693886	0	344	+	153	Sp
171_JB879_J_67_I_237852_238196	JB879	I	2693886	0	344	+	153	Sp
74_JB918_EBC111_J_S_14_II_I_1021696_1022040	JB918_EBC111	I	2693885	0	344	+	153	Sp
215_JB929_J_36_II_I_966939_967283	JB929	I	2693886	0	344	+	153	Sp
36_JB934_EBC115_J_S_00_I_2601010_2601354	JB934_EBC115	I	2693886	0	344	+	153	Sp
53_JB938_J_53_I_1317157_1317501	JB938	I	2693885	0	344	+	153	Sp
276_JB943_J_9_I_1075454_1075798	JB943	I	2693885	0	344	+	153	Sp
Pomberef_211_comp_len342	Pomberef	I	2693883	0	342	-	153	Sp
12_JB874_J_13_I_550361_555301	JB874	I	2703866	10	4940	+	154	NA
15_JB1110_EBC121_J_S_11_I_1041316_1046231	JB1110_EBC121	I	2720305	0	4915	+	155	Sp
4_JB760_J_24_I_58139_60635	JB760	I	2787032	10	2496	-	156	Sp
4_JB760_EBC074_J_S_02_I_973627_976123	JB760_EBC074	I	2787031	10	2496	-	156	Sp
13_JB874_J_13_I_651882_656796	JB874	I	2800406	10	4914	-	157	Sp
22_JB1174_EBC132_J_S_00_I_867257_869360	JB1174_EBC132	I	2820904	10	2103	+	158	Sp
19_JB900_EBC131_J_S_1607_I_781263_783366	JB900_EBC131	I	2820904	10	2103	+	158	Sp
9_JB758_J_10_I_846405_851345	JB758	I	2841935	10	4940	-	159	Sk
8_DY34373_L_10_I_895781_896150	DY34373	I	2843744	10	369	-	160	Sk
76_DY39827_L_15_I_784378_784752	DY39827	I	2843740	10	374	-	160	Sk
106_JB1110_EBC121_J_S_11_I_917476_917845	JB1110_EBC121	I	2843744	10	369	+	160	Sp
83_JB1174_EBC132_J_S_00_I_892206_892575	JB1174_EBC132	I	2843735	20	369	+	160	Sp
96_JB1180_J_17_I_47421_47790	JB1180	I	2843745	10	369	+	160	Sp
118_JB1197_EBC135_J_S_151_I_576043_576412	JB1197_EBC135	I	2843735	20	369	+	160	Sp
70_JB1205_EBC137_J_S_13_I_795887_796256	JB1205_EBC137	I	2843735	20	369	-	160	Sk
179_JB1206_J_5_I_III_4446819_4447188	JB1206	I	2843744	10	369	-	160	Sk
182_JB1206_EBC138_J_S_18_I_930772_931141	JB1206_EBC138	I	2843744	10	369	-	160	Sk
132_JB22_J_24_I_1557611_1557980	JB22	I	2843735	20	369	+	160	Sp
48_JB22_EBC2_J_S_07_I_2748791_2749160	JB22_EBC2	I	2843744	10	369	+	160	Sp
171_JB4_J_6_I_933302_933671	JB4	I	2843744	10	369	+	160	Sp
98_JB4_EBC069_J_S_08_I_794884_795253	JB4_EBC069	I	2843735	20	369	+	160	Sp
60_JB758_J_10_I_853153_853527	JB758	I	2843740	10	374	-	160	Sk
114_JB760_J_24_I_117354_117723	JB760	I	2843735	20	369	+	160	Sp
22_JB760_EBC074_J_S_02_I_916538_916907	JB760_EBC074	I	2843744	10	369	+	160	Sp
42_JB837_J_0_I_851404_851777	JB837	I	2843740	10	373	-	160	Sk
106_JB840_J_18_I_788095_788464	JB840	I	2843735	20	369	+	160	Sp
67_JB842_EBC080_J_S_04_I_II_847697_848066	JB842_EBC080	I	2843735	20	369	+	160	Sp
36_JB853_EBC085_J_S_01_I_769313_769687	JB853_EBC085	I	2843740	10	374	-	160	Sk
17_JB854_J_0_I_925556_925925	JB854	I	2843744	10	369	+	160	Sp
97_JB858_EBC087_J_S_12_I_367315_367684	JB858_EBC087	I	2843744	10	369	+	160	Sp
7_JB864_J_25_I_643341_643710	JB864	I	2843745	10	369	+	160	Sp
126_JB869_J_2_I_4753773_4754142	JB869	I	2843744	10	369	+	160	Sp
66_JB872_EBC094_J_S_03_I_13194_13563	JB872_EBC094	I	2843744	10	369	+	160	Sp
157_JB873_J_41_I_196966_197335	JB873	I	2843744	10	369	+	160	Sp
50_JB873_EBC095_J_S_06_I_902673_903042	JB873_EBC095	I	2843745	10	369	+	160	Sp
117_JB874_J_13_I_700141_700510	JB874	I	2843735	20	369	+	160	Sp
172_JB879_J_67_I_387717_388086	JB879	I	2843745	10	369	+	160	Sp
71_JB900_EBC131_J_S_1607_I_806212_806581	JB900_EBC131	I	2843735	20	369	+	160	Sp
73_JB918_EBC111_J_S_14_II_I_871771_872140	JB918_EBC111	I	2843744	10	369	+	160	Sp
216_JB929_J_36_II_I_1116829_1117198	JB929	I	2843735	20	369	+	160	Sp
37_JB934_EBC115_J_S_00_I_2750880_2751249	JB934_EBC115	I	2843735	20	369	+	160	Sp
52_JB938_J_53_I_1167268_1167637	JB938	I	2843744	10	369	+	160	Sp
50_JB939_EBC119_J_S_01_I_815044_815418	JB939_EBC119	I	2843740	10	374	-	160	Sk
275_JB943_J_9_I_925574_925943	JB943	I	2843744	10	369	+	160	Sp
192_JB953_J_8_I_526894_527263	JB953	I	2843735	20	369	-	160	Sk
105_JB1110_EBC121_J_S_11_I_907195_907543	JB1110_EBC121	I	2854026	30	348	-	161	Sp
84_JB1174_EBC132_J_S_00_I_902508_902856	JB1174_EBC132	I	2854027	30	348	-	161	Sp
97_JB1180_J_17_I_57719_58067	JB1180	I	2854027	30	348	-	161	Sp
119_JB1197_EBC135_J_S_151_I_586346_586694	JB1197_EBC135	I	2854027	30	348	-	161	Sp
133_JB22_J_24_I_1567912_1568260	JB22	I	2854027	30	348	-	161	Sp
47_JB22_EBC2_J_S_07_I_2738510_2738858	JB22_EBC2	I	2854026	30	348	-	161	Sp
170_JB4_J_6_I_923021_923369	JB4	I	2854036	20	348	-	161	Sp
99_JB4_EBC069_J_S_08_I_805186_805534	JB4_EBC069	I	2854027	30	348	-	161	Sp
115_JB760_J_24_I_127657_128005	JB760	I	2854027	30	348	-	161	Sp
21_JB760_EBC074_J_S_02_I_906256_906604	JB760_EBC074	I	2854036	20	348	-	161	Sp
107_JB840_J_18_I_798398_798746	JB840	I	2854027	30	348	-	161	Sp
68_JB842_EBC080_J_S_04_I_II_857999_858347	JB842_EBC080	I	2854027	30	348	-	161	Sp
16_JB854_J_0_I_915221_915569	JB854	I	2854036	20	348	-	161	Sp
96_JB858_EBC087_J_S_12_I_357034_357382	JB858_EBC087	I	2854026	30	348	-	161	Sp
8_JB864_J_25_I_653645_653993	JB864	I	2854027	30	348	-	161	Sp
125_JB869_J_2_I_4743492_4743840	JB869	I	2854026	30	348	-	161	Sp
65_JB872_EBC094_J_S_03_I_2913_3261	JB872_EBC094	I	2854026	30	348	-	161	Sp
156_JB873_J_41_I_186681_187029	JB873	I	2854026	30	348	-	161	Sp
51_JB873_EBC095_J_S_06_I_912979_913327	JB873_EBC095	I	2854027	30	348	-	161	Sp
118_JB874_J_13_I_710443_710791	JB874	I	2854027	30	348	-	161	Sp
173_JB879_J_67_I_398019_398367	JB879	I	2854027	30	348	-	161	Sp
72_JB900_EBC131_J_S_1607_I_816514_816862	JB900_EBC131	I	2854027	30	348	-	161	Sp
72_JB918_EBC111_J_S_14_II_I_861490_861838	JB918_EBC111	I	2854026	30	348	-	161	Sp
217_JB929_J_36_II_I_1127131_1127479	JB929	I	2854027	30	348	-	161	Sp
38_JB934_EBC115_J_S_00_I_2761183_2761531	JB934_EBC115	I	2854027	30	348	-	161	Sp
51_JB938_J_53_I_1156987_1157335	JB938	I	2854026	30	348	-	161	Sp
274_JB943_J_9_I_915293_915641	JB943	I	2854036	20	348	-	161	Sp
Pomberef_213_plus_len348	Pomberef	I	2854027	30	348	+	161	Sp
61_JB758_J_10_I_929452_929801	JB758	I	2920378	10	349	+	162	Sk
85_JB1174_EBC132_J_S_00_I_974898_975642	JB1174_EBC132	I	2926432	10	744	+	163	Sk
73_JB900_EBC131_J_S_1607_I_888904_889648	JB900_EBC131	I	2926432	10	744	+	163	Sk
4_JB22_J_24_I_1640648_1645563	JB22	I	2926795	10	4915	+	164	Sp
46_JB22_EBC2_J_S_07_I_2665762_2666145	JB22_EBC2	I	2926769	0	383	-	164	Sp
3_JB760_J_24_I_200467_205382	JB760	I	2926795	10	4915	+	164	Sp
3_JB760_EBC074_J_S_02_I_828941_833855	JB760_EBC074	I	2926804	0	4914	+	164	Sp
70_JB943_J_9_I_840438_842916	JB943	I	2926738	10	2478	+	164	Sp
69_JB943_J_9_I_835436_840376	JB943	I	2926804	0	4940	-	164	Sp
7_Pomberef_I_2926805_2931720	Pomberef	I	2926795	10	4915	+	164	Sp
23_JB1174_EBC132_J_S_00_I_981724_986639	JB1174_EBC132	I	2937428	10	4915	+	165	Sk
21_JB900_EBC131_J_S_1607_I_895730_900645	JB900_EBC131	I	2937428	10	4915	+	165	Sk
7_JB918_EBC111_J_S_14_II_I_778403_783343	JB918_EBC111	I	2937437	0	4940	-	165	Sp
38_JB872_EBC094_J_S_16_I_77452_82367	JB872_EBC094	I	2939546	10	4915	-	166	Sp
16_JB873_J_41_I_101545_106460	JB873	I	2939545	10	4915	-	166	Sp
3_JB873_EBC095_J_S_06_I_993550_998465	JB873_EBC095	I	2939546	10	4915	-	166	Sp
30_JB929_J_36_II_I_1207688_1212603	JB929	I	2939546	10	4915	-	166	Sp
104_JB1110_EBC121_J_S_11_I_826271_826803	JB1110_EBC121	I	2939700	0	532	-	167	Sp
134_JB22_J_24_I_1653544_1656135	JB22	I	2939691	10	2591	-	167	Sp
45_JB22_EBC2_J_S_07_I_2655190_2657781	JB22_EBC2	I	2939700	0	2591	-	167	Sp
116_JB760_J_24_I_213363_215811	JB760	I	2939691	10	2448	-	167	Sp
20_JB760_EBC074_J_S_02_I_818512_820960	JB760_EBC074	I	2939700	0	2448	-	167	Sp
108_JB840_J_18_I_879145_881736	JB840	I	2939691	10	2591	-	167	Sp
15_JB854_J_0_I_832285_834876	JB854	I	2939700	0	2591	-	167	Sp
124_JB869_J_2_I_4660528_4663116	JB869	I	2939700	0	2588	-	167	Sp
15_JB879_J_14_I_16912_19503	JB879	I	2939691	10	2591	-	167	Sp
71_JB918_EBC111_J_S_14_II_I_773543_776134	JB918_EBC111	I	2939700	0	2591	-	167	Sp
39_JB934_EBC115_J_S_00_I_2841895_2844486	JB934_EBC115	I	2939691	10	2591	-	167	Sp
50_JB938_J_53_I_1074021_1076612	JB938	I	2939700	0	2591	-	167	Sp
273_JB943_J_9_I_824834_827425	JB943	I	2939700	0	2591	-	167	Sp
Pomberef_223_comp_len2061	Pomberef	I	2939691	540	2061	-	167	Sp
4_JB837_J_0_I_995600_1000515	JB837	I	2960523	10	4915	+	168	Sk
6_JB918_EBC111_J_S_14_II_I_742307_747238	JB918_EBC111	I	2967836	0	4931	+	169	Sp
14_JB1180_J_17_I_182620_187535	JB1180	I	2976188	10	4915	-	170	Sk
15_JB1180_J_17_I_187586_192501	JB1180	I	2976213	30	4915	+	170	Sk
69_JB842_EBC080_J_S_04_I_II_975969_985446	JB842_EBC080	I	2979761	10	9477	-	171	Sp
155_JB873_J_41_I_50866_55274	JB873	I	2989049	230	4408	-	172	Sp
1_JB873_EBC095_J_S_06_I_1044247_1049187	JB873_EBC095	I	2989263	10	4940	+	172	Sp
192_JB918_EBC111_J_S_599_II_I_4621920_4622285	JB918_EBC111	I	2993294	10	365	-	173	Sp
3_JB853_EBC085_J_S_01_I_935837_940752	JB853_EBC085	I	3018961	10	4915	+	174	Sk
1_JB837_J_0_I_1070757_1075697	JB837	I	3030723	10	4940	+	175	Sk
1_JB1174_EBC132_J_S_00_I_1077567_1082507	JB1174_EBC132	I	3031829	10	4940	-	176	Sp
22_JB900_EBC131_J_S_1607_I_991573_996513	JB900_EBC131	I	3031829	10	4940	-	176	Sp
62_JB758_J_10_I_1038431_1043359	JB758	I	3037528	0	4928	+	177	Sk
218_JB929_J_36_II_I_1307303_1312242	JB929	I	3037565	10	4939	+	177	Sp
103_JB1110_EBC121_J_S_11_I_725529_725886	JB1110_EBC121	I	3043429	0	357	+	178	Sp
86_JB1174_EBC132_J_S_00_I_1094103_1094460	JB1174_EBC132	I	3043420	10	357	+	178	Sp
135_JB22_J_24_I_1757255_1757612	JB22	I	3043420	10	357	+	178	Sp
44_JB22_EBC2_J_S_07_I_2553700_2554057	JB22_EBC2	I	3043429	0	357	+	178	Sp
169_JB4_J_6_I_741799_742156	JB4	I	3043429	0	357	+	178	Sp
100_JB4_EBC069_J_S_08_I_986402_986759	JB4_EBC069	I	3043420	10	357	+	178	Sp
135_JB760_J_33_I_32934_33291	JB760	I	3043420	10	357	+	178	Sp
19_JB760_EBC074_J_S_02_I_716993_717350	JB760_EBC074	I	3043429	0	357	+	178	Sp
43_JB837_J_0_I_1088499_1088856	JB837	I	3043420	10	357	+	178	Sp
109_JB840_J_18_I_982879_983236	JB840	I	3043420	10	357	+	178	Sp
70_JB842_EBC080_J_S_04_I_II_1049121_1049478	JB842_EBC080	I	3043420	10	357	+	178	Sp
37_JB853_EBC085_J_S_01_I_965321_965678	JB853_EBC085	I	3043420	10	357	+	178	Sp
14_JB854_J_0_I_730987_731344	JB854	I	3043429	0	357	+	178	Sp
95_JB858_EBC087_J_S_12_I_175919_176276	JB858_EBC087	I	3043429	0	357	+	178	Sp
123_JB869_J_2_I_4558279_4558636	JB869	I	3043429	0	357	+	178	Sp
222_JB872_EBC094_J_S_16_I_184646_185003	JB872_EBC094	I	3043420	10	357	+	178	Sp
74_JB873_J_20_I_2457_2814	JB873	I	3043420	10	357	+	178	Sp
52_JB873_EBC095_J_S_06_I_1103437_1103794	JB873_EBC095	I	3043420	10	357	+	178	Sp
119_JB874_J_13_I_890972_891329	JB874	I	3043420	10	357	+	178	Sp
16_JB879_J_14_I_120853_121210	JB879	I	3043420	10	357	+	178	Sp
74_JB900_EBC131_J_S_1607_I_1008109_1008466	JB900_EBC131	I	3043420	10	357	+	178	Sp
191_JB918_EBC111_J_S_599_II_I_4571435_4571792	JB918_EBC111	I	3043429	0	357	+	178	Sp
219_JB929_J_36_II_I_1318104_1318461	JB929	I	3043420	10	357	+	178	Sp
40_JB934_EBC115_J_S_00_I_2945406_2945763	JB934_EBC115	I	3043420	10	357	+	178	Sp
49_JB938_J_53_I_972317_972674	JB938	I	3043429	0	357	+	178	Sp
272_JB943_J_9_I_723122_723479	JB943	I	3043429	0	357	+	178	Sp
Pomberef_224_comp_len357	Pomberef	I	3043420	10	357	-	178	Sp
7_DY34373_L_10_I_674622_674962	DY34373	I	3072443	30	340	+	179	Sk
77_DY39827_L_15_I_1005502_1005860	DY39827	I	3072435	10	358	+	179	Sk
102_JB1110_EBC121_J_S_11_I_696506_696862	JB1110_EBC121	I	3072444	0	356	+	179	Sp
87_JB1174_EBC132_J_S_00_I_1123117_1123473	JB1174_EBC132	I	3072435	10	356	+	179	Sp
98_JB1180_J_17_I_288557_288913	JB1180	I	3072435	10	356	+	179	Sk
120_JB1197_EBC135_J_S_151_I_797918_798276	JB1197_EBC135	I	3072435	10	358	+	179	Sk
71_JB1205_EBC137_J_S_13_I_1017096_1017436	JB1205_EBC137	I	3072434	40	340	+	179	Sk
178_JB1206_J_5_I_III_4225670_4226010	JB1206	I	3072443	30	340	+	179	Sk
181_JB1206_EBC138_J_S_18_I_709594_709934	JB1206_EBC138	I	3072443	30	340	+	179	Sk
136_JB22_J_24_I_1786270_1786626	JB22	I	3072435	10	356	+	179	Sp
43_JB22_EBC2_J_S_07_I_2524686_2525042	JB22_EBC2	I	3072444	0	356	+	179	Sp
168_JB4_J_6_I_712785_713141	JB4	I	3072444	0	356	+	179	Sp
101_JB4_EBC069_J_S_08_I_1015417_1015773	JB4_EBC069	I	3072435	10	356	+	179	Sp
63_JB758_J_10_I_1077884_1078242	JB758	I	3072435	10	358	+	179	Sk
136_JB760_J_33_I_61947_62303	JB760	I	3072435	10	356	+	179	Sp
18_JB760_EBC074_J_S_02_I_687980_688336	JB760_EBC074	I	3072444	0	356	+	179	Sp
44_JB837_J_0_I_1117513_1117869	JB837	I	3072435	10	356	+	179	Sk
110_JB840_J_18_I_1011895_1012251	JB840	I	3072435	10	356	+	179	Sp
71_JB842_EBC080_J_S_04_I_II_1078134_1078490	JB842_EBC080	I	3072435	10	356	+	179	Sk
38_JB853_EBC085_J_S_01_I_994337_994693	JB853_EBC085	I	3072435	10	356	+	179	Sp
13_JB854_J_0_I_701978_702316	JB854	I	3072440	20	338	+	179	Sp
94_JB858_EBC087_J_S_12_I_146907_147263	JB858_EBC087	I	3072444	0	356	+	179	Sk
14_JB864_J_39_I_674053_674409	JB864	I	3072444	0	356	+	179	Sk
122_JB869_J_2_I_4529266_4529622	JB869	I	3072444	0	356	+	179	Sp
223_JB872_EBC094_J_S_16_I_213663_214019	JB872_EBC094	I	3072435	10	356	+	179	Sp
75_JB873_J_20_I_31476_31832	JB873	I	3072435	10	356	+	179	Sk
53_JB873_EBC095_J_S_06_I_1132456_1132812	JB873_EBC095	I	3072435	10	356	+	179	Sk
120_JB874_J_13_I_919985_920341	JB874	I	3072435	10	356	+	179	Sp
17_JB879_J_14_I_149868_150224	JB879	I	3072435	10	356	+	179	Sp
75_JB900_EBC131_J_S_1607_I_1037123_1037479	JB900_EBC131	I	3072435	10	356	+	179	Sp
190_JB918_EBC111_J_S_599_II_I_4542422_4542778	JB918_EBC111	I	3072444	0	356	+	179	Sp
220_JB929_J_36_II_I_1347117_1347473	JB929	I	3072435	10	356	+	179	Sp
41_JB934_EBC115_J_S_00_I_2974420_2974776	JB934_EBC115	I	3072435	10	356	+	179	Sp
48_JB938_J_53_I_943303_943659	JB938	I	3072444	0	356	+	179	Sp
51_JB939_EBC119_J_S_01_I_1035163_1035519	JB939_EBC119	I	3072435	10	356	+	179	Sk
271_JB943_J_9_I_694104_694460	JB943	I	3072444	0	356	+	179	Sp
193_JB953_J_8_I_748092_748432	JB953	I	3072434	40	340	+	179	Sk
Pomberef_225_plus_len344	Pomberef	I	3072441	20	344	+	179	Sp
64_JB758_J_10_I_1082266_1082907	JB758	I	3076813	10	641	+	180	Sk
6_DY34373_L_10_I_612491_612849	DY34373	I	3134546	10	358	+	181	Sk
78_DY39827_L_15_I_1067637_1067995	DY39827	I	3134547	10	358	+	181	Sk
101_JB1110_EBC121_J_S_11_I_634390_634748	JB1110_EBC121	I	3134546	10	358	+	181	Sp
88_JB1174_EBC132_J_S_00_I_1185253_1185611	JB1174_EBC132	I	3134547	10	358	+	181	Sk
99_JB1180_J_17_I_350649_351007	JB1180	I	3134547	10	358	+	181	Sk
121_JB1197_EBC135_J_S_151_I_860056_860415	JB1197_EBC135	I	3134547	10	359	+	181	Sk
72_JB1205_EBC137_J_S_13_I_1079212_1079570	JB1205_EBC137	I	3134547	10	358	+	181	Sk
177_JB1206_J_5_I_III_4163542_4163900	JB1206	I	3134546	10	358	+	181	Sk
180_JB1206_EBC138_J_S_18_I_647460_647818	JB1206_EBC138	I	3134546	10	358	+	181	Sk
137_JB22_J_24_I_1848378_1848736	JB22	I	3134547	10	358	+	181	Sp
42_JB22_EBC2_J_S_07_I_2462571_2462929	JB22_EBC2	I	3134546	10	358	+	181	Sp
167_JB4_J_6_I_650667_651025	JB4	I	3134546	10	358	+	181	Sk
102_JB4_EBC069_J_S_08_I_1077534_1077892	JB4_EBC069	I	3134547	10	358	+	181	Sk
65_JB758_J_10_I_1140666_1141025	JB758	I	3134547	10	359	+	181	Sk
137_JB760_J_33_I_124043_124202	JB760	I	3134519	220	159	+	181	Sp
17_JB760_EBC074_J_S_02_I_625854_626212	JB760_EBC074	I	3134546	10	358	+	181	Sp
45_JB837_J_0_I_1179626_1179985	JB837	I	3134547	10	359	+	181	Sk
111_JB840_J_18_I_1074017_1074375	JB840	I	3134547	10	358	+	181	Sp
72_JB842_EBC080_J_S_04_I_II_1140249_1140607	JB842_EBC080	I	3134547	10	358	+	181	Sk
39_JB853_EBC085_J_S_01_I_1056461_1056819	JB853_EBC085	I	3134547	10	358	+	181	Sk
12_JB854_J_0_I_639859_640217	JB854	I	3134546	10	358	+	181	Sp
93_JB858_EBC087_J_S_12_I_84790_85148	JB858_EBC087	I	3134546	10	358	+	181	Sk
13_JB864_J_39_I_611964_612322	JB864	I	3134546	10	358	+	181	Sk
121_JB869_J_2_I_4467152_4467510	JB869	I	3134546	10	358	+	181	Sp
224_JB872_EBC094_J_S_16_I_275788_276146	JB872_EBC094	I	3134547	10	358	+	181	Sk
76_JB873_J_20_I_93605_93963	JB873	I	3134547	10	358	+	181	Sp
54_JB873_EBC095_J_S_06_I_1194586_1194944	JB873_EBC095	I	3134547	10	358	+	181	Sp
121_JB874_J_13_I_982121_982479	JB874	I	3134547	10	358	+	181	Sk
18_JB879_J_14_I_211978_212336	JB879	I	3134547	10	358	+	181	Sp
76_JB900_EBC131_J_S_1607_I_1099260_1099618	JB900_EBC131	I	3134547	10	358	+	181	Sk
189_JB918_EBC111_J_S_599_II_I_4480296_4480654	JB918_EBC111	I	3134546	10	358	+	181	Sp
221_JB929_J_36_II_I_1409229_1409587	JB929	I	3134547	10	358	+	181	Sp
42_JB934_EBC115_J_S_00_I_3036541_3036899	JB934_EBC115	I	3134547	10	358	+	181	Sp
47_JB938_J_53_I_881188_881546	JB938	I	3134546	10	358	+	181	Sp
52_JB939_EBC119_J_S_01_I_1097277_1097635	JB939_EBC119	I	3134547	10	358	+	181	Sk
270_JB943_J_9_I_631978_632336	JB943	I	3134546	10	358	+	181	Sp
194_JB953_J_8_I_810225_810584	JB953	I	3134547	10	359	+	181	Sk
1_JB842_EBC080_J_S_04_I_II_1149500_1154415	JB842_EBC080	I	3143827	10	4915	+	182	Sk
18_JB858_EBC087_J_S_12_I_70982_75897	JB858_EBC087	I	3143826	10	4915	+	182	Sk
66_JB758_J_10_I_1156800_1157153	JB758	I	3150681	0	353	+	183	Sk
100_JB1110_EBC121_J_S_11_I_577975_578332	JB1110_EBC121	I	3190933	20	357	-	184	Sp
138_JB22_J_24_I_1904727_1905084	JB22	I	3190934	20	357	-	184	Sp
41_JB22_EBC2_J_S_07_I_2406169_2406526	JB22_EBC2	I	3190933	20	357	-	184	Sp
205_JB760_J_44_I_41387_41744	JB760	I	3190934	20	357	-	184	Sp
16_JB760_EBC074_J_S_02_I_569464_569821	JB760_EBC074	I	3190933	20	357	-	184	Sp
112_JB840_J_18_I_1130419_1130784	JB840	I	3190934	20	365	+	184	Sp
11_JB854_J_0_I_583450_583815	JB854	I	3190933	20	365	+	184	Sp
120_JB869_J_2_I_4410725_4411082	JB869	I	3190933	20	357	-	184	Sp
77_JB873_J_20_I_150006_150363	JB873	I	3190934	20	357	-	184	Sp
55_JB873_EBC095_J_S_06_I_1250986_1251343	JB873_EBC095	I	3190934	20	357	-	184	Sp
19_JB879_J_14_I_268419_268776	JB879	I	3190934	20	357	-	184	Sp
188_JB918_EBC111_J_S_599_II_I_4423907_4424264	JB918_EBC111	I	3190933	20	357	-	184	Sp
222_JB929_J_36_II_I_1465620_1465977	JB929	I	3190934	20	357	-	184	Sp
43_JB934_EBC115_J_S_00_I_3092942_3093299	JB934_EBC115	I	3190934	20	357	-	184	Sp
46_JB938_J_53_I_824794_825151	JB938	I	3190933	20	357	-	184	Sp
269_JB943_J_9_I_575551_575908	JB943	I	3190933	20	357	-	184	Sp
Pomberef_226_plus_len365	Pomberef	I	3190934	20	365	+	184	Sp
2_JB1174_EBC132_J_S_00_I_1262230_1266377	JB1174_EBC132	I	3211722	10	4147	-	185	Sk
40_JB853_EBC085_J_S_01_I_1141364_1141716	JB853_EBC085	I	3211742	10	352	-	185	Sk
1_JB900_EBC131_J_S_1607_I_1176234_1180381	JB900_EBC131	I	3211722	10	4147	-	185	Sk
3_JB1174_EBC132_J_S_00_I_1288191_1293131	JB1174_EBC132	I	3233523	10	4940	-	186	Sk
2_JB900_EBC131_J_S_1607_I_1202195_1207135	JB900_EBC131	I	3233523	10	4940	-	186	Sk
5_DY34373_L_10_I_501956_502295	DY34373	I	3245326	10	339	+	188	NA
79_DY39827_L_15_I_1178193_1178532	DY39827	I	3245327	10	339	+	188	NA
99_JB1110_EBC121_J_S_11_I_523606_523945	JB1110_EBC121	I	3245326	10	339	+	188	Sp
20_JB1110_EBC121_J_S_11_I_518643_523558	JB1110_EBC121	I	3245713	10	4915	+	188	Sp
89_JB1174_EBC132_J_S_00_I_1304940_1305279	JB1174_EBC132	I	3245317	20	339	+	188	NA
133_JB1180_J_3_I_55685_56024	JB1180	I	3245317	20	339	+	188	Sp
33_JB1180_J_3_I_56072_60987	JB1180	I	3245714	10	4915	+	188	Sp
122_JB1197_EBC135_J_S_151_I_970634_970973	JB1197_EBC135	I	3245317	20	339	+	188	NA
73_JB1205_EBC137_J_S_13_I_1189768_1190107	JB1205_EBC137	I	3245317	20	339	+	188	NA
176_JB1206_J_5_I_III_4053011_4053350	JB1206	I	3245326	10	339	+	188	NA
179_JB1206_EBC138_J_S_18_I_536923_537262	JB1206_EBC138	I	3245326	10	339	+	188	NA
139_JB22_J_24_I_1959107_1959446	JB22	I	3245317	20	339	+	188	Sp
40_JB22_EBC2_J_S_07_I_2351803_2352142	JB22_EBC2	I	3245326	10	339	+	188	Sp
166_JB4_J_6_I_540253_540592	JB4	I	3245326	10	339	+	188	Sp
103_JB4_EBC069_J_S_08_I_1187973_1188312	JB4_EBC069	I	3245327	10	339	+	188	Sp
67_JB758_J_10_I_1251591_1256542	JB758	I	3245317	20	4951	+	188	NA
206_JB760_J_44_I_95773_96112	JB760	I	3245317	20	339	+	188	Sp
15_JB760_EBC074_J_S_02_I_515096_515435	JB760_EBC074	I	3245326	10	339	+	188	Sp
46_JB837_J_0_I_1290162_1290501	JB837	I	3245317	20	339	+	188	NA
113_JB840_J_18_I_1184805_1185144	JB840	I	3245327	10	339	+	188	Sp
8_JB840_J_18_I_1185192_1190107	JB840	I	3245714	10	4915	+	188	Sp
73_JB842_EBC080_J_S_06_I_51990_52329	JB842_EBC080	I	3245317	20	339	+	188	NA
41_JB853_EBC085_J_S_01_I_1175308_1175647	JB853_EBC085	I	3245317	20	339	+	188	NA
10_JB854_J_0_I_529090_529429	JB854	I	3245326	10	339	+	188	Sp
1_JB854_J_0_I_524127_529042	JB854	I	3245713	10	4915	+	188	Sp
92_JB858_EBC087_J_S_10_I_517492_517831	JB858_EBC087	I	3245326	10	339	+	188	Sp
91_JB858_EBC087_J_S_10_I_517081_517448	JB858_EBC087	I	3245719	0	367	-	188	Sp
12_JB864_J_39_I_501462_501801	JB864	I	3245326	10	339	+	188	NA
119_JB869_J_2_I_4356361_4356700	JB869	I	3245326	10	339	+	188	Sp
225_JB872_EBC094_J_S_16_I_386353_386692	JB872_EBC094	I	3245317	20	339	+	188	Sp
226_JB872_EBC094_J_S_16_I_386741_395282	JB872_EBC094	I	3245715	10	8541	-	188	Sp
228_JB872_EBC094_J_S_18_I_1_8704	JB872_EBC094	I	3245728	10	8703	+	188	Sp
78_JB873_J_20_I_204393_204732	JB873	I	3245327	10	339	+	188	Sp
56_JB873_EBC095_J_S_06_I_1305372_1305711	JB873_EBC095	I	3245317	20	339	+	188	Sp
122_JB874_J_13_I_1092702_1093041	JB874	I	3245317	20	339	+	188	Sp
123_JB874_J_13_I_1093090_1102576	JB874	I	3245715	10	9486	-	188	Sp
20_JB879_J_14_I_322801_323140	JB879	I	3245317	20	339	+	188	Sp
77_JB900_EBC131_J_S_1607_I_1218944_1219283	JB900_EBC131	I	3245317	20	339	+	188	NA
187_JB918_EBC111_J_S_599_II_I_4369537_4369876	JB918_EBC111	I	3245326	10	339	+	188	Sp
223_JB929_J_36_II_I_1519998_1520110	JB929	I	3245317	10	112	-	188	Sp
226_JB929_J_36_II_I_1528649_1539157	JB929	I	3245318	8660	10508	-	188	Sp
224_JB929_J_36_II_I_1520423_1527130	JB929	I	3245322	430	6707	+	188	Sp
225_JB929_J_36_II_I_1527706_1528621	JB929	I	3245325	7710	915	-	188	Sp
44_JB934_EBC115_J_S_00_I_3147325_3147664	JB934_EBC115	I	3245317	20	339	+	188	Sp
45_JB938_J_53_I_770428_770767	JB938	I	3245326	10	339	+	188	Sp
53_JB939_EBC119_J_S_01_I_1207779_1208118	JB939_EBC119	I	3245317	20	339	+	188	NA
268_JB943_J_9_I_521185_521524	JB943	I	3245326	10	339	+	188	Sp
267_JB943_J_9_I_516213_521135	JB943	I	3245715	10	4922	-	188	Sp
195_JB953_J_8_I_920795_921134	JB953	I	3245317	20	339	+	188	NA
Pomberef_227_plus_len339	Pomberef	I	3245327	10	339	+	188	Sp
1_JB758_J_10_I_1297352_1302254	JB758	I	3286499	10	4902	+	189	Sk
2_JB758_J_10_I_1332838_1337732	JB758	I	3316701	10	4894	-	190	Sk
4_JB1174_EBC132_J_S_00_I_1379274_1384214	JB1174_EBC132	I	3318998	10	4940	+	191	Sk
30_JB1180_J_3_I_134440_139354	JB1180	I	3319042	10	4914	+	191	Sk
3_JB900_EBC131_J_S_1607_I_1293278_1298218	JB900_EBC131	I	3318998	10	4940	+	191	Sk
68_JB943_J_9_I_432819_438328	JB943	I	3319080	4400	5509	-	191	Sk
JB943_659_comp_len4395	JB943	I	3319084	0	4395	+	191	Sk
134_JB1180_J_3_I_141761_151283	JB1180	I	3321446	20	9522	-	192	Sk
140_JB22_J_24_I_2035220_2035577	JB22	I	3321456	10	357	-	192	Sp
39_JB22_EBC2_J_S_07_I_2275656_2276013	JB22_EBC2	I	3321455	10	357	-	192	Sp
165_JB4_J_6_I_464130_464487	JB4	I	3321455	10	357	-	192	Sp
104_JB4_EBC069_J_S_08_I_1264080_1264437	JB4_EBC069	I	3321446	20	357	-	192	Sp
68_JB758_J_10_I_1342468_1342825	JB758	I	3321441	10	357	+	192	Sk
207_JB760_J_44_I_172338_172695	JB760	I	3321446	20	357	-	192	Sp
14_JB760_EBC074_J_S_02_I_438510_438867	JB760_EBC074	I	3321455	10	357	-	192	Sp
118_JB869_J_2_I_4280232_4280589	JB869	I	3321455	10	357	-	192	Sp
79_JB873_J_20_I_280646_281003	JB873	I	3321446	20	357	-	192	Sp
57_JB873_EBC095_J_S_06_I_1381629_1381986	JB873_EBC095	I	3321456	10	357	-	192	Sp
21_JB879_J_14_I_399014_399371	JB879	I	3321446	20	357	-	192	Sp
36_JB918_EBC111_J_S_599_II_I_4288663_4293603	JB918_EBC111	I	3321455	10	4940	+	192	Sk
45_JB934_EBC115_J_S_00_I_3223705_3224062	JB934_EBC115	I	3321446	20	357	-	192	Sp
44_JB938_J_53_I_694291_694648	JB938	I	3321455	10	357	-	192	Sp
Pomberef_228_plus_len360	Pomberef	I	3321446	20	360	+	192	Sp
4_DY34373_L_10_I_415989_416091	DY34373	I	3331652	0	102	+	193	Sk
80_DY39827_L_15_I_1264399_1264501	DY39827	I	3331643	10	102	+	193	Sk
98_JB1110_EBC121_J_S_11_I_432591_432742	JB1110_EBC121	I	3331645	10	151	-	193	Sp
90_JB1174_EBC132_J_S_00_I_1396492_1396645	JB1174_EBC132	I	3331643	10	153	-	193	Sk
135_JB1180_J_3_I_161114_161267	JB1180	I	3331643	10	153	-	193	Sk
123_JB1197_EBC135_J_S_151_I_1056762_1056915	JB1197_EBC135	I	3331643	10	153	-	193	Sk
74_JB1205_EBC137_J_S_13_I_1275974_1276076	JB1205_EBC137	I	3331643	10	102	+	193	Sk
175_JB1206_J_5_I_III_3967047_3967149	JB1206	I	3331652	0	102	+	193	Sk
178_JB1206_EBC138_J_S_18_I_450954_451056	JB1206_EBC138	I	3331652	0	102	+	193	Sk
141_JB22_J_24_I_2045407_2045558	JB22	I	3331643	10	151	+	193	Sp
38_JB22_EBC2_J_S_07_I_2265675_2265826	JB22_EBC2	I	3331652	0	151	+	193	Sp
164_JB4_J_6_I_454154_454305	JB4	I	3331652	0	151	+	193	Sp
105_JB4_EBC069_J_S_08_I_1274262_1274413	JB4_EBC069	I	3331643	10	151	+	193	Sp
69_JB758_J_10_I_1352665_1352818	JB758	I	3331643	10	153	-	193	Sk
208_JB760_J_44_I_182520_182671	JB760	I	3331643	10	151	+	193	Sp
13_JB760_EBC074_J_S_02_I_428534_428685	JB760_EBC074	I	3331652	0	151	+	193	Sp
47_JB837_J_0_I_1376239_1376372	JB837	I	3331646	10	133	+	193	Sk
114_JB840_J_18_I_1276512_1276665	JB840	I	3331643	10	153	-	193	Sp
74_JB842_EBC080_J_S_06_I_138774_138927	JB842_EBC080	I	3331643	10	153	-	193	Sk
42_JB853_EBC085_J_S_01_I_1261844_1261997	JB853_EBC085	I	3331643	10	153	-	193	Sk
9_JB854_J_0_I_438027_438180	JB854	I	3331652	0	153	-	193	Sk
90_JB858_EBC087_J_S_10_I_431240_431393	JB858_EBC087	I	3331652	0	153	-	193	Sk
11_JB864_J_39_I_414593_414746	JB864	I	3331652	0	153	-	193	Sk
117_JB869_J_2_I_4270257_4270408	JB869	I	3331652	0	151	+	193	Sp
229_JB872_EBC094_J_S_18_I_94391_94544	JB872_EBC094	I	3331643	10	153	-	193	Sk
80_JB873_J_20_I_290828_290979	JB873	I	3331643	10	151	+	193	Sp
58_JB873_EBC095_J_S_06_I_1391811_1391962	JB873_EBC095	I	3331643	10	151	+	193	Sp
124_JB874_J_13_I_1188229_1188382	JB874	I	3331643	10	153	-	193	Sk
22_JB879_J_14_I_409201_409352	JB879	I	3331643	10	151	+	193	Sp
78_JB900_EBC131_J_S_1607_I_1310496_1310649	JB900_EBC131	I	3331643	10	153	-	193	Sk
186_JB918_EBC111_J_S_599_II_I_4278685_4278836	JB918_EBC111	I	3331645	10	151	-	193	Sp
77_JB929_J_12_I_8828_8979	JB929	I	3331643	10	151	+	193	Sp
46_JB934_EBC115_J_S_00_I_3233892_3234043	JB934_EBC115	I	3331643	10	151	+	193	Sp
43_JB938_J_53_I_684310_684461	JB938	I	3331652	0	151	+	193	Sp
54_JB939_EBC119_J_S_01_I_1294616_1294769	JB939_EBC119	I	3331643	10	153	-	193	Sk
266_JB943_J_9_I_420462_420615	JB943	I	3331652	0	153	-	193	Sk
196_JB953_J_8_I_1006753_1006855	JB953	I	3331643	10	102	+	193	Sk
6_JB22_J_24_I_2074902_2079816	JB22	I	3361138	10	4914	+	194	Sp
2_JB22_EBC2_J_S_07_I_2231417_2236331	JB22_EBC2	I	3361137	10	4914	+	194	Sp
70_JB758_J_10_I_1382149_1382523	JB758	I	3361139	10	374	-	194	Sk
8_Pomberef_I_3361148_3366062	Pomberef	I	3361138	10	4914	+	194	Sp
31_JB1180_J_3_I_235400_241589	JB1180	I	3410786	10	6189	+	195	NA
3_DY34373_L_10_I_314383_314724	DY34373	I	3438201	0	341	-	198	Sk
81_DY39827_L_15_I_1365771_1366112	DY39827	I	3438202	0	341	-	198	Sk
97_JB1110_EBC121_J_S_11_I_330764_331086	JB1110_EBC121	I	3438210	10	322	-	198	Sp
JB1174_EBC132_106_plus_len225	JB1174_EBC132	I	3438202	0	225	+	198	Sk
5_JB1174_EBC132_J_S_00_I_1498555_1500896	JB1174_EBC132	I	3438211	320	2341	-	198	Sk
136_JB1180_J_3_I_268975_269316	JB1180	I	3438202	0	341	-	198	Sk
124_JB1197_EBC135_J_S_151_I_1158109_1158450	JB1197_EBC135	I	3438202	0	341	-	198	Sk
75_JB1205_EBC137_J_S_13_I_1377343_1377684	JB1205_EBC137	I	3438202	0	341	-	198	Sk
174_JB1206_J_5_I_III_3865446_3865787	JB1206	I	3438201	0	341	-	198	Sk
177_JB1206_EBC138_J_S_18_I_349344_349685	JB1206_EBC138	I	3438201	0	341	-	198	Sk
142_JB22_J_24_I_2151963_2152285	JB22	I	3438211	10	322	-	198	Sp
37_JB22_EBC2_J_S_07_I_2158936_2159258	JB22_EBC2	I	3438210	10	322	-	198	Sp
163_JB4_J_6_I_352343_352665	JB4	I	3438210	10	322	-	198	Sp
106_JB4_EBC069_J_S_08_I_1375903_1376225	JB4_EBC069	I	3438211	10	322	-	198	Sp
71_JB758_J_10_I_1454757_1455098	JB758	I	3438202	0	341	-	198	Sk
209_JB760_J_44_I_284168_284490	JB760	I	3438211	10	322	-	198	Sp
12_JB760_EBC074_J_S_02_I_326722_327044	JB760_EBC074	I	3438210	10	322	-	198	Sp
48_JB837_J_0_I_1477974_1478298	JB837	I	3438209	10	324	-	198	Sk
115_JB840_J_18_I_1378168_1378492	JB840	I	3438209	10	324	-	198	Sk
75_JB842_EBC080_J_S_06_I_240517_240858	JB842_EBC080	I	3438202	0	341	-	198	Sk
43_JB853_EBC085_J_S_01_I_1363580_1363921	JB853_EBC085	I	3438202	0	341	-	198	Sk
8_JB854_J_0_I_336110_336451	JB854	I	3438201	0	341	-	198	Sk
89_JB858_EBC087_J_S_10_I_329313_329654	JB858_EBC087	I	3438201	0	341	-	198	Sk
10_JB864_J_39_I_312664_313005	JB864	I	3438201	0	341	-	198	Sk
116_JB869_J_2_I_4168455_4168777	JB869	I	3438210	10	322	-	198	Sp
230_JB872_EBC094_J_S_18_I_196129_196470	JB872_EBC094	I	3438202	0	341	-	198	Sk
70_JB873_J_1_I_273020_273342	JB873	I	3438210	10	322	-	198	Sp
59_JB873_EBC095_J_S_06_I_1493471_1493793	JB873_EBC095	I	3438211	10	322	-	198	Sp
125_JB874_J_13_I_1289963_1290304	JB874	I	3438202	0	341	-	198	Sk
167_JB879_J_66_I_21748_22070	JB879	I	3438211	10	322	-	198	Sp
JB900_EBC131_86_plus_len225	JB900_EBC131	I	3438202	0	225	+	198	Sk
4_JB900_EBC131_J_S_1607_I_1412561_1414902	JB900_EBC131	I	3438211	320	2341	-	198	Sk
185_JB918_EBC111_J_S_599_II_I_4176875_4177197	JB918_EBC111	I	3438210	10	322	-	198	Sp
78_JB929_J_12_I_110483_110805	JB929	I	3438211	10	322	-	198	Sp
47_JB934_EBC115_J_S_00_I_3335541_3335863	JB934_EBC115	I	3438211	10	322	-	198	Sp
42_JB938_J_53_I_582494_582816	JB938	I	3438210	10	322	-	198	Sp
55_JB939_EBC119_J_S_01_I_1396363_1396704	JB939_EBC119	I	3438202	0	341	-	198	Sk
67_JB943_J_9_I_314001_318941	JB943	I	3438190	10	4940	-	198	Sp
JB943_644_comp_len322	JB943	I	3438210	10	322	+	198	Sp
197_JB953_J_8_I_1108118_1108459	JB953	I	3438202	0	341	-	198	Sk
Pomberef_238_plus_len322	Pomberef	I	3438211	10	322	+	198	Sp
72_JB758_J_10_I_1455345_1455713	JB758	I	3438790	0	368	+	199	Sk
2_DY34373_L_10_I_274624_274813	DY34373	I	3478112	20	189	-	200	Sk
82_DY39827_L_15_I_1405652_1405841	DY39827	I	3478113	20	189	-	200	Sk
96_JB1110_EBC121_J_S_11_I_290982_291171	JB1110_EBC121	I	3478112	20	189	-	200	Sp
91_JB1174_EBC132_J_S_00_I_1540487_1540676	JB1174_EBC132	I	3478113	20	189	-	200	Sk
137_JB1180_J_3_I_308880_309069	JB1180	I	3478113	20	189	-	200	Sk
125_JB1197_EBC135_J_S_151_I_1198019_1198208	JB1197_EBC135	I	3478113	20	189	-	200	Sk
76_JB1205_EBC137_J_S_13_I_1417252_1417441	JB1205_EBC137	I	3478113	20	189	-	200	Sk
173_JB1206_J_5_I_III_3825687_3825876	JB1206	I	3478112	20	189	+	200	Sk
176_JB1206_EBC138_J_S_18_I_309586_309775	JB1206_EBC138	I	3478112	20	189	+	200	Sk
143_JB22_J_24_I_2191872_2192061	JB22	I	3478113	20	189	-	200	Sp
36_JB22_EBC2_J_S_07_I_2119158_2119347	JB22_EBC2	I	3478112	20	189	-	200	Sp
162_JB4_J_6_I_312557_312746	JB4	I	3478112	20	189	-	200	Sp
107_JB4_EBC069_J_S_08_I_1415823_1416012	JB4_EBC069	I	3478113	20	189	+	200	Sp
73_JB758_J_10_I_1494985_1495218	JB758	I	3478114	0	233	-	200	Sk
210_JB760_J_44_I_324080_324269	JB760	I	3478113	20	189	-	200	Sp
11_JB760_EBC074_J_S_02_I_286944_287133	JB760_EBC074	I	3478112	20	189	-	200	Sp
49_JB837_J_0_I_1517871_1518060	JB837	I	3478113	20	189	+	200	Sk
116_JB840_J_18_I_1418074_1418263	JB840	I	3478113	20	189	-	200	Sk
76_JB842_EBC080_J_S_06_I_280421_280610	JB842_EBC080	I	3478113	20	189	-	200	Sk
44_JB853_EBC085_J_S_01_I_1403494_1403683	JB853_EBC085	I	3478113	20	189	-	200	Sk
7_JB854_J_0_I_296347_296536	JB854	I	3478112	20	189	-	200	Sk
88_JB858_EBC087_J_S_10_I_289562_289751	JB858_EBC087	I	3478112	20	189	-	200	Sk
9_JB864_J_39_I_272907_273096	JB864	I	3478112	20	189	-	200	Sk
115_JB869_J_2_I_4128683_4128872	JB869	I	3478112	20	189	-	200	Sp
231_JB872_EBC094_J_S_18_I_236044_236233	JB872_EBC094	I	3478113	20	189	-	200	Sk
69_JB873_J_1_I_233253_233442	JB873	I	3478112	20	189	-	200	Sk
60_JB873_EBC095_J_S_06_I_1533371_1533560	JB873_EBC095	I	3478113	20	189	-	200	Sk
126_JB874_J_13_I_1329877_1330066	JB874	I	3478113	20	189	-	200	Sk
168_JB879_J_66_I_61657_61846	JB879	I	3478113	20	189	-	200	Sp
79_JB900_EBC131_J_S_1607_I_1454494_1454683	JB900_EBC131	I	3478113	20	189	-	200	Sk
184_JB918_EBC111_J_S_599_II_I_4137094_4137283	JB918_EBC111	I	3478112	20	189	-	200	Sp
79_JB929_J_12_I_150374_150563	JB929	I	3478113	20	189	-	200	Sp
48_JB934_EBC115_J_S_00_I_3375451_3375640	JB934_EBC115	I	3478113	20	189	-	200	Sp
41_JB938_J_53_I_542718_542907	JB938	I	3478112	20	189	-	200	Sp
56_JB939_EBC119_J_S_01_I_1436283_1436472	JB939_EBC119	I	3478113	20	189	-	200	Sk
265_JB943_J_9_I_273873_274062	JB943	I	3478112	20	189	-	200	Sp
126_JB1197_EBC135_J_S_151_I_1235350_1237014	JB1197_EBC135	I	3515458	10	1664	-	201	Sk
117_JB840_J_18_I_1484792_1484979	JB840	I	3544367	470	187	+	202	Sk
180_DY34373_L_7_7116_7219	DY34373	I	3548905	4270	103	+	203	Sk
37_JB758_J_0_7559_7615	JB758	I	3548909	3790	56	+	203	Sk
74_JB758_J_10_I_1596768_1597121	JB758	I	3579781	10	353	+	204	Sk
1_JB853_EBC085_J_S_01_I_1572085_1576173	JB853_EBC085	I	3646724	10	4088	-	206	Sk
3_JB758_J_10_I_1681546_1686366	JB758	I	3664210	10	4820	+	207	Sk
JB758_97_plus_len349	JB758	I	3664215	4850	349	+	207	Sk
68_JB873_J_1_I_46970_47342	JB873	I	3664197	0	372	-	207	Sk
61_JB873_EBC095_J_S_06_I_1719481_1719853	JB873_EBC095	I	3664198	0	372	-	207	Sk
127_JB874_J_13_I_1516014_1516386	JB874	I	3664198	0	372	-	207	Sk
67_JB873_J_1_I_46260_46629	JB873	I	3664541	0	369	+	208	Sk
62_JB873_EBC095_J_S_06_I_1720194_1720563	JB873_EBC095	I	3664542	0	369	+	208	Sk
128_JB874_J_13_I_1516727_1517096	JB874	I	3664542	0	369	+	208	Sk
43_JB760_J_11_I_1_1341	JB760	I	3683321	0	1340	-	209	Sp
211_JB760_J_44_I_533375_534560	JB760	I	3683324	0	1185	+	209	Sp
2_JB760_EBC074_J_S_02_I_76928_81842	JB760_EBC074	I	3683315	10	4914	-	209	Sp
JB872_EBC094_533_plus_len4950	JB872_EBC094	I	3683311	10	4950	+	209	Sk
32_JB1180_J_3_I_532705_537644	JB1180	I	3702053	10	4939	+	210	Sk
4_JB758_J_10_I_1751795_1756725	JB758	I	3729250	10	4930	-	211	Sp
7_JB1205_EBC137_J_S_22_II_2079985_2084925	JB1205_EBC137	I	3762737	260	4940	+	212	Sk
3_JB1206_J_1_II_4215749_4220689	JB1206	I	3779535	260	4940	+	213	NA
2_JB1206_EBC138_J_S_01_II_1572956_1577896	JB1206_EBC138	I	3779535	260	4940	+	213	NA
35_JB918_EBC111_J_S_599_II_I_3783123_3788063	JB918_EBC111	I	3826253	10	4940	-	214	Sk
12_JB1110_EBC121_J_S_09_I_2595479_2599111	JB1110_EBC121	I	3832296	10	3632	+	215	Sk
21_JB943_J_11_I_60593_65533	JB943	I	3850854	10	4940	-	216	Sk
34_JB918_EBC111_J_S_599_II_I_3723814_3728729	JB918_EBC111	I	3880172	10	4915	+	217	Sp
79_JB853_EBC085_J_S_06_I_133026_133384	JB853_EBC085	I	3887204	0	358	+	218	Sk
3_JB842_EBC080_J_S_06_I_701919_706834	JB842_EBC080	I	3891331	10	4915	-	219	Sk
14_JB858_EBC087_J_S_08_I_3575656_3580570	JB858_EBC087	I	3891330	10	4914	-	219	Sk
146_DY34373_L_1_I_134428_134797	DY34373	I	3924200	0	369	+	220	Sp
128_DY39827_L_1_I_156811_157180	DY39827	I	3924200	0	369	+	220	Sp
95_JB1110_EBC121_J_S_09_I_2503304_2503673	JB1110_EBC121	I	3924199	0	369	+	220	Sp
92_JB1174_EBC132_J_S_00_I_1994476_1994845	JB1174_EBC132	I	3924200	0	369	+	220	Sk
138_JB1180_J_3_I_768048_768417	JB1180	I	3924200	0	369	+	220	Sk
127_JB1197_EBC135_J_S_151_I_1646929_1647298	JB1197_EBC135	I	3924200	0	369	+	220	Sk
77_JB1205_EBC137_J_S_15_I_III_148054_148423	JB1205_EBC137	I	3924200	0	369	+	220	Sp
172_JB1206_J_5_I_III_3377948_3378317	JB1206	I	3924199	0	369	+	220	Sp
175_JB1206_EBC138_J_S_16_I_III_3356245_3356614	JB1206_EBC138	I	3924199	0	369	+	220	Sp
111_JB22_J_20_I_155042_155394	JB22	I	3924218	10	352	+	220	Sp
35_JB22_EBC2_J_S_07_I_1672916_1673268	JB22_EBC2	I	3924227	0	352	+	220	Sp
5_JB4_J_1_I_147071_147440	JB4	I	3924200	0	369	+	220	Sp
108_JB4_EBC069_J_S_08_I_1862986_1863355	JB4_EBC069	I	3924200	0	369	+	220	Sp
277_JB758_J_2_I_3622029_3622395	JB758	I	3924219	0	366	+	220	Sk
276_JB758_J_2_I_3621683_3622024	JB758	I	3924220	370	341	+	220	Sk
200_JB760_J_41_I_133798_134150	JB760	I	3924218	10	352	+	220	Sp
41_JB760_EBC074_J_S_11_I_146293_146645	JB760_EBC074	I	3924218	10	352	+	220	Sp
202_JB837_J_6_I_3649094_3649463	JB837	I	3924199	0	369	+	220	Sp
202_JB840_J_4_I_3609674_3610043	JB840	I	3924199	0	369	+	220	Sk
77_JB842_EBC080_J_S_06_I_739702_740071	JB842_EBC080	I	3924200	0	369	+	220	Sk
80_JB853_EBC085_J_S_06_I_170382_170751	JB853_EBC085	I	3924200	0	369	+	220	Sk
146_JB854_J_3_I_2274127_2274496	JB854	I	3924199	0	369	+	220	Sk
87_JB858_EBC087_J_S_08_I_3542419_3542788	JB858_EBC087	I	3924199	0	369	+	220	Sk
145_JB864_J_70_I_II_567602_567971	JB864	I	3924199	0	369	+	220	Sk
114_JB869_J_2_I_3674987_3675339	JB869	I	3924227	0	352	+	220	Sp
182_JB872_EBC094_J_S_10_I_139930_140299	JB872_EBC094	I	3924199	0	369	+	220	Sk
102_JB873_J_27_I_132416_132768	JB873	I	3924218	10	352	+	220	Sp
63_JB873_EBC095_J_S_08_I_145961_146313	JB873_EBC095	I	3924218	10	352	+	220	Sp
195_JB874_J_1_I_3722547_3722916	JB874	I	3924199	0	369	+	220	Sk
23_JB879_J_17_I_19269_19621	JB879	I	3924227	0	352	+	220	Sp
80_JB900_EBC131_J_S_1607_I_1908492_1908861	JB900_EBC131	I	3924200	0	369	+	220	Sk
183_JB918_EBC111_J_S_599_II_I_3679431_3679800	JB918_EBC111	I	3924199	0	369	+	220	Sp
133_JB929_J_30_I_154694_155063	JB929	I	3924200	0	369	+	220	Sk
110_JB934_EBC115_J_S_09.2_I_II_1834544_1834896	JB934_EBC115	I	3924227	0	352	+	220	Sp
40_JB938_J_53_I_96443_96795	JB938	I	3924227	0	352	+	220	Sp
37_JB939_EBC119_J_S_00_I_3608353_3608722	JB939_EBC119	I	3924199	0	369	+	220	Sk
96_JB943_J_11_I_138920_139289	JB943	I	3924200	0	369	+	220	Sk
159_JB953_J_1_II_I_6779187_6779555	JB953	I	3924199	0	368	+	220	Sk
Pomberef_241_plus_len352	Pomberef	I	3924218	10	352	+	220	Sp
4_JB842_EBC080_J_S_06_I_742845_747759	JB842_EBC080	I	3927344	10	4914	+	221	Sk
13_JB858_EBC087_J_S_08_I_3534731_3539645	JB858_EBC087	I	3927343	10	4914	+	221	Sk
94_JB1110_EBC121_J_S_09_I_2492606_2493082	JB1110_EBC121	I	3934793	0	476	-	222	Sp
139_JB1180_J_3_I_778635_779111	JB1180	I	3934794	0	476	-	222	Sk
128_JB1197_EBC135_J_S_151_I_1657520_1657996	JB1197_EBC135	I	3934794	0	476	-	222	Sk
6_JB4_J_1_I_157662_158138	JB4	I	3934794	0	476	-	222	Sp
109_JB4_EBC069_J_S_08_I_1873577_1874053	JB4_EBC069	I	3934794	0	476	-	222	Sp
194_JB874_J_1_I_3707039_3712287	JB874	I	3934821	10	5248	-	222	Sk
182_JB918_EBC111_J_S_599_II_I_3668733_3669209	JB918_EBC111	I	3934793	0	476	-	222	Sp
134_JB929_J_30_I_165285_165761	JB929	I	3934794	0	476	-	222	Sk
97_JB943_J_11_I_149511_149987	JB943	I	3934794	0	476	-	222	Sk
14_JB943_J_11_I_158122_162376	JB943	I	3942961	10	4254	-	223	Sk
147_DY34373_L_1_I_207548_207857	DY34373	I	3995596	0	309	-	224	Sk
129_DY39827_L_1_I_230578_230887	DY39827	I	3995596	0	309	-	224	Sk
11_JB1110_EBC121_J_S_09_I_2427653_2432593	JB1110_EBC121	I	3993650	10	4940	-	224	Sp
93_JB1110_EBC121_J_S_09_I_2425422_2425713	JB1110_EBC121	I	3995595	0	291	-	224	Sp
92_JB1110_EBC121_J_S_09_I_2425066_2425254	JB1110_EBC121	I	4000965	10	188	+	224	Sp
93_JB1174_EBC132_J_S_00_I_2067557_2067848	JB1174_EBC132	I	3995596	0	291	-	224	Sp
94_JB1174_EBC132_J_S_00_I_2068016_2068204	JB1174_EBC132	I	4000956	20	188	+	224	Sp
140_JB1180_J_3_I_841978_842269	JB1180	I	3995596	0	291	-	224	Sp
141_JB1180_J_3_I_842437_842625	JB1180	I	4000956	20	188	+	224	Sp
129_JB1197_EBC135_J_S_151_I_1717321_1722251	JB1197_EBC135	I	3993573	10	4930	+	224	Sp
130_JB1197_EBC135_J_S_151_I_1724269_1724560	JB1197_EBC135	I	3995596	0	291	-	224	Sp
131_JB1197_EBC135_J_S_151_I_1724728_1724916	JB1197_EBC135	I	4000956	20	188	+	224	Sp
78_JB1205_EBC137_J_S_15_I_III_221822_222131	JB1205_EBC137	I	3995596	0	309	-	224	Sk
171_JB1206_J_5_I_III_3304249_3304558	JB1206	I	3995595	0	309	-	224	Sk
174_JB1206_EBC138_J_S_16_I_III_3282535_3282844	JB1206_EBC138	I	3995595	0	309	-	224	Sk
112_JB22_J_20_I_227312_232348	JB22	I	3995477	530	5036	+	224	Sp
3_JB22_J_20_I_253447_258362	JB22	I	4000947	10	4915	-	224	Sp
34_JB22_EBC2_J_S_07_I_1601095_1601386	JB22_EBC2	I	3995595	0	291	-	224	Sp
33_JB22_EBC2_J_S_07_I_1600385_1600958	JB22_EBC2	I	3996023	0	573	+	224	Sp
7_JB4_J_1_I_222671_222962	JB4	I	3995596	0	291	-	224	NA
8_JB4_J_1_I_223130_223318	JB4	I	4000956	20	188	+	224	NA
110_JB4_EBC069_J_S_08_I_1938425_1938716	JB4_EBC069	I	3995596	0	291	-	224	NA
111_JB4_EBC069_J_S_08_I_1938884_1939072	JB4_EBC069	I	4000956	20	188	+	224	NA
275_JB758_J_2_I_3549051_3549356	JB758	I	3995595	0	305	-	224	Sk
274_JB758_J_2_I_3548705_3548893	JB758	I	4000965	10	188	+	224	Sk
192_JB760_J_38_I_50097_50388	JB760	I	3995596	0	291	-	224	Sp
193_JB760_J_38_I_50556_50744	JB760	I	4000956	20	188	+	224	Sp
42_JB760_EBC074_J_S_11_I_219236_219527	JB760_EBC074	I	3995596	0	291	-	224	Sp
43_JB760_EBC074_J_S_11_I_219695_219883	JB760_EBC074	I	4000956	20	188	+	224	Sp
201_JB837_J_6_I_3577527_3577835	JB837	I	3995595	0	308	+	224	Sk
200_JB837_J_6_I_3577186_3577374	JB837	I	4000965	10	188	+	224	Sk
201_JB840_J_4_I_3536191_3536482	JB840	I	3995595	0	291	-	224	Sp
200_JB840_J_4_I_3535835_3536023	JB840	I	4000965	10	188	+	224	Sp
5_JB842_EBC080_J_S_06_I_806565_811480	JB842_EBC080	I	3986436	10	4915	-	224	Sk
6_JB842_EBC080_J_S_07_12_4883	JB842_EBC080	I	3986441	0	4871	-	224	Sk
[truncated: 6,504 more rows]

## Sheet: S4_Jeffares_etal
#Supplementary Table S4. List of transposable elements found in Jeffares et al.
Lists all LTR elements, presence/absence in each strain.
Table edited from Jeffares et al. Nature Genetics 47 (3), 235-241 (2015).
presence-absence matrix
chr	start	stop	JB1110	JB1117	JB1154	JB1171	JB1174	JB1180	JB1197	JB1205	JB1206	JB1207	JB22	JB4	JB758	JB760	JB762	JB837	JB838	JB840	JB841	JB842	JB845	JB846	JB848	JB852	JB853	JB854	JB858	JB862	JB864	JB869	JB870	JB871	JB872	JB873	JB874	JB875	JB878	JB879	JB884	JB899	JB900	JB902	JB910	JB913	JB914	JB916	JB917
I	99236	99243	0	0	0	0	0	1	0	0	0	0	0	0	0	0	0	0	0	0	0	0	0	0	0	0	0	0	0	0	0	0	0	0	0	0	0	0	0	0	0	0	0	0	0	0	0	0	0
I	99280	99287	0	0	0	0	0	0	0	0	0	0	0	0	0	0	0	0	0	0	0	0	0	0	0	0	0	0	0	0	0	0	0	0	0	0	0	0	0	0	0	0	0	0	0	0	0	0	0
I	104721	104727	0	0	0	0	0	0	0	0	0	0	0	0	0	0	0	0	0	0	0	0	0	0	0	0	0	0	0	0	0	0	0	0	0	0	0	0	0	0	0	0	0	0	0	1	0	0	0
I	104787	104792	0	0	0	0	0	0	0	0	0	0	0	0	0	0	0	0	0	0	0	1	0	0	0	0	0	0	0	0	0	0	0	0	0	0	0	0	0	0	0	0	0	0	0	0	0	0	0
I	107836	107837	0	0	0	0	0	0	0	0	0	0	0	0	0	0	0	1	0	0	0	0	0	0	0	0	0	0	0	0	0	0	0	0	0	0	0	0	0	0	0	0	0	0	0	0	0	0	0
I	146668	146669	0	0	0	0	0	0	0	0	0	0	0	0	0	0	0	0	0	0	0	0	0	0	0	0	0	0	0	0	0	0	0	0	0	0	0	0	0	0	0	0	0	0	0	0	0	0	0
I	158009	158010	0	0	0	0	0	0	0	0	0	0	0	0	0	0	0	0	0	0	0	0	0	0	0	0	0	0	0	0	0	0	0	0	0	0	0	0	0	0	0	0	1	0	0	0	0	0	0
I	208285	208286	0	0	0	0	0	0	0	0	0	0	0	0	0	0	0	0	0	0	0	0	0	0	0	0	0	0	0	1	0	0	0	0	0	0	0	0	0	0	0	0	0	0	0	0	0	0	0
I	240776	240783	0	0	0	0	0	0	0	0	0	0	0	0	0	0	0	0	0	0	0	0	0	0	0	0	0	0	0	0	0	0	0	0	0	0	0	0	0	0	0	0	0	1	0	0	0	0	0
I	247853	247854	0	0	0	0	0	0	0	0	0	0	0	0	0	0	0	0	0	0	0	0	0	0	0	0	0	0	0	0	0	0	0	0	0	0	0	0	0	0	0	0	0	0	0	0	0	0	0
I	304362	304363	0	0	0	0	0	1	0	0	0	0	0	0	0	0	0	0	0	0	0	0	0	0	0	0	0	0	0	0	0	0	0	0	0	0	0	0	0	0	0	0	0	0	0	0	0	0	0
I	384697	384698	0	0	0	0	0	1	0	0	0	0	0	0	0	0	0	0	0	0	0	0	0	0	0	0	0	0	0	0	0	0	0	0	0	0	0	0	0	0	0	0	0	0	0	0	0	0	0
I	489886	489887	0	0	0	0	0	0	0	0	0	0	0	0	1	0	0	0	0	0	0	0	0	0	0	0	0	0	0	0	0	0	0	0	0	0	0	0	0	0	0	0	0	0	0	0	0	0	0
I	513490	513491	0	0	0	0	0	0	0	0	0	0	0	0	0	0	0	0	0	0	0	0	0	0	0	0	0	0	0	0	0	0	0	0	0	0	0	0	0	0	0	0	0	0	1	0	0	0	0
I	520120	520121	0	0	0	0	0	0	0	0	0	0	0	0	0	0	0	0	0	0	0	0	0	0	0	0	0	0	0	0	0	0	0	0	0	0	0	0	0	0	0	0	0	0	0	0	0	0	1
I	581901	581902	0	0	0	0	0	0	0	0	0	0	0	0	0	0	0	0	0	0	0	0	0	0	0	0	0	0	0	0	0	0	0	0	0	0	0	0	0	0	0	0	0	0	0	0	0	0	0
I	664259	664264	0	1	0	0	0	0	0	0	0	0	0	0	0	0	0	0	0	0	0	0	0	0	0	0	0	0	0	0	0	0	0	0	0	0	0	0	0	0	0	0	0	0	0	0	0	0	0
I	664272	664277	0	0	0	0	0	0	0	0	0	0	0	0	0	0	0	0	0	0	0	0	0	0	0	0	0	0	0	0	0	0	0	0	0	0	0	0	0	0	0	0	0	0	0	0	0	0	0
I	664272	664277	0	0	0	0	0	0	0	0	0	0	0	0	0	0	0	0	0	0	0	1	0	0	0	0	0	0	0	0	0	0	0	0	0	0	0	0	0	0	0	0	0	0	0	0	0	0	0
I	683825	683826	0	0	0	0	0	0	0	0	0	0	0	0	0	0	0	0	0	0	0	0	0	0	0	0	0	0	0	0	0	0	0	0	0	0	0	0	0	0	0	0	0	0	0	0	0	0	0
I	686462	686463	0	0	0	0	0	0	0	0	0	0	0	0	0	0	0	0	0	0	0	0	0	0	0	0	0	0	0	0	0	0	0	0	0	0	0	0	0	0	0	0	0	0	0	0	0	0	0
I	757233	757234	1	0	0	0	0	0	0	0	0	0	0	0	0	0	0	0	0	0	0	0	0	0	0	0	0	0	0	0	0	0	0	0	0	0	0	0	0	0	0	0	0	0	0	0	0	0	0
I	843219	843220	0	0	0	0	0	1	0	0	0	0	0	0	0	0	0	0	0	0	0	0	0	0	0	0	0	0	0	0	0	0	0	0	0	0	0	0	0	0	0	0	0	0	0	0	0	0	0
I	872730	872731	0	0	0	0	0	0	0	0	0	0	0	0	0	0	0	0	0	0	0	0	0	0	0	0	0	0	0	0	0	0	0	0	0	0	0	0	0	0	0	0	0	0	0	0	0	0	1
I	894575	894576	0	0	0	0	0	0	0	0	0	0	0	0	0	0	0	0	0	0	0	1	0	0	0	0	0	0	0	0	0	0	0	0	0	0	0	0	0	0	0	0	0	0	0	0	0	0	0
I	894920	894921	0	0	0	0	0	0	0	0	0	0	0	0	0	0	0	0	0	0	0	0	0	0	0	0	0	0	0	0	0	0	0	0	0	1	0	0	0	0	0	0	0	0	0	0	0	0	0
I	899074	899075	0	0	0	0	0	0	0	0	0	0	0	0	0	0	1	0	0	0	0	0	0	0	0	0	0	0	0	0	0	0	0	0	0	0	0	0	0	0	0	0	0	0	0	0	0	0	0
I	911815	911816	0	0	0	0	0	0	0	0	0	0	0	0	0	0	0	0	0	0	0	1	0	0	0	0	0	0	0	0	0	0	0	0	0	0	0	0	0	0	0	0	0	0	0	0	0	0	0
I	949117	949118	0	0	0	0	0	0	0	0	0	0	0	0	0	0	0	1	0	0	0	0	0	0	0	0	0	0	0	0	0	0	0	0	0	0	0	0	0	0	0	0	0	0	0	0	0	0	0
I	988124	988125	0	0	0	0	0	0	0	0	0	0	0	0	1	0	0	0	0	0	0	0	0	0	0	0	0	0	0	0	0	0	0	0	0	0	0	0	0	0	0	0	0	0	0	0	0	0	0
I	1003909	1003910	0	0	0	0	0	0	0	0	0	0	0	0	0	0	0	0	0	0	0	0	0	0	0	0	0	0	0	0	0	0	0	0	0	0	0	0	0	0	0	0	0	0	0	0	0	0	0
I	1008050	1008051	0	0	0	0	0	0	0	0	0	0	0	0	0	0	0	0	0	0	0	1	0	0	0	0	0	0	0	0	0	0	0	0	0	0	0	0	0	0	0	0	0	0	0	0	0	0	0
I	1054542	1054543	0	0	0	0	0	0	0	0	0	0	0	0	0	0	0	0	0	0	0	0	0	0	0	0	0	0	0	0	0	0	0	0	0	0	0	0	0	0	0	0	0	0	0	1	0	0	0
I	1057614	1057615	0	0	0	0	0	0	0	0	0	0	0	0	0	0	0	0	0	0	0	0	0	0	0	0	0	0	0	0	0	0	0	0	0	0	0	0	0	0	0	0	0	0	0	0	0	0	0
I	1058246	1058251	0	0	0	0	0	0	0	0	0	0	0	0	0	0	0	0	0	0	0	0	0	0	0	0	0	0	0	0	0	0	0	0	0	0	0	0	0	0	0	0	0	0	0	0	0	0	0
I	1058280	1058285	0	0	0	0	0	0	0	0	0	0	0	0	0	0	0	0	0	0	0	0	0	0	0	0	0	0	0	0	0	0	0	0	0	0	0	0	0	0	0	0	0	1	0	0	0	0	0
I	1099544	1099550	0	0	0	0	0	0	0	0	0	0	0	0	0	0	0	0	0	0	0	1	0	0	0	0	0	0	0	0	0	0	0	0	0	0	0	0	0	0	0	0	0	0	0	0	0	0	0
I	1099636	1099641	0	0	0	0	0	0	0	0	0	0	0	0	0	0	0	0	0	0	0	0	0	0	0	0	0	0	0	0	0	0	0	0	0	0	0	0	0	0	0	0	0	0	0	1	0	0	0
I	1180013	1180018	0	0	0	0	1	0	0	0	0	0	0	0	0	0	0	0	0	0	0	0	0	0	0	0	0	0	0	0	0	0	0	0	0	0	0	0	0	0	0	0	0	0	0	0	0	0	0
I	1180013	1180018	0	0	0	0	0	0	0	0	0	0	0	0	0	0	0	0	0	0	0	0	0	0	0	0	0	0	0	0	0	0	0	0	0	0	0	0	0	0	0	0	0	0	0	0	0	0	0
I	1180017	1180022	0	0	0	0	0	0	0	0	0	0	0	0	1	0	0	0	0	0	0	0	0	0	0	0	0	0	0	0	0	0	0	0	0	0	0	0	0	0	0	0	0	0	0	0	0	0	0
I	1206130	1206131	0	0	0	0	1	0	0	0	0	0	0	0	0	0	0	0	0	0	0	0	0	0	0	0	0	0	0	0	0	0	0	0	0	0	0	0	0	0	0	0	0	0	0	0	0	0	0
I	1206469	1206470	0	0	0	0	0	0	0	0	0	0	0	0	0	0	0	0	0	0	0	0	0	0	0	0	0	0	0	0	0	0	0	0	0	0	0	0	0	0	0	0	0	0	0	1	0	0	0
I	1216691	1216692	0	0	0	0	0	0	0	0	0	0	0	0	0	0	0	0	0	0	0	0	0	0	0	0	0	0	0	0	0	0	0	0	0	0	0	0	0	0	0	0	0	0	0	0	0	0	0
I	1255504	1255505	0	0	0	0	0	0	0	0	0	0	0	0	0	0	0	0	0	0	0	0	0	0	0	0	0	0	0	1	0	0	0	0	0	0	0	0	0	0	0	0	0	0	0	0	0	0	0
I	1335419	1335420	0	0	0	0	0	0	0	0	0	0	0	0	1	0	0	0	0	0	0	0	0	0	0	0	0	0	0	0	0	0	0	0	0	0	0	0	0	0	0	0	0	0	0	0	0	0	0
I	1375581	1375582	0	0	0	0	0	1	0	0	0	0	0	0	0	0	0	0	0	0	0	0	0	0	0	0	0	0	0	0	0	0	0	0	0	0	0	0	0	0	0	0	0	0	0	0	0	0	0
I	1381788	1381789	0	0	0	0	0	0	0	0	0	0	0	0	1	0	0	0	0	0	0	0	0	0	0	0	0	0	0	0	0	0	0	0	0	0	0	0	0	0	0	0	0	0	0	0	0	0	0
I	1411295	1411296	0	0	0	0	0	0	0	0	0	0	0	0	0	0	0	0	0	0	0	0	0	0	0	0	0	1	0	0	0	0	0	0	0	0	0	0	0	0	0	0	0	0	0	0	0	0	0
I	1418879	1418880	0	0	0	0	0	0	0	0	0	0	0	0	0	0	0	0	0	0	0	1	0	0	0	0	0	0	0	0	0	0	0	0	0	0	0	0	0	0	0	0	0	0	0	0	0	0	0
I	1438215	1438216	0	0	0	0	0	0	0	0	0	0	0	0	0	0	0	0	0	0	0	0	0	0	0	0	0	0	0	0	0	0	0	0	0	0	0	0	0	0	0	0	0	0	1	0	0	0	0
I	1489946	1489947	0	0	0	0	0	0	0	0	0	0	0	0	0	0	0	0	0	0	0	1	0	0	0	0	0	0	0	0	0	0	0	0	0	0	0	0	0	0	0	0	0	0	0	0	0	0	0
I	1494034	1494039	0	0	0	0	0	0	0	0	0	0	0	0	0	0	0	0	0	1	0	0	0	0	0	0	0	0	0	0	0	0	0	0	0	0	0	0	0	0	0	0	0	0	0	0	0	0	0
I	1494034	1494039	0	1	0	0	0	0	0	0	0	0	0	0	0	0	0	0	0	0	0	0	0	0	0	0	0	0	0	0	0	0	0	0	0	0	0	0	0	0	0	0	0	0	0	0	0	0	0
I	1529895	1529906	0	0	0	0	0	0	0	0	0	0	0	0	0	0	0	0	0	0	0	0	0	1	0	0	0	0	0	0	0	0	0	0	0	0	0	0	0	0	0	0	0	0	0	0	0	0	0
I	1542450	1542451	0	0	0	0	0	0	1	0	0	0	0	0	0	0	0	0	0	0	0	0	0	0	0	0	0	0	0	0	0	0	0	0	0	0	0	0	0	0	0	0	0	0	0	0	0	0	0
I	1574093	1574094	0	0	0	0	0	0	0	0	0	0	0	0	0	0	0	1	0	0	0	0	0	0	0	0	0	0	0	0	0	0	0	0	0	0	0	0	0	0	0	0	0	0	0	0	0	0	0
I	1582512	1582513	1	0	0	0	0	0	0	0	0	0	0	0	0	0	0	0	0	0	0	0	0	0	0	0	0	0	0	0	0	0	0	0	0	0	0	0	0	0	0	0	0	0	0	0	0	0	0
I	1611406	1611407	0	0	0	0	0	0	0	0	0	0	0	0	0	0	0	0	0	0	0	0	0	0	0	0	0	0	0	0	0	0	0	0	0	0	0	0	0	0	0	0	0	0	0	0	0	0	0
I	1673742	1673743	0	0	0	0	0	0	0	0	0	0	0	0	0	0	0	0	0	0	0	0	0	0	0	0	0	0	0	0	0	0	0	0	0	0	0	1	0	0	0	0	0	0	0	0	0	0	0
I	1690191	1690192	0	0	0	0	0	0	0	0	0	0	0	0	0	0	0	0	0	0	0	0	0	0	0	0	0	0	0	0	0	0	0	0	0	0	0	0	0	0	0	0	0	1	0	0	0	0	0
I	1701731	1701732	0	0	0	0	0	0	0	0	0	0	0	0	0	0	0	0	0	0	0	0	0	0	0	0	0	0	0	0	0	0	0	0	0	0	0	0	0	0	0	0	0	0	0	0	0	0	0
I	1704252	1704253	0	0	0	0	0	0	0	0	0	0	0	0	0	0	0	0	0	0	0	0	0	0	0	0	0	0	0	0	0	0	0	0	0	0	0	0	0	0	0	0	1	0	0	0	0	0	0
I	1725452	1725453	0	0	0	0	0	0	0	0	0	0	0	0	0	0	0	0	0	0	0	0	0	0	1	0	0	0	0	0	0	0	0	0	0	0	0	0	0	0	0	0	0	0	0	0	0	0	0
I	1739860	1739861	0	0	0	0	0	1	0	0	0	0	0	0	0	0	0	0	0	0	0	0	0	0	0	0	0	0	0	0	0	0	0	0	0	0	0	0	0	0	0	0	0	0	0	0	0	0	0
I	1786244	1786245	0	0	0	0	0	1	0	0	0	0	0	0	0	0	0	0	0	0	0	0	0	0	0	0	0	0	0	0	0	0	0	0	0	0	0	0	0	0	0	0	0	0	0	0	0	0	0
I	1816496	1816497	0	0	0	0	0	1	0	0	0	0	0	0	0	0	0	0	0	0	0	0	0	0	0	0	0	0	0	0	0	0	0	0	0	0	0	0	0	0	0	0	0	0	0	0	0	0	0
I	1831980	1831981	0	0	0	0	0	0	0	0	0	0	0	0	0	0	0	0	0	0	0	0	0	0	0	0	0	0	0	0	0	0	0	0	0	0	0	0	0	0	0	0	0	0	0	0	0	0	0
I	1834842	1834843	0	0	0	0	0	1	0	0	0	0	0	0	0	0	0	0	0	0	0	0	0	0	0	0	0	0	0	0	0	0	0	0	0	0	0	0	0	0	0	0	0	0	0	0	0	0	0
I	1838459	1838460	0	0	0	0	0	0	0	0	0	0	0	0	0	0	0	0	0	0	0	0	0	0	0	0	1	0	0	0	0	0	0	0	0	0	0	0	0	0	0	0	0	0	0	0	0	0	0
I	1874260	1874261	0	0	0	0	0	0	0	0	0	0	0	0	0	0	0	0	0	0	0	0	0	0	0	0	0	0	0	0	0	0	0	0	0	0	0	0	0	0	0	0	0	0	0	0	0	0	0
I	1882001	1882029	0	0	0	0	1	0	0	0	0	0	0	0	0	0	0	0	0	0	0	0	0	0	0	0	0	0	0	0	0	0	0	0	0	0	0	0	0	0	0	0	0	0	0	0	0	0	0
I	1887041	1887042	0	0	0	0	0	1	0	0	0	0	0	0	0	0	0	0	0	0	0	0	0	0	0	0	0	0	0	0	0	0	0	0	0	0	0	0	0	0	0	0	0	0	0	0	0	0	0
I	1897304	1897310	0	0	0	0	0	0	0	0	0	0	0	0	0	0	0	0	0	0	0	0	0	0	0	0	0	0	0	0	0	0	0	0	0	1	0	0	0	0	0	0	0	0	0	0	0	0	0
I	1897338	1897344	0	0	0	0	0	0	0	0	0	0	0	0	0	0	1	0	0	0	0	0	0	0	0	0	0	0	0	0	0	0	0	0	0	0	0	0	0	0	0	0	0	0	0	0	0	0	0
I	1902048	1902049	0	0	0	0	0	0	0	0	0	0	0	0	0	0	0	0	0	0	0	0	0	0	0	0	0	0	0	0	0	0	0	0	0	0	0	0	0	0	0	0	0	0	1	0	0	0	0
I	1915926	1915927	0	0	0	0	0	0	0	0	0	0	0	0	1	0	0	0	0	0	0	0	0	0	0	0	0	0	0	0	0	0	0	0	0	0	0	0	0	0	0	0	0	0	0	0	0	0	0
I	1928479	1928480	0	1	0	0	0	0	0	0	0	0	0	0	0	0	0	0	0	0	0	0	0	0	0	0	0	0	0	0	0	0	0	0	0	0	0	0	0	0	0	0	0	0	0	0	0	0	0
I	1968782	1968783	0	0	0	0	0	0	0	0	0	0	0	0	0	0	0	0	0	0	0	0	0	0	0	0	0	0	0	0	0	0	0	0	0	0	0	0	0	0	0	0	0	0	0	0	0	0	1
I	1973249	1973250	0	0	0	0	0	0	0	0	0	0	0	0	0	0	0	0	0	0	0	0	0	0	0	0	0	0	0	0	0	0	0	0	0	0	0	0	0	0	0	0	0	0	1	0	0	0	0
I	1996834	1996835	0	0	0	0	0	0	0	0	0	0	0	0	0	0	0	0	0	0	0	0	1	0	0	0	0	0	0	0	0	0	0	0	0	0	0	0	0	0	0	0	0	0	0	0	0	0	0
I	2030503	2030504	0	0	0	0	0	0	0	0	0	0	0	0	0	0	0	0	0	0	0	0	0	0	0	0	0	0	0	0	0	0	0	0	0	0	0	0	0	0	0	0	0	0	0	0	0	0	0
I	2106052	2106060	0	0	0	0	0	0	0	0	0	0	0	0	0	0	0	0	0	0	0	0	0	0	0	0	0	0	0	1	0	0	0	0	0	0	0	0	0	0	0	0	0	0	0	0	0	0	0
I	2106088	2106094	0	0	0	0	0	0	0	0	0	0	0	0	0	0	0	0	0	0	0	0	0	0	0	0	0	0	0	0	0	0	0	0	0	0	0	1	0	0	0	0	0	0	0	0	0	0	0
I	2133082	2133083	0	0	0	0	0	0	0	0	0	0	0	0	0	0	0	0	0	0	0	0	0	0	0	0	0	0	0	0	0	0	0	0	0	0	0	1	0	0	0	0	0	0	0	0	0	0	0
I	2145192	2145193	0	0	0	0	0	0	0	0	0	0	0	0	0	0	0	0	0	0	0	0	0	0	0	0	0	0	0	1	0	0	0	0	0	0	0	0	0	0	0	0	0	0	0	0	0	0	0
I	2154515	2154524	0	0	0	0	0	1	0	0	0	0	0	0	0	0	0	0	0	0	0	0	0	0	0	0	0	0	0	0	0	0	0	0	0	0	0	0	0	0	0	0	0	0	0	0	0	0	0
I	2154530	2154535	0	0	0	0	0	0	1	0	0	0	0	0	0	0	0	0	0	0	0	0	0	0	0	0	0	0	0	0	0	0	0	0	0	0	0	0	0	0	0	0	0	0	0	0	0	0	0
I	2203197	2203198	0	0	0	0	0	0	0	0	0	0	0	0	0	0	0	0	0	0	0	0	0	0	0	0	1	0	0	0	0	0	0	0	0	0	0	0	0	0	0	0	0	0	0	0	0	0	0
I	2208518	2208519	0	0	0	0	0	0	0	0	0	0	0	0	0	0	1	0	0	0	0	0	0	0	0	0	0	0	0	0	0	0	0	0	0	0	0	0	0	0	0	0	0	0	0	0	0	0	0
I	2254482	2254483	0	0	0	0	0	0	0	0	0	0	0	0	0	0	0	0	0	0	0	0	0	0	0	0	0	0	0	1	0	0	0	0	0	0	0	0	0	0	0	0	0	0	0	0	0	0	0
I	2290200	2290201	0	0	0	0	0	0	0	0	0	0	0	0	0	0	0	0	0	0	0	0	0	0	0	0	0	0	0	0	0	0	0	0	0	0	0	0	0	0	0	0	0	0	0	0	0	0	0
I	2298708	2298714	0	0	0	0	0	0	0	0	0	0	0	0	0	0	0	0	0	0	0	0	0	0	0	0	1	0	0	0	0	0	0	0	0	0	0	0	0	0	0	0	0	0	0	0	0	0	0
I	2298752	2298757	0	1	0	0	0	0	0	0	0	0	0	0	0	0	0	0	0	0	0	0	0	0	0	0	0	0	0	0	0	0	0	0	0	0	0	0	0	0	0	0	0	0	0	0	0	0	0
I	2298787	2298792	0	0	0	0	0	0	0	0	0	0	0	0	0	0	0	0	0	0	0	0	0	0	0	0	0	0	0	0	0	0	0	0	0	0	0	0	0	0	0	0	0	0	0	0	0	0	1
I	2382428	2382429	0	0	0	0	0	0	0	0	0	0	0	0	0	0	0	0	0	0	0	0	0	0	0	0	0	0	0	0	0	0	0	0	0	0	0	0	0	0	0	0	0	0	0	1	0	0	0
I	2401672	2401673	0	0	0	0	0	1	0	0	0	0	0	0	0	0	0	0	0	0	0	0	0	0	0	0	0	0	0	0	0	0	0	0	0	0	0	0	0	0	0	0	0	0	0	0	0	0	0
I	2423940	2423941	0	0	0	0	0	0	0	0	0	0	0	0	0	0	0	0	0	0	0	0	0	0	0	0	0	0	0	0	0	0	0	0	0	0	0	0	0	0	1	0	0	0	0	0	0	0	0
I	2495431	2495437	0	0	0	0	0	0	0	0	0	0	0	0	0	0	0	0	0	0	0	0	0	0	0	0	0	0	0	0	0	0	0	0	0	0	0	0	0	0	0	0	0	1	0	0	0	0	0
I	2495499	2495504	0	0	0	0	0	0	0	0	0	0	0	0	0	0	0	0	0	0	0	0	0	0	0	0	0	0	0	0	0	0	0	0	0	0	0	0	0	0	0	0	0	0	0	0	0	0	0
I	2528954	2528955	0	0	0	0	0	1	0	0	0	0	0	0	0	0	0	0	0	0	0	0	0	0	0	0	0	0	0	0	0	0	0	0	0	0	0	0	0	0	0	0	0	0	0	0	0	0	0
I	2533314	2533315	0	0	0	0	0	0	0	0	0	0	0	0	0	0	0	0	0	0	0	0	0	0	1	0	0	0	0	0	0	0	0	0	0	0	0	0	0	0	0	0	0	0	0	0	0	0	0
I	2542746	2542747	0	0	0	0	0	1	0	0	0	0	0	0	0	0	0	0	0	0	0	0	0	0	0	0	0	0	0	0	0	0	0	0	0	0	0	0	0	0	0	0	0	0	0	0	0	0	0
I	2543304	2543305	0	0	0	0	0	0	0	0	0	0	0	0	0	0	0	0	0	0	0	0	0	0	0	0	0	0	0	0	0	0	0	0	0	0	0	0	0	0	0	0	0	0	0	0	0	0	0
I	2574657	2574658	0	0	0	0	0	0	0	0	0	0	0	0	0	0	0	0	0	0	0	0	0	0	0	0	0	0	0	0	0	0	0	0	0	0	0	0	0	0	0	0	0	0	0	1	0	0	0
I	2590138	2590139	0	0	0	0	0	0	0	0	0	0	0	0	1	0	0	0	0	0	0	0	0	0	0	0	0	0	0	0	0	0	0	0	0	0	0	0	0	0	0	0	0	0	0	0	0	0	0
I	2594264	2594265	0	0	0	0	0	0	0	0	0	0	0	0	0	0	0	0	0	0	0	0	0	0	0	0	0	0	0	1	0	0	0	0	0	0	0	0	0	0	0	0	0	0	0	0	0	0	0
I	2600823	2600824	0	0	0	0	0	0	0	0	0	0	0	0	0	0	0	0	0	1	0	0	0	0	0	0	0	0	0	0	0	0	0	0	0	0	0	0	0	0	0	0	0	0	0	0	0	0	0
I	2661573	2661574	0	0	0	0	0	0	0	0	0	0	0	0	0	0	0	0	0	0	0	0	0	0	0	0	0	0	0	0	0	0	0	0	0	0	0	0	0	0	0	0	0	0	0	0	0	0	0
I	2671706	2671707	0	0	0	0	0	0	0	0	0	0	0	0	0	0	0	0	0	0	0	0	0	0	0	0	0	0	0	1	0	0	0	0	0	0	0	0	0	0	0	0	0	0	0	0	0	0	0
I	2720308	2720309	1	0	0	0	0	0	0	0	0	0	0	0	0	0	0	0	0	0	0	0	0	0	0	0	0	0	0	0	0	0	0	0	0	0	0	0	0	0	0	0	0	0	0	0	0	0	0
I	2787042	2787043	0	0	0	0	0	0	0	0	0	0	0	0	0	0	0	0	0	0	0	0	0	0	0	0	0	0	0	0	0	0	0	0	0	0	0	0	1	0	0	0	0	0	0	0	0	0	0
I	2793583	2793584	0	0	0	0	0	0	0	0	0	0	0	0	0	0	1	0	0	0	0	0	0	0	0	0	0	0	0	0	0	0	0	0	0	0	0	0	0	0	0	0	0	0	0	0	0	0	0
I	2821321	2821322	0	0	0	0	0	0	0	0	0	0	0	0	0	0	0	0	0	0	0	0	0	1	0	0	0	0	0	0	0	0	0	0	0	0	0	0	0	0	0	0	0	0	0	0	0	0	0
I	2841947	2841948	0	0	0	0	0	0	0	0	0	0	0	0	1	0	0	0	0	0	0	0	0	0	0	0	0	0	0	0	0	0	0	0	0	0	0	0	0	0	0	0	0	0	0	0	0	0	0
I	2844328	2844329	0	0	0	0	0	0	0	0	0	0	0	0	0	0	0	0	0	0	0	0	0	0	0	0	0	0	0	0	0	0	0	0	0	0	0	0	0	0	1	0	0	0	0	0	0	0	0
I	2892986	2892987	0	0	0	0	0	0	0	0	0	0	0	0	0	0	0	0	0	0	0	0	0	0	0	0	0	0	0	0	0	0	0	0	0	0	0	0	0	0	0	0	0	0	0	0	0	0	1
I	2920302	2920308	0	0	0	1	0	0	0	0	0	0	0	0	0	0	0	0	0	0	0	0	0	0	0	0	0	0	0	0	0	0	0	0	0	0	0	0	0	0	0	0	0	0	0	0	0	0	0
I	2920823	2920824	0	0	0	0	0	0	0	0	0	0	0	0	0	0	0	0	0	0	0	0	0	0	0	0	0	0	0	0	0	0	0	0	0	0	0	0	0	0	0	0	0	1	0	0	0	0	0
I	2960535	2960536	0	0	0	0	0	0	0	0	0	0	0	0	0	0	0	1	0	0	0	0	0	0	0	0	0	0	0	0	0	0	0	0	0	0	0	0	0	0	0	0	0	0	0	0	0	0	0
I	2967821	2967822	0	0	0	0	0	0	0	0	0	0	0	0	0	0	0	0	0	0	0	0	0	0	0	0	0	0	0	0	0	0	0	0	0	0	0	0	0	0	0	0	0	0	0	0	0	0	0
I	2976204	2976205	0	0	0	0	0	1	0	0	0	0	0	0	0	0	0	0	0	0	0	0	0	0	0	0	0	0	0	0	0	0	0	0	0	0	0	0	0	0	0	0	0	0	0	0	0	0	0
I	2993291	2993292	0	0	0	0	0	0	0	0	0	0	0	0	0	0	0	0	0	0	0	0	0	0	0	0	0	0	0	0	0	0	0	0	0	0	0	0	0	0	0	0	0	0	0	0	0	0	0
I	3009493	3009494	0	0	0	0	0	0	0	0	0	0	0	0	0	0	1	0	0	0	0	0	0	0	0	0	0	0	0	0	0	0	0	0	0	0	0	0	0	0	0	0	0	0	0	0	0	0	0
I	3018992	3018993	0	0	0	0	0	0	0	0	0	0	0	0	0	0	0	0	0	0	0	0	0	0	0	0	1	0	0	0	0	0	0	0	0	0	0	0	0	0	0	0	0	0	0	0	0	0	0
I	3031731	3031736	0	0	0	0	0	0	0	0	0	0	0	0	0	0	1	0	0	0	0	0	0	0	0	0	0	0	0	0	0	0	0	0	0	0	0	0	0	0	0	0	0	0	0	0	0	0	0
I	3031832	3031837	0	0	0	0	0	0	0	0	0	0	0	0	0	0	0	0	0	0	0	0	0	0	0	0	0	0	0	0	0	0	0	0	0	0	0	0	0	0	0	0	1	0	0	0	0	0	0
I	3037569	3037570	0	0	0	0	0	0	0	0	0	0	0	0	1	0	0	0	0	0	0	0	0	0	0	0	0	0	0	0	0	0	0	0	0	0	0	0	0	0	0	0	0	0	0	0	0	0	0
I	3150695	3150696	0	0	0	0	0	0	0	0	0	0	0	0	1	0	0	0	0	0	0	0	0	0	0	0	0	0	0	0	0	0	0	0	0	0	0	0	0	0	0	0	0	0	0	0	0	0	0
I	3211724	3211730	0	0	0	0	0	0	0	0	0	0	0	0	0	0	0	0	0	0	0	0	0	0	0	0	0	0	0	0	0	0	0	0	0	0	0	0	0	0	0	0	1	0	0	0	0	0	0
I	3211749	3211755	0	0	0	0	0	0	0	0	0	0	0	0	0	0	0	0	0	0	0	0	0	0	0	0	1	0	0	0	0	0	0	0	0	0	0	0	0	0	0	0	0	0	0	0	0	0	0
I	3233537	3233538	0	0	0	0	0	0	0	0	0	0	0	0	0	0	0	0	0	0	0	0	0	0	0	0	0	0	0	0	0	0	0	0	0	0	0	0	0	0	0	0	1	0	0	0	0	0	0
I	3286493	3286498	0	0	0	0	0	0	0	0	0	0	0	0	0	0	0	0	0	0	0	0	0	0	0	0	0	0	0	0	0	0	0	0	0	0	0	0	0	0	0	0	0	0	0	0	0	0	0
I	3286502	3286509	0	0	0	0	0	0	0	0	0	0	0	0	1	0	0	0	0	0	0	0	0	0	0	0	0	0	0	0	0	0	0	0	0	0	0	0	0	0	0	0	0	0	0	0	0	0	0
I	3316705	3316706	0	0	0	0	0	0	0	0	0	0	0	0	1	0	0	0	0	0	0	0	0	0	0	0	0	0	0	0	0	0	0	0	0	0	0	0	0	0	0	0	0	0	0	0	0	0	0
I	3319044	3319050	0	0	0	0	0	1	0	0	0	0	0	0	0	0	0	0	0	0	0	0	0	0	0	0	0	0	0	0	0	0	0	0	0	0	0	0	0	0	0	0	0	0	0	0	0	0	0
I	3410810	3410811	0	0	0	0	0	1	0	0	0	0	0	0	0	0	0	0	0	0	0	0	0	0	0	0	0	0	0	0	0	0	0	0	0	0	0	0	0	0	0	0	0	0	0	0	0	0	0
I	3425817	3425818	0	0	0	0	0	0	0	0	0	1	0	0	0	0	0	0	0	0	0	0	0	0	0	0	0	0	0	0	0	0	0	0	0	0	0	0	0	0	0	0	0	0	0	0	0	0	0
I	3442410	3442411	0	0	0	0	0	0	0	0	0	0	0	0	0	0	0	0	0	0	0	0	0	0	0	0	0	0	0	0	0	0	0	0	0	0	0	1	0	0	0	0	0	0	0	0	0	0	0
I	3498893	3498894	0	0	0	0	0	0	0	0	0	0	0	0	0	0	0	0	0	0	0	0	0	0	0	0	0	0	0	0	0	0	0	0	0	0	0	0	0	0	0	0	0	0	0	0	0	0	0
I	3515466	3515467	0	0	0	0	0	0	1	0	0	0	0	0	0	0	0	0	0	0	0	0	0	0	0	0	0	0	0	0	0	0	0	0	0	0	0	0	0	0	0	0	0	0	0	0	0	0	0
I	3549053	3549054	0	0	0	0	0	0	0	0	0	0	0	0	0	0	0	0	0	0	0	0	0	0	0	0	0	0	0	0	0	0	0	0	0	0	0	0	0	0	0	0	0	0	0	0	0	0	0
I	3646731	3646732	0	0	0	0	0	0	0	0	0	0	0	0	0	0	0	0	0	0	0	0	0	0	0	0	1	0	0	0	0	0	0	0	0	0	0	0	0	0	0	0	0	0	0	0	0	0	0
I	3663656	3663657	0	0	0	0	0	0	0	0	0	0	0	0	0	0	0	0	0	0	0	0	0	0	0	0	0	0	0	0	0	0	0	0	0	0	0	0	0	0	0	0	0	1	0	0	0	0	0
I	3664227	3664228	0	0	0	0	0	0	0	0	0	0	0	0	1	0	0	0	0	0	0	0	0	0	0	0	0	0	0	0	0	0	0	0	0	0	0	0	0	0	0	0	0	0	0	0	0	0	0
I	3688462	3688463	0	0	0	0	0	0	0	0	0	0	0	0	0	0	0	0	0	0	0	0	0	0	0	0	0	0	0	0	0	0	0	0	0	0	0	0	0	0	0	0	0	0	0	0	0	0	1
I	3701959	3701965	0	0	0	0	0	0	0	0	0	0	0	0	0	0	0	0	0	0	0	0	0	0	0	0	0	0	0	0	0	0	0	0	0	0	0	0	0	0	0	0	0	1	0	0	0	0	0
I	3702056	3702062	0	0	0	0	0	1	0	0	0	0	0	0	0	0	0	0	0	0	0	0	0	0	0	0	0	0	0	0	0	0	0	0	0	0	0	0	0	0	0	0	0	0	0	0	0	0	0
I	3826269	3826270	0	0	0	0	0	0	0	0	0	0	0	0	0	0	0	0	0	0	0	0	0	0	0	0	0	0	0	0	0	0	0	0	0	0	0	0	0	0	0	0	0	0	0	0	0	0	0
I	3832360	3832361	1	0	0	0	0	0	0	0	0	0	0	0	0	0	0	0	0	0	0	0	0	0	0	0	0	0	0	0	0	0	0	0	0	0	0	0	0	0	0	0	0	0	0	0	0	0	0
I	3850872	3850873	0	0	0	0	0	0	0	0	0	0	0	0	0	0	0	0	0	0	0	0	0	0	0	0	0	0	0	0	0	0	0	0	0	0	0	0	0	0	0	0	0	0	0	0	0	0	0
I	3880199	3880200	0	0	0	0	0	0	0	0	0	0	0	0	0	0	0	0	0	0	0	0	0	0	0	0	0	0	0	0	0	0	0	0	0	0	0	0	0	0	0	0	0	0	0	0	0	0	0
I	3887204	3887205	0	0	0	0	0	0	0	0	0	0	0	0	0	0	0	0	0	0	0	0	0	0	0	0	1	0	0	0	0	0	0	0	0	0	0	0	0	0	0	0	0	0	0	0	0	0	0
I	3899767	3899768	0	0	0	0	0	0	0	0	0	0	0	0	0	0	0	0	0	0	0	0	0	0	0	0	0	0	0	0	0	0	0	0	0	0	0	0	0	0	0	0	0	0	0	0	0	0	1
I	3924234	3924235	0	0	0	0	0	0	0	0	0	0	0	0	1	0	0	0	0	0	0	0	0	0	0	0	0	0	0	0	0	0	0	0	0	0	0	0	0	0	0	0	0	0	0	0	0	0	0
I	3934861	3934866	0	0	0	0	1	0	0	0	0	0	0	0	0	0	0	0	0	0	0	0	0	0	0	0	0	0	0	0	0	0	0	0	0	0	0	0	0	0	0	0	0	0	0	0	0	0	0
I	3934861	3934866	0	0	1	0	0	0	0	0	0	0	0	0	0	0	0	0	0	0	0	0	0	0	0	0	0	0	0	0	0	0	0	0	0	0	0	0	0	0	0	0	0	0	0	0	0	0	0
I	3942977	3942978	0	0	0	0	0	0	0	0	0	0	0	0	0	0	0	0	0	0	0	0	0	0	0	0	0	0	0	0	0	0	0	0	0	0	0	0	0	0	0	0	0	0	0	0	0	0	0
I	4013817	4013818	0	0	0	0	0	0	0	0	0	0	0	0	0	0	1	0	0	0	0	0	0	0	0	0	0	0	0	0	0	0	0	0	0	0	0	0	0	0	0	0	0	0	0	0	0	0	0
I	4065053	4065058	0	0	0	0	0	0	1	0	0	0	0	0	0	0	0	0	0	0	0	0	0	0	0	0	0	0	0	0	0	0	0	0	0	0	0	0	0	0	0	0	0	0	0	0	0	0	0
I	4065192	4065198	0	0	0	0	0	1	0	0	0	0	0	0	0	0	0	0	0	0	0	0	0	0	0	0	0	0	0	0	0	0	0	0	0	0	0	0	0	0	0	0	0	0	0	0	0	0	0
I	4103238	4103243	0	0	0	0	0	0	0	0	0	0	0	0	0	0	0	0	0	0	0	0	0	1	0	0	0	0	0	0	0	0	0	0	0	0	0	0	0	0	0	0	0	0	0	0	0	0	0
I	4103273	4103278	0	0	0	0	0	0	0	0	0	0	0	0	0	0	0	0	0	0	0	1	0	0	0	0	0	0	0	0	0	0	0	0	0	0	0	0	0	0	0	0	0	0	0	0	0	0	0
I	4105914	4105915	0	0	0	0	0	0	0	0	0	0	0	0	0	0	0	0	0	0	0	0	0	0	0	0	0	0	0	0	0	0	0	0	0	0	0	0	0	0	0	0	0	0	0	0	0	0	1
I	4139350	4139351	0	0	0	0	0	0	0	0	0	0	0	0	0	0	0	0	0	0	0	0	0	0	0	0	0	0	0	0	0	0	0	0	0	0	0	0	0	0	0	0	0	0	0	1	0	0	0
I	4142618	4142619	0	0	0	0	0	0	0	0	0	0	0	0	0	0	0	0	0	0	0	0	0	0	0	0	0	0	0	0	0	0	0	0	0	0	0	0	0	0	0	0	0	0	1	0	0	0	0
I	4143322	4143323	0	0	0	0	0	0	0	0	0	0	0	0	0	0	0	0	0	0	0	0	0	0	0	0	0	0	0	0	0	0	0	0	0	0	0	0	0	0	0	0	0	0	0	0	0	0	1
I	4153065	4153066	0	0	0	0	0	1	0	0	0	0	0	0	0	0	0	0	0	0	0	0	0	0	0	0	0	0	0	0	0	0	0	0	0	0	0	0	0	0	0	0	0	0	0	0	0	0	0
I	4200083	4200084	0	0	0	0	0	0	0	0	0	0	0	0	0	0	0	0	0	0	0	0	0	0	0	0	0	0	0	0	0	0	0	0	0	0	0	0	0	0	0	0	0	0	0	0	1	0	0
I	4219457	4219458	0	0	0	0	0	0	1	0	0	0	0	0	0	0	0	0	0	0	0	0	0	0	0	0	0	0	0	0	0	0	0	0	0	0	0	0	0	0	0	0	0	0	0	0	0	0	0
I	4223727	4223728	0	0	0	0	0	0	0	0	0	0	0	0	0	0	0	0	0	1	0	0	0	0	0	0	0	0	0	0	0	0	0	0	0	0	0	0	0	0	0	0	0	0	0	0	0	0	0
I	4299625	4299626	0	0	0	0	0	0	0	0	0	0	0	0	0	0	0	0	0	0	0	0	0	0	0	0	0	0	0	0	0	0	0	0	0	1	0	0	0	0	0	0	0	0	0	0	0	0	0
I	4384355	4384356	0	0	0	0	0	0	0	0	0	0	0	0	0	0	0	0	0	0	0	0	0	0	0	0	0	0	0	0	0	0	0	0	0	0	0	0	0	0	0	0	0	0	0	0	0	0	0
I	4394070	4394075	0	0	0	0	0	0	0	0	0	0	0	0	1	0	0	0	0	0	0	0	0	0	0	0	0	0	0	0	0	0	0	0	0	0	0	0	0	0	0	0	0	0	0	0	0	0	0
I	4401721	4401722	0	0	0	0	0	0	0	0	0	0	0	0	0	0	1	0	0	0	0	0	0	0	0	0	0	0	0	0	0	0	0	0	0	0	0	0	0	0	0	0	0	0	0	0	0	0	0
I	4455962	4455963	0	0	0	0	0	0	0	0	0	0	0	0	0	0	0	0	0	0	0	0	0	0	0	0	0	0	0	0	0	0	0	0	0	0	0	0	0	0	0	0	0	0	0	1	0	0	0
I	4475079	4475080	1	0	0	0	0	0	0	0	0	0	0	0	0	0	0	0	0	0	0	0	0	0	0	0	0	0	0	0	0	0	0	0	0	0	0	0	0	0	0	0	0	0	0	0	0	0	0
I	4498005	4498006	0	0	0	0	0	0	0	0	0	0	0	0	0	0	0	0	0	0	0	0	0	0	0	0	0	0	0	0	0	0	0	0	0	0	0	0	0	0	0	0	0	0	0	0	0	0	0
I	4531927	4531928	0	0	0	0	0	1	0	0	0	0	0	0	0	0	0	0	0	0	0	0	0	0	0	0	0	0	0	0	0	0	0	0	0	0	0	0	0	0	0	0	0	0	0	0	0	0	0
I	4548956	4548957	0	0	0	0	0	0	0	0	0	0	0	0	1	0	0	0	0	0	0	0	0	0	0	0	0	0	0	0	0	0	0	0	0	0	0	0	0	0	0	0	0	0	0	0	0	0	0
I	4553872	4553873	0	0	0	0	0	0	0	0	0	0	0	0	0	0	0	0	0	0	0	0	0	0	0	0	0	0	0	0	0	0	0	0	0	0	0	0	0	0	0	0	0	1	0	0	0	0	0
I	4578028	4578029	0	0	0	0	0	0	0	0	0	0	0	0	0	0	0	0	0	0	0	0	0	0	0	0	0	0	0	0	0	0	0	0	0	0	0	0	0	0	0	0	0	0	0	0	0	0	0
I	4605282	4605283	0	0	0	0	0	0	0	0	0	0	0	0	0	0	0	1	0	0	0	0	0	0	0	0	0	0	0	0	0	0	0	0	0	0	0	0	0	0	0	0	0	0	0	0	0	0	0
I	4664224	4664225	0	1	0	0	0	0	0	0	0	0	0	0	0	0	0	0	0	0	0	0	0	0	0	0	0	0	0	0	0	0	0	0	0	0	0	0	0	0	0	0	0	0	0	0	0	0	0
I	4680302	4680303	0	0	0	0	0	0	0	0	0	0	0	0	0	0	0	0	0	0	0	0	0	0	0	0	0	0	0	0	0	0	0	0	0	0	0	0	0	0	0	0	0	0	0	0	0	0	0
I	4709619	4709620	0	0	0	0	0	0	0	0	0	0	0	0	0	0	0	0	0	0	0	0	0	1	0	0	0	0	0	0	0	0	0	0	0	0	0	0	0	0	0	0	0	0	0	0	0	0	0
I	4716469	4716470	0	0	0	0	0	0	0	0	0	0	0	0	1	0	0	0	0	0	0	0	0	0	0	0	0	0	0	0	0	0	0	0	0	0	0	0	0	0	0	0	0	0	0	0	0	0	0
I	4773224	4773229	0	0	0	0	0	0	0	0	0	0	0	0	0	0	1	0	0	0	0	0	0	0	0	0	0	0	0	0	0	0	0	0	0	0	0	0	0	0	0	0	0	0	0	0	0	0	0
I	4773247	4773252	0	0	0	0	0	0	1	0	0	0	0	0	0	0	0	0	0	0	0	0	0	0	0	0	0	0	0	0	0	0	0	0	0	0	0	0	0	0	0	0	0	0	0	0	0	0	0
I	4782300	4782305	0	0	0	0	0	0	0	0	0	0	0	0	0	0	0	0	0	0	0	0	0	0	0	0	0	0	0	0	0	0	0	0	0	1	0	0	0	0	0	0	0	0	0	0	0	0	0
I	4782326	4782332	0	0	0	0	0	0	0	0	0	0	0	0	0	0	0	0	0	0	0	0	0	0	0	0	0	0	0	0	0	0	0	0	0	0	0	0	0	0	0	0	0	0	0	0	0	0	0
I	4782921	4782922	0	0	0	0	0	0	0	0	0	0	0	0	0	0	0	0	0	0	0	0	0	0	0	0	0	0	0	0	0	0	0	0	0	0	0	0	0	0	0	0	0	0	0	0	0	0	0
I	4787180	4787181	0	0	0	0	0	0	0	0	0	0	0	0	1	0	0	0	0	0	0	0	0	0	0	0	0	0	0	0	0	0	0	0	0	0	0	0	0	0	0	0	0	0	0	0	0	0	0
I	4807410	4807415	0	0	0	0	0	0	0	0	0	0	0	0	0	0	0	0	0	0	0	0	0	0	0	0	0	0	0	0	0	0	0	0	0	0	0	0	0	0	0	0	0	0	0	0	1	0	0
I	4807442	4807447	0	0	0	0	0	0	0	0	0	0	0	0	0	0	0	0	0	0	0	0	0	0	0	0	0	0	0	0	0	0	0	0	0	0	0	0	0	0	0	0	0	0	0	0	0	0	0
I	4824880	4824881	0	1	0	0	0	0	0	0	0	0	0	0	0	0	0	0	0	0	0	0	0	0	0	0	0	0	0	0	0	0	0	0	0	0	0	0	0	0	0	0	0	0	0	0	0	0	0
I	4836023	4836024	0	0	0	0	0	0	0	0	0	0	0	0	0	0	0	0	0	0	0	0	0	0	0	0	0	1	0	0	0	0	0	0	0	0	0	0	0	0	0	0	0	0	0	0	0	0	0
I	4863598	4863599	0	0	0	0	0	0	0	0	0	0	0	0	0	0	0	0	1	0	0	0	0	0	0	0	0	0	0	0	0	0	0	0	0	0	0	0	0	0	0	0	0	0	0	0	0	0	0
I	4882711	4882712	0	0	0	0	0	0	0	0	0	0	0	0	0	0	0	0	0	0	0	1	0	0	0	0	0	0	0	0	0	0	0	0	0	0	0	0	0	0	0	0	0	0	0	0	0	0	0
I	4901461	4901462	0	0	0	0	0	0	0	0	0	0	0	0	0	0	0	0	0	0	0	0	0	0	0	0	0	0	0	0	0	0	0	0	0	0	0	0	0	0	0	0	1	0	0	0	0	0	0
I	4904327	4904328	0	0	0	0	0	1	0	0	0	0	0	0	0	0	0	0	0	0	0	0	0	0	0	0	0	0	0	0	0	0	0	0	0	0	0	0	0	0	0	0	0	0	0	0	0	0	0
I	4916046	4916051	0	0	0	0	0	0	0	0	0	0	0	0	1	0	0	0	0	0	0	0	0	0	0	0	0	0	0	0	0	0	0	0	0	0	0	0	0	0	0	0	0	0	0	0	0	0	0
I	4939183	4939184	0	0	0	0	0	0	0	0	0	0	0	0	0	0	0	0	0	0	0	0	0	0	0	0	0	0	0	0	0	0	0	0	0	0	0	0	0	0	0	0	0	0	0	0	0	0	0
I	4958407	4958408	0	0	0	0	0	0	0	0	0	0	0	0	0	0	0	0	0	0	0	0	0	0	0	0	0	0	0	0	0	0	0	0	0	0	0	0	0	0	0	0	0	1	0	0	0	0	0
I	4961691	4961692	0	0	0	0	0	0	0	0	0	1	0	0	0	0	0	0	0	0	0	0	0	0	0	0	0	0	0	0	0	0	0	0	0	0	0	0	0	0	0	0	0	0	0	0	0	0	0
I	4991041	4991042	0	1	0	0	0	0	0	0	0	0	0	0	0	0	0	0	0	0	0	0	0	0	0	0	0	0	0	0	0	0	0	0	0	0	0	0	0	0	0	0	0	0	0	0	0	0	0
I	5044804	5044805	0	0	0	0	0	0	0	0	0	1	0	0	0	0	0	0	0	0	0	0	0	0	0	0	0	0	0	0	0	0	0	0	0	0	0	0	0	0	0	0	0	0	0	0	0	0	0
I	5049058	5049059	0	0	0	0	0	0	0	0	0	0	0	0	0	0	0	0	0	0	0	0	0	0	0	0	0	0	0	0	0	0	0	0	0	0	0	0	0	0	0	0	0	0	0	0	0	0	1
I	5066256	5066257	0	0	0	0	0	0	1	0	0	0	0	0	0	0	0	0	0	0	0	0	0	0	0	0	0	0	0	0	0	0	0	0	0	0	0	0	0	0	0	0	0	0	0	0	0	0	0
I	5073972	5073977	0	0	0	0	0	0	0	0	0	0	0	0	0	0	0	0	0	0	0	0	0	0	0	0	0	0	0	0	0	0	0	0	0	0	0	0	0	0	0	0	0	0	0	0	0	0	0
I	5074015	5074021	0	0	0	0	0	0	1	0	0	0	0	0	0	0	0	0	0	0	0	0	0	0	0	0	0	0	0	0	0	0	0	0	0	0	0	0	0	0	0	0	0	0	0	0	0	0	0
I	5106377	5106381	0	0	0	0	0	0	0	0	0	0	0	0	0	0	0	0	0	0	0	0	0	0	0	0	0	0	0	0	0	0	0	0	0	0	0	0	0	0	0	0	0	0	0	0	0	0	0
I	5106522	5106532	0	0	0	0	0	0	0	0	0	0	0	0	0	0	0	0	0	0	0	0	0	0	0	0	0	0	0	0	0	0	0	0	0	0	0	0	0	0	0	0	1	0	0	0	0	0	0
I	5116839	5116844	0	0	0	0	0	1	0	0	0	0	0	0	0	0	0	0	0	0	0	0	0	0	0	0	0	0	0	0	0	0	0	0	0	0	0	0	0	0	0	0	0	0	0	0	0	0	0
I	5116845	5116857	0	0	0	0	0	0	0	0	0	0	0	0	0	0	0	0	0	0	0	1	0	0	0	0	0	0	0	0	0	0	0	0	0	0	0	0	0	0	0	0	0	0	0	0	0	0	0
I	5116907	5116915	0	0	0	0	0	0	0	0	0	0	0	0	0	0	0	0	0	0	0	0	0	0	0	0	0	0	0	0	0	0	0	0	0	0	0	0	0	0	0	0	0	0	0	0	0	0	1
I	5138721	5138722	1	0	0	0	0	0	0	0	0	0	0	0	0	0	0	0	0	0	0	0	0	0	0	0	0	0	0	0	0	0	0	0	0	0	0	0	0	0	0	0	0	0	0	0	0	0	0
I	5155892	5155897	0	0	0	0	0	0	0	0	0	0	0	0	0	0	0	0	0	0	0	0	0	0	0	0	0	0	0	0	0	0	0	0	0	0	0	0	0	0	0	0	0	0	0	1	0	0	0
I	5155926	5155930	0	0	0	0	0	0	0	0	0	0	0	0	1	0	0	0	0	0	0	0	0	0	0	0	0	0	0	0	0	0	0	0	0	0	0	0	0	0	0	0	0	0	0	0	0	0	0
I	5159316	5159317	0	0	0	0	0	0	0	0	0	0	0	0	0	0	0	0	0	0	0	0	0	0	0	0	0	1	0	0	0	0	0	0	0	0	0	0	0	0	0	0	0	0	0	0	0	0	0
I	5167132	5167133	0	0	0	0	0	0	0	0	0	0	0	0	1	0	0	0	0	0	0	0	0	0	0	0	0	0	0	0	0	0	0	0	0	0	0	0	0	0	0	0	0	0	0	0	0	0	0
I	5172288	5172289	0	0	0	0	1	0	0	0	0	0	0	0	0	0	0	0	0	0	0	0	0	0	0	0	0	0	0	0	0	0	0	0	0	0	0	0	0	0	0	0	0	0	0	0	0	0	0
I	5181266	5181267	0	0	0	0	0	0	0	0	0	0	0	0	0	0	0	0	0	0	0	0	0	0	0	0	0	0	0	0	0	0	0	0	0	0	0	0	0	0	0	0	0	0	0	0	0	0	0
I	5201357	5201358	0	0	0	0	0	0	0	0	0	0	0	0	0	0	0	0	0	0	0	0	0	0	0	0	0	0	0	0	0	0	0	0	0	0	0	0	0	0	0	0	0	0	0	1	0	0	0
I	5208575	5208576	0	0	0	0	0	0	0	0	0	0	0	0	0	0	0	0	0	0	0	0	0	0	0	0	0	0	0	0	0	0	0	0	0	0	0	0	0	0	0	0	0	0	0	0	0	0	1
I	5233995	5233996	0	0	0	0	0	0	0	0	0	0	0	0	0	0	0	0	0	0	0	0	0	0	0	0	0	0	0	0	0	0	0	0	0	0	0	0	0	0	0	0	1	0	0	0	0	0	0
I	5240374	5240375	0	0	0	0	0	0	0	0	0	0	0	0	0	0	0	0	0	0	0	0	0	0	0	0	0	0	0	0	0	0	0	0	0	0	0	0	0	0	0	0	0	0	0	0	0	0	0
I	5247639	5247640	0	0	0	0	0	1	0	0	0	0	0	0	0	0	0	0	0	0	0	0	0	0	0	0	0	0	0	0	0	0	0	0	0	0	0	0	0	0	0	0	0	0	0	0	0	0	0
I	5271128	5271129	0	0	0	0	1	0	0	0	0	0	0	0	0	0	0	0	0	0	0	0	0	0	0	0	0	0	0	0	0	0	0	0	0	0	0	0	0	0	0	0	0	0	0	0	0	0	0
I	5321466	5321467	0	0	0	0	0	0	0	0	0	0	0	0	0	0	0	0	0	0	0	0	0	0	0	0	0	0	0	0	0	0	0	0	0	0	0	0	0	0	0	0	0	0	0	1	0	0	0
I	5426574	5426575	0	0	0	0	0	0	0	0	0	0	0	0	0	0	0	0	0	0	0	0	0	0	0	0	0	0	0	1	0	0	0	0	0	0	0	0	0	0	0	0	0	0	0	0	0	0	0
I	5437432	5437433	0	0	0	0	0	0	0	0	0	0	0	0	0	0	0	0	1	0	0	0	0	0	0	0	0	0	0	0	0	0	0	0	0	0	0	0	0	0	0	0	0	0	0	0	0	0	0
I	5441983	5441984	0	0	0	0	0	0	0	0	0	0	0	0	0	0	1	0	0	0	0	0	0	0	0	0	0	0	0	0	0	0	0	0	0	0	0	0	0	0	0	0	0	0	0	0	0	0	0
I	5444379	5444380	0	0	0	0	0	0	0	0	0	1	0	0	0	0	0	0	0	0	0	0	0	0	0	0	0	0	0	0	0	0	0	0	0	0	0	0	0	0	0	0	0	0	0	0	0	0	0
I	5452106	5452107	0	0	0	0	0	0	0	0	0	0	0	0	0	0	0	0	0	0	0	0	0	0	0	0	0	0	0	0	0	0	0	0	0	0	0	0	0	0	0	0	0	0	0	0	0	0	0
I	5466020	5466021	0	0	0	0	0	0	0	0	0	0	0	0	0	0	0	0	0	0	0	0	0	0	0	0	0	0	0	0	0	0	0	0	0	0	0	0	0	0	0	0	1	0	0	0	0	0	0
I	5470391	5470392	1	0	0	0	0	0	0	0	0	0	0	0	0	0	0	0	0	0	0	0	0	0	0	0	0	0	0	0	0	0	0	0	0	0	0	0	0	0	0	0	0	0	0	0	0	0	0
I	5504006	5504007	0	0	0	0	0	0	0	0	0	0	0	0	0	0	1	0	0	0	0	0	0	0	0	0	0	0	0	0	0	0	0	0	0	0	0	0	0	0	0	0	0	0	0	0	0	0	0
I	5504888	5504889	0	0	0	1	0	0	0	0	0	0	0	0	0	0	0	0	0	0	0	0	0	0	0	0	0	0	0	0	0	0	0	0	0	0	0	0	0	0	0	0	0	0	0	0	0	0	0
I	5506096	5506097	0	0	0	0	0	0	0	0	0	0	0	0	0	0	0	0	0	0	0	0	0	0	0	0	0	0	0	0	0	0	0	0	0	0	0	0	0	0	0	0	0	1	0	0	0	0	0
I	5527580	5527581	0	0	0	0	0	0	0	0	0	0	0	0	0	0	0	0	0	0	1	0	0	0	0	0	0	0	0	0	0	0	0	0	0	0	0	0	0	0	0	0	0	0	0	0	0	0	0
I	5543277	5543278	0	0	0	0	0	0	0	0	0	0	0	0	0	0	0	0	0	0	0	0	0	0	0	1	0	0	0	0	0	0	0	0	0	0	0	0	0	0	0	0	0	0	0	0	0	0	0
II	43769	43770	0	0	0	0	0	0	0	0	0	0	0	0	0	0	0	0	1	0	0	0	0	0	0	0	0	0	0	0	0	0	0	0	0	0	0	0	0	0	0	0	0	0	0	0	0	0	0
II	127613	127614	0	0	0	0	0	0	0	0	0	0	0	0	0	0	0	1	0	0	0	0	0	0	0	0	0	0	0	0	0	0	0	0	0	0	0	0	0	0	0	0	0	0	0	0	0	0	0
II	147744	147745	0	0	0	0	0	0	0	0	0	0	0	0	0	0	1	0	0	0	0	0	0	0	0	0	0	0	0	0	0	0	0	0	0	0	0	0	0	0	0	0	0	0	0	0	0	0	0
II	153151	153152	0	0	0	0	1	0	0	0	0	0	0	0	0	0	0	0	0	0	0	0	0	0	0	0	0	0	0	0	0	0	0	0	0	0	0	0	0	0	0	0	0	0	0	0	0	0	0
II	163596	163597	0	0	0	0	0	0	0	0	0	0	0	0	0	0	0	0	0	0	0	0	0	0	0	0	0	0	0	1	0	0	0	0	0	0	0	0	0	0	0	0	0	0	0	0	0	0	0
II	166524	166525	0	0	0	0	0	0	0	0	0	0	0	0	0	0	0	0	0	0	0	0	0	0	0	0	0	0	0	1	0	0	0	0	0	0	0	0	0	0	0	0	0	0	0	0	0	0	0
II	166741	166742	0	0	0	0	0	0	0	0	0	0	0	0	0	0	0	0	0	0	0	0	0	0	0	0	0	0	1	0	0	0	0	0	0	0	0	0	0	0	0	0	0	0	0	0	0	0	0
II	174476	174477	0	0	0	0	0	0	0	0	0	0	0	0	0	0	0	0	0	0	0	0	0	0	0	0	0	0	0	0	0	0	0	0	0	0	0	0	0	0	0	0	0	0	0	0	0	0	0
II	197245	197250	0	0	0	0	0	0	0	0	0	0	0	0	0	0	0	0	0	0	0	0	0	0	0	0	0	0	0	0	0	0	0	0	0	0	0	0	0	0	0	0	0	0	0	1	0	0	0
II	197282	197288	0	0	0	0	0	0	0	0	0	0	0	0	0	0	0	0	0	0	0	0	0	0	0	0	0	0	0	0	0	0	0	0	0	0	0	0	0	0	0	0	0	0	0	0	0	0	0
II	204253	204254	0	0	0	0	0	0	0	0	0	0	0	0	0	0	0	0	0	0	0	0	0	0	0	0	0	0	0	0	0	0	0	0	0	0	0	0	0	0	0	0	0	0	0	0	0	0	0
II	205337	205338	0	0	0	0	0	0	0	0	0	0	0	0	0	0	0	0	0	0	0	0	0	0	0	0	0	0	0	0	0	0	0	0	0	0	0	0	0	0	0	0	0	0	0	0	0	0	0
II	206482	206490	0	0	0	0	0	0	0	0	0	0	0	0	0	0	0	0	0	0	0	0	0	0	0	0	0	0	0	0	0	0	0	0	0	0	0	0	0	0	0	0	0	0	0	0	0	0	0
II	289288	289289	0	0	0	0	0	0	0	0	0	0	0	0	0	0	0	0	0	0	0	0	0	0	0	0	0	0	0	0	0	0	0	0	0	1	0	0	0	0	0	0	0	0	0	0	0	0	0
II	344476	344482	0	0	0	0	0	1	0	0	0	0	0	0	0	0	0	0	0	0	0	0	0	0	0	0	0	0	0	0	0	0	0	0	0	0	0	0	0	0	0	0	0	0	0	0	0	0	0
II	344541	344551	0	0	0	0	0	0	0	0	0	0	0	0	0	0	0	0	0	1	0	0	0	0	0	0	0	0	0	0	0	0	0	0	0	0	0	0	0	0	0	0	0	0	0	0	0	0	0
II	354972	354978	0	0	0	0	0	0	0	0	0	0	0	0	0	0	0	1	0	0	0	0	0	0	0	0	0	0	0	0	0	0	0	0	0	0	0	0	0	0	0	0	0	0	0	0	0	0	0
II	355102	355107	0	0	0	0	0	0	0	0	0	0	0	0	0	0	0	0	0	0	0	0	0	0	0	0	0	0	0	0	0	0	0	0	0	0	0	0	0	0	0	0	0	0	0	1	0	0	0
II	387436	387442	0	0	0	0	0	0	0	0	0	0	0	0	0	0	0	0	0	0	0	0	0	0	0	0	0	0	0	0	0	0	0	0	0	0	0	0	0	0	0	0	0	0	0	0	0	0	1
II	387586	387591	0	0	0	0	0	0	0	0	0	0	0	0	0	0	0	0	0	0	0	0	0	0	0	0	0	0	0	0	0	0	0	0	0	0	0	0	0	0	0	0	1	0	0	0	0	0	0
II	396055	396056	0	0	0	0	0	0	0	0	0	0	0	0	1	0	0	0	0	0	0	0	0	0	0	0	0	0	0	0	0	0	0	0	0	0	0	0	0	0	0	0	0	0	0	0	0	0	0
II	413381	413382	0	0	0	0	0	0	0	0	0	0	0	0	0	0	0	0	0	0	0	0	0	0	0	0	0	0	0	0	0	0	0	0	0	0	0	0	0	0	0	0	0	1	0	0	0	0	0
II	447219	447220	0	0	0	0	0	0	0	0	0	0	0	0	0	0	0	0	0	0	0	0	0	0	0	0	0	0	0	0	0	0	0	0	0	0	0	0	0	0	0	0	0	0	0	0	0	0	0
II	467742	467743	0	0	0	0	0	0	0	0	0	0	0	0	1	0	0	0	0	0	0	0	0	0	0	0	0	0	0	0	0	0	0	0	0	0	0	0	0	0	0	0	0	0	0	0	0	0	0
II	477149	477150	0	0	0	0	0	1	0	0	0	0	0	0	0	0	0	0	0	0	0	0	0	0	0	0	0	0	0	0	0	0	0	0	0	0	0	0	0	0	0	0	0	0	0	0	0	0	0
II	494312	494313	0	0	0	0	0	0	1	0	0	0	0	0	0	0	0	0	0	0	0	0	0	0	0	0	0	0	0	0	0	0	0	0	0	0	0	0	0	0	0	0	0	0	0	0	0	0	0
II	500966	500973	0	1	0	0	0	0	0	0	0	0	0	0	0	0	0	0	0	0	0	0	0	0	0	0	0	0	0	0	0	0	0	0	0	0	0	0	0	0	0	0	0	0	0	0	0	0	0
II	500987	500996	0	0	0	0	0	0	0	0	0	0	0	0	0	0	0	0	0	0	0	0	0	0	0	0	0	0	0	0	0	0	0	0	0	0	0	0	0	0	0	0	0	0	0	0	0	0	0
II	555662	555663	0	0	0	0	0	0	0	0	0	0	0	0	0	0	0	0	0	0	0	0	0	0	0	0	0	0	0	0	0	0	0	0	0	0	0	0	0	0	0	0	0	0	0	0	0	0	0
II	570707	570708	0	0	0	0	0	0	0	0	0	0	0	0	0	0	0	0	0	0	0	0	0	0	0	0	0	0	0	0	0	0	0	0	0	0	0	0	0	0	0	0	0	0	0	0	0	0	0
II	576237	576238	0	0	0	0	0	0	0	0	0	0	0	0	0	0	0	0	0	0	0	0	0	0	0	0	0	0	0	0	0	0	0	0	0	0	0	0	0	0	0	0	0	0	0	0	0	0	0
II	580378	580379	0	0	0	0	0	0	0	0	0	0	0	0	0	0	0	0	0	0	0	0	0	0	0	0	0	0	0	0	0	0	0	0	0	0	0	0	0	0	0	0	0	0	0	0	0	0	0
II	592758	592759	0	0	0	0	0	0	0	0	0	0	0	0	0	0	0	0	0	0	0	0	0	0	0	0	0	0	0	0	0	0	0	0	0	0	0	0	0	0	0	0	0	0	0	0	0	0	0
II	593313	593314	0	0	1	0	0	0	0	0	0	0	0	0	0	0	0	0	0	0	0	0	0	0	0	0	0	0	0	0	0	0	0	0	0	0	0	0	0	0	0	0	0	0	0	0	0	0	0
II	624278	624279	0	0	0	0	0	1	0	0	0	0	0	0	0	0	0	0	0	0	0	0	0	0	0	0	0	0	0	0	0	0	0	0	0	0	0	0	0	0	0	0	0	0	0	0	0	0	0
II	632794	632795	0	0	0	0	0	0	0	0	0	0	0	0	1	0	0	0	0	0	0	0	0	0	0	0	0	0	0	0	0	0	0	0	0	0	0	0	0	0	0	0	0	0	0	0	0	0	0
II	635966	635967	0	0	0	0	0	0	0	0	0	0	0	0	0	0	0	0	1	0	0	0	0	0	0	0	0	0	0	0	0	0	0	0	0	0	0	0	0	0	0	0	0	0	0	0	0	0	0
II	644075	644076	0	0	0	0	0	0	0	0	0	0	0	0	0	0	0	0	0	0	0	0	0	0	0	0	0	0	0	1	0	0	0	0	0	0	0	0	0	0	0	0	0	0	0	0	0	0	0
II	655834	655835	0	0	0	0	0	0	0	0	0	0	0	0	1	0	0	0	0	0	0	0	0	0	0	0	0	0	0	0	0	0	0	0	0	0	0	0	0	0	0	0	0	0	0	0	0	0	0
II	719294	719295	0	0	0	0	0	0	1	0	0	0	0	0	0	0	0	0	0	0	0	0	0	0	0	0	0	0	0	0	0	0	0	0	0	0	0	0	0	0	0	0	0	0	0	0	0	0	0
II	780365	780366	0	0	0	0	0	0	0	0	0	0	0	0	0	0	0	0	0	0	0	0	0	0	0	0	0	0	0	0	0	0	0	0	0	0	0	0	0	0	0	0	0	0	0	0	0	0	1
II	790324	790325	0	0	0	0	1	0	0	0	0	0	0	0	0	0	0	0	0	0	0	0	0	0	0	0	0	0	0	0	0	0	0	0	0	0	0	0	0	0	0	0	0	0	0	0	0	0	0
II	813765	813766	0	0	0	0	0	0	0	0	0	0	0	0	0	0	0	0	1	0	0	0	0	0	0	0	0	0	0	0	0	0	0	0	0	0	0	0	0	0	0	0	0	0	0	0	0	0	0
II	845718	845719	0	0	0	0	0	0	0	0	0	0	0	0	0	0	0	0	0	0	0	0	0	0	0	1	0	0	0	0	0	0	0	0	0	0	0	0	0	0	0	0	0	0	0	0	0	0	0
II	862582	862583	0	0	0	0	0	0	0	0	0	0	0	0	0	0	0	0	0	0	0	0	0	0	0	0	0	0	0	0	0	0	0	0	0	0	0	0	0	0	0	0	0	0	0	0	0	0	0
II	870389	870390	0	0	0	0	0	0	0	0	0	0	0	0	0	0	0	0	0	0	0	0	0	0	0	0	0	0	0	0	0	0	0	0	0	0	0	0	0	0	0	0	0	0	0	0	0	0	0
II	882146	882147	0	0	0	0	0	0	0	0	0	0	0	0	0	0	0	0	0	0	0	0	0	0	0	0	0	0	0	0	0	0	0	0	0	0	0	0	0	0	0	0	1	0	0	0	0	0	0
II	897248	897249	0	0	0	0	0	0	0	0	0	0	0	0	0	0	0	0	0	0	1	0	0	0	0	0	0	0	0	0	0	0	0	0	0	0	0	0	0	0	0	0	0	0	0	0	0	0	0
II	897490	897491	0	0	0	0	0	0	0	0	0	0	0	0	1	0	0	0	0	0	0	0	0	0	0	0	0	0	0	0	0	0	0	0	0	0	0	0	0	0	0	0	0	0	0	0	0	0	0
II	901624	901625	0	0	0	0	0	0	0	0	0	0	0	0	0	0	0	0	0	0	1	0	0	0	0	0	0	0	0	0	0	0	0	0	0	0	0	0	0	0	0	0	0	0	0	0	0	0	0
II	976910	976911	0	0	0	0	0	1	0	0	0	0	0	0	0	0	0	0	0	0	0	0	0	0	0	0	0	0	0	0	0	0	0	0	0	0	0	0	0	0	0	0	0	0	0	0	0	0	0
II	996495	996496	0	0	0	0	0	1	0	0	0	0	0	0	0	0	0	0	0	0	0	0	0	0	0	0	0	0	0	0	0	0	0	0	0	0	0	0	0	0	0	0	0	0	0	0	0	0	0
II	1032196	1032197	0	0	0	0	0	0	0	0	0	0	0	0	1	0	0	0	0	0	0	0	0	0	0	0	0	0	0	0	0	0	0	0	0	0	0	0	0	0	0	0	0	0	0	0	0	0	0
II	1139713	1139714	0	0	0	0	0	0	0	0	0	0	0	0	0	0	0	0	0	0	0	0	0	0	0	0	0	0	0	0	0	0	0	0	0	0	0	0	0	0	0	0	0	0	0	0	0	0	0
II	1199521	1199522	0	0	0	0	0	0	0	0	0	0	0	0	0	0	0	0	0	0	0	0	0	0	0	0	0	0	0	0	0	0	0	0	0	0	0	0	0	0	0	0	0	0	0	0	0	0	0
II	1212501	1212502	0	0	0	0	0	0	1	0	0	0	0	0	0	0	0	0	0	0	0	0	0	0	0	0	0	0	0	0	0	0	0	0	0	0	0	0	0	0	0	0	0	0	0	0	0	0	0
II	1223418	1223427	0	0	0	0	0	0	0	0	0	0	0	0	0	0	0	0	0	0	0	0	0	0	0	0	0	0	0	0	0	0	0	0	0	0	0	0	0	0	0	0	0	0	1	0	0	0	0
II	1223420	1223427	0	0	0	0	0	1	0	0	0	0	0	0	0	0	0	0	0	0	0	0	0	0	0	0	0	0	0	0	0	0	0	0	0	0	0	0	0	0	0	0	0	0	0	0	0	0	0
II	1239337	1239338	0	0	0	0	0	0	0	0	0	0	0	0	1	0	0	0	0	0	0	0	0	0	0	0	0	0	0	0	0	0	0	0	0	0	0	0	0	0	0	0	0	0	0	0	0	0	0
II	1265477	1265478	0	0	0	0	0	0	0	0	0	0	0	0	0	0	0	0	0	0	0	0	0	0	0	0	0	0	0	0	0	0	0	0	0	0	0	0	0	0	0	0	0	0	0	1	0	0	0
II	1265912	1265913	0	0	0	0	0	0	0	0	0	0	0	0	0	0	0	0	0	0	0	0	0	0	0	0	0	0	0	0	0	0	0	0	0	1	0	0	0	0	0	0	0	0	0	0	0	0	0
II	1278210	1278211	0	0	0	0	0	0	0	0	0	0	0	0	0	0	0	1	0	0	0	0	0	0	0	0	0	0	0	0	0	0	0	0	0	0	0	0	0	0	0	0	0	0	0	0	0	0	0
II	1297707	1297708	0	0	0	0	0	0	0	0	0	0	0	0	0	0	0	0	0	0	0	0	0	0	0	0	0	0	0	0	0	0	0	0	0	0	0	1	0	0	0	0	0	0	0	0	0	0	0
II	1301590	1301591	0	0	1	0	0	0	0	0	0	0	0	0	0	0	0	0	0	0	0	0	0	0	0	0	0	0	0	0	0	0	0	0	0	0	0	0	0	0	0	0	0	0	0	0	0	0	0
II	1306371	1306372	0	0	0	0	0	0	0	0	0	0	0	0	0	0	0	0	0	0	0	0	0	0	0	0	0	0	0	0	0	0	0	0	0	0	0	0	0	0	0	0	0	0	0	0	0	0	1
II	1343137	1343138	0	0	0	0	0	0	0	0	0	0	0	0	0	0	0	0	0	0	0	0	0	0	0	0	0	0	0	0	0	0	0	0	0	0	0	0	0	0	0	0	0	0	0	1	0	0	0
II	1344377	1344378	0	0	0	0	0	0	0	0	0	0	0	0	0	0	0	0	0	0	0	0	0	0	0	0	0	0	0	0	0	0	0	0	0	0	0	1	0	0	0	0	0	0	0	0	0	0	0
II	1358469	1358470	0	0	0	0	0	0	0	0	0	0	0	0	0	0	0	0	0	0	0	0	0	0	0	0	1	0	0	0	0	0	0	0	0	0	0	0	0	0	0	0	0	0	0	0	0	0	0
II	1424029	1424030	0	0	0	0	0	0	0	0	0	0	0	0	0	0	0	0	0	0	0	0	0	0	0	1	0	0	0	0	0	0	0	0	0	0	0	0	0	0	0	0	0	0	0	0	0	0	0
II	1436072	1436077	0	0	0	0	0	0	0	0	0	0	0	0	0	0	0	0	0	0	0	0	0	0	0	0	0	0	0	0	0	0	0	0	0	0	0	0	0	0	0	0	1	0	0	0	0	0	0
II	1437907	1437908	0	0	0	0	0	0	0	0	0	0	0	0	0	0	0	0	0	0	0	0	0	0	0	0	0	0	0	0	0	0	0	0	0	0	0	1	0	0	0	0	0	0	0	0	0	0	0
II	1443153	1443154	0	0	0	0	0	0	0	0	0	0	0	0	0	0	1	0	0	0	0	0	0	0	0	0	0	0	0	0	0	0	0	0	0	0	0	0	0	0	0	0	0	0	0	0	0	0	0
II	1504982	1504983	0	0	0	0	0	0	0	0	0	0	0	0	1	0	0	0	0	0	0	0	0	0	0	0	0	0	0	0	0	0	0	0	0	0	0	0	0	0	0	0	0	0	0	0	0	0	0
II	1527603	1527604	0	0	0	0	0	1	0	0	0	0	0	0	0	0	0	0	0	0	0	0	0	0	0	0	0	0	0	0	0	0	0	0	0	0	0	0	0	0	0	0	0	0	0	0	0	0	0
II	1531711	1531712	0	0	0	0	0	0	0	0	0	0	0	0	1	0	0	0	0	0	0	0	0	0	0	0	0	0	0	0	0	0	0	0	0	0	0	0	0	0	0	0	0	0	0	0	0	0	0
II	1546029	1546030	0	0	0	0	0	1	0	0	0	0	0	0	0	0	0	0	0	0	0	0	0	0	0	0	0	0	0	0	0	0	0	0	0	0	0	0	0	0	0	0	0	0	0	0	0	0	0
II	1549911	1549912	0	0	0	0	0	0	0	0	0	1	0	0	0	0	0	0	0	0	0	0	0	0	0	0	0	0	0	0	0	0	0	0	0	0	0	0	0	0	0	0	0	0	0	0	0	0	0
II	1557314	1557320	0	0	0	0	0	0	0	0	0	0	0	0	0	0	0	0	0	0	0	0	0	0	0	0	0	0	0	0	0	0	0	0	0	0	0	0	0	0	0	0	0	0	0	0	0	0	0
II	1557341	1557353	0	0	0	0	0	0	0	0	0	0	0	0	0	0	0	0	0	0	0	0	0	0	0	0	0	0	0	0	0	0	0	0	0	0	0	0	0	0	0	0	0	0	0	1	0	0	0
II	1557376	1557384	0	0	0	0	1	0	0	0	0	0	0	0	0	0	0	0	0	0	0	0	0	0	0	0	0	0	0	0	0	0	0	0	0	0	0	0	0	0	0	0	0	0	0	0	0	0	0
II	1575968	1575976	0	0	0	0	0	0	0	0	0	0	0	0	0	0	0	0	0	1	0	0	0	0	0	0	0	0	0	0	0	0	0	0	0	0	0	0	0	0	0	0	0	0	0	0	0	0	0
II	1575996	1576002	0	0	0	0	0	0	0	0	0	0	0	0	0	0	0	0	0	0	0	0	0	0	0	0	0	0	0	0	0	0	0	0	0	0	0	0	0	0	0	0	0	0	0	0	0	0	0
II	1576005	1576011	0	0	0	0	0	0	0	0	0	0	0	0	0	0	0	0	0	0	0	0	0	0	0	0	1	0	0	0	0	0	0	0	0	0	0	0	0	0	0	0	0	0	0	0	0	0	0
II	1588507	1588508	0	0	0	0	0	0	0	0	0	0	0	0	0	0	0	0	0	0	0	0	0	0	0	0	0	0	0	0	0	0	0	0	0	0	0	0	0	0	0	0	0	0	0	0	0	0	0
II	1650716	1650717	0	0	0	0	0	0	0	0	0	0	0	0	1	0	0	0	0	0	0	0	0	0	0	0	0	0	0	0	0	0	0	0	0	0	0	0	0	0	0	0	0	0	0	0	0	0	0
II	1680737	1680738	0	0	0	0	0	0	0	0	0	0	0	0	0	0	0	0	0	0	0	0	0	0	0	0	0	0	0	0	0	0	0	0	0	0	0	0	0	0	0	0	0	0	0	1	0	0	0
II	1726543	1726544	0	0	0	0	0	1	0	0	0	0	0	0	0	0	0	0	0	0	0	0	0	0	0	0	0	0	0	0	0	0	0	0	0	0	0	0	0	0	0	0	0	0	0	0	0	0	0
II	1749725	1749726	0	0	0	0	0	0	0	0	0	0	0	0	0	0	0	0	0	0	0	0	0	0	0	0	0	0	0	0	0	0	0	0	0	0	0	0	0	0	0	0	0	0	0	0	0	0	0
II	1772916	1772917	0	0	0	0	0	0	0	0	0	0	0	0	0	0	0	0	0	0	0	0	0	0	0	0	0	0	0	0	0	0	0	0	0	0	0	0	0	0	0	0	0	0	0	0	0	0	1
II	1777885	1777893	0	0	0	0	0	0	0	0	0	0	0	0	0	0	0	0	0	0	0	0	0	0	0	0	0	0	0	0	0	0	0	0	0	0	0	0	0	0	0	0	0	0	0	0	0	0	0
II	1777925	1777935	0	0	0	0	0	0	0	0	0	0	0	0	0	0	0	0	0	0	0	0	0	0	0	0	0	0	0	0	0	0	0	0	0	0	0	0	0	0	0	0	0	0	0	0	0	0	0
II	1777962	1777967	0	0	0	0	0	0	0	0	0	0	0	0	0	0	0	0	0	0	0	0	0	0	0	0	0	0	0	0	0	0	0	0	0	0	0	0	0	0	0	0	0	0	0	0	0	0	0
II	1793823	1793824	0	0	0	0	0	0	0	0	0	0	0	0	0	0	0	0	0	0	0	0	0	0	0	0	0	0	0	0	0	0	0	0	0	0	0	0	0	0	0	0	0	0	0	0	1	0	0
II	1793823	1793824	1	0	0	0	0	0	0	0	0	0	0	0	0	0	0	0	0	0	0	0	0	0	0	0	0	0	0	0	0	0	0	0	0	0	0	0	0	0	0	0	0	0	0	0	0	0	0
II	1801484	1801485	0	0	0	0	0	0	0	0	0	0	0	0	1	0	0	0	0	0	0	0	0	0	0	0	0	0	0	0	0	0	0	0	0	0	0	0	0	0	0	0	0	0	0	0	0	0	0
II	1803384	1803385	0	0	0	0	0	0	0	0	0	0	0	0	0	0	0	0	0	0	0	0	0	0	0	0	0	0	0	0	0	0	0	0	0	0	0	0	0	0	0	0	1	0	0	0	0	0	0
II	1810426	1810427	0	0	0	0	0	0	0	0	0	0	0	0	1	0	0	0	0	0	0	0	0	0	0	0	0	0	0	0	0	0	0	0	0	0	0	0	0	0	0	0	0	0	0	0	0	0	0
II	1905604	1905609	0	0	0	0	1	0	0	0	0	0	0	0	0	0	0	0	0	0	0	0	0	0	0	0	0	0	0	0	0	0	0	0	0	0	0	0	0	0	0	0	0	0	0	0	0	0	0
II	1917003	1917004	0	0	0	0	0	0	0	0	0	0	0	0	1	0	0	0	0	0	0	0	0	0	0	0	0	0	0	0	0	0	0	0	0	0	0	0	0	0	0	0	0	0	0	0	0	0	0
II	1940920	1940921	0	0	0	0	0	0	0	0	0	0	0	0	0	0	0	0	0	0	0	0	0	0	0	0	0	0	0	0	0	0	0	0	0	0	0	1	0	0	0	0	0	0	0	0	0	0	0
II	1952259	1952260	0	0	0	0	0	0	0	0	0	0	0	0	1	0	0	0	0	0	0	0	0	0	0	0	0	0	0	0	0	0	0	0	0	0	0	0	0	0	0	0	0	0	0	0	0	0	0
II	1993723	1993729	0	0	0	0	0	0	0	0	0	0	0	0	0	0	0	0	0	0	0	0	0	0	0	0	0	0	0	0	0	0	0	0	0	0	0	0	0	0	0	0	0	0	0	0	0	0	1
II	1993798	1993805	0	0	0	0	0	0	0	0	0	0	0	0	0	0	0	0	0	0	0	0	0	0	0	0	0	0	0	1	0	0	0	0	0	0	0	0	0	0	0	0	0	0	0	0	0	0	0
II	1993821	1993826	0	0	0	0	0	0	0	0	0	0	0	0	0	0	0	1	0	0	0	0	0	0	0	0	0	0	0	0	0	0	0	0	0	0	0	0	0	0	0	0	0	0	0	0	0	0	0
II	1999533	1999534	0	1	0	0	0	0	0	0	0	0	0	0	0	0	0	0	0	0	0	0	0	0	0	0	0	0	0	0	0	0	0	0	0	0	0	0	0	0	0	0	0	0	0	0	0	0	0
II	2003670	2003671	0	0	0	0	0	0	0	0	0	0	0	0	0	0	0	0	0	0	0	0	0	1	0	0	0	0	0	0	0	0	0	0	0	0	0	0	0	0	0	0	0	0	0	0	0	0	0
II	2005874	2005875	0	1	0	0	0	0	0	0	0	0	0	0	0	0	0	0	0	0	0	0	0	0	0	0	0	0	0	0	0	0	0	0	0	0	0	0	0	0	0	0	0	0	0	0	0	0	0
II	2008009	2008010	0	0	1	0	0	0	0	0	0	0	0	0	0	0	0	0	0	0	0	0	0	0	0	0	0	0	0	0	0	0	0	0	0	0	0	0	0	0	0	0	0	0	0	0	0	0	0
II	2068068	2068069	0	0	0	0	0	0	0	0	0	0	0	0	0	0	0	0	0	0	0	0	0	0	0	0	0	0	0	0	0	0	0	0	0	0	0	0	0	0	0	0	0	0	0	0	0	0	0
II	2092734	2092741	0	0	0	0	0	0	0	0	0	0	0	0	0	0	1	0	0	0	0	0	0	0	0	0	0	0	0	0	0	0	0	0	0	0	0	0	0	0	0	0	0	0	0	0	0	0	0
II	2092767	2092773	0	0	0	0	1	0	0	0	0	0	0	0	0	0	0	0	0	0	0	0	0	0	0	0	0	0	0	0	0	0	0	0	0	0	0	0	0	0	0	0	0	0	0	0	0	0	0
II	2095979	2095985	0	0	0	0	0	0	0	0	0	0	0	0	1	0	0	0	0	0	0	0	0	0	0	0	0	0	0	0	0	0	0	0	0	0	0	0	0	0	0	0	0	0	0	0	0	0	0
II	2096023	2096028	0	0	0	0	0	0	0	0	0	0	0	0	0	0	0	0	0	0	0	0	0	0	0	0	0	0	0	0	0	0	0	0	0	0	0	0	0	0	0	0	0	0	0	0	0	0	1
II	2100050	2100051	0	0	0	0	0	0	0	0	0	0	0	0	0	0	0	0	0	0	0	0	0	0	0	0	0	0	0	0	0	0	0	0	0	0	0	0	0	0	0	0	0	0	0	0	0	0	0
II	2156739	2156745	1	0	0	0	0	0	0	0	0	0	0	0	0	0	0	0	0	0	0	0	0	0	0	0	0	0	0	0	0	0	0	0	0	0	0	0	0	0	0	0	0	0	0	0	0	0	0
II	2156748	2156755	0	0	0	0	0	0	0	0	0	0	0	0	1	0	0	0	0	0	0	0	0	0	0	0	0	0	0	0	0	0	0	0	0	0	0	0	0	0	0	0	0	0	0	0	0	0	0
II	2157418	2157419	0	0	0	0	0	1	0	0	0	0	0	0	0	0	0	0	0	0	0	0	0	0	0	0	0	0	0	0	0	0	0	0	0	0	0	0	0	0	0	0	0	0	0	0	0	0	0
II	2180801	2180802	0	0	0	0	0	0	0	0	0	0	0	0	0	0	0	0	0	0	0	0	0	0	0	0	0	0	0	0	0	0	0	0	0	0	0	0	0	0	0	0	0	1	0	0	0	0	0
II	2189589	2189590	0	0	0	0	0	0	0	0	0	0	0	0	0	0	0	0	0	0	0	0	0	0	0	0	0	0	0	0	0	0	0	0	0	0	0	0	0	0	0	0	0	0	0	0	0	0	0
II	2235852	2235857	0	0	0	0	0	0	0	0	0	0	0	0	1	0	0	0	0	0	0	0	0	0	0	0	0	0	0	0	0	0	0	0	0	0	0	0	0	0	0	0	0	0	0	0	0	0	0
II	2258419	2258420	0	0	0	0	0	0	0	0	0	0	0	0	1	0	0	0	0	0	0	0	0	0	0	0	0	0	0	0	0	0	0	0	0	0	0	0	0	0	0	0	0	0	0	0	0	0	0
II	2267591	2267592	0	0	0	0	0	0	0	0	0	0	0	0	0	0	0	0	0	0	0	0	0	1	0	0	0	0	0	0	0	0	0	0	0	0	0	0	0	0	0	0	0	0	0	0	0	0	0
II	2290290	2290291	0	0	0	0	0	0	0	0	0	0	0	0	0	0	0	0	0	0	0	0	1	0	0	0	0	0	0	0	0	0	0	0	0	0	0	0	0	0	0	0	0	0	0	0	0	0	0
II	2338875	2338876	0	0	1	0	0	0	0	0	0	0	0	0	0	0	0	0	0	0	0	0	0	0	0	0	0	0	0	0	0	0	0	0	0	0	0	0	0	0	0	0	0	0	0	0	0	0	0
II	2385269	2385270	0	0	0	0	0	0	0	0	0	0	0	0	0	0	0	0	0	0	0	0	0	0	0	0	0	0	0	0	0	0	0	0	0	1	0	0	0	0	0	0	0	0	0	0	0	0	0
II	2392310	2392311	0	0	0	0	0	0	0	0	0	0	0	0	1	0	0	0	0	0	0	0	0	0	0	0	0	0	0	0	0	0	0	0	0	0	0	0	0	0	0	0	0	0	0	0	0	0	0
II	2416848	2416849	0	0	0	0	0	0	0	0	0	0	0	0	0	0	0	0	0	0	0	0	0	0	0	0	0	0	0	0	0	0	0	0	0	0	0	0	0	0	0	0	1	0	0	0	0	0	0
II	2422375	2422376	0	0	0	0	0	0	0	0	0	0	0	0	0	0	0	0	0	0	0	1	0	0	0	0	0	0	0	0	0	0	0	0	0	0	0	0	0	0	0	0	0	0	0	0	0	0	0
II	2475765	2475771	0	0	0	0	0	0	0	0	0	0	0	0	0	0	0	0	0	0	0	0	0	0	0	0	0	0	0	0	0	0	0	0	0	0	0	0	0	0	0	0	1	0	0	0	0	0	0
II	2475765	2475771	0	0	0	0	0	0	0	0	0	0	0	0	1	0	0	0	0	0	0	0	0	0	0	0	0	0	0	0	0	0	0	0	0	0	0	0	0	0	0	0	0	0	0	0	0	0	0
II	2475799	2475804	0	0	0	0	0	0	0	0	0	0	0	0	0	0	0	0	0	0	0	0	0	0	0	0	0	0	0	0	0	0	0	0	0	0	0	0	0	0	0	0	0	0	0	0	0	0	0
II	2475799	2475804	0	0	0	0	0	0	0	0	0	0	0	0	1	0	0	0	0	0	0	0	0	0	0	0	0	0	0	0	0	0	0	0	0	0	0	0	0	0	0	0	0	0	0	0	0	0	0
II	2484569	2484570	0	0	0	0	0	0	0	0	0	0	0	0	0	0	0	0	0	1	0	0	0	0	0	0	0	0	0	0	0	0	0	0	0	0	0	0	0	0	0	0	0	0	0	0	0	0	0
II	2484860	2484861	0	0	0	0	0	0	0	0	0	0	0	0	0	0	0	0	0	0	0	0	0	0	0	0	0	0	0	0	0	0	0	0	0	0	0	0	0	0	0	0	0	0	0	1	0	0	0
II	2528180	2528181	0	0	0	0	0	0	0	0	0	0	0	0	0	0	0	0	0	0	0	1	0	0	0	0	0	0	0	0	0	0	0	0	0	0	0	0	0	0	0	0	0	0	0	0	0	0	0
II	2555749	2555750	0	0	0	0	0	0	0	0	0	0	0	0	0	0	0	0	0	0	0	0	0	0	0	0	0	0	0	0	0	0	0	0	0	0	0	0	0	0	0	0	0	0	0	0	0	0	0
II	2568506	2568507	0	0	0	0	0	0	0	0	0	0	0	0	0	0	0	0	0	0	0	0	0	0	0	0	0	0	0	0	0	0	0	0	0	0	0	0	0	0	0	0	0	0	0	0	0	0	0
II	2568807	2568812	0	0	0	0	0	0	0	0	0	0	0	0	0	0	0	0	0	0	0	0	0	0	0	0	0	0	0	0	0	0	0	0	0	0	0	0	0	0	0	0	1	0	0	0	0	0	0
II	2568846	2568847	0	0	0	0	0	0	1	0	0	0	0	0	0	0	0	0	0	0	0	0	0	0	0	0	0	0	0	0	0	0	0	0	0	0	0	0	0	0	0	0	0	0	0	0	0	0	0
II	2591136	2591137	0	0	0	0	0	0	0	0	0	0	0	0	1	0	0	0	0	0	0	0	0	0	0	0	0	0	0	0	0	0	0	0	0	0	0	0	0	0	0	0	0	0	0	0	0	0	0
II	2601402	2601403	0	0	0	0	0	0	1	0	0	0	0	0	0	0	0	0	0	0	0	0	0	0	0	0	0	0	0	0	0	0	0	0	0	0	0	0	0	0	0	0	0	0	0	0	0	0	0
II	2626798	2626799	0	0	0	0	0	0	0	0	0	0	0	0	0	0	0	0	0	0	0	0	0	0	0	0	0	0	0	1	0	0	0	0	0	0	0	0	0	0	0	0	0	0	0	0	0	0	0
II	2627184	2627185	0	0	0	0	0	0	0	0	0	0	0	0	0	0	0	0	0	0	0	0	0	0	0	0	0	0	0	0	0	0	0	0	0	0	0	0	0	0	0	0	0	0	0	0	0	0	0
II	2646762	2646763	0	0	0	0	0	0	0	0	0	0	0	0	0	0	0	0	0	0	0	0	0	0	0	0	0	0	0	0	0	0	0	0	0	0	0	0	0	0	0	0	0	0	0	0	0	0	0
II	2690724	2690725	0	0	0	0	0	0	0	0	0	0	0	0	0	0	0	0	0	0	0	0	0	0	0	0	0	0	0	0	0	0	0	0	0	1	0	0	0	0	0	0	0	0	0	0	0	0	0
II	2711854	2711855	1	0	0	0	0	0	0	0	0	0	0	0	0	0	0	0	0	0	0	0	0	0	0	0	0	0	0	0	0	0	0	0	0	0	0	0	0	0	0	0	0	0	0	0	0	0	0
II	2716744	2716745	0	0	0	0	0	0	0	0	0	0	0	0	0	0	0	0	1	0	0	0	0	0	0	0	0	0	0	0	0	0	0	0	0	0	0	0	0	0	0	0	0	0	0	0	0	0	0
II	2750766	2750774	0	0	1	0	0	0	0	0	0	0	0	0	0	0	0	0	0	0	0	0	0	0	0	0	0	0	0	0	0	0	0	0	0	0	0	0	0	0	0	0	0	0	0	0	0	0	0
II	2750800	2750805	0	0	0	0	0	1	0	0	0	0	0	0	0	0	0	0	0	0	0	0	0	0	0	0	0	0	0	0	0	0	0	0	0	0	0	0	0	0	0	0	0	0	0	0	0	0	0
II	2759417	2759422	0	1	0	0	0	0	0	0	0	0	0	0	0	0	0	0	0	0	0	0	0	0	0	0	0	0	0	0	0	0	0	0	0	0	0	0	0	0	0	0	0	0	0	0	0	0	0
II	2780783	2780784	0	0	0	0	0	0	0	0	0	0	0	0	0	0	0	0	0	0	0	0	0	0	0	0	0	0	0	0	0	0	0	0	0	0	0	0	0	0	0	0	0	0	0	0	0	0	0
II	2794374	2794375	0	0	0	0	0	0	0	0	0	0	0	0	0	0	0	0	0	0	0	0	0	0	0	0	0	0	0	0	0	0	0	0	0	0	0	0	0	0	0	1	0	0	0	0	0	0	0
II	2848410	2848411	0	0	0	0	0	0	0	0	0	0	0	0	0	0	0	0	0	0	0	0	0	0	0	0	0	0	0	0	0	1	0	0	0	0	0	0	0	0	0	0	0	0	0	0	0	0	0
II	2881531	2881532	0	0	0	0	0	0	0	0	0	0	0	0	0	0	0	0	0	0	0	0	0	0	0	0	1	0	0	0	0	0	0	0	0	0	0	0	0	0	0	0	0	0	0	0	0	0	0
II	2886539	2886540	0	0	0	0	0	0	0	0	0	0	0	0	0	0	0	0	0	0	0	0	0	0	0	0	0	0	0	0	0	0	0	0	0	0	0	0	0	0	0	0	0	0	0	0	0	0	0
II	2895354	2895355	0	0	0	0	0	0	1	0	0	0	0	0	0	0	0	0	0	0	0	0	0	0	0	0	0	0	0	0	0	0	0	0	0	0	0	0	0	0	0	0	0	0	0	0	0	0	0
II	2902151	2902152	0	0	0	0	0	1	0	0	0	0	0	0	0	0	0	0	0	0	0	0	0	0	0	0	0	0	0	0	0	0	0	0	0	0	0	0	0	0	0	0	0	0	0	0	0	0	0
II	2908719	2908720	0	0	0	0	0	0	0	0	0	0	0	0	0	0	0	0	0	0	0	0	0	0	0	0	0	0	0	0	0	0	0	0	0	0	0	0	0	0	0	0	0	0	0	0	0	0	0
II	2927857	2927858	0	0	0	0	0	0	0	0	0	0	0	0	0	0	0	0	0	0	0	0	0	0	0	0	1	0	0	0	0	0	0	0	0	0	0	0	0	0	0	0	0	0	0	0	0	0	0
II	2941295	2941296	0	0	0	0	0	0	0	0	0	0	0	0	0	0	1	0	0	0	0	0	0	0	0	0	0	0	0	0	0	0	0	0	0	0	0	0	0	0	0	0	0	0	0	0	0	0	0
II	2955575	2955576	0	0	0	0	0	0	0	0	0	0	0	0	0	0	0	0	0	0	0	0	0	0	0	0	0	0	0	0	0	0	0	0	0	0	0	0	0	0	0	0	0	0	0	0	0	0	0
II	2957252	2957253	0	0	0	0	0	0	0	0	0	0	0	0	0	0	0	0	0	0	0	0	0	0	0	0	0	0	0	0	0	0	0	0	0	0	0	0	0	0	0	0	0	0	0	1	0	0	0
II	2961292	2961293	0	0	0	0	0	0	0	0	0	0	0	0	0	0	0	0	0	0	0	0	0	0	0	0	0	0	0	0	0	0	0	0	0	0	0	0	0	0	0	0	0	0	1	0	0	0	0
II	2962730	2962736	0	0	0	0	0	0	0	0	0	0	0	0	0	0	0	0	0	0	0	0	0	0	0	0	0	0	0	0	0	0	0	0	0	0	0	0	0	0	0	0	0	0	0	0	0	0	0
II	2979782	2979783	0	0	0	0	0	0	0	0	0	0	0	0	0	0	0	0	0	0	0	0	0	0	0	0	0	0	0	0	0	0	0	0	0	0	0	0	0	0	0	0	0	0	1	0	0	0	0
II	2983812	2983813	0	0	0	0	0	0	0	0	0	0	0	0	0	0	0	0	0	0	0	0	0	0	0	0	0	0	0	0	0	0	0	0	0	0	0	0	0	0	0	0	0	0	0	0	0	0	0
II	3003921	3003922	0	0	0	0	0	0	0	0	0	0	0	0	0	0	0	0	0	0	0	0	0	0	0	0	0	0	0	0	0	0	0	0	0	0	0	0	0	0	0	0	0	0	0	0	0	0	0
II	3052430	3052431	0	0	0	0	0	0	0	0	0	0	0	0	1	0	0	0	0	0	0	0	0	0	0	0	0	0	0	0	0	0	0	0	0	0	0	0	0	0	0	0	0	0	0	0	0	0	0
II	3085441	3085447	0	0	0	0	0	0	0	0	0	0	0	0	0	0	0	0	1	0	0	0	0	0	0	0	0	0	0	0	0	0	0	0	0	0	0	0	0	0	0	0	0	0	0	0	0	0	0
II	3085452	3085482	0	0	0	0	0	0	0	0	0	0	0	0	0	0	0	0	0	0	0	0	0	0	0	0	0	0	0	0	0	0	0	0	0	0	0	0	0	0	1	0	0	0	0	0	0	0	0
II	3096436	3096437	0	0	0	0	0	0	0	0	0	0	0	0	0	0	0	0	0	0	0	0	0	0	0	0	0	0	0	0	0	0	0	0	0	0	0	0	0	0	0	0	1	0	0	0	0	0	0
II	3112315	3112316	0	0	0	0	0	0	0	0	0	0	0	0	0	0	0	0	0	0	0	0	0	0	0	0	0	0	0	0	0	0	0	0	0	0	0	0	0	0	0	0	0	0	0	0	0	0	0
II	3127697	3127702	0	0	0	0	0	0	0	0	0	0	0	0	0	0	0	0	0	0	0	1	0	0	0	0	0	0	0	0	0	0	0	0	0	0	0	0	0	0	0	0	0	0	0	0	0	0	0
II	3127697	3127702	0	0	0	0	0	0	0	0	0	0	0	0	0	0	0	0	0	0	0	0	0	0	0	0	0	0	0	0	0	0	0	0	0	0	0	0	0	0	0	0	0	0	0	0	0	0	0
II	3127718	3127724	0	0	0	0	0	0	0	0	0	0	0	0	0	0	0	0	1	0	0	0	0	0	0	0	0	0	0	0	0	0	0	0	0	0	0	0	0	0	0	0	0	0	0	0	0	0	0
II	3136253	3136254	0	0	0	0	0	0	0	0	0	0	0	0	0	0	0	0	0	0	1	0	0	0	0	0	0	0	0	0	0	0	0	0	0	0	0	0	0	0	0	0	0	0	0	0	0	0	0
II	3154753	3154754	0	0	0	0	0	0	0	0	0	0	0	0	0	0	0	0	0	0	0	0	0	0	0	0	0	0	0	0	0	0	0	0	0	0	0	0	0	0	0	0	0	0	1	0	0	0	0
II	3169226	3169227	0	0	0	0	0	0	0	0	0	0	0	0	0	0	0	0	0	0	0	0	0	0	0	0	0	0	0	0	0	0	0	0	0	0	0	0	0	0	0	0	0	0	0	0	0	0	0
II	3199980	3199981	0	0	0	0	0	1	0	0	0	0	0	0	0	0	0	0	0	0	0	0	0	0	0	0	0	0	0	0	0	0	0	0	0	0	0	0	0	0	0	0	0	0	0	0	0	0	0
II	3208927	3208928	0	0	0	0	0	0	0	0	0	0	0	0	0	0	0	0	0	0	0	0	0	0	0	0	0	0	0	0	0	0	0	0	0	0	0	0	0	0	0	0	0	0	0	0	0	0	0
II	3244926	3244931	0	0	0	0	0	0	0	0	0	0	0	0	1	0	0	0	0	0	0	0	0	0	0	0	0	0	0	0	0	0	0	0	0	0	0	0	0	0	0	0	0	0	0	0	0	0	0
II	3251374	3251375	0	0	0	0	0	0	0	0	0	0	0	0	0	0	0	1	0	0	0	0	0	0	0	0	0	0	0	0	0	0	0	0	0	0	0	0	0	0	0	0	0	0	0	0	0	0	0
II	3263165	3263166	0	0	0	0	1	0	0	0	0	0	0	0	0	0	0	0	0	0	0	0	0	0	0	0	0	0	0	0	0	0	0	0	0	0	0	0	0	0	0	0	0	0	0	0	0	0	0
II	3282585	3282586	0	0	0	0	0	0	0	0	0	0	0	0	0	0	0	0	0	0	0	0	0	0	0	0	0	0	0	0	0	0	0	0	0	0	0	0	0	0	0	0	0	0	0	1	0	0	0
II	3326550	3326551	0	0	0	0	0	0	0	0	0	0	0	0	1	0	0	0	0	0	0	0	0	0	0	0	0	0	0	0	0	0	0	0	0	0	0	0	0	0	0	0	0	0	0	0	0	0	0
II	3387513	3387514	0	0	0	0	0	0	0	0	0	0	0	0	0	0	0	0	0	0	0	0	0	0	0	0	0	0	0	0	0	0	0	0	0	0	0	0	0	0	0	0	0	0	1	0	0	0	0
II	3424553	3424557	0	0	0	0	0	0	0	0	0	0	0	0	1	0	0	0	0	0	0	0	0	0	0	0	0	0	0	0	0	0	0	0	0	0	0	0	0	0	0	0	0	0	0	0	0	0	0
II	3424578	3424583	0	1	0	0	0	0	0	0	0	0	0	0	0	0	0	0	0	0	0	0	0	0	0	0	0	0	0	0	0	0	0	0	0	0	0	0	0	0	0	0	0	0	0	0	0	0	0
II	3425897	3425898	0	0	0	0	0	0	0	0	0	0	0	0	0	0	0	0	0	0	0	0	0	0	0	0	0	0	0	0	0	0	0	0	0	0	0	0	0	0	0	0	0	0	1	0	0	0	0
II	3446404	3446405	0	0	0	0	0	1	0	0	0	0	0	0	0	0	0	0	0	0	0	0	0	0	0	0	0	0	0	0	0	0	0	0	0	0	0	0	0	0	0	0	0	0	0	0	0	0	0
II	3464596	3464597	0	0	0	0	0	0	0	0	0	0	0	0	0	0	0	0	0	0	0	0	0	0	0	0	0	0	0	0	0	0	0	0	0	0	0	0	0	0	0	0	0	0	0	0	0	0	1
II	3489169	3489170	0	0	0	0	0	0	0	0	0	0	0	0	0	0	0	0	0	0	0	0	0	0	0	0	0	0	1	0	0	0	0	0	0	0	0	0	0	0	0	0	0	0	0	0	0	0	0
II	3491567	3491568	0	0	0	0	0	0	0	0	0	0	0	0	0	0	0	0	0	0	0	0	0	0	0	0	0	0	0	0	0	0	0	0	0	0	0	0	0	0	0	0	0	0	0	0	0	0	0
II	3497727	3497728	1	0	0	0	0	0	0	0	0	0	0	0	0	0	0	0	0	0	0	0	0	0	0	0	0	0	0	0	0	0	0	0	0	0	0	0	0	0	0	0	0	0	0	0	0	0	0
II	3512509	3512510	0	0	0	0	0	0	0	0	0	0	0	0	1	0	0	0	0	0	0	0	0	0	0	0	0	0	0	0	0	0	0	0	0	0	0	0	0	0	0	0	0	0	0	0	0	0	0
II	3538173	3538174	1	0	0	0	0	0	0	0	0	0	0	0	0	0	0	0	0	0	0	0	0	0	0	0	0	0	0	0	0	0	0	0	0	0	0	0	0	0	0	0	0	0	0	0	0	0	0
II	3555836	3555837	0	0	0	0	0	0	0	0	0	0	0	0	0	0	0	0	0	0	0	0	0	0	0	0	0	0	0	0	0	0	0	0	0	0	0	0	0	0	0	0	0	0	0	0	1	0	0
II	3620631	3620632	0	0	0	0	0	0	0	0	0	0	0	0	0	0	0	0	0	0	0	0	0	0	0	0	0	0	0	0	0	0	0	0	0	0	0	0	0	0	0	0	0	0	0	0	0	0	0
II	3622549	3622550	0	0	0	0	0	0	0	0	0	0	0	0	1	0	0	0	0	0	0	0	0	0	0	0	0	0	0	0	0	0	0	0	0	0	0	0	0	0	0	0	0	0	0	0	0	0	0
II	3628006	3628007	0	0	0	0	1	0	0	0	0	0	0	0	0	0	0	0	0	0	0	0	0	0	0	0	0	0	0	0	0	0	0	0	0	0	0	0	0	0	0	0	0	0	0	0	0	0	0
II	3681773	3681778	0	0	0	0	0	0	0	0	0	0	0	0	0	0	0	0	0	0	0	0	1	0	0	0	0	0	0	0	0	0	0	0	0	0	0	0	0	0	0	0	0	0	0	0	0	0	0
II	3681881	3681908	0	0	0	0	0	0	0	0	0	0	0	0	0	0	0	0	0	0	0	0	0	0	0	0	0	0	0	0	0	0	0	0	0	0	0	0	0	0	0	0	0	0	0	0	0	0	1
II	3752200	3752201	0	0	0	0	0	0	0	0	0	0	0	0	0	0	0	0	0	0	0	0	0	0	0	0	0	0	0	0	0	0	0	0	0	0	0	0	0	0	0	0	0	0	0	0	0	0	0
II	3849514	3849515	0	0	0	0	0	0	0	0	0	0	0	0	1	0	0	0	0	0	0	0	0	0	0	0	0	0	0	0	0	0	0	0	0	0	0	0	0	0	0	0	0	0	0	0	0	0	0
II	3849759	3849766	0	0	0	0	0	0	0	0	0	0	0	0	0	0	0	0	0	0	0	0	0	0	0	0	0	0	0	0	0	0	0	0	0	0	0	0	0	0	0	0	0	0	0	0	0	0	0
II	3849843	3849849	0	0	0	0	0	0	0	0	0	0	0	0	0	0	0	0	1	0	0	0	0	0	0	0	0	0	0	0	0	0	0	0	0	0	0	0	0	0	0	0	0	0	0	0	0	0	0
II	3849854	3849860	0	0	0	0	0	0	0	0	0	0	0	0	0	0	0	0	0	0	0	0	0	0	0	0	0	0	0	0	0	0	0	0	0	0	0	0	0	0	0	0	1	0	0	0	0	0	0
II	3861910	3861911	0	0	0	0	0	1	0	0	0	0	0	0	0	0	0	0	0	0	0	0	0	0	0	0	0	0	0	0	0	0	0	0	0	0	0	0	0	0	0	0	0	0	0	0	0	0	0
II	3868765	3868766	0	0	0	0	0	0	0	0	0	0	0	0	0	0	0	0	0	0	0	0	0	0	0	0	0	0	0	0	0	0	0	0	0	0	0	0	0	0	0	0	1	0	0	0	0	0	0
II	3920027	3920028	0	0	0	0	0	0	0	0	0	0	0	0	0	0	0	0	0	0	0	0	0	0	0	0	0	0	0	0	0	1	0	0	0	0	0	0	0	0	0	0	0	0	0	0	0	0	0
II	3934441	3934442	0	0	0	0	0	0	0	0	0	0	0	0	0	0	0	0	0	0	0	0	0	0	0	0	0	0	0	0	0	0	0	0	0	0	0	0	0	0	0	0	0	0	0	0	0	0	0
II	3956206	3956207	0	0	0	0	0	0	0	0	0	0	0	0	0	0	0	0	0	0	0	0	0	0	0	0	0	0	0	0	0	0	0	0	0	0	0	0	0	0	0	0	0	0	0	0	0	0	0
II	3975624	3975625	0	1	0	0	0	0	0	0	0	0	0	0	0	0	0	0	0	0	0	0	0	0	0	0	0	0	0	0	0	0	0	0	0	0	0	0	0	0	0	0	0	0	0	0	0	0	0
II	4032371	4032372	0	0	0	0	0	0	0	0	0	0	0	0	0	0	0	0	0	0	0	0	0	0	0	0	0	0	0	0	0	0	0	0	0	0	0	0	0	0	0	0	0	0	0	0	1	0	0
II	4045572	4045577	0	0	0	0	0	0	0	0	0	0	0	0	1	0	0	0	0	0	0	0	0	0	0	0	0	0	0	0	0	0	0	0	0	0	0	0	0	0	0	0	0	0	0	0	0	0	0
II	4045572	4045577	1	0	0	0	0	0	0	0	0	0	0	0	0	0	0	0	0	0	0	0	0	0	0	0	0	0	0	0	0	0	0	0	0	0	0	0	0	0	0	0	0	0	0	0	0	0	0
II	4077025	4077026	0	0	0	0	0	1	0	0	0	0	0	0	0	0	0	0	0	0	0	0	0	0	0	0	0	0	0	0	0	0	0	0	0	0	0	0	0	0	0	0	0	0	0	0	0	0	0
II	4079002	4079003	0	1	0	0	0	0	0	0	0	0	0	0	0	0	0	0	0	0	0	0	0	0	0	0	0	0	0	0	0	0	0	0	0	0	0	0	0	0	0	0	0	0	0	0	0	0	0
II	4088257	4088258	0	0	0	0	0	0	0	0	0	0	0	0	0	0	0	0	0	0	0	1	0	0	0	0	0	0	0	0	0	0	0	0	0	0	0	0	0	0	0	0	0	0	0	0	0	0	0
II	4094106	4094107	0	0	0	0	0	0	1	0	0	0	0	0	0	0	0	0	0	0	0	0	0	0	0	0	0	0	0	0	0	0	0	0	0	0	0	0	0	0	0	0	0	0	0	0	0	0	0
II	4157560	4157561	0	0	0	0	0	0	0	0	0	0	0	0	0	0	0	0	0	0	0	1	0	0	0	0	0	0	0	0	0	0	0	0	0	0	0	0	0	0	0	0	0	0	0	0	0	0	0
II	4214831	4214845	0	0	0	0	0	0	0	0	0	0	0	0	1	0	0	0	0	0	0	0	0	0	0	0	0	0	0	0	0	0	0	0	0	0	0	0	0	0	0	0	0	0	0	0	0	0	0
II	4214866	4214871	0	0	0	0	0	0	0	0	0	0	0	0	0	0	1	0	0	0	0	0	0	0	0	0	0	0	0	0	0	0	0	0	0	0	0	0	0	0	0	0	0	0	0	0	0	0	0
II	4230853	4230854	0	0	0	0	0	0	0	0	0	0	0	0	0	0	0	0	0	0	0	0	0	0	0	0	0	0	0	0	0	0	0	0	0	0	0	0	0	0	0	0	0	0	0	0	0	0	0
II	4231303	4231304	0	0	0	0	0	0	0	0	0	0	0	0	0	0	0	0	0	0	0	0	0	0	0	0	0	0	0	0	0	0	0	0	0	0	0	0	0	0	1	0	0	0	0	0	0	0	0
II	4243393	4243394	0	0	0	0	0	0	0	0	0	0	0	0	0	0	0	0	0	0	0	0	0	0	0	0	0	0	0	1	0	0	0	0	0	0	0	0	0	0	0	0	0	0	0	0	0	0	0
II	4265210	4265211	0	0	0	0	0	0	0	0	0	0	0	0	0	0	0	0	0	0	0	0	0	1	0	0	0	0	0	0	0	0	0	0	0	0	0	0	0	0	0	0	0	0	0	0	0	0	0
II	4281925	4281926	0	0	0	0	0	0	0	0	0	0	0	0	0	0	0	0	0	0	0	0	0	0	0	0	0	0	0	0	0	0	0	0	0	0	0	0	0	0	0	0	0	0	1	0	0	0	0
II	4293196	4293197	0	0	0	0	0	0	0	0	0	0	0	0	0	0	0	0	0	0	0	0	0	0	0	0	0	0	0	0	0	0	0	0	0	0	0	0	0	0	0	0	1	0	0	0	0	0	0
II	4312339	4312340	0	0	0	0	0	1	0	0	0	0	0	0	0	0	0	0	0	0	0	0	0	0	0	0	0	0	0	0	0	0	0	0	0	0	0	0	0	0	0	0	0	0	0	0	0	0	0
II	4363833	4363834	0	0	0	0	0	0	0	0	0	0	0	0	0	0	0	0	0	0	0	0	0	0	0	0	0	0	0	1	0	0	0	0	0	0	0	0	0	0	0	0	0	0	0	0	0	0	0
II	4379683	4379684	0	0	0	0	0	0	0	0	0	0	0	0	0	0	0	0	0	0	0	0	0	0	0	0	0	0	0	0	0	0	0	0	0	0	0	0	0	0	0	0	0	0	0	0	0	0	0
II	4387462	4387463	0	1	0	0	0	0	0	0	0	0	0	0	0	0	0	0	0	0	0	0	0	0	0	0	0	0	0	0	0	0	0	0	0	0	0	0	0	0	0	0	0	0	0	0	0	0	0
II	4391250	4391251	0	0	0	0	1	0	0	0	0	0	0	0	0	0	0	0	0	0	0	0	0	0	0	0	0	0	0	0	0	0	0	0	0	0	0	0	0	0	0	0	0	0	0	0	0	0	0
II	4430019	4430020	0	0	0	0	0	0	0	0	0	0	0	0	0	0	0	0	0	0	0	0	0	0	0	0	0	0	0	0	0	0	0	0	0	0	0	0	0	0	0	0	0	0	0	0	0	0	1
II	4431695	4431696	0	0	0	0	0	0	0	0	0	0	0	0	1	0	0	0	0	0	0	0	0	0	0	0	0	0	0	0	0	0	0	0	0	0	0	0	0	0	0	0	0	0	0	0	0	0	0
II	4480782	4480783	0	0	0	0	0	0	0	0	0	0	0	0	0	0	0	0	0	0	0	0	0	0	0	0	0	0	0	0	0	0	0	0	0	0	0	0	0	0	0	0	1	0	0	0	0	0	0
III	72584	72585	0	0	0	0	1	0	0	0	0	0	0	0	0	0	0	0	0	0	0	0	0	0	0	0	0	0	0	0	0	0	0	0	0	0	0	0	0	0	0	0	0	0	0	0	0	0	0
III	140573	140574	0	0	0	0	0	0	0	0	0	0	0	0	0	0	0	0	0	0	0	0	0	0	0	0	0	0	0	0	0	0	0	0	0	0	0	0	0	0	0	0	0	0	0	1	0	0	0
III	159618	159619	0	0	0	0	0	0	0	0	0	0	0	0	0	0	0	0	0	0	0	0	0	0	0	0	0	0	0	0	0	0	0	0	0	0	0	0	0	0	0	0	0	0	0	0	0	0	1
III	199547	199548	0	0	0	0	0	0	0	0	0	0	0	0	0	0	0	0	0	0	0	0	0	0	0	0	0	0	0	0	0	0	0	0	0	0	0	0	0	0	0	0	0	0	0	0	0	0	0
III	199874	199875	0	0	0	0	0	0	0	0	0	0	0	0	0	0	0	0	0	0	0	0	0	0	0	0	0	0	0	0	0	0	0	0	0	0	0	0	0	0	0	0	0	0	0	0	0	0	0
III	236818	236819	0	0	0	0	0	0	0	0	0	0	0	0	0	0	0	0	0	0	0	0	0	0	0	0	0	0	1	0	0	0	0	0	0	0	0	0	0	0	0	0	0	0	0	0	0	0	0
III	242840	242841	0	1	0	0	0	0	0	0	0	0	0	0	0	0	0	0	0	0	0	0	0	0	0	0	0	0	0	0	0	0	0	0	0	0	0	0	0	0	0	0	0	0	0	0	0	0	0
III	269620	269621	0	0	0	0	0	0	0	0	0	0	0	0	0	0	0	0	0	0	0	0	0	0	0	0	0	0	0	0	0	0	0	0	0	0	0	0	0	0	1	0	0	0	0	0	0	0	0
III	277527	277528	0	0	0	0	0	0	0	0	0	0	0	0	0	0	0	0	0	0	0	0	0	0	0	0	0	0	0	0	0	0	0	0	0	0	0	0	0	0	0	0	0	0	1	0	0	0	0
III	285596	285597	0	0	0	0	0	0	0	0	0	0	0	0	0	0	0	0	0	0	0	0	0	0	0	0	0	0	0	0	0	0	0	0	0	1	0	0	0	0	0	0	0	0	0	0	0	0	0
III	293301	293302	0	0	0	0	0	0	0	0	0	0	0	0	0	0	0	0	0	0	0	0	0	0	0	0	0	0	0	0	0	0	0	0	0	0	0	0	0	0	0	0	0	0	0	0	0	0	0
III	296668	296669	0	0	0	0	0	0	0	0	0	0	0	0	0	0	0	0	0	0	0	0	0	0	0	0	0	0	0	0	0	0	0	0	0	0	0	0	0	0	0	0	0	0	0	0	0	0	0
III	332674	332675	0	0	0	0	0	0	0	0	0	0	0	0	0	0	1	0	0	0	0	0	0	0	0	0	0	0	0	0	0	0	0	0	0	0	0	0	0	0	0	0	0	0	0	0	0	0	0
III	346490	346496	0	0	0	0	0	0	0	0	0	0	0	0	0	0	0	0	0	0	0	0	0	0	0	0	0	0	0	0	0	0	0	0	0	0	0	0	0	0	0	0	0	0	0	0	0	0	0
III	346606	346611	0	0	0	0	1	0	0	0	0	0	0	0	0	0	0	0	0	0	0	0	0	0	0	0	0	0	0	0	0	0	0	0	0	0	0	0	0	0	0	0	0	0	0	0	0	0	0
III	346884	346885	0	0	0	0	0	0	0	0	0	0	0	0	0	0	0	0	0	0	0	0	0	0	0	0	0	0	0	0	0	0	0	0	0	0	0	0	1	0	0	0	0	0	0	0	0	0	0
III	348065	348066	0	0	0	0	0	0	0	0	0	0	0	0	0	0	0	0	0	0	0	0	0	0	0	0	0	0	0	0	0	0	0	0	0	0	0	0	0	0	0	0	0	0	0	0	0	0	0
III	378079	378080	0	0	0	0	0	0	0	0	0	0	0	0	0	0	0	0	0	0	0	0	0	0	0	0	0	0	0	0	0	0	0	0	0	0	0	0	0	0	0	0	0	1	0	0	0	0	0
III	409010	409011	0	0	0	0	0	0	0	0	0	0	0	0	0	0	0	0	0	0	0	0	0	0	0	0	0	0	0	0	0	0	0	0	0	0	0	0	0	0	0	0	0	0	0	1	0	0	0
III	475789	475790	0	0	0	0	0	0	0	0	0	0	0	0	0	0	0	0	0	0	0	0	0	0	0	0	0	0	0	0	0	0	0	0	0	0	0	0	0	0	0	0	0	0	0	0	0	0	0
III	479621	479622	0	0	0	0	0	0	0	0	0	0	0	0	0	0	0	0	0	0	0	0	0	0	0	0	0	0	0	0	0	0	0	0	0	0	0	0	0	0	0	0	1	0	0	0	0	0	0
III	496073	496074	0	0	0	0	0	0	0	0	0	0	0	0	0	0	0	0	0	0	0	0	0	0	0	0	0	0	0	0	0	0	0	0	0	0	0	0	0	0	0	0	0	0	0	0	0	0	0
III	606159	606160	0	0	0	0	0	0	0	0	0	0	0	0	0	0	0	0	1	0	0	0	0	0	0	0	0	0	0	0	0	0	0	0	0	0	0	0	0	0	0	0	0	0	0	0	0	0	0
III	661286	661287	0	0	0	0	0	0	0	0	0	0	0	0	0	0	0	0	0	0	0	1	0	0	0	0	0	0	0	0	0	0	0	0	0	0	0	0	0	0	0	0	0	0	0	0	0	0	0
III	668561	668562	0	0	0	0	0	0	0	0	0	0	0	0	0	0	0	0	0	0	1	0	0	0	0	0	0	0	0	0	0	0	0	0	0	0	0	0	0	0	0	0	0	0	0	0	0	0	0
III	698698	698699	0	0	0	0	0	0	0	0	0	0	0	0	0	0	0	0	0	0	0	0	0	0	0	0	0	0	0	0	0	0	0	0	0	0	0	0	0	0	0	0	0	0	1	0	0	0	0
III	707461	707462	0	0	0	0	0	0	0	0	0	0	0	0	0	0	0	0	0	0	0	0	0	0	0	0	0	0	0	0	0	0	0	0	0	0	0	0	0	0	0	0	0	0	0	0	0	0	0
III	719049	719050	0	0	0	0	0	0	0	0	0	0	0	0	0	0	0	0	0	0	0	0	0	0	0	0	0	0	0	0	0	0	0	0	0	0	0	0	0	0	0	0	0	0	0	0	1	0	0
III	719554	719555	0	0	0	0	0	0	0	0	0	0	0	0	0	0	0	0	0	0	0	0	0	0	0	0	0	0	0	1	0	0	0	0	0	0	0	0	0	0	0	0	0	0	0	0	0	0	0
III	757227	757228	0	1	0	0	0	0	0	0	0	0	0	0	0	0	0	0	0	0	0	0	0	0	0	0	0	0	0	0	0	0	0	0	0	0	0	0	0	0	0	0	0	0	0	0	0	0	0
III	809540	809541	0	0	0	0	0	0	0	0	0	0	0	0	0	0	1	0	0	0	0	0	0	0	0	0	0	0	0	0	0	0	0	0	0	0	0	0	0	0	0	0	0	0	0	0	0	0	0
III	821210	821211	0	0	0	0	0	0	0	0	0	0	0	0	0	0	0	0	0	0	0	0	0	0	0	0	0	0	0	0	0	0	0	0	0	0	0	0	0	0	0	0	0	0	0	0	0	0	0
III	827810	827811	0	0	0	0	0	0	0	0	0	0	0	0	0	0	0	0	0	0	0	0	0	0	0	0	0	0	0	0	0	0	0	0	0	0	0	0	0	0	0	0	0	0	0	0	0	0	0
III	861013	861014	0	0	0	0	0	0	0	0	0	0	0	0	0	0	0	0	0	0	1	0	0	0	0	0	0	0	0	0	0	0	0	0	0	0	0	0	0	0	0	0	0	0	0	0	0	0	0
III	869536	869537	0	0	0	0	0	1	0	0	0	0	0	0	0	0	0	0	0	0	0	0	0	0	0	0	0	0	0	0	0	0	0	0	0	0	0	0	0	0	0	0	0	0	0	0	0	0	0
III	917636	917641	0	0	0	0	0	0	0	0	0	0	0	0	0	0	0	0	0	0	0	0	0	0	0	0	0	0	0	0	0	0	0	0	0	0	0	0	0	0	0	0	0	0	0	0	0	0	0
III	917668	917674	0	0	0	0	0	1	0	0	0	0	0	0	0	0	0	0	0	0	0	0	0	0	0	0	0	0	0	0	0	0	0	0	0	0	0	0	0	0	0	0	0	0	0	0	0	0	0
III	917703	917708	0	0	0	0	0	0	0	0	0	0	0	0	0	0	0	0	0	0	0	0	0	0	0	0	0	0	0	0	0	0	0	0	0	0	0	0	0	0	0	0	0	0	0	1	0	0	0
III	939118	939119	0	0	0	0	0	0	1	0	0	0	0	0	0	0	0	0	0	0	0	0	0	0	0	0	0	0	0	0	0	0	0	0	0	0	0	0	0	0	0	0	0	0	0	0	0	0	0
III	953847	953848	0	0	0	0	0	0	0	0	0	0	0	0	1	0	0	0	0	0	0	0	0	0	0	0	0	0	0	0	0	0	0	0	0	0	0	0	0	0	0	0	0	0	0	0	0	0	0
III	954180	954181	0	0	0	0	0	0	0	0	0	0	0	0	0	0	0	0	0	0	0	0	0	0	0	0	0	0	0	0	0	0	0	0	0	0	0	0	0	0	0	0	0	0	0	0	0	0	0
III	972676	972682	0	0	0	0	0	1	0	0	0	0	0	0	0	0	0	0	0	0	0	0	0	0	0	0	0	0	0	0	0	0	0	0	0	0	0	0	0	0	0	0	0	0	0	0	0	0	0
III	992738	992739	0	0	0	0	0	0	0	0	0	0	0	0	1	0	0	0	0	0	0	0	0	0	0	0	0	0	0	0	0	0	0	0	0	0	0	0	0	0	0	0	0	0	0	0	0	0	0
III	995075	995076	0	0	0	0	0	0	0	0	0	0	0	0	0	0	0	0	0	0	0	0	0	0	0	0	1	0	0	0	0	0	0	0	0	0	0	0	0	0	0	0	0	0	0	0	0	0	0
III	1029418	1029423	0	0	0	0	0	0	0	0	0	0	0	0	0	0	0	0	0	0	0	0	0	0	0	0	0	0	0	0	0	0	0	0	0	0	0	0	0	0	0	0	1	0	0	0	0	0	0
III	1039969	1039987	0	0	0	0	0	0	0	0	0	0	0	0	1	0	0	0	0	0	0	0	0	0	0	0	0	0	0	0	0	0	0	0	0	0	0	0	0	0	0	0	0	0	0	0	0	0	0
III	1043458	1043465	0	0	0	0	0	0	0	0	0	0	0	0	0	0	0	0	0	1	0	0	0	0	0	0	0	0	0	0	0	0	0	0	0	0	0	0	0	0	0	0	0	0	0	0	0	0	0
III	1043492	1043498	0	0	0	0	0	0	0	0	0	0	0	0	0	0	0	1	0	0	0	0	0	0	0	0	0	0	0	0	0	0	0	0	0	0	0	0	0	0	0	0	0	0	0	0	0	0	0
III	1043525	1043530	0	0	0	0	0	0	0	0	0	0	0	0	0	0	0	0	0	0	0	0	0	0	0	0	0	0	0	0	0	0	0	0	0	0	0	0	0	0	0	0	0	1	0	0	0	0	0
III	1150468	1150469	0	0	0	0	1	0	0	0	0	0	0	0	0	0	0	0	0	0	0	0	0	0	0	0	0	0	0	0	0	0	0	0	0	0	0	0	0	0	0	0	0	0	0	0	0	0	0
III	1200477	1200478	1	0	0	0	0	0	0	0	0	0	0	0	0	0	0	0	0	0	0	0	0	0	0	0	0	0	0	0	0	0	0	0	0	0	0	0	0	0	0	0	0	0	0	0	0	0	0
III	1282499	1282500	0	0	0	0	0	0	0	0	0	0	0	0	0	0	0	0	0	0	0	0	0	0	0	0	0	0	0	0	0	0	0	0	0	0	0	0	0	0	0	0	0	0	0	0	0	0	0
III	1287810	1287811	0	0	0	0	0	0	0	0	0	0	0	0	0	0	0	0	0	0	0	0	0	0	0	0	0	0	0	0	0	0	0	0	0	0	0	0	0	0	0	0	0	1	0	0	0	0	0
III	1316049	1316050	0	0	0	0	0	0	0	0	0	0	0	0	0	0	0	0	0	0	0	0	0	0	0	0	0	0	0	0	0	0	0	0	0	0	0	0	0	0	0	0	0	0	0	0	0	0	0
III	1351499	1351500	0	0	0	0	0	0	0	0	0	0	0	0	0	0	0	0	0	0	0	1	0	0	0	0	0	0	0	0	0	0	0	0	0	0	0	0	0	0	0	0	0	0	0	0	0	0	0
III	1355767	1355768	0	0	0	0	0	0	0	0	0	0	0	0	0	0	0	0	0	0	0	0	0	0	0	0	0	0	0	0	0	0	0	0	0	0	0	0	0	0	0	0	0	0	0	0	0	0	0
III	1361033	1361034	0	0	0	0	0	0	0	0	0	0	0	0	0	0	0	0	0	0	0	0	0	0	0	0	0	0	0	0	0	0	0	0	0	0	0	0	0	0	0	0	0	0	0	0	0	0	0
III	1371755	1371756	0	0	0	0	0	0	0	0	0	0	0	0	0	0	0	0	0	0	0	0	0	0	0	0	0	0	0	0	0	0	0	0	0	0	0	1	0	0	0	0	0	0	0	0	0	0	0
III	1401577	1401578	0	0	0	0	0	0	0	0	0	0	0	0	0	0	0	0	0	0	0	0	0	0	0	0	0	0	0	0	0	0	0	0	0	0	0	0	0	0	0	0	0	1	0	0	0	0	0
III	1475485	1475490	0	0	0	0	0	0	0	0	0	0	0	0	0	0	0	0	0	0	0	0	0	0	0	0	0	0	0	0	0	0	0	0	0	0	0	0	0	0	0	0	0	0	0	0	0	0	1
III	1475485	1475490	0	0	0	0	0	0	0	0	0	0	0	0	0	0	0	0	0	0	0	0	0	0	0	0	0	0	0	0	0	0	0	0	0	0	0	0	0	0	0	0	0	0	0	0	0	0	0
III	1492594	1492595	0	0	0	0	0	0	0	0	0	0	0	0	0	0	0	0	0	0	0	0	0	0	0	0	0	0	0	0	0	0	0	0	0	0	0	0	0	0	0	0	0	0	0	0	0	0	0
III	1576565	1576566	0	0	0	0	0	0	1	0	0	0	0	0	0	0	0	0	0	0	0	0	0	0	0	0	0	0	0	0	0	0	0	0	0	0	0	0	0	0	0	0	0	0	0	0	0	0	0
III	1605039	1605040	0	0	0	0	0	0	0	0	0	0	0	0	0	0	0	0	0	1	0	0	0	0	0	0	0	0	0	0	0	0	0	0	0	0	0	0	0	0	0	0	0	0	0	0	0	0	0
III	1630130	1630135	0	0	0	0	0	0	0	0	0	0	0	0	0	0	0	0	0	0	0	0	0	0	0	0	0	0	0	0	0	0	0	0	0	0	0	0	0	0	0	0	0	0	0	0	0	0	0
III	1634872	1634873	0	0	0	0	0	0	0	0	0	0	0	0	0	0	0	0	0	0	0	0	0	0	0	0	0	0	0	0	0	0	0	0	0	0	0	0	0	0	0	0	0	0	0	0	0	0	0
III	1644685	1644686	0	0	0	0	0	0	0	0	0	0	0	0	0	0	0	0	0	0	0	0	0	0	0	0	0	0	0	1	0	0	0	0	0	0	0	0	0	0	0	0	0	0	0	0	0	0	0
III	1662650	1662651	0	0	0	0	0	0	0	0	0	0	0	0	0	0	0	0	0	0	0	0	0	0	0	0	0	0	0	0	0	0	0	0	0	1	0	0	0	0	0	0	0	0	0	0	0	0	0
III	1685395	1685396	0	0	0	0	0	0	0	0	0	0	0	0	0	0	0	0	0	0	0	0	0	0	0	0	0	0	0	0	0	0	0	0	0	0	0	0	0	0	0	0	0	0	0	0	0	0	1
III	1704810	1704815	0	0	0	0	0	0	0	0	0	0	0	0	0	0	0	0	0	0	0	0	0	0	0	0	0	0	0	0	0	0	0	0	0	0	0	0	0	0	0	0	0	0	1	0	0	0	0
III	1704969	1704979	0	0	0	0	0	0	0	0	0	0	0	0	0	0	0	0	0	0	0	0	0	0	0	0	0	0	0	0	0	0	1	0	0	0	0	0	0	0	0	0	0	0	0	0	0	0	0
III	1705010	1705015	0	0	0	0	0	0	0	0	0	0	0	0	0	0	1	0	0	0	0	0	0	0	0	0	0	0	0	0	0	0	0	0	0	0	0	0	0	0	0	0	0	0	0	0	0	0	0
III	1728726	1728727	0	0	0	0	0	0	0	0	0	0	0	0	0	0	0	0	0	0	0	0	0	0	0	0	0	0	0	0	0	0	0	0	0	0	0	0	0	0	0	0	0	0	0	0	0	0	0
III	1740856	1740857	1	0	0	0	0	0	0	0	0	0	0	0	0	0	0	0	0	0	0	0	0	0	0	0	0	0	0	0	0	0	0	0	0	0	0	0	0	0	0	0	0	0	0	0	0	0	0
III	1745531	1745532	0	0	0	0	0	0	0	0	0	0	0	0	0	0	0	0	0	0	0	0	0	0	0	0	1	0	0	0	0	0	0	0	0	0	0	0	0	0	0	0	0	0	0	0	0	0	0
III	1763190	1763191	0	0	0	0	0	1	0	0	0	0	0	0	0	0	0	0	0	0	0	0	0	0	0	0	0	0	0	0	0	0	0	0	0	0	0	0	0	0	0	0	0	0	0	0	0	0	0
III	1800560	1800565	0	0	0	0	0	0	0	0	0	0	0	0	0	0	0	0	0	0	0	0	0	0	0	0	0	0	0	0	0	0	0	0	0	0	0	0	0	0	0	0	0	0	0	0	0	0	1
III	1808731	1808732	0	0	1	0	0	0	0	0	0	0	0	0	0	0	0	0	0	0	0	0	0	0	0	0	0	0	0	0	0	0	0	0	0	0	0	0	0	0	0	0	0	0	0	0	0	0	0
III	1812784	1812785	0	0	0	0	0	0	0	0	0	0	0	0	1	0	0	0	0	0	0	0	0	0	0	0	0	0	0	0	0	0	0	0	0	0	0	0	0	0	0	0	0	0	0	0	0	0	0
III	1821514	1821515	0	0	0	0	0	0	0	0	0	0	0	0	0	0	0	0	0	0	0	0	0	0	0	0	0	0	0	0	0	0	0	0	0	0	0	0	0	0	0	0	0	0	0	0	0	0	0
III	1859025	1859026	0	0	0	0	0	0	0	0	0	0	0	0	0	0	0	0	0	0	0	0	0	0	0	0	0	0	0	0	0	0	0	0	0	0	0	0	0	0	0	0	0	0	0	0	0	0	0
III	1862861	1862862	0	0	0	0	0	0	1	0	0	0	0	0	0	0	0	0	0	0	0	0	0	0	0	0	0	0	0	0	0	0	0	0	0	0	0	0	0	0	0	0	0	0	0	0	0	0	0
III	1876067	1876079	0	0	0	0	0	0	0	0	0	0	0	0	0	0	0	0	0	0	0	0	0	0	0	0	0	0	0	0	0	0	0	0	0	0	0	1	0	0	0	0	0	0	0	0	0	0	0
III	1882356	1882357	0	0	0	0	0	0	0	0	0	0	0	0	0	0	0	0	0	0	0	0	0	0	0	0	0	0	0	0	0	0	0	0	0	0	0	0	0	0	0	0	0	0	0	0	0	0	0
III	1940245	1940246	0	0	0	0	0	0	0	0	0	0	0	0	0	0	0	0	0	0	0	0	0	0	0	0	0	0	0	0	0	0	0	0	0	0	0	0	0	0	0	0	0	0	0	0	0	0	0
III	1960060	1960061	0	1	0	0	0	0	0	0	0	0	0	0	0	0	0	0	0	0	0	0	0	0	0	0	0	0	0	0	0	0	0	0	0	0	0	0	0	0	0	0	0	0	0	0	0	0	0
III	1983091	1983096	1	0	0	0	0	0	0	0	0	0	0	0	0	0	0	0	0	0	0	0	0	0	0	0	0	0	0	0	0	0	0	0	0	0	0	0	0	0	0	0	0	0	0	0	0	0	0
III	1991197	1991198	0	0	0	0	0	0	0	0	0	0	0	0	0	0	0	0	0	0	0	0	0	0	0	0	0	0	0	0	0	0	0	0	0	0	0	0	0	0	0	0	0	0	0	0	0	0	0
III	2004375	2004381	0	0	0	0	0	0	0	0	0	0	0	0	0	0	0	0	0	0	0	0	0	0	0	0	0	0	0	0	0	0	0	0	0	0	0	0	0	0	0	0	0	0	0	0	0	0	0
III	2004461	2004466	0	0	0	0	0	0	0	0	0	0	0	0	0	0	0	0	0	0	0	1	0	0	0	0	0	0	0	0	0	0	0	0	0	0	0	0	0	0	0	0	0	0	0	0	0	0	0
III	2029274	2029309	0	0	0	0	0	0	0	0	0	0	0	0	0	0	0	0	0	0	0	0	0	0	0	1	0	0	0	0	0	0	0	0	0	0	0	0	0	0	0	0	0	0	0	0	0	0	0
III	2029352	2029357	0	0	0	0	0	0	0	0	0	0	0	0	0	0	0	0	0	0	0	0	0	0	0	0	0	0	0	0	0	0	0	0	0	0	0	0	0	0	0	0	0	0	0	0	0	0	0
III	2039897	2039898	0	0	0	0	0	0	0	0	0	0	0	0	1	0	0	0	0	0	0	0	0	0	0	0	0	0	0	0	0	0	0	0	0	0	0	0	0	0	0	0	0	0	0	0	0	0	0
III	2056710	2056711	0	0	0	0	1	0	0	0	0	0	0	0	0	0	0	0	0	0	0	0	0	0	0	0	0	0	0	0	0	0	0	0	0	0	0	0	0	0	0	0	0	0	0	0	0	0	0
III	2064245	2064246	0	0	0	0	0	0	0	0	0	0	0	0	0	0	0	0	0	0	0	0	0	0	0	0	0	0	0	0	0	0	0	0	0	0	0	0	0	0	0	0	0	0	0	0	0	0	0
III	2072505	2072506	0	0	0	0	0	0	0	0	0	0	0	0	0	0	0	0	0	0	0	0	0	0	0	0	0	0	0	0	0	0	0	0	0	0	0	0	0	0	0	0	0	0	0	1	0	0	0
III	2099585	2099591	0	0	0	0	0	0	0	0	0	0	0	0	0	0	1	0	0	0	0	0	0	0	0	0	0	0	0	0	0	0	0	0	0	0	0	0	0	0	0	0	0	0	0	0	0	0	0
III	2109866	2109867	0	0	0	0	0	0	0	0	0	0	0	0	0	0	0	0	0	0	0	0	1	0	0	0	0	0	0	0	0	0	0	0	0	0	0	0	0	0	0	0	0	0	0	0	0	0	0
III	2120504	2120509	0	0	0	0	0	0	0	0	0	0	0	0	0	0	0	0	0	0	0	1	0	0	0	0	0	0	0	0	0	0	0	0	0	0	0	0	0	0	0	0	0	0	0	0	0	0	0
III	2120533	2120540	0	0	0	0	0	0	0	0	0	0	0	0	0	0	0	0	0	0	0	0	0	0	0	0	0	0	0	0	0	0	0	0	0	0	0	0	0	0	0	0	0	0	0	0	0	0	0
III	2131656	2131663	0	0	0	0	0	0	0	0	0	0	0	0	0	0	0	0	0	0	0	0	0	0	0	0	0	0	0	0	0	0	0	0	0	0	0	0	0	0	0	0	0	0	0	0	0	0	0
III	2131656	2131663	0	0	0	0	0	0	1	0	0	0	0	0	0	0	0	0	0	0	0	0	0	0	0	0	0	0	0	0	0	0	0	0	0	0	0	0	0	0	0	0	0	0	0	0	0	0	0
III	2138013	2138014	1	0	0	0	0	0	0	0	0	0	0	0	0	0	0	0	0	0	0	0	0	0	0	0	0	0	0	0	0	0	0	0	0	0	0	0	0	0	0	0	0	0	0	0	0	0	0
III	2157641	2157642	0	0	0	0	0	0	0	0	0	0	0	0	0	0	0	0	0	0	0	0	0	0	0	0	0	0	0	0	0	0	0	0	0	0	0	0	0	0	0	0	0	0	0	0	0	0	1
III	2178342	2178348	0	0	0	0	0	0	0	0	0	0	0	0	0	0	0	0	0	0	0	0	0	0	0	0	0	0	0	0	0	0	0	0	0	0	0	0	0	0	0	0	0	0	0	0	0	0	0
III	2178400	2178407	0	0	0	0	0	0	0	0	0	0	0	0	0	0	0	0	0	0	0	0	0	0	0	0	0	0	0	0	0	0	0	0	0	0	0	0	0	0	0	0	1	0	0	0	0	0	0
III	2179867	2179868	0	0	0	0	0	0	0	0	0	0	0	0	0	0	0	0	0	0	0	0	0	0	0	1	0	0	0	0	0	0	0	0	0	0	0	0	0	0	0	0	0	0	0	0	0	0	0
III	2180088	2180089	0	0	0	0	1	0	0	0	0	0	0	0	0	0	0	0	0	0	0	0	0	0	0	0	0	0	0	0	0	0	0	0	0	0	0	0	0	0	0	0	0	0	0	0	0	0	0
III	2248318	2248319	0	0	0	0	0	0	0	0	0	0	0	0	0	0	0	0	0	0	0	0	0	0	0	0	0	0	0	0	0	0	0	0	0	0	0	0	0	0	0	0	0	0	0	0	0	0	1
III	2292186	2292187	0	0	0	0	0	0	0	0	0	0	0	0	0	0	0	0	0	0	0	0	0	0	0	0	0	0	0	0	0	0	0	0	0	0	0	0	0	0	0	0	0	1	0	0	0	0	0
III	2300604	2300605	0	0	0	0	0	0	0	0	0	0	0	0	1	0	0	0	0	0	0	0	0	0	0	0	0	0	0	0	0	0	0	0	0	0	0	0	0	0	0	0	0	0	0	0	0	0	0
III	2385769	2385770	0	0	0	0	0	0	0	0	0	0	0	0	0	0	0	0	0	1	0	0	0	0	0	0	0	0	0	0	0	0	0	0	0	0	0	0	0	0	0	0	0	0	0	0	0	0	0
III	2413969	2413970	0	0	0	0	0	0	0	0	0	0	0	0	0	0	0	0	0	0	0	0	0	0	0	0	0	0	0	0	0	0	0	0	0	0	0	0	0	0	0	0	0	1	0	0	0	0	0
III	2417980	2417981	0	0	0	0	0	0	0	0	0	0	0	0	0	0	0	0	0	0	0	1	0	0	0	0	0	0	0	0	0	0	0	0	0	0	0	0	0	0	0	0	0	0	0	0	0	0	0
I	51991	51992	0	0	0	0	0	0	0	0	0	0	0	0	0	0	0	0	0	0	0	0	0	0	0	0	0	0	0	0	0	0	0	0	0	0	0	0	0	0	0	0	1	0	0	0	0	0	1
I	162777	162778	0	0	0	0	0	0	0	0	0	0	0	0	0	0	0	0	0	0	0	0	0	0	0	0	1	0	0	0	0	0	0	0	0	0	0	0	0	0	0	0	0	0	0	0	1	0	0
I	231085	231086	0	0	0	0	0	0	0	0	0	0	0	0	0	0	0	0	0	0	0	0	0	0	0	0	0	0	0	1	0	0	0	0	0	0	0	0	0	0	0	0	0	0	0	0	0	0	0
I	281716	281717	0	0	0	0	0	0	0	0	0	0	0	0	0	0	0	0	0	0	0	0	0	0	0	0	0	0	0	0	0	0	0	0	0	0	0	0	0	0	0	0	1	1	0	0	0	0	0
I	520394	520395	0	0	0	0	0	0	0	0	0	0	0	0	0	0	0	0	0	0	0	0	0	0	0	0	0	0	0	1	0	0	0	0	0	0	0	0	0	0	0	0	1	0	0	0	0	0	0
I	578292	578293	0	0	0	0	0	0	0	0	0	0	0	0	0	0	0	0	0	0	0	0	0	0	0	1	0	0	1	0	0	0	0	0	0	0	0	0	0	0	0	0	0	0	0	0	0	0	0
I	581542	581543	1	1	0	0	0	0	0	0	0	0	0	0	0	0	0	0	0	0	0	0	0	0	0	0	0	0	0	0	0	0	0	0	0	0	0	0	0	0	0	0	0	0	0	0	0	0	0
I	724212	724213	0	0	0	0	0	0	0	1	0	1	0	0	0	0	0	0	0	0	0	0	0	0	0	0	0	0	0	0	0	0	0	0	0	0	0	0	0	0	0	0	0	0	0	0	0	0	0
I	794928	794929	0	0	0	0	0	0	0	1	0	1	0	0	0	0	0	0	0	0	0	0	0	0	0	0	0	0	0	0	0	0	0	0	0	0	0	0	0	0	0	0	0	0	0	0	0	0	0
I	823421	823422	0	0	0	0	1	0	0	0	0	0	0	0	1	0	0	0	0	0	0	0	0	0	0	0	0	0	0	0	0	0	0	0	0	0	0	0	0	0	0	0	0	0	0	0	0	0	0
I	983606	983607	0	0	0	0	0	0	0	0	0	0	0	0	0	0	0	0	0	0	0	0	0	0	0	1	0	0	1	0	0	0	0	0	0	0	0	0	0	0	0	0	0	0	0	0	0	0	0
I	1145434	1145435	0	0	0	0	0	0	0	0	0	0	0	0	0	0	0	0	0	0	0	0	0	0	0	0	0	0	0	0	0	0	0	0	0	0	0	0	0	0	0	0	0	0	1	0	1	0	0
I	1185624	1185625	1	0	0	0	0	0	0	0	0	0	0	0	0	0	0	0	0	0	0	0	0	0	0	0	0	0	0	0	0	0	0	0	0	0	0	0	0	0	0	0	1	0	0	0	0	0	0
I	1258839	1258840	0	0	0	0	0	0	0	0	0	0	0	0	0	0	0	0	0	0	0	0	0	0	0	0	0	0	0	0	0	0	0	0	0	0	0	0	1	0	1	0	0	0	0	0	0	0	0
I	1440630	1440631	0	0	0	0	0	0	0	0	0	0	0	0	0	0	0	0	0	0	0	0	0	0	0	0	0	0	0	0	0	0	0	0	0	0	0	0	0	0	0	0	0	0	0	0	0	0	1
I	1882081	1882086	1	0	0	0	0	0	0	0	0	0	0	0	1	0	0	0	0	0	0	0	0	0	0	0	0	0	0	0	0	0	0	0	0	0	0	0	0	0	0	0	0	0	0	0	0	0	0
I	1897347	1897348	0	0	0	0	0	0	0	0	0	0	0	0	0	0	0	0	0	0	0	1	0	0	0	0	0	0	0	0	0	0	0	0	0	0	0	0	0	0	0	0	0	0	0	0	0	0	0
I	2167010	2167011	0	0	0	0	0	0	0	0	0	0	0	0	1	0	0	0	0	0	0	0	0	0	0	0	0	0	0	0	0	0	0	0	0	0	0	0	0	0	0	0	0	0	0	0	0	0	0
I	2326585	2326586	1	0	0	0	1	0	0	0	0	0	0	0	0	0	0	0	0	0	0	0	0	0	0	0	0	0	0	0	0	0	0	0	0	0	0	0	0	0	0	0	0	0	0	0	0	0	0
I	2380379	2380380	0	0	0	0	0	0	0	0	0	0	0	0	0	0	0	0	0	0	0	0	0	0	0	0	0	0	0	0	0	0	0	0	0	0	0	0	1	0	1	0	0	0	0	0	0	0	0
I	2477766	2477767	0	0	0	0	0	0	0	0	0	0	0	0	0	0	0	0	0	0	0	1	0	0	0	0	1	0	0	0	0	0	0	0	0	0	0	0	0	0	0	0	0	0	0	0	0	0	0
I	2585053	2585054	0	0	0	0	0	0	0	0	0	0	0	0	0	0	0	0	0	0	0	0	0	0	0	1	0	0	1	0	0	0	0	0	0	0	0	0	0	0	0	0	0	0	0	0	0	0	0
I	2628395	2628396	0	0	0	0	0	0	0	0	0	0	0	0	0	0	0	0	0	0	0	0	0	0	0	0	0	0	0	0	0	0	0	0	0	0	0	0	0	0	0	0	0	0	1	0	0	0	0
I	2820913	2820914	0	0	0	0	0	0	0	0	0	0	0	0	0	0	0	0	0	0	0	0	0	0	0	0	0	0	0	1	0	0	0	0	0	0	0	0	0	0	0	0	1	0	0	0	0	0	0
I	2920336	2920342	0	0	0	0	0	0	0	0	0	0	0	0	1	0	0	0	0	0	0	0	0	0	0	0	0	0	0	0	0	0	0	0	0	0	0	0	0	0	0	0	0	0	0	0	0	0	1
I	2926436	2926437	0	0	0	0	0	0	0	0	0	0	0	0	0	0	0	0	0	0	0	0	0	0	0	0	0	0	0	1	0	0	0	0	0	0	0	0	0	0	0	0	1	0	0	0	0	0	0
I	3030739	3030740	0	0	0	0	0	0	0	0	0	0	0	0	0	0	0	1	0	0	0	0	0	0	0	0	0	0	0	0	0	0	0	0	0	0	0	0	0	0	0	0	0	0	0	1	0	0	0
I	3157958	3157959	0	0	0	0	0	0	0	0	0	0	0	0	0	0	1	0	0	0	0	0	0	0	0	0	0	0	0	0	0	0	0	0	0	0	0	0	0	0	0	0	0	0	0	1	0	0	0
I	3361148	3366062	0	0	0	0	0	0	0	0	0	0	1	0	1	0	0	0	0	0	0	0	0	0	0	0	0	0	0	0	0	0	0	0	0	0	0	0	0	0	0	0	0	0	0	0	0	0	0
I	3438800	3438801	0	0	0	0	0	0	0	0	0	0	0	0	1	0	0	0	0	0	0	0	0	0	0	0	0	0	0	0	0	0	0	0	0	0	0	1	0	0	0	0	0	0	0	0	0	0	0
I	3729261	3729262	0	0	0	0	0	0	0	0	0	0	0	0	1	0	0	0	0	0	0	0	0	0	0	0	0	0	0	0	0	0	0	0	0	0	0	0	0	0	0	0	0	0	0	0	0	0	1
I	4394010	4394019	0	0	0	0	0	0	0	0	0	0	0	0	0	0	0	0	0	0	0	0	0	0	0	0	0	0	0	0	0	0	0	0	0	0	0	0	0	0	0	0	0	0	1	0	0	0	0
I	4510028	4510029	0	0	0	0	0	0	0	0	0	0	0	0	0	0	0	0	0	0	0	0	0	1	0	1	0	0	0	0	0	0	0	0	0	0	0	0	0	0	0	0	0	0	0	0	0	0	0
I	4799506	4799507	0	0	0	0	0	0	0	0	0	0	0	0	0	0	0	0	0	0	0	0	0	0	0	0	0	0	0	0	0	0	0	0	0	0	0	0	0	0	0	0	0	1	0	0	0	0	0
I	4916046	4916051	0	0	0	0	0	0	0	0	0	0	0	0	0	0	0	0	0	0	0	0	0	1	0	0	0	0	0	0	0	0	0	0	0	0	0	0	0	0	0	0	0	1	0	0	0	0	0
I	4984128	4984129	0	0	0	0	0	0	0	0	0	0	0	0	1	0	0	1	0	0	0	0	0	0	0	0	0	0	0	0	0	0	0	0	0	0	0	0	0	0	0	0	0	0	0	0	0	0	0
I	5059211	5059212	0	0	0	0	1	0	0	0	0	0	0	0	1	0	0	0	0	0	0	0	0	0	0	0	0	0	0	0	0	0	0	0	0	0	0	0	0	0	0	0	0	0	0	0	0	0	0
I	5122482	5122483	0	0	0	0	0	0	0	0	0	0	0	0	0	0	0	0	0	0	0	0	0	0	0	0	0	0	0	0	0	0	0	0	0	0	0	0	0	0	0	0	0	1	0	0	0	0	0
I	5156103	5156110	0	0	0	0	0	0	0	0	0	0	0	0	0	0	1	0	0	0	0	0	0	0	0	0	0	0	0	0	0	0	0	0	0	0	0	0	0	0	0	0	0	0	0	0	0	0	0
I	5174937	5174938	1	0	0	0	0	0	0	0	0	0	0	0	0	0	0	0	0	0	0	0	0	0	0	0	0	0	0	0	0	0	0	0	0	0	0	0	0	0	0	0	1	0	0	0	0	0	0
I	5443154	5443155	1	0	0	0	0	0	0	0	0	0	0	0	0	0	0	0	0	0	0	0	0	0	0	0	1	0	0	0	0	0	0	0	0	0	0	0	0	0	0	0	0	0	0	0	0	0	0
I	5443524	5443525	0	0	0	0	0	0	1	0	0	0	0	0	0	0	0	0	0	0	0	0	1	0	0	0	0	0	0	0	0	0	0	0	0	0	0	0	0	0	0	0	0	0	0	0	0	0	0
I	5497687	5497688	0	0	0	0	0	0	0	0	0	0	0	0	0	0	0	0	0	0	0	0	0	0	0	1	0	0	1	0	0	0	0	0	0	0	0	0	0	0	0	0	0	0	0	0	0	0	0
II	332295	332296	0	0	0	0	0	0	0	0	0	0	0	0	0	0	1	0	0	0	0	0	0	0	0	0	0	0	0	0	0	0	0	0	0	0	0	0	0	0	0	0	0	0	0	0	0	0	0
II	344541	344550	0	0	0	0	0	0	0	0	0	0	0	0	0	0	0	0	0	0	0	0	0	0	0	0	0	0	0	0	0	0	0	0	0	0	0	0	1	0	1	0	0	0	0	0	0	0	0
II	432561	432562	1	0	0	0	0	1	0	0	0	0	0	0	0	0	0	0	0	0	0	0	0	0	0	0	0	0	0	0	0	0	0	0	0	0	0	0	0	0	0	0	0	0	0	0	0	0	0
II	487885	487886	0	0	0	0	0	0	0	0	0	0	0	0	0	0	0	0	0	0	0	0	0	0	0	0	0	0	0	1	0	0	0	0	0	0	0	0	0	0	0	0	1	0	0	0	0	0	0
II	819977	819978	0	0	0	0	0	0	1	0	0	0	0	0	0	0	0	0	0	0	0	0	0	0	0	0	0	0	0	0	0	0	0	0	0	0	0	0	0	0	0	0	0	0	0	0	0	0	0
II	1095033	1095034	0	0	0	0	0	0	0	0	0	0	0	0	0	0	0	0	0	0	0	0	0	0	0	0	0	0	0	0	0	0	0	0	0	1	0	0	1	0	0	0	0	0	0	0	0	0	0
II	1106115	1106116	0	0	0	0	0	0	0	0	0	0	0	0	0	0	0	0	0	0	0	1	0	0	0	1	0	0	0	0	0	0	0	0	0	0	0	0	0	0	0	0	0	0	0	0	0	0	0
II	1194230	1194231	0	1	0	0	0	0	0	0	0	0	0	0	0	0	0	0	0	0	0	0	0	0	0	0	0	0	0	0	0	0	0	0	0	0	0	0	0	0	0	0	0	0	0	0	0	0	0
II	1208624	1208625	0	0	0	0	0	0	0	0	0	0	0	1	0	0	0	0	0	0	0	0	0	0	0	0	0	0	0	0	0	0	0	0	0	1	0	0	0	0	0	0	0	0	0	0	0	0	0
II	1290333	1290334	0	0	0	0	0	0	0	0	0	0	0	0	1	0	0	0	0	0	0	0	0	0	0	0	0	0	0	0	0	0	0	0	0	0	0	0	0	0	0	0	0	0	1	0	0	0	0
II	1307428	1307429	0	1	0	0	0	0	0	0	0	0	0	0	0	0	0	0	0	0	0	0	0	0	0	0	0	0	0	0	0	0	0	0	0	0	0	0	0	0	0	0	0	0	0	0	0	0	0
II	1348062	1348063	0	0	0	0	1	0	0	0	0	0	0	0	0	0	0	0	0	0	0	0	0	0	0	0	0	0	0	0	0	0	0	0	0	0	0	0	0	0	0	0	0	0	0	0	0	0	0
II	1427546	1427547	0	0	0	0	0	0	0	0	0	0	0	0	0	0	0	0	0	0	0	0	0	1	0	0	0	0	0	0	0	0	0	0	0	0	0	0	0	0	0	0	0	0	0	0	0	0	0
II	1456312	1456313	0	1	0	0	0	0	0	0	0	0	0	0	0	0	0	0	0	0	0	0	0	0	0	0	0	0	0	0	0	0	0	0	0	0	0	0	0	0	0	0	0	0	0	0	0	0	0
II	1699331	1699332	0	0	0	0	0	0	0	0	0	0	0	0	0	0	0	0	0	0	0	0	0	0	0	0	0	0	0	0	0	0	0	0	0	0	0	0	0	0	0	0	0	1	0	0	1	0	0
II	1750360	1750361	0	0	0	0	0	0	0	0	0	1	0	0	0	0	1	0	0	0	0	0	0	0	0	0	0	0	0	0	0	0	0	0	0	0	0	0	0	0	0	0	0	0	0	0	0	0	0
II	2037121	2037122	0	0	0	0	0	0	0	0	0	0	0	0	1	0	0	0	0	0	0	0	0	0	0	0	0	0	0	0	0	0	0	0	0	0	0	0	0	0	0	0	1	0	0	0	0	0	0
II	2085227	2085228	0	0	0	0	0	0	0	0	0	0	0	0	0	0	0	0	0	0	0	0	0	0	0	0	0	0	0	0	0	0	0	0	0	0	0	0	0	0	0	0	0	0	0	1	0	0	0
II	2235893	2235899	0	0	0	0	0	0	0	0	0	0	0	0	0	0	0	0	0	0	0	0	0	1	0	0	0	0	0	0	0	0	0	0	0	0	0	0	0	0	0	0	0	0	1	0	0	0	0
II	2266266	2266267	1	0	0	0	0	0	0	0	0	0	0	0	0	0	0	0	0	0	0	0	0	0	0	0	0	0	0	0	0	0	0	0	0	0	0	0	0	0	0	0	0	0	0	0	0	0	0
II	2357664	2357665	0	0	0	0	0	0	0	0	0	0	0	0	0	0	0	0	0	0	0	0	0	0	0	0	0	0	0	0	0	0	0	0	0	0	0	0	0	0	1	0	0	0	0	0	0	0	0
II	2575531	2575532	0	0	0	0	0	0	0	0	0	0	0	0	0	0	0	0	0	0	0	0	0	0	0	0	1	0	0	0	0	0	0	0	0	0	0	0	0	0	0	0	0	0	0	1	0	0	0
II	2662461	2662462	0	0	0	0	0	1	0	0	0	0	0	0	0	0	0	0	0	0	0	0	0	0	0	0	0	0	0	0	0	0	0	0	0	0	0	0	0	0	0	0	0	0	0	0	0	0	1
II	2759374	2759379	0	0	0	0	0	0	0	0	0	0	0	0	1	0	0	0	0	0	0	0	0	0	0	0	0	0	0	0	0	0	0	0	0	0	0	0	0	0	0	0	0	0	0	0	1	0	0
II	2902686	2902687	0	0	0	0	0	0	0	0	0	0	0	0	0	0	0	0	0	0	0	0	0	1	0	1	0	0	0	0	0	0	0	0	0	0	0	0	0	0	0	0	0	0	0	0	0	0	0
II	2960432	2960433	0	0	0	0	0	0	0	0	0	0	0	0	0	0	0	0	0	0	0	0	0	0	0	0	0	0	0	0	0	0	0	0	0	0	0	0	0	0	0	0	0	0	0	0	0	0	0
II	2962771	2962779	0	0	0	0	0	0	0	0	0	0	0	0	0	0	0	0	0	0	0	0	0	0	0	0	0	0	0	1	0	0	0	0	0	0	0	0	0	0	0	0	0	0	0	0	0	0	1
II	3415934	3415935	0	0	0	0	0	0	0	0	0	0	0	0	0	0	0	1	0	0	0	0	0	0	0	0	0	0	0	0	0	0	0	0	0	0	0	1	0	0	0	0	0	0	0	0	0	0	0
II	3424802	3424803	0	0	0	0	0	0	0	0	0	0	0	0	0	0	0	0	0	1	0	0	0	0	1	0	0	0	0	0	0	0	0	0	0	0	0	0	0	0	0	0	0	0	0	0	0	0	0
II	3461266	3461267	0	0	0	0	0	0	0	0	0	0	0	0	0	0	0	0	0	0	0	0	0	0	0	0	0	0	0	0	0	0	0	0	0	0	0	0	0	0	0	0	0	0	0	0	1	0	0
II	3580010	3580011	0	0	0	0	0	0	0	0	0	0	0	0	0	0	0	0	0	1	0	0	0	0	0	0	0	0	0	0	0	0	0	0	0	0	0	0	0	0	0	0	0	0	0	0	0	0	0
II	3713729	3713730	0	0	0	0	1	0	0	0	0	0	0	0	0	0	0	0	0	0	0	0	0	0	0	0	0	0	0	0	0	0	0	0	0	0	0	0	0	0	0	0	1	0	0	0	0	0	0
II	3934965	3934966	0	0	0	0	0	0	0	0	0	0	0	0	0	0	0	0	0	0	0	0	0	0	0	0	1	0	0	0	0	0	0	0	0	0	0	0	0	0	0	0	0	0	0	0	0	0	0
II	4059363	4059364	0	0	0	0	0	1	0	0	0	0	0	0	0	0	0	0	0	0	0	0	0	0	0	0	0	0	0	0	0	0	0	0	0	0	0	0	0	0	0	0	1	0	0	0	0	0	0
II	4292784	4292785	0	0	0	0	0	0	0	0	0	0	0	0	1	0	0	0	0	0	0	0	0	0	0	0	0	0	0	0	0	0	0	0	0	0	0	0	0	0	0	0	0	0	0	0	0	0	1
II	4357245	4357246	0	0	0	0	0	0	0	0	0	0	0	0	0	0	0	0	0	0	0	0	0	0	0	0	0	0	0	0	0	0	0	0	0	0	0	0	0	0	0	0	0	0	0	0	0	0	0
III	60955	60956	0	0	0	0	0	0	0	0	0	0	0	0	0	0	0	0	0	0	0	0	0	0	0	0	1	0	0	0	0	0	0	0	0	0	0	0	0	0	0	0	0	1	0	0	0	0	0
III	144244	144245	0	0	0	0	0	0	0	0	0	0	0	0	1	0	0	0	0	0	0	0	0	0	0	0	0	0	0	0	0	0	0	0	0	0	0	0	0	0	0	0	0	0	0	0	0	0	0
III	319810	319811	0	0	0	0	0	1	0	0	0	0	0	0	1	0	0	0	0	0	0	0	0	0	0	0	0	0	0	0	0	0	0	0	0	0	0	0	0	0	0	0	0	0	0	0	0	0	0
III	346606	346611	0	0	0	0	0	1	0	0	0	0	0	0	0	0	1	0	0	0	0	0	0	0	0	0	0	0	0	0	0	0	0	0	0	0	0	0	0	0	0	0	0	0	0	0	0	0	0
III	347643	347644	0	0	0	0	0	0	0	0	0	0	0	0	0	0	0	0	1	0	0	0	0	0	0	0	0	0	0	0	0	0	0	0	0	0	0	0	0	0	0	0	0	1	0	0	0	0	0
III	531232	531233	1	0	0	0	0	0	0	0	0	0	0	0	1	0	0	0	0	0	0	0	0	0	0	0	0	0	0	0	0	0	0	0	0	0	0	0	0	0	0	0	0	0	0	0	0	0	0
III	552354	552355	0	0	0	0	0	0	0	0	0	0	0	0	0	0	0	0	0	0	0	0	0	0	0	1	0	0	1	0	0	0	0	0	0	0	0	0	0	0	0	0	0	0	0	0	0	0	0
III	678074	678075	0	0	0	0	0	0	0	0	0	0	0	0	0	0	0	0	0	0	0	0	0	0	0	0	0	0	0	0	0	0	0	0	0	0	0	0	0	0	0	0	0	0	0	0	0	0	0
III	717393	717394	0	0	0	0	0	0	0	0	0	0	0	0	0	0	0	0	0	0	0	0	0	0	0	0	0	0	0	0	0	0	0	0	0	0	0	0	0	0	0	0	0	1	0	0	0	0	0
III	756653	756654	0	0	0	0	0	1	0	0	0	0	0	0	1	0	0	0	0	0	0	0	0	0	0	0	0	0	0	0	0	0	0	0	0	0	0	0	0	0	0	0	0	0	0	0	0	0	0
III	896996	896997	0	0	0	0	0	0	1	0	0	0	0	0	0	0	0	0	0	0	0	0	0	0	0	0	0	0	0	0	0	0	0	0	0	0	0	0	0	0	0	0	0	0	0	0	0	0	0
III	972612	972619	0	0	0	0	0	0	0	0	0	0	0	0	0	0	0	0	0	0	0	0	0	0	0	0	0	0	0	0	0	0	0	0	0	0	0	0	0	0	0	0	0	0	0	0	0	0	0
III	1029452	1029457	0	0	0	0	1	0	0	0	0	0	0	0	0	0	0	0	0	0	0	0	0	0	0	0	0	0	0	1	0	0	0	0	0	0	0	0	0	0	0	0	0	0	0	0	0	0	0
III	1399003	1399004	1	0	0	0	0	0	0	0	0	0	0	0	0	0	0	0	0	0	0	0	0	0	0	0	0	0	0	1	0	0	0	0	0	0	0	0	0	0	0	0	0	0	0	0	0	0	0
III	1502402	1502403	1	0	0	0	0	0	0	0	0	0	0	0	0	0	0	0	0	0	0	0	0	0	0	0	0	0	0	0	0	0	0	0	0	0	0	0	0	0	0	0	0	0	0	0	0	0	0
III	1513702	1513703	0	0	0	0	0	0	0	0	0	0	0	0	0	0	0	0	0	0	0	0	0	0	0	0	0	0	0	0	0	0	0	0	0	0	0	0	0	0	0	0	0	0	0	0	0	0	0
III	1630130	1630135	0	0	1	0	0	0	0	0	0	0	0	0	0	0	0	0	0	0	0	0	0	0	0	0	0	0	0	0	0	0	0	0	0	0	0	0	0	0	0	0	0	0	0	0	0	0	1
III	1704874	1704882	0	0	0	0	0	1	0	0	0	0	0	0	0	0	0	0	0	0	0	0	0	0	0	0	0	0	0	0	0	0	0	0	0	0	0	0	0	0	0	0	0	0	0	0	0	0	0
III	1705010	1705015	0	0	0	0	0	0	0	0	0	0	0	0	0	0	0	0	0	0	0	0	1	0	0	0	0	1	0	0	0	0	0	0	0	0	0	0	0	0	0	0	0	0	0	0	0	0	0
III	1748110	1748111	0	0	0	0	0	0	0	0	0	0	0	0	0	0	0	0	0	0	0	0	0	0	0	1	0	0	0	0	0	0	0	0	0	0	0	0	0	0	0	0	0	0	0	0	0	0	0
III	1800698	1800703	0	0	0	0	0	0	0	0	0	0	0	0	0	0	0	0	0	0	1	0	0	0	0	0	0	0	0	0	0	0	0	0	0	0	0	0	0	0	0	0	0	0	0	0	0	0	0
III	1848019	1848020	0	0	0	0	0	0	0	0	0	0	0	0	0	0	0	0	0	0	0	0	0	0	0	0	0	0	0	0	0	0	0	0	0	0	0	0	0	0	0	0	0	0	0	0	0	0	0
III	1854633	1854634	0	0	0	0	1	0	0	0	0	0	0	0	0	0	0	0	0	1	0	0	0	0	0	0	0	0	0	0	0	0	0	0	0	0	0	0	0	0	0	0	0	0	0	0	0	0	0
III	1983043	1983048	0	0	1	0	0	0	0	0	0	0	0	1	0	0	0	0	0	0	0	0	0	0	0	0	0	0	0	0	0	0	0	0	0	0	0	0	0	0	0	0	0	0	0	0	0	0	0
III	1983125	1983132	0	0	0	0	0	0	0	0	0	0	0	0	0	0	0	0	0	0	0	0	0	0	0	0	1	0	0	0	0	0	0	0	0	0	0	0	0	0	0	0	0	0	0	0	0	0	0
III	2086026	2086027	0	0	0	0	0	0	0	0	0	0	0	0	0	0	0	0	0	0	0	0	0	0	0	0	0	0	0	0	0	0	0	0	0	0	0	0	0	0	0	0	1	1	0	0	0	0	0
III	2099585	2099591	0	0	0	0	0	0	0	0	0	0	0	0	0	0	0	0	0	0	0	0	0	0	0	0	0	0	0	0	0	0	0	0	0	0	0	0	0	0	0	0	1	0	0	0	0	0	0
III	2183087	2183088	0	0	0	0	0	0	0	0	0	0	0	0	0	0	0	0	0	0	0	0	0	0	0	0	0	0	1	0	0	0	0	0	0	0	0	0	1	0	0	0	0	0	0	0	0	0	0
III	2183518	2183519	1	0	0	0	0	0	0	0	0	0	0	0	0	0	0	0	0	0	0	0	0	0	0	0	0	0	0	0	0	0	0	0	0	0	0	0	0	0	0	0	0	0	0	0	0	0	0
III	2296255	2296256	0	0	0	0	0	0	0	0	0	0	0	0	0	0	0	0	0	0	0	0	0	0	0	0	0	0	0	1	0	0	0	0	0	0	0	0	0	0	0	0	1	0	0	0	0	0	0
III	2302371	2302372	0	0	0	0	0	0	0	0	0	0	0	0	1	0	0	0	0	0	0	0	0	0	0	0	0	0	0	0	0	0	0	0	0	0	0	0	0	0	0	0	0	0	0	0	1	0	0
III	2310100	2310101	0	0	0	0	0	0	0	0	0	0	0	0	0	0	0	0	0	0	1	0	0	0	0	0	0	0	1	0	0	0	0	0	0	0	0	0	0	0	0	0	0	0	0	0	0	0	0
III	2354610	2354611	0	0	0	0	0	1	0	0	0	0	0	0	0	0	0	0	0	0	0	0	0	0	0	0	0	0	0	0	0	0	0	0	0	0	0	0	0	0	0	0	0	0	0	0	0	0	0
I	633658	633659	0	0	0	0	0	0	0	0	0	0	0	0	0	0	0	0	1	0	0	0	0	0	0	0	0	0	0	0	0	0	0	0	0	0	0	0	0	0	0	0	0	1	0	0	0	0	1
I	678402	678403	0	0	0	0	0	0	0	1	0	1	0	0	0	0	0	0	0	0	0	0	0	0	0	0	0	0	0	0	0	0	0	0	0	0	0	0	0	0	0	0	1	0	0	0	0	0	0
I	767358	767359	0	0	0	0	0	0	0	0	1	1	0	0	1	0	0	0	0	0	0	0	0	0	0	0	0	0	0	0	0	0	0	0	0	0	0	0	0	0	0	0	0	0	0	0	0	0	0
I	1493963	1493969	0	0	0	0	0	0	0	1	1	1	0	0	0	0	0	0	0	0	0	0	0	0	0	0	0	0	0	0	0	0	0	0	0	0	0	0	0	0	0	0	0	0	0	0	0	0	0
I	1811431	1811432	0	1	0	0	0	0	0	0	0	0	0	0	0	0	0	0	0	0	0	0	0	0	1	0	0	0	0	0	0	0	0	0	0	0	0	0	0	0	0	0	0	0	0	0	0	0	0
I	1921414	1921415	0	1	0	0	0	0	0	0	0	0	0	0	0	0	0	0	0	0	0	0	0	0	0	0	0	0	0	1	0	0	0	0	0	0	0	0	0	0	0	0	0	0	1	0	0	0	0
I	2937434	2937435	0	0	0	0	0	0	0	0	0	1	0	0	0	0	0	0	0	0	0	0	0	0	0	0	0	0	0	0	0	0	0	0	0	0	0	0	0	0	0	0	1	0	0	0	0	0	0
I	3076812	3076813	0	0	0	0	0	0	0	0	0	0	0	0	1	0	1	0	0	0	0	0	0	0	0	0	0	0	0	0	0	0	0	0	0	0	0	0	0	0	0	0	0	0	0	1	0	0	0
I	3319078	3319084	0	0	0	0	0	0	0	0	0	0	0	0	0	0	0	0	0	0	0	0	0	0	0	0	0	0	0	0	0	0	0	0	0	0	0	0	0	0	0	0	1	1	0	0	0	0	0
I	3664548	3664549	0	0	0	0	0	0	0	0	0	0	0	0	0	0	0	0	0	0	0	0	0	0	0	0	0	0	0	0	0	0	0	0	0	1	0	0	0	0	0	0	0	0	0	1	1	0	0
I	4477389	4477390	0	0	0	0	0	0	0	0	0	0	0	0	1	0	0	0	0	0	0	1	0	0	0	0	0	0	0	0	0	0	0	0	0	0	0	0	0	0	0	0	0	0	0	0	0	0	0
I	5525905	5525906	0	0	0	0	0	0	0	1	1	1	0	0	0	0	0	0	0	0	0	0	0	0	0	0	0	0	0	0	0	0	0	0	0	0	0	0	0	0	0	0	0	0	0	0	0	0	0
II	129897	129898	0	0	0	0	0	0	0	0	0	0	0	0	0	0	0	0	0	0	1	0	0	0	0	0	0	0	0	0	0	0	0	0	0	0	0	0	0	0	0	0	0	1	0	0	0	0	1
II	165403	165404	0	0	0	0	0	0	0	0	0	0	0	0	0	0	0	1	0	0	0	0	0	0	0	0	0	0	0	0	0	0	0	0	0	0	0	0	0	0	0	0	1	0	0	0	0	0	0
II	206416	206424	0	0	0	0	0	1	0	0	0	0	0	0	0	0	0	0	1	0	0	0	0	0	0	0	0	0	0	0	0	0	0	0	0	0	0	0	0	0	0	0	0	0	0	0	1	0	0
II	494602	494603	0	0	0	0	0	1	0	0	0	0	0	0	0	0	0	0	0	0	0	0	0	1	0	0	0	0	0	0	0	0	0	0	0	0	0	0	0	0	0	0	0	0	0	0	0	0	0
II	1146755	1146756	0	0	0	0	0	0	0	1	0	1	0	0	0	0	0	0	0	0	0	0	0	0	0	0	0	0	0	0	0	0	0	0	0	0	0	1	0	0	0	0	0	0	0	0	0	0	0
II	1167422	1167423	0	1	0	0	0	0	0	0	0	0	0	0	0	0	0	0	0	0	0	0	0	0	0	0	0	0	1	0	0	0	0	0	0	0	0	0	0	0	0	0	0	0	0	0	0	0	0
II	1812349	1817262	0	0	0	0	0	0	0	0	0	0	1	0	0	0	0	0	0	0	0	0	0	0	0	0	0	0	0	0	0	0	0	0	0	0	0	0	0	1	0	0	0	0	0	0	0	0	0
II	2254170	2254171	0	1	0	0	0	0	0	0	0	0	0	0	0	0	0	1	0	0	0	0	0	0	0	0	0	0	0	0	0	0	0	0	0	0	0	0	0	0	0	0	0	0	0	0	0	0	0
II	2307175	2307176	0	0	0	0	0	1	0	0	0	0	0	0	1	0	0	0	0	0	0	0	0	0	0	0	0	0	0	0	0	0	0	0	0	0	0	0	0	0	0	0	0	0	0	0	0	0	0
II	2819703	2819704	0	0	0	0	0	0	0	0	0	0	0	0	0	0	0	0	0	0	0	0	0	0	0	0	0	0	0	0	0	0	0	0	0	0	0	0	1	0	1	0	0	0	0	0	0	0	0
II	3245009	3245014	0	0	0	0	0	0	1	0	0	0	0	0	0	0	0	0	0	0	0	0	0	0	0	0	0	0	0	0	0	0	0	0	0	0	0	0	0	0	0	0	0	1	0	0	0	0	0
II	3818157	3818158	0	0	0	0	0	0	0	0	0	0	0	0	0	0	0	0	0	0	1	1	0	0	0	0	0	0	1	0	0	0	0	0	0	0	0	0	0	0	0	0	0	0	0	0	0	0	0
II	4189133	4189134	0	0	0	0	0	0	0	0	0	0	0	0	1	0	0	0	0	0	0	0	0	0	0	0	0	0	0	0	0	0	0	0	0	0	0	0	0	0	0	0	0	1	1	0	0	0	0
II	4484459	4484460	0	0	0	0	0	0	0	1	1	1	0	0	0	0	0	0	0	0	0	0	0	0	0	0	0	0	0	0	0	0	0	0	0	0	0	0	0	0	0	0	0	0	0	0	0	0	0
III	172498	172499	0	0	0	0	0	0	0	0	0	0	0	0	0	0	0	0	0	0	1	0	0	1	0	1	0	0	0	0	0	0	0	0	0	0	0	0	0	0	0	0	0	0	0	0	0	0	0
III	320269	320270	0	0	0	0	0	0	0	0	0	0	0	0	0	0	0	0	1	0	0	0	0	0	0	0	0	0	0	0	0	0	0	0	0	0	0	0	0	0	0	0	0	0	1	0	1	0	0
III	353183	353184	0	0	0	0	1	0	0	0	0	0	0	0	0	0	0	0	0	0	0	1	0	0	0	1	0	0	0	0	0	0	0	0	0	0	0	0	0	0	0	0	0	0	0	0	0	0	0
III	381494	381495	0	0	0	0	0	0	0	0	0	0	0	0	0	0	1	0	0	0	0	0	0	0	0	0	1	0	0	1	0	0	0	0	0	0	0	0	0	0	0	0	0	0	0	0	0	0	0
III	397222	397223	0	0	0	0	0	0	0	0	0	0	0	0	0	0	0	0	0	0	0	0	0	0	0	0	0	0	0	0	0	0	0	0	0	0	0	0	0	0	0	0	0	1	0	0	0	0	0
III	615400	615401	0	0	0	0	0	0	0	0	0	0	0	1	0	0	0	0	0	0	0	0	0	0	0	0	0	0	0	0	0	0	0	0	0	0	0	0	0	0	0	0	0	0	0	0	0	0	0
III	763101	763102	0	0	0	0	1	0	0	0	0	0	0	0	0	0	0	0	0	0	0	0	0	0	0	0	0	0	0	0	0	0	0	0	0	0	0	0	0	1	0	0	0	0	0	0	0	0	0
III	927323	927324	0	0	0	0	0	0	0	0	0	0	0	0	0	0	1	0	0	0	0	0	0	0	0	0	0	0	0	0	0	1	1	0	0	0	0	0	0	0	0	0	0	0	0	0	0	0	0
III	1039972	1039987	0	0	0	0	0	0	0	1	1	1	0	0	0	0	0	0	0	0	0	0	0	0	0	0	0	0	0	0	0	0	0	0	0	0	0	0	0	0	0	0	0	0	0	0	0	0	0
III	1616269	1616270	0	0	0	0	0	0	0	0	0	0	0	0	0	0	0	0	0	0	1	0	0	1	0	1	0	0	0	0	0	0	0	0	0	0	0	0	0	0	0	0	0	0	0	0	0	0	0
III	1789453	1789454	0	0	0	0	1	0	0	0	0	0	0	0	0	0	0	0	0	0	0	0	0	1	1	0	0	0	0	0	0	0	0	0	0	0	0	0	0	0	0	0	0	0	0	0	0	0	0
III	1863601	1863602	0	0	0	0	0	0	0	0	0	0	0	0	0	0	0	0	0	0	0	0	1	0	1	0	0	1	0	0	0	0	0	0	0	0	0	0	0	0	0	0	0	0	0	0	0	0	0
I	436119	436120	0	0	0	0	0	0	0	0	0	0	0	0	0	0	0	0	0	0	1	0	0	1	0	1	0	0	1	0	0	0	0	0	0	0	0	0	0	0	0	0	0	0	0	0	0	0	0
I	1129316	1129350	0	1	0	0	0	0	0	0	0	0	0	0	0	0	0	0	0	0	0	0	0	0	0	0	0	0	0	0	0	0	0	0	0	0	0	0	0	0	0	0	0	0	0	0	0	0	1
I	4106284	4106285	0	1	0	0	0	0	0	0	0	0	0	0	1	0	1	0	0	0	0	0	0	0	0	0	0	0	0	0	0	0	0	0	0	0	0	0	0	0	1	0	0	0	0	0	0	0	0
I	4994821	4994822	0	0	0	0	0	0	1	0	0	0	0	0	0	0	0	0	0	0	0	0	0	0	0	0	0	0	0	0	0	0	0	0	0	0	0	0	0	0	0	0	0	1	0	0	0	0	1
I	5064447	5064448	0	0	0	0	0	1	0	0	0	0	0	0	1	0	1	0	0	0	0	0	0	0	0	0	0	0	0	0	0	0	0	0	0	0	0	0	0	0	0	0	0	0	0	0	0	0	0
I	5190745	5200227	0	0	0	0	0	0	0	0	0	0	1	0	0	1	0	0	0	0	0	0	0	0	0	0	0	0	0	0	0	0	0	0	0	0	0	0	1	0	1	0	0	0	0	0	0	0	0
II	464987	464988	0	0	0	0	0	0	0	1	0	1	0	0	0	0	0	1	0	0	0	1	0	0	0	0	0	0	0	0	0	0	0	0	0	0	0	0	0	0	0	0	0	0	0	0	0	0	0
II	1085454	1085455	0	0	0	0	0	0	0	0	0	0	0	0	0	0	0	0	0	0	1	0	0	1	0	0	0	0	1	0	0	0	0	0	0	0	0	0	0	0	0	0	0	1	0	0	0	0	0
II	1436136	1436142	0	1	0	0	0	0	0	0	0	0	0	0	0	0	1	0	1	0	0	0	0	0	0	0	0	0	0	0	0	0	0	0	0	0	0	0	0	0	0	0	0	0	0	0	0	0	0
II	1527167	1527168	0	0	0	0	0	0	0	0	0	0	0	0	0	0	0	0	0	0	1	0	0	1	0	1	0	0	1	0	0	0	0	0	0	0	0	0	0	0	0	0	0	0	0	0	0	0	0
II	1576005	1576011	0	0	0	0	0	0	0	0	0	0	0	0	0	0	0	0	0	0	1	0	0	1	0	1	0	0	1	0	0	0	0	0	0	0	0	0	0	0	0	0	0	0	0	0	0	0	0
II	1751799	1751800	0	0	0	0	0	0	0	0	0	0	0	0	0	0	0	0	0	0	1	1	0	1	0	0	1	0	0	0	0	0	0	0	0	0	0	0	0	0	0	0	0	0	0	0	0	0	0
II	1905580	1905586	0	0	0	0	0	0	0	0	0	0	0	0	0	0	0	0	0	0	0	0	0	0	0	0	0	0	0	0	0	0	0	0	0	0	0	0	1	0	0	0	0	1	0	0	0	0	0
II	2224912	2224913	0	0	0	0	0	0	1	0	1	1	0	0	0	0	0	0	0	0	0	0	0	0	0	0	0	0	1	0	0	0	0	0	0	0	0	0	0	0	0	0	0	0	0	0	0	0	0
II	2640164	2640165	0	0	0	0	0	0	0	0	0	0	0	0	0	0	0	0	0	0	0	0	0	0	0	0	0	0	0	1	0	0	0	0	0	0	0	0	1	0	1	0	0	0	0	0	0	0	0
II	3085442	3085448	0	1	0	0	0	0	0	0	0	0	0	0	0	0	0	0	0	0	0	0	0	0	0	0	0	0	0	1	0	0	0	0	0	0	0	0	0	0	0	0	0	0	0	0	0	0	0
II	3303246	3303247	0	0	0	0	0	0	0	0	0	0	0	0	0	0	0	0	0	0	1	0	0	1	0	1	0	0	1	0	0	0	0	0	0	0	0	0	0	0	0	0	0	0	0	0	0	0	0
II	3517343	3517344	1	0	0	0	0	0	0	0	0	0	0	0	0	0	0	0	0	0	0	0	0	0	0	0	0	0	0	0	0	0	0	0	0	1	0	0	0	0	0	0	1	0	0	0	0	0	0
II	3537051	3537052	0	0	0	0	0	0	0	0	0	0	0	0	0	0	0	0	0	0	1	0	0	1	0	1	0	0	1	0	0	0	0	0	0	0	0	0	0	0	0	0	0	0	0	0	0	0	0
II	3962475	3962476	0	0	0	0	0	0	0	0	0	0	0	0	0	0	0	0	0	0	0	0	0	0	0	0	0	0	0	0	0	0	0	0	0	0	0	0	0	0	0	0	1	1	1	0	1	0	0
II	4120823	4120824	0	0	0	0	0	0	0	0	0	0	0	0	1	0	0	0	0	0	0	1	0	0	0	0	0	0	1	0	0	0	0	0	0	0	0	0	0	0	0	0	0	0	0	0	0	0	0
III	218753	218754	0	0	0	0	0	0	0	0	0	0	0	0	0	0	0	0	1	0	0	0	0	0	0	0	0	0	0	0	0	0	0	0	0	0	0	0	1	0	0	0	0	0	1	0	0	0	0
III	1401348	1401349	0	0	0	0	0	0	0	0	0	0	0	0	1	0	0	0	0	1	0	1	0	0	0	0	0	0	0	0	0	0	0	0	0	0	0	0	0	0	0	0	0	0	0	0	0	0	0
III	1674251	1674252	0	0	0	1	0	0	0	0	0	0	0	0	0	0	0	0	0	0	0	0	0	0	0	1	0	0	0	0	0	0	0	0	0	0	0	0	0	0	1	0	0	1	0	0	0	0	0
III	1827495	1827496	0	0	0	0	0	1	0	0	0	0	0	0	1	0	0	0	0	0	0	0	0	1	0	1	0	0	0	0	0	0	0	0	0	0	0	0	0	0	0	0	0	0	0	0	0	0	0
III	1932074	1932075	1	0	0	0	0	1	0	0	0	0	0	0	0	0	0	0	0	0	0	0	0	0	0	0	0	0	0	0	0	0	0	0	0	0	0	0	0	0	0	0	1	0	0	0	0	0	0
III	2007983	2007984	0	0	0	0	0	1	1	0	0	0	0	0	0	0	0	0	0	0	0	0	0	0	0	0	0	0	0	0	0	0	0	0	0	0	0	0	0	0	0	0	0	0	0	0	1	0	0
III	2159341	2159342	0	0	0	0	0	0	1	0	0	0	0	0	0	0	1	0	0	0	0	0	0	0	0	0	0	0	0	0	0	0	0	0	0	0	0	0	0	0	0	0	0	0	0	1	1	0	0
III	2370748	2370749	1	0	0	0	0	0	0	0	0	0	0	0	0	0	0	0	0	0	0	0	0	0	0	0	0	0	0	0	0	0	0	0	0	0	0	0	0	0	0	0	0	0	0	0	0	0	1
I	240508	240509	1	0	0	0	0	0	0	0	0	0	0	0	0	0	0	0	1	0	0	0	0	0	0	0	0	0	0	0	0	0	0	0	0	0	0	0	0	0	0	0	0	0	1	0	0	0	1
I	414910	414911	0	0	0	0	0	0	0	0	0	0	0	0	0	0	0	0	0	0	0	1	0	0	0	0	0	0	0	0	0	0	0	0	0	1	0	0	0	0	0	0	0	1	1	0	0	0	0
I	1315910	1315911	0	0	0	0	0	0	0	1	1	1	0	0	0	0	0	0	1	0	0	0	0	0	0	0	0	0	0	0	0	0	0	0	0	0	0	0	0	0	0	0	0	0	0	0	0	0	0
I	1465332	1470247	0	0	0	0	0	0	0	0	0	0	1	0	0	1	0	0	0	0	0	0	0	0	0	0	0	0	0	0	0	0	0	0	0	0	0	0	0	0	0	0	0	0	0	0	0	0	0
I	2979776	2979777	0	0	0	0	0	0	0	0	0	0	0	0	0	0	0	0	0	0	1	1	0	1	0	1	0	0	0	0	0	0	0	0	0	0	0	0	0	0	0	0	0	0	0	0	1	0	0
I	3143843	3143844	0	0	0	0	0	0	0	0	0	0	0	0	0	0	0	0	0	0	1	1	0	1	0	1	0	0	1	0	0	0	0	0	0	0	0	0	0	0	0	0	0	0	0	0	0	0	0
I	3927349	3927350	0	0	0	0	0	0	0	0	0	0	0	0	0	0	0	0	0	0	1	1	0	1	0	1	0	0	1	0	0	0	0	0	0	0	0	0	0	0	0	0	0	0	0	0	0	0	0
I	3986434	3986435	0	0	0	0	0	0	0	0	0	0	0	0	0	0	0	0	0	0	1	1	0	1	0	1	0	0	1	0	0	0	0	0	0	0	0	0	0	0	0	0	0	0	0	0	0	0	0
I	4365552	4365553	1	0	0	0	0	0	0	0	0	1	0	0	0	0	0	0	0	0	0	0	0	0	0	0	0	0	0	0	0	0	0	0	0	0	0	0	0	0	0	0	1	0	0	0	0	0	1
II	1200449	1200450	0	0	0	0	0	1	0	0	0	0	0	0	0	0	1	0	0	0	0	0	0	0	0	0	0	0	0	0	0	0	0	0	0	0	0	0	0	0	0	0	0	0	0	0	0	0	0
II	1354295	1354296	0	0	0	0	0	1	0	0	0	0	0	0	0	0	0	0	0	0	1	0	0	1	0	1	0	0	1	0	0	0	0	0	0	0	0	0	0	0	0	0	0	0	0	0	0	0	0
II	3020092	3020093	0	0	0	0	1	1	0	0	0	0	0	0	1	0	0	0	0	0	0	0	0	0	0	0	0	0	0	0	0	0	0	0	0	0	0	0	0	0	0	0	0	0	0	1	1	0	0
II	3551256	3551257	1	0	0	0	0	0	0	0	0	0	0	0	0	0	0	0	0	0	0	0	0	0	0	0	0	0	0	0	0	0	0	0	0	1	0	0	0	0	0	0	1	0	0	0	0	0	0
III	120122	120123	0	1	0	0	0	0	0	0	0	0	0	0	1	0	0	0	0	0	0	0	0	0	0	0	0	0	0	1	0	0	0	0	0	0	0	0	1	0	1	0	0	0	0	0	0	0	0
III	225913	225914	0	0	0	0	0	0	0	0	0	0	0	0	0	0	0	0	0	0	1	1	0	1	0	1	0	0	0	0	0	0	0	0	0	0	0	0	0	0	0	0	0	1	0	0	0	0	0
III	1238327	1238328	0	0	0	0	0	0	0	1	1	1	0	0	1	0	0	0	0	0	0	0	0	0	0	0	0	0	0	0	0	0	0	0	0	0	0	0	0	0	0	0	0	0	0	0	0	0	0
I	1529895	1529906	0	0	0	0	0	0	0	1	1	1	0	0	0	0	0	1	0	0	0	0	0	0	0	0	0	0	0	0	0	0	0	0	0	0	0	0	0	0	0	0	0	0	1	1	0	0	0
I	3891339	3891340	0	0	0	0	0	0	0	0	0	0	0	0	0	0	0	0	0	0	1	1	0	1	0	1	0	0	1	0	0	0	0	0	0	0	0	0	0	0	0	0	0	1	0	0	0	0	0
I	3996024	4000939	0	0	0	0	1	0	0	0	0	0	1	0	0	0	0	0	0	0	0	0	0	0	0	0	0	0	0	0	0	0	0	1	0	0	0	0	0	1	0	0	0	0	0	0	0	0	0
III	488926	488927	0	0	0	0	0	1	0	1	0	0	0	0	0	0	1	0	0	0	0	0	0	0	0	0	0	0	0	1	0	0	0	0	0	0	0	0	0	0	0	0	0	1	0	0	0	0	0
III	565002	565003	0	1	0	0	0	0	0	0	0	0	0	0	0	0	1	0	0	0	0	0	0	0	0	0	0	0	0	0	0	0	0	0	0	0	0	0	1	0	1	0	0	0	0	0	0	0	0
I	650438	650439	0	0	0	0	0	1	0	0	0	0	0	0	0	0	0	0	1	0	0	0	0	0	0	0	0	0	0	0	0	0	0	0	0	1	0	1	0	0	1	1	0	0	0	0	0	0	0
I	2330724	2330731	1	0	0	0	0	0	0	0	0	1	0	0	1	0	0	0	0	0	0	0	0	0	0	0	0	0	0	0	0	0	0	0	0	0	0	0	0	0	0	0	1	0	1	0	0	0	1
I	2926805	2931720	0	0	0	0	1	0	0	0	0	0	1	0	0	1	1	0	0	0	0	0	0	0	0	0	0	0	0	0	0	0	0	0	0	0	0	0	0	0	0	0	0	0	0	0	0	0	0
I	4014160	4014161	0	0	1	0	0	0	0	0	0	1	0	0	1	0	0	0	0	0	0	0	0	0	0	0	0	0	0	0	1	0	0	0	0	0	0	0	0	0	0	0	0	0	0	0	0	0	1
I	5221636	5221637	0	0	0	0	0	0	1	0	0	0	0	0	0	0	0	1	0	0	0	0	0	0	0	0	0	0	0	0	0	0	0	0	0	0	0	0	1	0	1	0	0	0	0	1	0	0	0
II	1964875	1969789	0	0	0	0	0	0	0	0	0	0	1	0	0	0	0	0	0	0	0	0	0	0	0	0	0	0	0	0	0	1	1	0	0	1	1	0	0	0	0	0	0	1	0	0	0	0	0
III	269956	269957	1	0	0	0	0	0	0	0	0	0	0	0	0	0	0	0	1	0	0	0	0	0	0	0	0	0	0	0	0	0	0	0	0	0	0	0	0	0	0	0	1	0	0	0	0	0	1
III	964942	964943	0	0	0	0	0	0	0	0	0	0	0	0	0	0	0	0	0	0	1	1	0	1	0	1	0	0	1	0	0	0	0	0	0	0	0	0	0	0	0	0	0	0	0	1	1	0	0
III	1822855	1822856	0	1	0	0	1	1	0	0	0	0	0	1	0	0	0	0	1	0	0	0	0	0	0	0	0	0	0	0	0	0	0	0	0	1	0	0	0	0	0	0	0	0	0	0	0	0	0
III	1876068	1876075	0	0	0	0	0	0	0	0	0	0	0	0	0	0	0	0	1	0	0	1	0	1	0	1	0	0	1	0	0	0	0	0	0	0	0	0	0	0	0	0	1	0	0	0	0	0	0
III	1959601	1959602	0	0	0	0	0	0	1	0	0	0	0	0	0	0	0	0	0	0	0	1	0	0	0	0	0	0	0	1	0	1	1	0	0	0	0	0	0	0	0	0	0	1	0	1	0	0	0
III	2059798	2059799	0	0	0	0	0	1	1	0	0	0	0	0	0	0	0	0	1	0	0	1	0	0	0	0	0	0	0	0	0	0	0	0	0	0	0	0	0	0	0	0	0	1	0	1	1	0	0
III	2401858	2401859	0	0	1	0	0	1	0	0	0	0	0	0	0	0	0	0	0	0	0	1	0	0	0	0	0	0	0	1	0	0	0	0	0	0	0	0	0	0	0	0	1	0	0	0	1	0	0
I	2063879	2063880	0	1	0	0	0	0	1	0	0	1	0	0	0	0	1	0	0	0	0	0	0	0	0	0	0	0	0	1	0	0	0	0	0	0	0	0	0	0	0	0	0	1	1	1	0	0	0
I	4515382	4515383	0	0	0	0	0	1	0	0	0	0	0	1	0	0	0	0	0	0	0	0	0	0	0	0	0	0	0	0	0	1	1	0	0	1	0	0	0	0	0	0	0	1	0	0	1	0	0
III	937200	937201	1	0	1	1	0	0	0	0	0	0	0	0	0	0	0	0	0	0	0	0	0	0	0	0	0	0	0	0	0	0	0	0	0	0	0	1	0	0	0	1	0	0	0	0	0	0	0
I	2939543	2939544	0	1	0	1	0	0	0	0	0	0	0	0	0	0	1	0	0	0	0	0	0	0	0	0	0	0	0	0	0	0	0	0	0	1	0	0	0	0	0	1	0	1	1	0	1	0	0
I	4021977	4026892	0	0	0	0	1	0	0	0	0	1	1	0	0	1	0	0	0	0	0	0	0	0	0	0	0	0	0	0	0	0	0	0	0	0	0	0	0	1	0	0	0	0	0	0	0	0	0
II	717618	717619	0	1	0	0	1	0	0	0	0	0	0	0	0	0	0	0	0	0	0	0	0	1	0	0	0	1	0	0	0	0	0	0	0	0	0	0	0	0	0	0	0	1	0	1	0	0	1
I	3993662	3993663	1	0	0	0	0	0	1	0	0	0	0	0	0	0	0	0	1	0	1	1	0	1	0	1	0	0	1	0	0	0	0	0	0	0	0	0	0	0	0	0	0	0	0	1	1	0	0
I	4506961	4506962	0	1	0	0	0	1	0	0	0	1	0	0	0	0	1	0	0	0	0	0	0	0	0	0	0	0	0	1	0	0	0	0	0	0	0	0	0	0	0	0	0	0	1	1	1	0	0
II	3497511	3497512	0	0	0	0	0	1	0	0	0	0	0	0	0	0	0	0	1	0	1	1	0	1	0	1	0	0	1	0	0	0	0	0	0	0	0	0	0	0	0	0	0	0	0	1	1	0	0
III	2431587	2431588	1	1	0	0	0	1	0	0	0	0	0	0	0	0	0	0	0	0	0	0	0	0	0	0	0	0	0	1	0	0	0	0	0	0	0	0	0	0	0	0	1	1	0	0	1	0	0
II	140477	140478	0	1	0	0	0	1	0	0	0	0	0	0	0	0	0	0	0	1	0	0	0	0	0	0	0	0	0	1	0	0	0	0	0	0	0	0	0	0	0	0	0	0	1	1	1	0	0
II	384187	384188	0	0	0	0	0	0	0	0	1	1	0	0	0	0	0	1	0	1	0	1	1	0	0	0	0	1	0	0	1	0	0	0	0	0	0	0	0	0	0	0	0	0	0	0	0	0	0
III	523848	523849	1	0	0	0	0	0	0	0	0	0	0	0	1	0	0	0	1	0	0	0	0	0	1	0	0	0	0	1	0	0	0	0	0	1	0	0	0	0	0	0	1	1	0	0	0	0	1
III	2147690	2147691	1	0	1	0	0	1	1	0	0	0	0	0	1	0	0	0	0	0	0	0	0	0	0	0	0	0	0	1	0	0	0	0	0	0	0	0	0	0	1	1	0	0	0	1	0	0	0
I	1129435	1129449	1	0	0	0	0	1	0	0	0	0	0	0	0	0	1	0	1	0	0	0	0	0	0	0	0	0	0	0	0	0	0	0	0	0	0	0	0	0	1	0	1	1	1	1	1	0	0
II	2117036	2117037	0	0	0	0	0	1	0	1	0	1	0	0	0	0	0	0	0	0	0	0	0	1	0	0	0	0	0	0	0	0	0	0	0	1	0	0	1	0	1	0	0	0	0	1	1	0	0
II	4533223	4533224	1	1	0	0	0	0	0	1	0	1	0	0	0	0	0	0	0	0	0	0	0	1	0	0	0	0	0	1	0	0	0	0	0	1	0	0	1	0	1	0	1	0	1	0	0	0	1
II	4164039	4164040	0	1	1	0	0	0	0	0	0	0	0	1	0	0	0	0	0	1	0	0	1	0	1	0	1	1	0	1	0	0	0	0	0	1	0	1	0	0	1	0	0	1	0	0	0	0	0
III	1581843	1581844	0	1	1	1	0	1	0	0	0	0	0	0	0	0	0	0	0	1	0	0	0	0	0	0	0	1	0	0	0	0	0	0	0	0	0	1	0	0	0	0	0	0	1	0	1	0	0
II	3403459	3403460	0	0	0	0	0	0	0	1	1	1	0	0	1	0	0	1	0	1	1	1	1	1	1	1	1	0	1	0	1	0	0	0	0	0	0	1	0	0	0	0	0	0	1	0	0	0	0
I	3934823	3934825	1	1	0	1	0	1	1	0	0	1	0	1	0	0	1	0	1	0	0	0	0	0	0	0	0	0	0	1	0	0	0	0	0	0	0	1	1	0	1	1	0	1	1	0	1	0	0
I	1563817	1568732	1	0	0	0	0	0	0	0	0	0	1	0	0	1	1	1	1	1	1	0	0	1	0	1	1	1	1	0	0	1	0	0	1	1	0	1	1	1	0	0	0	0	0	0	0	0	1
II	189298	189299	0	1	0	0	0	1	1	1	1	1	0	0	1	0	1	1	1	1	0	0	1	0	1	1	1	1	0	1	1	0	0	0	0	0	0	0	0	0	0	0	1	1	1	1	1	0	0
III	2180475	2180832	0	0	0	0	1	0	1	0	0	0	1	1	1	1	1	0	1	0	1	1	1	1	1	1	1	1	1	0	1	1	1	1	1	0	1	1	1	1	1	0	0	1	1	1	1	1	1
I	1265809	1266166	1	1	1	1	1	1	1	1	1	1	1	1	0	1	1	0	0	1	1	1	0	1	1	1	1	0	1	0	0	1	1	1	1	1	1	0	1	1	1	1	0	1	1	1	1	1	1
II	846705	847051	0	1	1	1	1	1	1	1	0	0	1	0	1	1	1	0	1	1	1	1	1	1	1	1	1	1	1	0	1	1	1	0	1	1	1	1	1	1	1	1	1	1	1	1	1	0	1
III	499951	500308	0	1	1	1	1	1	1	1	1	1	1	1	1	1	1	0	0	1	0	1	1	0	1	1	1	0	1	1	1	1	1	1	1	1	1	1	1	1	1	1	1	1	1	1	1	1	1
I	3190954	3191311	1	1	1	1	1	1	1	1	1	1	1	1	1	1	1	1	1	1	1	1	1	1	1	1	1	1	1	1	1	1	1	0	1	1	1	1	1	1	1	1	1	1	0	1	1	1	1
I	5175815	5176226	1	1	1	1	1	1	1	1	1	1	1	1	1	1	1	1	1	1	1	1	1	1	1	1	0	1	1	1	1	1	1	0	1	1	1	1	1	1	1	1	1	1	1	1	1	1	1
I	5325149	5325497	1	1	1	1	1	1	1	1	1	1	1	1	1	1	1	1	1	1	1	1	1	1	1	1	1	1	1	1	1	1	1	0	1	1	0	1	1	1	1	1	1	1	1	0	1	1	1
II	3489303	3489651	1	1	1	1	1	1	1	1	1	1	1	1	1	1	1	1	1	1	0	1	1	0	1	0	1	1	1	1	1	1	1	1	1	1	1	1	1	1	1	1	1	1	1	1	1	1	1
III	381641	382003	0	1	1	1	1	1	1	1	1	1	1	1	1	1	1	1	1	1	1	1	1	1	1	1	1	1	1	1	0	1	1	0	1	1	1	1	1	1	1	1	1	1	1	1	1	1	1
III	2083919	2084275	1	1	1	1	1	1	1	1	1	1	1	1	1	1	0	1	1	1	1	1	1	1	1	1	1	1	1	1	1	1	1	0	1	1	1	1	1	1	1	1	1	1	1	1	1	1	0
III	2148154	2148502	1	1	1	1	1	1	1	1	1	1	1	1	1	1	1	1	1	1	1	1	1	1	1	1	1	1	1	1	1	1	1	1	1	1	1	1	1	1	1	1	1	1	1	1	1	1	1
I	5021560	5021908	1	1	1	1	1	1	1	0	0	1	1	1	1	1	1	1	1	1	1	1	1	1	1	1	1	1	1	1	1	1	1	1	1	1	1	1	1	1	1	1	1	1	1	1	1	1	1
II	2080929	2081276	1	1	1	1	1	1	1	1	1	0	1	1	1	1	1	1	1	1	1	1	1	1	1	1	1	1	1	1	1	1	1	0	1	1	1	1	1	1	1	1	1	1	1	1	1	1	1
II	3282860	3283208	1	1	1	1	1	1	1	1	1	1	1	1	1	1	1	1	0	1	1	1	1	1	1	1	1	1	1	1	1	1	1	0	1	1	1	1	1	1	1	1	1	1	1	1	1	1	1
III	2158747	2159089	1	1	1	1	1	1	1	1	1	1	1	1	1	1	1	1	1	1	1	1	1	1	1	1	1	1	1	1	1	1	1	0	1	1	1	1	1	1	1	1	1	1	1	1	1	1	1
I	397023	397370	1	1	1	1	1	1	1	1	1	1	1	1	1	1	1	1	1	1	1	1	1	1	1	1	1	1	1	1	1	1	1	0	1	1	1	1	1	1	1	1	1	1	1	1	1	1	1
I	2437580	2437941	1	1	1	1	1	1	1	1	1	0	1	1	1	1	1	1	1	1	1	1	1	1	1	1	1	1	1	1	1	1	1	1	1	1	1	1	1	1	1	1	1	1	1	1	1	1	1
I	2854057	2854405	1	1	1	1	1	1	1	1	1	0	1	1	1	1	1	1	1	1	1	1	1	1	1	1	1	1	1	1	1	1	1	1	1	1	1	1	1	1	1	1	1	1	1	1	1	1	1
I	3321466	3321823	1	1	1	1	1	1	1	1	1	1	1	1	1	1	1	1	1	1	1	1	1	1	1	1	1	1	1	1	1	1	1	1	1	1	1	1	1	1	1	1	1	1	1	1	1	1	0
I	4897509	4897866	1	1	1	1	1	1	1	1	1	1	1	1	1	1	1	1	1	1	1	1	1	1	1	1	1	1	1	1	1	1	1	1	1	1	1	1	1	1	1	1	0	1	1	1	1	1	1
II	2163463	2163810	1	1	1	1	1	1	1	1	1	1	1	1	1	1	1	1	1	1	1	1	1	1	1	1	1	1	1	1	1	1	1	0	1	1	1	1	1	1	1	1	1	1	1	1	1	1	1
II	2380161	2380508	1	1	1	1	1	1	0	1	1	1	1	1	1	1	1	1	1	1	1	1	1	1	1	1	1	1	1	1	1	1	1	1	1	1	1	1	1	1	1	1	1	1	1	1	1	1	1
II	2425971	2426336	1	1	1	1	1	1	1	1	1	1	1	1	1	1	1	1	1	1	1	1	1	1	1	1	1	1	1	1	1	1	1	1	1	1	1	1	1	1	0	1	1	1	1	1	1	1	1
II	2636814	2637157	1	1	1	1	1	1	1	1	1	1	1	1	1	1	1	1	1	1	1	1	1	1	1	1	1	1	1	1	1	1	1	0	1	1	1	1	1	1	1	1	1	1	1	1	1	1	1
II	3105823	3106180	1	1	1	1	1	1	1	1	1	1	1	1	1	1	1	1	1	1	1	1	1	1	1	1	1	1	1	1	1	1	1	0	1	1	1	1	1	1	1	1	1	1	1	1	1	1	1
II	4160955	4161260	1	1	1	1	1	1	1	1	1	1	1	1	1	1	1	1	1	1	1	1	1	1	1	1	1	1	1	1	1	1	1	0	1	1	1	1	1	1	1	1	1	1	1	1	1	1	1
III	187086	187449	1	1	1	1	1	1	1	1	1	1	1	1	1	1	1	1	1	1	1	1	1	1	1	1	1	1	1	1	1	1	1	0	1	1	1	1	1	1	1	1	1	1	1	1	1	1	1
III	1530150	1530498	1	1	1	1	1	1	1	1	1	1	1	1	1	1	1	1	1	1	1	1	1	1	1	1	1	1	1	1	0	1	1	1	1	1	1	1	1	1	1	1	1	1	1	1	1	1	1
III	1862027	1862384	1	1	1	1	1	1	1	1	1	1	1	1	1	1	1	1	1	1	1	1	1	1	1	1	1	1	1	1	1	1	1	0	1	1	1	1	1	1	1	1	1	1	1	1	1	1	1
I	21035	21329	1	1	1	1	1	1	1	1	1	1	1	1	1	1	1	1	1	1	1	1	1	1	1	1	1	1	1	1	1	1	1	1	1	1	1	1	1	1	1	1	1	1	1	1	1	1	1
I	24281	24445	1	1	1	1	1	1	1	1	1	1	1	1	1	1	1	1	1	1	1	1	1	1	1	1	1	1	1	1	1	1	1	1	1	1	1	1	1	1	1	1	1	1	1	1	1	1	1
I	24581	24876	1	1	1	1	1	1	1	1	1	1	1	1	1	1	1	1	1	1	1	1	1	1	1	1	1	1	1	1	1	1	1	1	1	1	1	1	1	1	1	1	1	1	1	1	1	1	1
I	25997	26339	1	1	1	1	1	1	1	1	1	1	1	1	1	1	1	1	1	1	1	1	1	1	1	1	1	1	1	1	1	1	1	1	1	1	1	1	1	1	1	1	1	1	1	1	1	1	1
I	28124	28480	1	1	1	1	1	1	1	1	1	1	1	1	1	1	1	1	1	1	1	1	1	1	1	1	1	1	1	1	1	1	1	1	1	1	1	1	1	1	1	1	1	1	1	1	1	1	1
I	32863	33057	1	1	1	1	1	1	1	1	1	1	1	1	1	1	1	1	1	1	1	1	1	1	1	1	1	1	1	1	1	1	1	1	1	1	1	1	1	1	1	1	1	1	1	1	1	1	1
I	54499	54854	1	1	1	1	1	1	1	1	1	1	1	1	1	1	1	1	1	1	1	1	1	1	1	1	1	1	1	1	1	1	1	1	1	1	1	1	1	1	1	1	1	1	1	1	1	1	1
I	73709	73977	1	1	1	1	1	1	1	1	1	1	1	1	1	1	1	1	1	1	1	1	1	1	1	1	1	1	1	1	1	1	1	1	1	1	1	1	1	1	1	1	1	1	1	1	1	1	1
I	73945	74282	1	1	1	1	1	1	1	1	1	1	1	1	1	1	1	1	1	1	1	1	1	1	1	1	1	1	1	1	1	1	1	1	1	1	1	1	1	1	1	1	1	1	1	1	1	1	1
I	79680	79768	1	1	1	1	1	1	1	1	1	1	1	1	1	1	1	1	1	1	1	1	1	1	1	1	1	1	1	1	1	1	1	1	1	1	1	1	1	1	1	1	1	1	1	1	1	1	1
I	98631	98942	1	1	1	1	1	1	1	1	1	1	1	1	1	1	1	1	1	1	1	1	1	1	1	1	1	1	1	1	1	1	1	1	1	1	1	1	1	1	1	1	1	1	1	1	1	1	1
I	98988	99228	1	1	1	1	1	1	1	1	1	1	1	1	1	1	1	1	1	1	1	1	1	1	1	1	1	1	1	1	1	1	1	1	1	1	1	1	1	1	1	1	1	1	1	1	1	1	1
I	106349	106684	1	1	1	1	1	1	1	1	1	1	1	1	1	1	1	1	1	1	1	1	1	1	1	1	1	1	1	1	1	1	1	1	1	1	1	1	1	1	1	1	1	1	1	1	1	1	1
I	402409	402782	1	1	1	1	1	1	1	1	1	1	1	1	1	1	1	1	1	1	1	1	1	1	1	1	1	1	1	1	1	1	1	1	1	1	1	1	1	1	1	1	1	1	1	1	1	1	1
I	446075	446342	1	1	1	1	1	1	1	1	1	1	1	1	1	1	1	1	1	1	1	1	1	1	1	1	1	1	1	1	1	1	1	1	1	1	1	1	1	1	1	1	1	1	1	1	1	1	1
I	563321	563628	1	1	1	1	1	1	1	1	1	1	1	1	1	1	1	1	1	1	1	1	1	1	1	1	1	1	1	1	1	1	1	1	1	1	1	1	1	1	1	1	1	1	1	1	1	1	1
I	617366	617715	1	1	1	1	1	1	1	1	1	1	1	1	1	1	1	1	1	1	1	1	1	1	1	1	1	1	1	1	1	1	1	1	1	1	1	1	1	1	1	1	1	1	1	1	1	1	1
I	669786	670131	1	1	1	1	1	1	1	1	1	1	1	1	1	1	1	1	1	1	1	1	1	1	1	1	1	1	1	1	1	1	1	1	1	1	1	1	1	1	1	1	1	1	1	1	1	1	1
I	1004892	1005249	1	1	1	1	1	1	1	1	1	1	1	1	1	1	1	1	1	1	1	1	1	1	1	1	1	1	1	1	1	1	1	1	1	1	1	1	1	1	1	1	1	1	1	1	1	1	1
I	1044522	1044860	1	1	1	1	1	1	1	1	1	1	1	1	1	1	1	1	1	1	1	1	1	1	1	1	1	1	1	1	1	1	1	1	1	1	1	1	1	1	1	1	1	1	1	1	1	1	1
I	1118434	1118790	1	1	1	1	1	1	1	1	1	1	1	1	1	1	1	1	1	1	1	1	1	1	1	1	1	1	1	1	1	1	1	1	1	1	1	1	1	1	1	1	1	1	1	1	1	1	1
I	1142619	1142965	1	1	1	1	1	1	1	1	1	1	1	1	1	1	1	1	1	1	1	1	1	1	1	1	1	1	1	1	1	1	1	1	1	1	1	1	1	1	1	1	1	1	1	1	1	1	1
I	1148611	1148794	1	1	1	1	1	1	1	1	1	1	1	1	1	1	1	1	1	1	1	1	1	1	1	1	1	1	1	1	1	1	1	1	1	1	1	1	1	1	1	1	1	1	1	1	1	1	1
I	1398600	1398936	1	1	1	1	1	1	1	1	1	1	1	1	1	1	1	1	1	1	1	1	1	1	1	1	1	1	1	1	1	1	1	1	1	1	1	1	1	1	1	1	1	1	1	1	1	1	1
I	1444293	1444655	1	1	1	1	1	1	1	1	1	1	1	1	1	1	1	1	1	1	1	1	1	1	1	1	1	1	1	1	1	1	1	1	1	1	1	1	1	1	1	1	1	1	1	1	1	1	1
I	1663486	1663829	1	1	1	1	1	1	1	1	1	1	1	1	1	1	1	1	1	1	1	1	1	1	1	1	1	1	1	1	1	1	1	1	1	1	1	1	1	1	1	1	1	1	1	1	1	1	1
I	1999638	1999964	1	1	1	1	1	1	1	1	1	1	1	1	1	1	1	1	1	1	1	1	1	1	1	1	1	1	1	1	1	1	1	1	1	1	1	1	1	1	1	1	1	1	1	1	1	1	1
I	2012006	2012346	1	1	1	1	1	1	1	1	1	1	1	1	1	1	1	1	1	1	1	1	1	1	1	1	1	1	1	1	1	1	1	1	1	1	1	1	1	1	1	1	1	1	1	1	1	1	1
I	2173899	2174235	1	1	1	1	1	1	1	1	1	1	1	1	1	1	1	1	1	1	1	1	1	1	1	1	1	1	1	1	1	1	1	1	1	1	1	1	1	1	1	1	1	1	1	1	1	1	1
I	2186786	2187129	1	1	1	1	1	1	1	1	1	1	1	1	1	1	1	1	1	1	1	1	1	1	1	1	1	1	1	1	1	1	1	1	1	1	1	1	1	1	1	1	1	1	1	1	1	1	1
I	2415505	2415860	1	1	1	1	1	1	1	1	1	1	1	1	1	1	1	1	1	1	1	1	1	1	1	1	1	1	1	1	1	1	1	1	1	1	1	1	1	1	1	1	1	1	1	1	1	1	1
I	2474235	2474583	1	1	1	1	1	1	1	1	1	1	1	1	1	1	1	1	1	1	1	1	1	1	1	1	1	1	1	1	1	1	1	1	1	1	1	1	1	1	1	1	1	1	1	1	1	1	1
I	2605356	2605703	1	1	1	1	1	1	1	1	1	1	1	1	1	1	1	1	1	1	1	1	1	1	1	1	1	1	1	1	1	1	1	1	1	1	1	1	1	1	1	1	1	1	1	1	1	1	1
I	2693886	2694225	1	1	1	1	1	1	1	1	1	1	1	1	1	1	1	1	1	1	1	1	1	1	1	1	1	1	1	1	1	1	1	1	1	1	1	1	1	1	1	1	1	1	1	1	1	1	1
I	2843759	2844091	1	1	1	1	1	1	1	1	1	1	1	1	1	1	1	1	1	1	1	1	1	1	1	1	1	1	1	1	1	1	1	1	1	1	1	1	1	1	1	1	1	1	1	1	1	1	1
I	2939937	2940229	1	1	1	1	1	1	1	1	1	1	1	1	1	1	1	1	1	1	1	1	1	1	1	1	1	1	1	1	1	1	1	1	1	1	1	1	1	1	1	1	1	1	1	1	1	1	1
I	2941944	2942286	1	1	1	1	1	1	1	1	1	1	1	1	1	1	1	1	1	1	1	1	1	1	1	1	1	1	1	1	1	1	1	1	1	1	1	1	1	1	1	1	1	1	1	1	1	1	1
I	3043430	3043787	1	1	1	1	1	1	1	1	1	1	1	1	1	1	1	1	1	1	1	1	1	1	1	1	1	1	1	1	1	1	1	1	1	1	1	1	1	1	1	1	1	1	1	1	1	1	1
I	3072450	3072805	1	1	1	1	1	1	1	1	1	1	1	1	1	1	1	1	1	1	1	1	1	1	1	1	1	1	1	1	1	1	1	1	1	1	1	1	1	1	1	1	1	1	1	1	1	1	1
I	3134575	3134919	1	1	1	1	1	1	1	1	1	1	1	1	1	1	1	1	1	1	1	1	1	1	1	1	1	1	1	1	1	1	1	1	1	1	1	1	1	1	1	1	1	1	1	1	1	1	1
I	3245333	3245683	1	1	1	1	1	1	1	1	1	1	1	1	1	1	1	1	1	1	1	1	1	1	1	1	1	1	1	1	1	1	1	1	1	1	1	1	1	1	1	1	1	1	1	1	1	1	1
I	3438221	3438576	1	1	1	1	1	1	1	1	1	1	1	1	1	1	1	1	1	1	1	1	1	1	1	1	1	1	1	1	1	1	1	1	1	1	1	1	1	1	1	1	1	1	1	1	1	1	1
I	3478114	3478322	1	1	1	1	1	1	1	1	1	1	1	1	1	1	1	1	1	1	1	1	1	1	1	1	1	1	1	1	1	1	1	1	1	1	1	1	1	1	1	1	1	1	1	1	1	1	1
I	3586218	3586423	1	1	1	1	1	1	1	1	1	1	1	1	1	1	1	1	1	1	1	1	1	1	1	1	1	1	1	1	1	1	1	1	1	1	1	1	1	1	1	1	1	1	1	1	1	1	1
I	3924228	3924580	1	1	1	1	1	1	1	1	1	1	1	1	1	1	1	1	1	1	1	1	1	1	1	1	1	1	1	1	1	1	1	1	1	1	1	1	1	1	1	1	1	1	1	1	1	1	1
I	3959530	3959668	1	1	1	1	1	1	1	1	1	1	1	1	1	1	1	1	1	1	1	1	1	1	1	1	1	1	1	1	1	1	1	1	1	1	1	1	1	1	1	1	1	1	1	1	1	1	1
I	3995538	3995887	1	1	1	1	1	1	1	1	1	1	1	1	1	1	1	1	1	1	1	1	1	1	1	1	1	1	1	1	1	1	1	1	1	1	1	1	1	1	1	1	1	1	1	1	1	1	1
I	4140539	4140896	1	1	1	1	1	1	1	1	1	1	1	1	1	1	1	1	1	1	1	1	1	1	1	1	1	1	1	1	1	1	1	1	1	1	1	1	1	1	1	1	1	1	1	1	1	1	1
I	4287575	4287933	1	1	1	1	1	1	1	1	1	1	1	1	1	1	1	1	1	1	1	1	1	1	1	1	1	1	1	1	1	1	1	1	1	1	1	1	1	1	1	1	1	1	1	1	1	1	1
I	4294232	4294523	1	1	1	1	1	1	1	1	1	1	1	1	1	1	1	1	1	1	1	1	1	1	1	1	1	1	1	1	1	1	1	1	1	1	1	1	1	1	1	1	1	1	1	1	1	1	1
I	4524914	4525142	1	1	1	1	1	1	1	1	1	1	1	1	1	1	1	1	1	1	1	1	1	1	1	1	1	1	1	1	1	1	1	1	1	1	1	1	1	1	1	1	1	1	1	1	1	1	1
I	4525245	4525599	1	1	1	1	1	1	1	1	1	1	1	1	1	1	1	1	1	1	1	1	1	1	1	1	1	1	1	1	1	1	1	1	1	1	1	1	1	1	1	1	1	1	1	1	1	1	1
I	4525577	4525926	1	1	1	1	1	1	1	1	1	1	1	1	1	1	1	1	1	1	1	1	1	1	1	1	1	1	1	1	1	1	1	1	1	1	1	1	1	1	1	1	1	1	1	1	1	1	1
I	4619245	4619544	1	1	1	1	1	1	1	1	1	1	1	1	1	1	1	1	1	1	1	1	1	1	1	1	1	1	1	1	1	1	1	1	1	1	1	1	1	1	1	1	1	1	1	1	1	1	1
I	4910978	4911115	1	1	1	1	1	1	1	1	1	1	1	1	1	1	1	1	1	1	1	1	1	1	1	1	1	1	1	1	1	1	1	1	1	1	1	1	1	1	1	1	1	1	1	1	1	1	1
I	4919147	4919506	1	1	1	1	1	1	1	1	1	1	1	1	1	1	1	1	1	1	1	1	1	1	1	1	1	1	1	1	1	1	1	1	1	1	1	1	1	1	1	1	1	1	1	1	1	1	1
I	4939621	4939972	1	1	1	1	1	1	1	1	1	1	1	1	1	1	1	1	1	1	1	1	1	1	1	1	1	1	1	1	1	1	1	1	1	1	1	1	1	1	1	1	1	1	1	1	1	1	1
I	4941720	4942068	1	1	1	1	1	1	1	1	1	1	1	1	1	1	1	1	1	1	1	1	1	1	1	1	1	1	1	1	1	1	1	1	1	1	1	1	1	1	1	1	1	1	1	1	1	1	1
I	5066415	5066762	1	1	1	1	1	1	1	1	1	1	1	1	1	1	1	1	1	1	1	1	1	1	1	1	1	1	1	1	1	1	1	1	1	1	1	1	1	1	1	1	1	1	1	1	1	1	1
I	5200296	5200657	1	1	1	1	1	1	1	1	1	1	1	1	1	1	1	1	1	1	1	1	1	1	1	1	1	1	1	1	1	1	1	1	1	1	1	1	1	1	1	1	1	1	1	1	1	1	1
I	5496305	5496655	1	1	1	1	1	1	1	1	1	1	1	1	1	1	1	1	1	1	1	1	1	1	1	1	1	1	1	1	1	1	1	1	1	1	1	1	1	1	1	1	1	1	1	1	1	1	1
I	5541543	5541852	1	1	1	1	1	1	1	1	1	1	1	1	1	1	1	1	1	1	1	1	1	1	1	1	1	1	1	1	1	1	1	1	1	1	1	1	1	1	1	1	1	1	1	1	1	1	1
I	5558866	5559091	1	1	1	1	1	1	1	1	1	1	1	1	1	1	1	1	1	1	1	1	1	1	1	1	1	1	1	1	1	1	1	1	1	1	1	1	1	1	1	1	1	1	1	1	1	1	1
I	5570061	5570383	1	1	1	1	1	1	1	1	1	1	1	1	1	1	1	1	1	1	1	1	1	1	1	1	1	1	1	1	1	1	1	1	1	1	1	1	1	1	1	1	1	1	1	1	1	1	1
II	997	1215	1	1	1	1	1	1	1	1	1	1	1	1	1	1	1	1	1	1	1	1	1	1	1	1	1	1	1	1	1	1	1	1	1	1	1	1	1	1	1	1	1	1	1	1	1	1	1
II	1296	1591	1	1	1	1	1	1	1	1	1	1	1	1	1	1	1	1	1	1	1	1	1	1	1	1	1	1	1	1	1	1	1	1	1	1	1	1	1	1	1	1	1	1	1	1	1	1	1
II	2756	3054	1	1	1	1	1	1	1	1	1	1	1	1	1	1	1	1	1	1	1	1	1	1	1	1	1	1	1	1	1	1	1	1	1	1	1	1	1	1	1	1	1	1	1	1	1	1	1
II	4835	5191	1	1	1	1	1	1	1	1	1	1	1	1	1	1	1	1	1	1	1	1	1	1	1	1	1	1	1	1	1	1	1	1	1	1	1	1	1	1	1	1	1	1	1	1	1	1	1
II	57151	57483	1	1	1	1	1	1	1	1	1	1	1	1	1	1	1	1	1	1	1	1	1	1	1	1	1	1	1	1	1	1	1	1	1	1	1	1	1	1	1	1	1	1	1	1	1	1	1
II	57604	57821	1	1	1	1	1	1	1	1	1	1	1	1	1	1	1	1	1	1	1	1	1	1	1	1	1	1	1	1	1	1	1	1	1	1	1	1	1	1	1	1	1	1	1	1	1	1	1
II	63206	63538	1	1	1	1	1	1	1	1	1	1	1	1	1	1	1	1	1	1	1	1	1	1	1	1	1	1	1	1	1	1	1	1	1	1	1	1	1	1	1	1	1	1	1	1	1	1	1
II	93517	93860	1	1	1	1	1	1	1	1	1	1	1	1	1	1	1	1	1	1	1	1	1	1	1	1	1	1	1	1	1	1	1	1	1	1	1	1	1	1	1	1	1	1	1	1	1	1	1
II	96276	96619	1	1	1	1	1	1	1	1	1	1	1	1	1	1	1	1	1	1	1	1	1	1	1	1	1	1	1	1	1	1	1	1	1	1	1	1	1	1	1	1	1	1	1	1	1	1	1
II	99035	99378	1	1	1	1	1	1	1	1	1	1	1	1	1	1	1	1	1	1	1	1	1	1	1	1	1	1	1	1	1	1	1	1	1	1	1	1	1	1	1	1	1	1	1	1	1	1	1
II	101794	102137	1	1	1	1	1	1	1	1	1	1	1	1	1	1	1	1	1	1	1	1	1	1	1	1	1	1	1	1	1	1	1	1	1	1	1	1	1	1	1	1	1	1	1	1	1	1	1
II	136385	136555	1	1	1	1	1	1	1	1	1	1	1	1	1	1	1	1	1	1	1	1	1	1	1	1	1	1	1	1	1	1	1	1	1	1	1	1	1	1	1	1	1	1	1	1	1	1	1
II	458478	458824	1	1	1	1	1	1	1	1	1	1	1	1	1	1	1	1	1	1	1	1	1	1	1	1	1	1	1	1	1	1	1	1	1	1	1	1	1	1	1	1	1	1	1	1	1	1	1
II	593824	594176	1	1	1	1	1	1	1	1	1	1	1	1	1	1	1	1	1	1	1	1	1	1	1	1	1	1	1	1	1	1	1	1	1	1	1	1	1	1	1	1	1	1	1	1	1	1	1
II	676281	676634	1	1	1	1	1	1	1	1	1	1	1	1	1	1	1	1	1	1	1	1	1	1	1	1	1	1	1	1	1	1	1	1	1	1	1	1	1	1	1	1	1	1	1	1	1	1	1
II	739738	740096	1	1	1	1	1	1	1	1	1	1	1	1	1	1	1	1	1	1	1	1	1	1	1	1	1	1	1	1	1	1	1	1	1	1	1	1	1	1	1	1	1	1	1	1	1	1	1
II	778133	782134	1	1	1	1	1	1	1	1	1	1	1	1	1	1	1	1	1	1	1	1	1	1	1	1	1	1	1	1	1	1	1	1	1	1	1	1	1	1	1	1	1	1	1	1	1	1	1
II	942476	942820	1	1	1	1	1	1	1	1	1	1	1	1	1	1	1	1	1	1	1	1	1	1	1	1	1	1	1	1	1	1	1	1	1	1	1	1	1	1	1	1	1	1	1	1	1	1	1
II	1034420	1034731	1	1	1	1	1	1	1	1	1	1	1	1	1	1	1	1	1	1	1	1	1	1	1	1	1	1	1	1	1	1	1	1	1	1	1	1	1	1	1	1	1	1	1	1	1	1	1
II	1073869	1074074	1	1	1	1	1	1	1	1	1	1	1	1	1	1	1	1	1	1	1	1	1	1	1	1	1	1	1	1	1	1	1	1	1	1	1	1	1	1	1	1	1	1	1	1	1	1	1
II	1079189	1079526	1	1	1	1	1	1	1	1	1	1	1	1	1	1	1	1	1	1	1	1	1	1	1	1	1	1	1	1	1	1	1	1	1	1	1	1	1	1	1	1	1	1	1	1	1	1	1
II	1120415	1120670	1	1	1	1	1	1	1	1	1	1	1	1	1	1	1	1	1	1	1	1	1	1	1	1	1	1	1	1	1	1	1	1	1	1	1	1	1	1	1	1	1	1	1	1	1	1	1
II	1532619	1532951	1	1	1	1	1	1	1	1	1	1	1	1	1	1	1	1	1	1	1	1	1	1	1	1	1	1	1	1	1	1	1	1	1	1	1	1	1	1	1	1	1	1	1	1	1	1	1
II	1805772	1806127	1	1	1	1	1	1	1	1	1	1	1	1	1	1	1	1	1	1	1	1	1	1	1	1	1	1	1	1	1	1	1	1	1	1	1	1	1	1	1	1	1	1	1	1	1	1	1
II	1826267	1826606	1	1	1	1	1	1	1	1	1	1	1	1	1	1	1	1	1	1	1	1	1	1	1	1	1	1	1	1	1	1	1	1	1	1	1	1	1	1	1	1	1	1	1	1	1	1	1
II	2012305	2012648	1	1	1	1	1	1	1	1	1	1	1	1	1	1	1	1	1	1	1	1	1	1	1	1	1	1	1	1	1	1	1	1	1	1	1	1	1	1	1	1	1	1	1	1	1	1	1
II	2091487	2091720	1	1	1	1	1	1	1	1	1	1	1	1	1	1	1	1	1	1	1	1	1	1	1	1	1	1	1	1	1	1	1	1	1	1	1	1	1	1	1	1	1	1	1	1	1	1	1
II	2320320	2324320	1	1	1	1	1	1	1	1	1	1	1	1	1	1	1	1	1	1	1	1	1	1	1	1	1	1	1	1	1	1	1	1	1	1	1	1	1	1	1	1	1	1	1	1	1	1	1
II	2339945	2340297	1	1	1	1	1	1	1	1	1	1	1	1	1	1	1	1	1	1	1	1	1	1	1	1	1	1	1	1	1	1	1	1	1	1	1	1	1	1	1	1	1	1	1	1	1	1	1
II	2736508	2736743	1	1	1	1	1	1	1	1	1	1	1	1	1	1	1	1	1	1	1	1	1	1	1	1	1	1	1	1	1	1	1	1	1	1	1	1	1	1	1	1	1	1	1	1	1	1	1
II	3136259	3136520	1	1	1	1	1	1	1	1	1	1	1	1	1	1	1	1	1	1	1	1	1	1	1	1	1	1	1	1	1	1	1	1	1	1	1	1	1	1	1	1	1	1	1	1	1	1	1
II	3168963	3169272	1	1	1	1	1	1	1	1	1	1	1	1	1	1	1	1	1	1	1	1	1	1	1	1	1	1	1	1	1	1	1	1	1	1	1	1	1	1	1	1	1	1	1	1	1	1	1
II	3474256	3474555	1	1	1	1	1	1	1	1	1	1	1	1	1	1	1	1	1	1	1	1	1	1	1	1	1	1	1	1	1	1	1	1	1	1	1	1	1	1	1	1	1	1	1	1	1	1	1
II	3489848	3490095	1	1	1	1	1	1	1	1	1	1	1	1	1	1	1	1	1	1	1	1	1	1	1	1	1	1	1	1	1	1	1	1	1	1	1	1	1	1	1	1	1	1	1	1	1	1	1
II	3489943	3490295	1	1	1	1	1	1	1	1	1	1	1	1	1	1	1	1	1	1	1	1	1	1	1	1	1	1	1	1	1	1	1	1	1	1	1	1	1	1	1	1	1	1	1	1	1	1	1
II	3490384	3490610	1	1	1	1	1	1	1	1	1	1	1	1	1	1	1	1	1	1	1	1	1	1	1	1	1	1	1	1	1	1	1	1	1	1	1	1	1	1	1	1	1	1	1	1	1	1	1
II	3659043	3659390	1	1	1	1	1	1	1	1	1	1	1	1	1	1	1	1	1	1	1	1	1	1	1	1	1	1	1	1	1	1	1	1	1	1	1	1	1	1	1	1	1	1	1	1	1	1	1
II	3676727	3677069	1	1	1	1	1	1	1	1	1	1	1	1	1	1	1	1	1	1	1	1	1	1	1	1	1	1	1	1	1	1	1	1	1	1	1	1	1	1	1	1	1	1	1	1	1	1	1
II	3714033	3714382	1	1	1	1	1	1	1	1	1	1	1	1	1	1	1	1	1	1	1	1	1	1	1	1	1	1	1	1	1	1	1	1	1	1	1	1	1	1	1	1	1	1	1	1	1	1	1
II	3934659	3934738	1	1	1	1	1	1	1	1	1	1	1	1	1	1	1	1	1	1	1	1	1	1	1	1	1	1	1	1	1	1	1	1	1	1	1	1	1	1	1	1	1	1	1	1	1	1	1
II	4047404	4047754	1	1	1	1	1	1	1	1	1	1	1	1	1	1	1	1	1	1	1	1	1	1	1	1	1	1	1	1	1	1	1	1	1	1	1	1	1	1	1	1	1	1	1	1	1	1	1
II	4217977	4218323	1	1	1	1	1	1	1	1	1	1	1	1	1	1	1	1	1	1	1	1	1	1	1	1	1	1	1	1	1	1	1	1	1	1	1	1	1	1	1	1	1	1	1	1	1	1	1
II	4231522	4231869	1	1	1	1	1	1	1	1	1	1	1	1	1	1	1	1	1	1	1	1	1	1	1	1	1	1	1	1	1	1	1	1	1	1	1	1	1	1	1	1	1	1	1	1	1	1	1
II	4296668	4297025	1	1	1	1	1	1	1	1	1	1	1	1	1	1	1	1	1	1	1	1	1	1	1	1	1	1	1	1	1	1	1	1	1	1	1	1	1	1	1	1	1	1	1	1	1	1	1
II	4409793	4410139	1	1	1	1	1	1	1	1	1	1	1	1	1	1	1	1	1	1	1	1	1	1	1	1	1	1	1	1	1	1	1	1	1	1	1	1	1	1	1	1	1	1	1	1	1	1	1
II	4414197	4419057	1	1	1	1	1	1	1	1	1	1	1	1	1	1	1	1	1	1	1	1	1	1	1	1	1	1	1	1	1	1	1	1	1	1	1	1	1	1	1	1	1	1	1	1	1	1	1
II	4436890	4437243	1	1	1	1	1	1	1	1	1	1	1	1	1	1	1	1	1	1	1	1	1	1	1	1	1	1	1	1	1	1	1	1	1	1	1	1	1	1	1	1	1	1	1	1	1	1	1
II	4437498	4437846	1	1	1	1	1	1	1	1	1	1	1	1	1	1	1	1	1	1	1	1	1	1	1	1	1	1	1	1	1	1	1	1	1	1	1	1	1	1	1	1	1	1	1	1	1	1	1
II	4437850	4438205	1	1	1	1	1	1	1	1	1	1	1	1	1	1	1	1	1	1	1	1	1	1	1	1	1	1	1	1	1	1	1	1	1	1	1	1	1	1	1	1	1	1	1	1	1	1	1
II	4474977	4475138	1	1	1	1	1	1	1	1	1	1	1	1	1	1	1	1	1	1	1	1	1	1	1	1	1	1	1	1	1	1	1	1	1	1	1	1	1	1	1	1	1	1	1	1	1	1	1
II	4481108	4481445	1	1	1	1	1	1	1	1	1	1	1	1	1	1	1	1	1	1	1	1	1	1	1	1	1	1	1	1	1	1	1	1	1	1	1	1	1	1	1	1	1	1	1	1	1	1	1
II	4481502	4481842	1	1	1	1	1	1	1	1	1	1	1	1	1	1	1	1	1	1	1	1	1	1	1	1	1	1	1	1	1	1	1	1	1	1	1	1	1	1	1	1	1	1	1	1	1	1	1
II	4481838	4482117	1	1	1	1	1	1	1	1	1	1	1	1	1	1	1	1	1	1	1	1	1	1	1	1	1	1	1	1	1	1	1	1	1	1	1	1	1	1	1	1	1	1	1	1	1	1	1
II	4501568	4501763	1	1	1	1	1	1	1	1	1	1	1	1	1	1	1	1	1	1	1	1	1	1	1	1	1	1	1	1	1	1	1	1	1	1	1	1	1	1	1	1	1	1	1	1	1	1	1
II	4507733	4508064	1	1	1	1	1	1	1	1	1	1	1	1	1	1	1	1	1	1	1	1	1	1	1	1	1	1	1	1	1	1	1	1	1	1	1	1	1	1	1	1	1	1	1	1	1	1	1
II	4514859	4515181	1	1	1	1	1	1	1	1	1	1	1	1	1	1	1	1	1	1	1	1	1	1	1	1	1	1	1	1	1	1	1	1	1	1	1	1	1	1	1	1	1	1	1	1	1	1	1
III	26343	26675	1	1	1	1	1	1	1	1	1	1	1	1	1	1	1	1	1	1	1	1	1	1	1	1	1	1	1	1	1	1	1	1	1	1	1	1	1	1	1	1	1	1	1	1	1	1	1
III	31728	31925	1	1	1	1	1	1	1	1	1	1	1	1	1	1	1	1	1	1	1	1	1	1	1	1	1	1	1	1	1	1	1	1	1	1	1	1	1	1	1	1	1	1	1	1	1	1	1
III	43111	43459	1	1	1	1	1	1	1	1	1	1	1	1	1	1	1	1	1	1	1	1	1	1	1	1	1	1	1	1	1	1	1	1	1	1	1	1	1	1	1	1	1	1	1	1	1	1	1
III	49206	49550	1	1	1	1	1	1	1	1	1	1	1	1	1	1	1	1	1	1	1	1	1	1	1	1	1	1	1	1	1	1	1	1	1	1	1	1	1	1	1	1	1	1	1	1	1	1	1
III	108555	108863	1	1	1	1	1	1	1	1	1	1	1	1	1	1	1	1	1	1	1	1	1	1	1	1	1	1	1	1	1	1	1	1	1	1	1	1	1	1	1	1	1	1	1	1	1	1	1
III	111397	111560	1	1	1	1	1	1	1	1	1	1	1	1	1	1	1	1	1	1	1	1	1	1	1	1	1	1	1	1	1	1	1	1	1	1	1	1	1	1	1	1	1	1	1	1	1	1	1
III	114382	114730	1	1	1	1	1	1	1	1	1	1	1	1	1	1	1	1	1	1	1	1	1	1	1	1	1	1	1	1	1	1	1	1	1	1	1	1	1	1	1	1	1	1	1	1	1	1	1
III	218342	218642	1	1	1	1	1	1	1	1	1	1	1	1	1	1	1	1	1	1	1	1	1	1	1	1	1	1	1	1	1	1	1	1	1	1	1	1	1	1	1	1	1	1	1	1	1	1	1
III	222987	223246	1	1	1	1	1	1	1	1	1	1	1	1	1	1	1	1	1	1	1	1	1	1	1	1	1	1	1	1	1	1	1	1	1	1	1	1	1	1	1	1	1	1	1	1	1	1	1
III	254350	254629	1	1	1	1	1	1	1	1	1	1	1	1	1	1	1	1	1	1	1	1	1	1	1	1	1	1	1	1	1	1	1	1	1	1	1	1	1	1	1	1	1	1	1	1	1	1	1
III	257183	257531	1	1	1	1	1	1	1	1	1	1	1	1	1	1	1	1	1	1	1	1	1	1	1	1	1	1	1	1	1	1	1	1	1	1	1	1	1	1	1	1	1	1	1	1	1	1	1
III	286728	287053	1	1	1	1	1	1	1	1	1	1	1	1	1	1	1	1	1	1	1	1	1	1	1	1	1	1	1	1	1	1	1	1	1	1	1	1	1	1	1	1	1	1	1	1	1	1	1
III	298547	298890	1	1	1	1	1	1	1	1	1	1	1	1	1	1	1	1	1	1	1	1	1	1	1	1	1	1	1	1	1	1	1	1	1	1	1	1	1	1	1	1	1	1	1	1	1	1	1
III	298890	299217	1	1	1	1	1	1	1	1	1	1	1	1	1	1	1	1	1	1	1	1	1	1	1	1	1	1	1	1	1	1	1	1	1	1	1	1	1	1	1	1	1	1	1	1	1	1	1
III	486575	486925	1	1	1	1	1	1	1	1	1	1	1	1	1	1	1	1	1	1	1	1	1	1	1	1	1	1	1	1	1	1	1	1	1	1	1	1	1	1	1	1	1	1	1	1	1	1	1
III	489072	489396	1	1	1	1	1	1	1	1	1	1	1	1	1	1	1	1	1	1	1	1	1	1	1	1	1	1	1	1	1	1	1	1	1	1	1	1	1	1	1	1	1	1	1	1	1	1	1
III	489375	489697	1	1	1	1	1	1	1	1	1	1	1	1	1	1	1	1	1	1	1	1	1	1	1	1	1	1	1	1	1	1	1	1	1	1	1	1	1	1	1	1	1	1	1	1	1	1	1
III	500370	500717	1	1	1	1	1	1	1	1	1	1	1	1	1	1	1	1	1	1	1	1	1	1	1	1	1	1	1	1	1	1	1	1	1	1	1	1	1	1	1	1	1	1	1	1	1	1	1
III	552825	552963	1	1	1	1	1	1	1	1	1	1	1	1	1	1	1	1	1	1	1	1	1	1	1	1	1	1	1	1	1	1	1	1	1	1	1	1	1	1	1	1	1	1	1	1	1	1	1
III	614910	615258	1	1	1	1	1	1	1	1	1	1	1	1	1	1	1	1	1	1	1	1	1	1	1	1	1	1	1	1	1	1	1	1	1	1	1	1	1	1	1	1	1	1	1	1	1	1	1
III	701782	702130	1	1	1	1	1	1	1	1	1	1	1	1	1	1	1	1	1	1	1	1	1	1	1	1	1	1	1	1	1	1	1	1	1	1	1	1	1	1	1	1	1	1	1	1	1	1	1
III	702136	702501	1	1	1	1	1	1	1	1	1	1	1	1	1	1	1	1	1	1	1	1	1	1	1	1	1	1	1	1	1	1	1	1	1	1	1	1	1	1	1	1	1	1	1	1	1	1	1
III	777734	778082	1	1	1	1	1	1	1	1	1	1	1	1	1	1	1	1	1	1	1	1	1	1	1	1	1	1	1	1	1	1	1	1	1	1	1	1	1	1	1	1	1	1	1	1	1	1	1
III	782301	782649	1	1	1	1	1	1	1	1	1	1	1	1	1	1	1	1	1	1	1	1	1	1	1	1	1	1	1	1	1	1	1	1	1	1	1	1	1	1	1	1	1	1	1	1	1	1	1
III	954537	954860	1	1	1	1	1	1	1	1	1	1	1	1	1	1	1	1	1	1	1	1	1	1	1	1	1	1	1	1	1	1	1	1	1	1	1	1	1	1	1	1	1	1	1	1	1	1	1
III	958713	958931	1	1	1	1	1	1	1	1	1	1	1	1	1	1	1	1	1	1	1	1	1	1	1	1	1	1	1	1	1	1	1	1	1	1	1	1	1	1	1	1	1	1	1	1	1	1	1
III	1176250	1176592	1	1	1	1	1	1	1	1	1	1	1	1	1	1	1	1	1	1	1	1	1	1	1	1	1	1	1	1	1	1	1	1	1	1	1	1	1	1	1	1	1	1	1	1	1	1	1
III	1195985	1196059	1	1	1	1	1	1	1	1	1	1	1	1	1	1	1	1	1	1	1	1	1	1	1	1	1	1	1	1	1	1	1	1	1	1	1	1	1	1	1	1	1	1	1	1	1	1	1
III	1196131	1196481	1	1	1	1	1	1	1	1	1	1	1	1	1	1	1	1	1	1	1	1	1	1	1	1	1	1	1	1	1	1	1	1	1	1	1	1	1	1	1	1	1	1	1	1	1	1	1
III	1207147	1207503	1	1	1	1	1	1	1	1	1	1	1	1	1	1	1	1	1	1	1	1	1	1	1	1	1	1	1	1	1	1	1	1	1	1	1	1	1	1	1	1	1	1	1	1	1	1	1
III	1296337	1296666	1	1	1	1	1	1	1	1	1	1	1	1	1	1	1	1	1	1	1	1	1	1	1	1	1	1	1	1	1	1	1	1	1	1	1	1	1	1	1	1	1	1	1	1	1	1	1
III	1400870	1401218	1	1	1	1	1	1	1	1	1	1	1	1	1	1	1	1	1	1	1	1	1	1	1	1	1	1	1	1	1	1	1	1	1	1	1	1	1	1	1	1	1	1	1	1	1	1	1
III	1466109	1466416	1	1	1	1	1	1	1	1	1	1	1	1	1	1	1	1	1	1	1	1	1	1	1	1	1	1	1	1	1	1	1	1	1	1	1	1	1	1	1	1	1	1	1	1	1	1	1
III	1466447	1466627	1	1	1	1	1	1	1	1	1	1	1	1	1	1	1	1	1	1	1	1	1	1	1	1	1	1	1	1	1	1	1	1	1	1	1	1	1	1	1	1	1	1	1	1	1	1	1
III	1475485	1475490	1	1	1	1	1	1	1	1	1	1	1	1	1	1	1	1	1	1	1	1	1	1	1	1	1	1	1	1	1	1	1	1	1	1	1	1	1	1	1	1	1	1	1	1	1	1	1
III	1574724	1575071	1	1	1	1	1	1	1	1	1	1	1	1	1	1	1	1	1	1	1	1	1	1	1	1	1	1	1	1	1	1	1	1	1	1	1	1	1	1	1	1	1	1	1	1	1	1	1
III	1579176	1579526	1	1	1	1	1	1	1	1	1	1	1	1	1	1	1	1	1	1	1	1	1	1	1	1	1	1	1	1	1	1	1	1	1	1	1	1	1	1	1	1	1	1	1	1	1	1	1
III	1581982	1582318	1	1	1	1	1	1	1	1	1	1	1	1	1	1	1	1	1	1	1	1	1	1	1	1	1	1	1	1	1	1	1	1	1	1	1	1	1	1	1	1	1	1	1	1	1	1	1
III	1629525	1629874	1	1	1	1	1	1	1	1	1	1	1	1	1	1	1	1	1	1	1	1	1	1	1	1	1	1	1	1	1	1	1	1	1	1	1	1	1	1	1	1	1	1	1	1	1	1	1
III	1632188	1632545	1	1	1	1	1	1	1	1	1	1	1	1	1	1	1	1	1	1	1	1	1	1	1	1	1	1	1	1	1	1	1	1	1	1	1	1	1	1	1	1	1	1	1	1	1	1	1
III	1684578	1684917	1	1	1	1	1	1	1	1	1	1	1	1	1	1	1	1	1	1	1	1	1	1	1	1	1	1	1	1	1	1	1	1	1	1	1	1	1	1	1	1	1	1	1	1	1	1	1
III	1716281	1716629	1	1	1	1	1	1	1	1	1	1	1	1	1	1	1	1	1	1	1	1	1	1	1	1	1	1	1	1	1	1	1	1	1	1	1	1	1	1	1	1	1	1	1	1	1	1	1
III	1738418	1738761	1	1	1	1	1	1	1	1	1	1	1	1	1	1	1	1	1	1	1	1	1	1	1	1	1	1	1	1	1	1	1	1	1	1	1	1	1	1	1	1	1	1	1	1	1	1	1
III	1740961	1741307	1	1	1	1	1	1	1	1	1	1	1	1	1	1	1	1	1	1	1	1	1	1	1	1	1	1	1	1	1	1	1	1	1	1	1	1	1	1	1	1	1	1	1	1	1	1	1
III	1808837	1809175	1	1	1	1	1	1	1	1	1	1	1	1	1	1	1	1	1	1	1	1	1	1	1	1	1	1	1	1	1	1	1	1	1	1	1	1	1	1	1	1	1	1	1	1	1	1	1
III	1894223	1894553	1	1	1	1	1	1	1	1	1	1	1	1	1	1	1	1	1	1	1	1	1	1	1	1	1	1	1	1	1	1	1	1	1	1	1	1	1	1	1	1	1	1	1	1	1	1	1
III	1933057	1933398	1	1	1	1	1	1	1	1	1	1	1	1	1	1	1	1	1	1	1	1	1	1	1	1	1	1	1	1	1	1	1	1	1	1	1	1	1	1	1	1	1	1	1	1	1	1	1
III	2017004	2017345	1	1	1	1	1	1	1	1	1	1	1	1	1	1	1	1	1	1	1	1	1	1	1	1	1	1	1	1	1	1	1	1	1	1	1	1	1	1	1	1	1	1	1	1	1	1	1
III	2021939	2022290	1	1	1	1	1	1	1	1	1	1	1	1	1	1	1	1	1	1	1	1	1	1	1	1	1	1	1	1	1	1	1	1	1	1	1	1	1	1	1	1	1	1	1	1	1	1	1
III	2040788	2041141	1	1	1	1	1	1	1	1	1	1	1	1	1	1	1	1	1	1	1	1	1	1	1	1	1	1	1	1	1	1	1	1	1	1	1	1	1	1	1	1	1	1	1	1	1	1	1
III	2063791	2064140	1	1	1	1	1	1	1	1	1	1	1	1	1	1	1	1	1	1	1	1	1	1	1	1	1	1	1	1	1	1	1	1	1	1	1	1	1	1	1	1	1	1	1	1	1	1	1
III	2108288	2108631	1	1	1	1	1	1	1	1	1	1	1	1	1	1	1	1	1	1	1	1	1	1	1	1	1	1	1	1	1	1	1	1	1	1	1	1	1	1	1	1	1	1	1	1	1	1	1
III	2110854	2111180	1	1	1	1	1	1	1	1	1	1	1	1	1	1	1	1	1	1	1	1	1	1	1	1	1	1	1	1	1	1	1	1	1	1	1	1	1	1	1	1	1	1	1	1	1	1	1
III	2119789	2120137	1	1	1	1	1	1	1	1	1	1	1	1	1	1	1	1	1	1	1	1	1	1	1	1	1	1	1	1	1	1	1	1	1	1	1	1	1	1	1	1	1	1	1	1	1	1	1
III	2145096	2145433	1	1	1	1	1	1	1	1	1	1	1	1	1	1	1	1	1	1	1	1	1	1	1	1	1	1	1	1	1	1	1	1	1	1	1	1	1	1	1	1	1	1	1	1	1	1	1
III	2147834	2148179	1	1	1	1	1	1	1	1	1	1	1	1	1	1	1	1	1	1	1	1	1	1	1	1	1	1	1	1	1	1	1	1	1	1	1	1	1	1	1	1	1	1	1	1	1	1	1
III	2210258	2210588	1	1	1	1	1	1	1	1	1	1	1	1	1	1	1	1	1	1	1	1	1	1	1	1	1	1	1	1	1	1	1	1	1	1	1	1	1	1	1	1	1	1	1	1	1	1	1
III	2210640	2210988	1	1	1	1	1	1	1	1	1	1	1	1	1	1	1	1	1	1	1	1	1	1	1	1	1	1	1	1	1	1	1	1	1	1	1	1	1	1	1	1	1	1	1	1	1	1	1
III	2220430	2220754	1	1	1	1	1	1	1	1	1	1	1	1	1	1	1	1	1	1	1	1	1	1	1	1	1	1	1	1	1	1	1	1	1	1	1	1	1	1	1	1	1	1	1	1	1	1	1
III	2222680	2223022	1	1	1	1	1	1	1	1	1	1	1	1	1	1	1	1	1	1	1	1	1	1	1	1	1	1	1	1	1	1	1	1	1	1	1	1	1	1	1	1	1	1	1	1	1	1	1
III	2230367	2230688	1	1	1	1	1	1	1	1	1	1	1	1	1	1	1	1	1	1	1	1	1	1	1	1	1	1	1	1	1	1	1	1	1	1	1	1	1	1	1	1	1	1	1	1	1	1	1
III	2319921	2320269	1	1	1	1	1	1	1	1	1	1	1	1	1	1	1	1	1	1	1	1	1	1	1	1	1	1	1	1	1	1	1	1	1	1	1	1	1	1	1	1	1	1	1	1	1	1	1
III	2324487	2324835	1	1	1	1	1	1	1	1	1	1	1	1	1	1	1	1	1	1	1	1	1	1	1	1	1	1	1	1	1	1	1	1	1	1	1	1	1	1	1	1	1	1	1	1	1	1	1
III	2380886	2381185	1	1	1	1	1	1	1	1	1	1	1	1	1	1	1	1	1	1	1	1	1	1	1	1	1	1	1	1	1	1	1	1	1	1	1	1	1	1	1	1	1	1	1	1	1	1	1
III	2400868	2401095	1	1	1	1	1	1	1	1	1	1	1	1	1	1	1	1	1	1	1	1	1	1	1	1	1	1	1	1	1	1	1	1	1	1	1	1	1	1	1	1	1	1	1	1	1	1	1
III	2405874	2406228	1	1	1	1	1	1	1	1	1	1	1	1	1	1	1	1	1	1	1	1	1	1	1	1	1	1	1	1	1	1	1	1	1	1	1	1	1	1	1	1	1	1	1	1	1	1	1
III	2418126	2418384	1	1	1	1	1	1	1	1	1	1	1	1	1	1	1	1	1	1	1	1	1	1	1	1	1	1	1	1	1	1	1	1	1	1	1	1	1	1	1	1	1	1	1	1	1	1	1
III	2422329	2422687	1	1	1	1	1	1	1	1	1	1	1	1	1	1	1	1	1	1	1	1	1	1	1	1	1	1	1	1	1	1	1	1	1	1	1	1	1	1	1	1	1	1	1	1	1	1	1
III	2432243	2432411	1	1	1	1	1	1	1	1	1	1	1	1	1	1	1	1	1	1	1	1	1	1	1	1	1	1	1	1	1	1	1	1	1	1	1	1	1	1	1	1	1	1	1	1	1	1	1
III	2437467	2437780	1	1	1	1	1	1	1	1	1	1	1	1	1	1	1	1	1	1	1	1	1	1	1	1	1	1	1	1	1	1	1	1	1	1	1	1	1	1	1	1	1	1	1	1	1	1	1
[truncated: 10 more columns]

## Sheet: S5_Bowen_etal
#Supplementary Table S5. List of transposable elements found in Bowen et al.
Table updated and edited fromBowen et al. Genome Research 14 (9), 1984-1997 (2003).
sample	seq_ID	clade_affiliation	full_element	len	chr	start	end	LTR_orientation
LTR_loc	PARC_110			344	I	1184	1527	+
LTR_loc	PARW_111			226	I	4858	5083	-
LTR_loc	PARC_112			263	I	8335	8597	+
LTR_loc	PARC_113			46	I	16385	16430	+
LTR_loc	PALC_008			39	I	32938	32976	-
LTR_loc	PALW_009			356	I	54499	54854	+
LTR_loc	PALC_010			297	I	73658	73954	-
LTR_loc	PALW_011			159	I	74124	74282	+
LTR_loc	PALC_012			214	I	79655	79868	-
LTR_loc	PALW_013			358	I	98586	98943	+
LTR_loc	PALC_014			171	I	98933	99103	-
LTR_loc	PALW_015			313	I	106372	106684	+
LTR_loc	PALC_016			76	I	113380	113455	-
LTR_loc	PALC_017			80	I	272740	272819	-
LTR_loc	PALW_018			56	I	275163	275218	+
LTR_loc	PALC_019	beta		348	I	397023	397370	-
LTR_loc	PALW_020	gamma		374	I	402409	402782	+
LTR_loc	PALC_021			290	I	563339	563628	-
LTR_loc	PALW_022	alpha		350	I	617366	617715	+
LTR_loc	PALC_023			346	I	669786	670131	-
LTR_loc	PALC_024			302	I	678420	678721	-
LTR_loc	PALC_025			181	I	828199	828379	-
LTR_loc	PALW_026	alpha		358	I	1004892	1005249	+
LTR_loc	PALW_027			220	I	1044641	1044860	+
LTR_loc	PALW_028	alpha		357	I	1118434	1118790	+
LTR_loc	PALW_029	alpha		309	I	1142657	1142965	+
LTR_loc	PALC_030	iota		206	I	1148642	1148847	-
LTR_loc	PALW_031			313	I	1191723	1192035	+
LTR_loc	PALC_032	alpha		358	I	1265809	1266166	-
LTR_loc	PALW_033	theta		310	I	1398628	1398937	+
LTR_loc	PALW_034	eta		363	I	1444293	1444655	+
LTR_loc	PALW_035	beta	Tf2-1 5'LTR	349	I	1465332	1465680	+
LTR_loc	PALC_036	beta	Tf2-1 3'LTR	349	I	1469899	1470247	+
LTR_loc	PALW_037	beta	Tf2-2 3'LTR	349	I	1563817	1564165	-
LTR_loc	PALC_038	beta	Tf2-2 5'LTR	349	I	1568384	1568732	-
LTR_loc	PALW_039	epsilon		336	I	1663494	1663829	+
LTR_loc	PALW_040			284	I	1999665	1999948	+
LTR_loc	PALW_041	beta		334	I	2012013	2012346	+
LTR_loc	PALW_042			69	I	2169389	2169457	+
LTR_loc	PALC_043			340	I	2173899	2174238	-
LTR_loc	PALW_044			344	I	2186786	2187129	+
LTR_loc	PALW_045			35	I	2262817	2262851	+
LTR_loc	PALW_046			351	I	2415510	2415860	+
LTR_loc	PALW_047	alpha		358	I	2437580	2437937	+
LTR_loc	PALC_048	beta		349	I	2474235	2474583	-
LTR_loc	PALW_049	beta		348	I	2605356	2605703	+
LTR_loc	PALC_050	epsilon		345	I	2693886	2694230	-
LTR_loc	PALC_051			333	I	2843759	2844091	-
LTR_loc	PALW_052	beta		349	I	2854057	2854405	+
LTR_loc	PALC_053	beta	Tf2-3 3'LTR	349	I	2926805	2927153	-
LTR_loc	PALC_054	beta	Tf2-3 5'LTR	349	I	2931372	2931720	-
LTR_loc	PALC_055		Tf-fragment1	173	I	2940057	2940229	-
LTR_loc	PALC_056	beta	Tf-fragment1	349	I	2941944	2942292	-
LTR_loc	PALC_057	alpha		358	I	3043430	3043787	-
LTR_loc	PALW_058			347	I	3072459	3072805	+
LTR_loc	PALW_059			345	I	3134575	3134919	+
LTR_loc	PALW_060	alpha		358	I	3190954	3191311	+
LTR_loc	PALW_061			47	I	3233820	3233866	+
LTR_loc	PALW_062			344	I	3245333	3245676	+
LTR_loc	PALW_063	alpha		358	I	3321466	3321823	+
LTR_loc	PALC_064	beta	Tf2-4 3'LTR	349	I	3361148	3361496	-
LTR_loc	PALC_065	beta	Tf2-4 5'LTR	349	I	3365714	3366062	-
LTR_loc	PALW_066			39	I	3416193	3416231	+
LTR_loc	PALC_067			73	I	3425394	3425466	-
LTR_loc	PALW_068			216	I	3438221	3438436	+
LTR_loc	PALC_069			209	I	3478114	3478322	-
LTR_loc	PALW_070			64	I	3586348	3586411	+
LTR_loc	PARW_071			352	I	3924228	3924579	+
LTR_loc	PARW_072	zeta		285	I	3995603	3995887	+
LTR_loc	PARC_073	beta	Tf2-5 3'LTR	349	I	3996024	3996372	-
LTR_loc	PARC_074	beta	Tf2-5 5'LTR	349	I	4000591	4000939	-
LTR_loc	PARW_075	beta	Tf2-6 5'LTR	349	I	4021977	4022325	+
LTR_loc	PARW_076	beta	Tf2-6 3'LTR	349	I	4026544	4026892	+
LTR_loc	PARC_077	alpha		358	I	4140539	4140896	-
LTR_loc	PARW_078	gamma		379	I	4287555	4287933	+
LTR_loc	PARW_079	iota		292	I	4294232	4294523	+
LTR_loc	PARW_080			52	I	4450627	4450678	+
LTR_loc	PARC_081			160	I	4528426	4528585	-
LTR_loc	PARW_082			162	I	4528793	4528954	+
LTR_loc	PARC_083			160	I	4531462	4531621	-
LTR_loc	PARW_084			162	I	4531830	4531991	+
LTR_loc	PARW_085	zeta		306	I	4619239	4619544	+
LTR_loc	PARC_086			98	I	4709453	4709550	-
LTR_loc	PARC_087	alpha		358	I	4715792	4716149	-
LTR_loc	PARW_088			310	I	4716167	4716476	+
LTR_loc	PARC_089	alpha		358	I	4897509	4897866	-
LTR_loc	PARW_090			138	I	4910978	4911115	+
LTR_loc	PARW_091			360	I	4919147	4919506	+
LTR_loc	PARW_092	zeta		352	I	4939621	4939972	+
LTR_loc	PARW_093	beta		349	I	4941720	4942068	+
LTR_loc	PARW_094	beta		349	I	5021560	5021908	+
LTR_loc	PARC_095			348	I	5066415	5066762	-
LTR_loc	PARC_096			330	I	5066761	5067090	-
LTR_loc	PARW_097	beta		349	I	5175878	5176226	+
LTR_loc	PARC_098	beta	Tf2-8	349	I	5195312	5195660	-
LTR_loc	PARC_100	beta	Tf2-7	349	I	5199879	5200227	-
LTR_loc	PARC_101	iota		336	I	5200322	5200657	-
LTR_loc	PARC_102			124	I	5256255	5256378	-
LTR_loc	PARC_103	beta		349	I	5325149	5325497	-
LTR_loc	PARW_104			61	I	5452048	5452108	+
LTR_loc	PARC_105			351	I	5496305	5496655	-
LTR_loc	PARC_106	gamma		309	I	5541543	5541851	-
LTR_loc	PARC_107			85	I	5558925	5559009	-
LTR_loc	PARW_108			39	I	5563905	5563943	+
LTR_loc	PARC_109			263	I	5570061	5570323	-
LTR_loc	PALW_001			227	II	1295	1521	-
LTR_loc	PALC_002			357	II	4835	5191	+
LTR_loc	PALW_004	theta		274	II	41378	41651	+
LTR_loc	PALC_005			68	II	57151	57218	-
LTR_loc	PALW_006			342	II	57260	57601	+
LTR_loc	PALC_007			193	II	57613	57805	-
LTR_loc	PBLC_001			344	II	93517	93860	-
LTR_loc	PBLC_002			344	II	96276	96619	-
LTR_loc	PBLC_003			344	II	99035	99378	-
LTR_loc	PBLC_004			344	II	101794	102137	-
LTR_loc	PBLW_005			347	II	458478	458824	+
LTR_loc	PBLW_006			131	II	593937	594067	+
LTR_loc	PBLC_007	alpha		356	II	676279	676634	-
LTR_loc	PBLW_008	alpha		359	II	739738	740096	+
LTR_loc	PBLC_009			350	II	846702	847051	-
LTR_loc	PBLW_010			345	II	942476	942820	+
LTR_loc	PBLC_011			135	II	1034420	1034554	-
LTR_loc	PBLW_012			335	II	1079192	1079526	+
LTR_loc	PBLW_013			338	II	1120415	1120752	+
LTR_loc	PBLC_014			51	II	1358023	1358073	-
LTR_loc	PBLW_015			177	II	1410152	1410328	+
LTR_loc	PBLC_016			105	II	1531615	1531719	-
LTR_loc	PBLC_017	eta		298	II	1532619	1532916	-
LTR_loc	PBRW_018			39	II	1659126	1659164	+
LTR_loc	PBRC_019			31	II	1801466	1801496	-
LTR_loc	PBRW_020			149	II	1803645	1803793	+
LTR_loc	PBRC_021	gamma		377	II	1805772	1806148	-
LTR_loc	PBRC_022	beta	Tf2-9 3'LTR	349	II	1812349	1812697	-
LTR_loc	PBRC_023	beta	Tf2-9 5'LTR	349	II	1816914	1817262	-
LTR_loc	PBRW_024	gamma		377	II	1826230	1826606	+
LTR_loc	PBRW_025	beta	Tf2-10 5'LTR	349	II	1964875	1965223	+
LTR_loc	PBRW_026	beta	Tf2-10 3'LTR	349	II	1969441	1969789	+
LTR_loc	PBRC_027	alpha		201	II	2012305	2012505	-
LTR_loc	PBRW_028			236	II	2012413	2012648	+
LTR_loc	PBRC_029			348	II	2080929	2081276	-
LTR_loc	PBRW_030	zeta		307	II	2091414	2091720	+
LTR_loc	PBRW_031			348	II	2163463	2163810	+
LTR_loc	PBRC_032	alpha		353	II	2339945	2340297	-
LTR_loc	PBRC_033	beta		348	II	2380161	2380508	-
LTR_loc	PBRW_034			84	II	2425849	2425932	+
LTR_loc	PBRC_035	beta		349	II	2425988	2426336	-
LTR_loc	PBRW_036	beta		334	II	2636824	2637157	+
LTR_loc	PBRW_037			115	II	2665047	2665161	+
LTR_loc	PBRW_039			324	II	2736508	2736831	+
LTR_loc	PBRC_038	epsilon		68	II	2736632	2736699	-
LTR_loc	PBRC_040	alpha		358	II	3105823	3106180	-
LTR_loc	PBRW_041			150	II	3136327	3136476	+
LTR_loc	PBRW_042			291	II	3168982	3169272	+
LTR_loc	PBRW_043			33	II	3222626	3222658	+
LTR_loc	PBRC_044			121	II	3251535	3251655	-
LTR_loc	PBRC_045	beta		349	II	3282860	3283208	-
LTR_loc	PBRW_046			41	II	3464342	3464382	+
LTR_loc	PBRC_047			56	II	3474369	3474424	-
LTR_loc	PBRW_048			87	II	3474469	3474555	+
LTR_loc	PBRC_049	beta		349	II	3489303	3489651	-
LTR_loc	PBRC_050	iota		353	II	3489943	3490295	-
LTR_loc	PBRC_051	epsilon		284	II	3490313	3490596	-
LTR_loc	PBRC_052			348	II	3659043	3659390	-
LTR_loc	PBRW_053			338	II	3676732	3677069	+
LTR_loc	PBRC_054			350	II	3714033	3714382	-
LTR_loc	PBRW_055			54	II	3714197	3714250	+
LTR_loc	PBRW_056			62	II	3822451	3822512	+
LTR_loc	PBRC_057			76	II	3934659	3934734	-
LTR_loc	PBRW_058	beta		349	II	4047405	4047753	+
LTR_loc	PBRW_059			342	II	4160611	4160952	+
LTR_loc	PBRC_060	zeta		306	II	4160955	4161260	-
LTR_loc	PBRC_061			347	II	4217977	4218323	-
LTR_loc	PBRW_062	theta		343	II	4231527	4231869	+
LTR_loc	PBRW_063			53	II	4236142	4236194	+
LTR_loc	PBRW_064	alpha		358	II	4296668	4297025	+
LTR_loc	PBRW_065	epsilon		347	II	4409793	4410139	+
LTR_loc	PBRC_066			51	II	4409946	4409996	-
LTR_loc	PBRW_067	alpha	Tf2-11 5ÔLTR	298	II	4414192	4414489	+
LTR_loc	PBRW_068	beta	Tf2-11 3ÔLTR	349	II	4418709	4419057	+
LTR_loc	PBRC_069	gamma		282	II	4436890	4437171	-
LTR_loc	PBRW_071	beta		349	II	4437498	4437846	+
LTR_loc	PBRC_070			82	II	4437576	4437657	-
LTR_loc	PBRC_072			98	II	4438000	4438097	-
LTR_loc	PBRW_073			44	II	4475095	4475138	+
LTR_loc	PBRC_074			48	II	4475179	4475226	-
LTR_loc	PBRW_075			49	II	4481453	4481501	+
LTR_loc	PBRC_076	alpha		341	II	4481502	4481842	-
LTR_loc	PBRW_077			200	II	4481943	4482142	+
LTR_loc	PBRW_078			39	II	4501650	4501688	+
LTR_loc	PBRC_079			353	II	4507729	4508081	-
LTR_loc	PCLC_002			114	III	31728	31841	-
LTR_loc	PCLC_003	beta		349	III	43111	43459	-
LTR_loc	PCLW_004	zeta		334	III	49217	49550	+
LTR_loc	PCLW_005	zeta		308	III	108556	108863	+
LTR_loc	PCLC_006			140	III	111421	111560	-
LTR_loc	PCLC_007	beta		349	III	114382	114730	-
LTR_loc	PCLW_008	alpha		358	III	187086	187443	+
LTR_loc	PCLW_009			208	III	218449	218656	+
LTR_loc	PCLC_010			255	III	222992	223246	-
LTR_loc	PCLW_011			28	III	223256	223283	+
LTR_loc	PCLC_012		Tf-fragment4	76	III	254350	254425	-
LTR_loc	PCLC_013			349	III	257183	257531	-
LTR_loc	PCLC_014			358	III	286728	287085	-
LTR_loc	PCLC_015	delta		344	III	298547	298890	-
LTR_loc	PCLW_016	eta		328	III	298890	299217	+
LTR_loc	PCLC_017	beta		349	III	381641	381989	-
LTR_loc	PCLC_018			226	III	486575	486800	-
LTR_loc	PCLC_019	beta		325	III	489072	489396	-
LTR_loc	PCLW_020	alpha		323	III	489375	489697	+
LTR_loc	PCLW_021	alpha		358	III	499951	500308	+
LTR_loc	PCLC_022			180	III	500370	500549	-
LTR_loc	PCLC_023			142	III	552755	552896	-
LTR_loc	PCLW_024			359	III	614900	615258	+
LTR_loc	PCLW_025	beta		349	III	701782	702130	+
LTR_loc	PCLW_026			33	III	721297	721329	+
LTR_loc	PCLC_027	beta	Tf2-12 3'LTR	349	III	777734	778082	-
LTR_loc	PCLC_028	beta	Tf2-12 5'LTR	349	III	782301	782649	-
LTR_loc	PCLW_029	zeta		292	III	954569	954860	+
LTR_loc	PCLC_030			177	III	958713	958889	-
LTR_loc	PCLW_031			63	III	1016589	1016651	+
LTR_loc	PCRC_032			344	III	1176249	1176592	-
LTR_loc	PCRC_033		Tf-fragment5	75	III	1195985	1196059	-
LTR_loc	PCRW_034	alpha		357	III	1207147	1207503	+
LTR_loc	PCRC_035			44	III	1266527	1266570	-
LTR_loc	PCRW_036			309	III	1351212	1351520	+
LTR_loc	PCRW_037	beta		349	III	1400870	1401218	+
LTR_loc	PCRC_038	beta		318	III	1466109	1466426	-
LTR_loc	PCRW_039			197	III	1466484	1466680	+
LTR_loc	PCRW_040			367	III	1496536	1496902	+
LTR_loc	PCRW_041	beta		349	III	1530150	1530498	+
LTR_loc	PCRW_042	beta		348	III	1574724	1575071	+
LTR_loc	PCRC_043	zeta		351	III	1579176	1579526	-
LTR_loc	PCRC_044	beta		342	III	1581982	1582323	-
LTR_loc	PCRC_045			317	III	1629538	1629854	-
LTR_loc	PCRC_047	alpha		358	III	1632188	1632545	-
LTR_loc	PCRW_046			99	III	1632296	1632394	+
LTR_loc	PCRW_048			283	III	1684578	1684860	+
LTR_loc	PCRC_049	beta		349	III	1716281	1716629	-
LTR_loc	PCRC_050			241	III	1738418	1738658	-
LTR_loc	PCRW_051			30	III	1738653	1738682	+
LTR_loc	PCRC_052			347	III	1740961	1741307	-
LTR_loc	PCRC_053	delta		318	III	1808858	1809175	-
LTR_loc	PCRC_054	alpha		358	III	1862027	1862384	-
LTR_loc	PCRW_055	zeta		305	III	1894249	1894553	+
LTR_loc	PCRC_056	zeta		342	III	2017004	2017345	-
LTR_loc	PCRC_057			352	III	2021939	2022290	-
LTR_loc	PCRW_058	delta		343	III	2040799	2041141	+
LTR_loc	PCRC_059			73	III	2063817	2063889	-
LTR_loc	PCRW_060			239	III	2063902	2064140	+
LTR_loc	PCRW_061	alpha		357	III	2083919	2084275	+
LTR_loc	PCRC_062	eta		344	III	2108288	2108631	-
LTR_loc	PCRC_063			306	III	2110854	2111159	-
LTR_loc	PCRC_064	beta		349	III	2119789	2120137	-
LTR_loc	PCRW_065	delta		330	III	2145104	2145433	+
LTR_loc	PCRW_066			350	III	2147830	2148179	+
LTR_loc	PCRC_067	beta		349	III	2148154	2148502	-
LTR_loc	PCRC_068	beta		349	III	2158747	2159095	-
LTR_loc	PCRW_069	alpha		358	III	2180475	2180832	+
LTR_loc	PCRC_070			327	III	2210257	2210583	-
LTR_loc	PCRC_071	beta		349	III	2210640	2210988	-
LTR_loc	PCRC_072			332	III	2222691	2223022	-
LTR_loc	PCRW_073			101	III	2230054	2230154	+
LTR_loc	PCRC_074			349	III	2230367	2230715	-
LTR_loc	PCRC_075	beta	Tf2-13 3'LTR	349	III	2319921	2320269	-
LTR_loc	PCRC_076	beta	Tf2-13 5'LTR	349	III	2324487	2324835	-
LTR_loc	PCRW_077			332	III	2400868	2401199	+
LTR_loc	PCRC_078	epsilon		346	III	2405874	2406219	-
LTR_loc	PCRW_079	zeta		288	III	2418097	2418384	+
LTR_loc	PCRW_080	gamma		361	III	2422327	2422687	+
LTR_loc	PCRW_081			115	III	2432297	2432411	+
LTR_loc	PCLW_001			310	III	2437462	2437771	+

## Sheet: S6_SoloLTRs
#Supplementary Table S6. Summary table with number of solo LTRs and flanking LTRs sequences per sample and cluster differing by family and strand direction
ClusterID	Sample	VariantID	Num_Seq
9	Pomberef	other__Rev	2
9	Pomberef	zeta__For	1
9	JB22_EBC2	other__Rev	4
9	JB22_EBC2	zeta__For	2
9	JB879	other__Rev	2
9	JB879	zeta__For	1
9	JB760	other__Rev	2
9	JB760	zeta__For	1
9	JB760_EBC074	other__Rev	2
9	JB760_EBC074	zeta__For	1
9	JB869	other__Rev	2
9	JB869	zeta__For	1
9	JB4_EBC069	other__Rev	2
9	JB4_EBC069	zeta__For	1
9	JB4	other__Rev	2
9	JB4	zeta__For	2
9	JB873	zeta__For	1
9	JB873_EBC095	alpha__Rev	2
9	JB943	alpha__For	2
9	JB943	other__Rev	2
9	JB943	zeta__For	1
9	JB900_EBC131	gamma__Rev	1
9	JB900_EBC131	zeta__Rev	1
9	JB900_EBC132	gamma__Rev	1
9	JB900_EBC132	zeta__Rev	1
9	JB858_EBC087	zeta__For	1
9	JB872_EBC094	other__Rev	2
9	JB872_EBC094	zeta__For	1
9	JB853_EBC085	other__Rev	2
9	JB853_EBC085	zeta__For	2
9	JB939_EBC119	zeta__For	1
9	JB874	other__Rev	2
9	JB874	zeta__For	1
10	Pomberef	other__For	1
10	Pomberef	subiota__Rev	1
10	JB22_EBC2	other__For	2
10	JB22_EBC2	subiota__Rev	2
10	JB879	subiota__Rev	1
10	JB760	other__For	1
10	JB760	subiota__Rev	1
10	JB760_EBC074	other__For	1
10	JB760_EBC074	subiota__Rev	1
10	JB938	other__For	1
10	JB938	subiota__Rev	1
10	JB869	other__For	1
10	JB869	subiota__Rev	1
10	JB4_EBC069	other__For	1
10	JB4_EBC069	subiota__Rev	1
10	JB4	other__For	1
10	JB4	subiota__Rev	1
10	JB943	other__For	1
10	JB943	subiota__Rev	1
10	JB900_EBC131	beta__Rev	1
10	JB900_EBC131	epsilon__For	1
10	JB900_EBC131	gamma__For	2
10	JB900_EBC131	other__For	2
10	JB872_EBC094	beta__Rev	2
10	JB872_EBC094	other__For	1
10	JB872_EBC094	subiota__Rev	1
10	JB939_EBC119	zeta__For	1
10	JB874	beta__Rev	2
10	JB874	other__For	1
10	JB874	subiota__Rev	1
10	JB1205_EBC137	subiota__For	4
10	JB1205_EBC137	zeta__For	1
10	JB1205_EBC137	zeta__Rev	1
10	JB1206	subiota__For	4
10	JB1206_EBC138	subiota__For	4
11	JB1205_EBC137	subiota__For	1
11	JB1205_EBC137	subiota__Rev	1
11	JB1205_EBC137	zeta__For	1
11	JB1205_EBC137	zeta__Rev	1
11	JB1206	subiota__Rev	1
11	JB1206	zeta__For	1
11	JB1206	zeta__Rev	1
12	JB900_EBC132	epsilon__Rev	1
12	JB900_EBC132	other__Rev	1
13	JB900_EBC131	alpha__For	1
13	JB900_EBC131	alpha__Rev	6
13	JB900_EBC132	alpha__For	2
13	JB900_EBC132	alpha__Rev	2
14	Pomberef	gamma__For	1
14	Pomberef	other__For	1
14	Pomberef	other__Rev	2
14	Pomberef	zeta__Rev	1
14	JB22	gamma__For	1
14	JB22	other__For	1
14	JB22	other__Rev	2
14	JB22	zeta__Rev	1
14	JB22_EBC2	gamma__For	1
14	JB22_EBC2	other__For	1
14	JB22_EBC2	other__Rev	2
14	JB22_EBC2	zeta__Rev	1
14	JB879	gamma__For	1
14	JB879	other__For	1
14	JB879	other__Rev	2
14	JB879	zeta__Rev	1
14	JB760	gamma__For	1
14	JB760	other__For	1
14	JB760	other__Rev	2
14	JB760	zeta__Rev	1
14	JB760_EBC074	gamma__For	1
14	JB760_EBC074	other__For	1
14	JB760_EBC074	other__Rev	2
14	JB760_EBC074	zeta__Rev	1
14	JB938	gamma__For	1
14	JB938	other__For	1
14	JB938	other__Rev	2
14	JB938	zeta__Rev	1
14	JB869	gamma__For	1
14	JB869	other__For	1
14	JB869	other__Rev	2
14	JB869	zeta__Rev	1
14	JB4_EBC069	gamma__For	1
14	JB4_EBC069	other__For	1
14	JB4_EBC069	other__Rev	2
14	JB4_EBC069	zeta__Rev	1
14	JB4	gamma__For	1
14	JB4	other__For	1
14	JB4	other__Rev	2
14	JB4	zeta__Rev	1
14	JB918_EBC111	epsilon__Rev	1
14	JB918_EBC111	gamma__For	2
14	JB918_EBC111	other__For	1
14	JB918_EBC111	other__Rev	2
14	JB918_EBC111	subiota__For	2
14	JB918_EBC111	zeta__Rev	1
14	JB1110_EBC121	gamma__For	3
14	JB1110_EBC121	other__For	1
14	JB1110_EBC121	other__Rev	2
14	JB1110_EBC121	zeta__Rev	1
14	JB873	gamma__For	1
14	JB873	other__For	1
14	JB873	other__Rev	2
14	JB873	zeta__Rev	1
14	JB873_EBC095	gamma__For	1
14	JB873_EBC095	other__For	1
14	JB873_EBC095	other__Rev	2
14	JB873_EBC095	zeta__Rev	1
14	JB929	gamma__For	1
14	JB929	other__For	1
14	JB943	gamma__For	1
14	JB943	other__For	1
14	JB943	other__Rev	2
14	JB943	zeta__Rev	1
14	JB900_EBC131	gamma__For	2
14	JB900_EBC131	other__For	2
14	JB900_EBC131	other__Rev	2
14	JB900_EBC131	zeta__Rev	1
14	JB900_EBC132	gamma__For	2
14	JB900_EBC132	other__For	2
14	JB900_EBC132	other__Rev	2
14	JB900_EBC132	zeta__Rev	1
14	JB854	epsilon__Rev	1
14	JB854	other__For	1
14	JB854	subiota__For	2
14	JB1180	gamma__For	1
14	JB1180	other__For	1
14	JB1180	other__Rev	2
14	JB1180	zeta__Rev	1
14	JB858_EBC087	epsilon__Rev	1
14	JB858_EBC087	other__For	1
14	JB858_EBC087	subiota__For	2
14	JB842_EBC080	epsilon__Rev	1
14	JB842_EBC080	other__For	1
14	JB842_EBC080	subiota__For	2
14	JB840	epsilon__Rev	1
14	JB840	other__For	1
14	JB840	subiota__For	2
14	JB872_EBC094	gamma__For	1
14	JB872_EBC094	other__For	1
14	JB872_EBC094	other__Rev	2
14	JB872_EBC094	zeta__Rev	1
14	JB853_EBC085	epsilon__Rev	1
14	JB853_EBC085	other__For	1
14	JB853_EBC085	subiota__For	2
14	JB874	gamma__For	1
14	JB874	other__For	1
14	JB874	other__Rev	2
14	JB874	zeta__Rev	1
14	JB1205_EBC137	epsilon__Rev	1
14	JB1205_EBC137	other__For	1
14	JB1205_EBC137	subiota__For	2
14	JB1197_EBC135	epsilon__Rev	1
14	JB1197_EBC135	other__For	1
14	JB1197_EBC135	subiota__For	2
14	JB953	epsilon__For	1
14	JB953	other__Rev	1
14	JB953	subiota__Rev	2
14	JB837	epsilon__Rev	1
14	JB837	other__For	1
14	JB837	subiota__For	2
14	JB1206	epsilon__Rev	1
14	JB1206	other__For	1
14	JB1206	subiota__For	2
14	JB1206_EBC138	epsilon__Rev	1
14	JB1206_EBC138	other__For	1
14	JB1206_EBC138	subiota__For	2
14	JB758	epsilon__Rev	1
14	JB758	subiota__For	2
14	DY34373	epsilon__Rev	1
14	DY34373	other__Rev	1
14	DY34373	subiota__For	2
14	DY39827	epsilon__Rev	1
14	DY39827	other__For	1
14	DY39827	subiota__For	2
15	JB918_EBC111	beta__Rev	2
15	JB929	epsilon__For	1
15	JB929	subiota__Rev	2
16	JB758	alpha__Rev	2
17	Pomberef	other__For	1
17	Pomberef	other__Rev	1
17	JB22	other__For	1
17	JB22	other__Rev	1
17	JB22_EBC2	other__For	1
17	JB22_EBC2	other__Rev	1
17	JB879	other__For	1
17	JB879	other__Rev	1
17	JB760	other__For	1
17	JB760	other__Rev	1
17	JB760_EBC074	other__For	1
17	JB760_EBC074	other__Rev	1
17	JB938	other__For	1
17	JB938	other__Rev	1
17	JB869	other__For	1
17	JB869	other__Rev	1
17	JB4_EBC069	other__For	1
17	JB4_EBC069	other__Rev	1
17	JB4	other__For	1
17	JB4	other__Rev	1
17	JB918_EBC111	beta__Rev	2
17	JB918_EBC111	other__For	1
17	JB1110_EBC121	other__For	1
17	JB1110_EBC121	other__Rev	1
17	JB873	other__For	1
17	JB873	other__Rev	1
17	JB873_EBC095	other__For	1
17	JB873_EBC095	other__Rev	1
17	JB943	other__For	1
17	JB943	other__Rev	1
17	JB900_EBC131	other__For	1
17	JB900_EBC131	other__Rev	1
17	JB900_EBC132	other__For	1
17	JB900_EBC132	other__Rev	1
17	JB1180	alpha__For	1
17	JB1180	other__For	1
17	JB1180	other__Rev	1
17	JB872_EBC094	other__For	1
17	JB872_EBC094	other__Rev	1
17	JB939_EBC119	other__For	1
17	JB874	other__For	1
17	JB874	other__Rev	1
17	JB953	beta__For	2
17	JB837	alpha__For	2
17	JB837	beta__For	2
18	JB842_EBC080	beta__For	2
19	Pomberef	delta_gamma__For	1
19	JB22	delta_gamma__For	1
19	JB22_EBC2	delta_gamma__For	1
19	JB760	delta_gamma__For	1
19	JB760_EBC074	delta_gamma__For	1
19	JB938	delta_gamma__For	1
19	JB869	delta_gamma__For	1
19	JB4_EBC069	delta_gamma__For	1
19	JB4	delta_gamma__For	1
19	JB918_EBC111	delta_gamma__For	1
19	JB1110_EBC121	delta_gamma__For	1
19	JB873	delta_gamma__For	1
19	JB873_EBC095	delta_gamma__For	1
19	JB929	delta_gamma__For	1
19	JB934_EBC115	delta_gamma__For	1
19	JB943	delta_gamma__For	1
19	JB900_EBC131	delta_gamma__For	1
19	JB900_EBC132	delta_gamma__For	1
19	JB854	delta_gamma__For	1
19	JB1180	delta_gamma__For	1
19	JB858_EBC087	delta_gamma__For	1
19	JB842_EBC080	delta_gamma__For	1
19	JB840	delta_gamma__For	1
19	JB872_EBC094	delta_gamma__For	1
19	JB853_EBC085	delta_gamma__For	1
19	JB939_EBC119	delta_gamma__For	1
19	JB874	delta_gamma__For	1
19	JB1205_EBC137	delta_gamma__For	1
19	JB1197_EBC135	delta_gamma__For	1
19	JB953	delta_gamma__For	1
19	JB837	delta_gamma__For	1
19	JB1206	delta_gamma__For	1
19	JB1206_EBC138	delta_gamma__For	1
19	JB864	delta_gamma__For	1
19	JB758	delta_gamma__For	1
19	DY34373	delta_gamma__For	1
19	DY39827	delta_gamma__For	1
20	JB837	beta__For	2
22	JB953	beta__For	1
23	JB900_EBC131	beta__Rev	2
23	JB900_EBC132	beta__Rev	2
24	JB853_EBC085	beta__For	1
25	JB874	beta__For	2
26	JB943	alpha__Rev	1
26	JB874	alpha__Rev	2
27	JB918_EBC111	alpha__For	4
27	JB1110_EBC121	alpha__For	2
28	JB918_EBC111	alpha__Rev	2
31	JB900_EBC131	alpha__For	2
31	JB900_EBC132	alpha__For	2
32	JB1180	alpha__For	1
32	JB1180	alpha__Rev	4
32	JB1180	beta__For	1
33	JB1180	alpha__Rev	2
34	Pomberef	beta__Rev	1
34	JB22	beta__Rev	1
34	JB22_EBC2	beta__Rev	1
34	JB879	beta__Rev	1
34	JB760	beta__Rev	1
34	JB760_EBC074	beta__Rev	1
34	JB938	beta__Rev	1
34	JB869	beta__Rev	1
34	JB900_EBC131	beta__For	2
34	JB900_EBC132	beta__For	2
34	JB854	beta__Rev	1
34	JB853_EBC085	beta__For	2
34	JB939_EBC119	beta__Rev	1
35	Pomberef	gamma__For	1
35	JB22	gamma__For	1
35	JB22_EBC2	gamma__For	1
35	JB879	gamma__For	1
35	JB760	gamma__For	1
35	JB760_EBC074	gamma__For	1
35	JB938	gamma__For	1
35	JB869	gamma__For	1
35	JB4_EBC069	gamma__For	1
35	JB4	gamma__For	1
35	JB918_EBC111	gamma__For	1
35	JB1110_EBC121	gamma__For	1
35	JB873	beta__For	2
35	JB873	gamma__For	1
35	JB873	gamma_iota__For	1
35	JB873_EBC095	beta__For	2
35	JB873_EBC095	beta__Rev	2
35	JB929	beta__Rev	2
35	JB929	gamma__For	1
35	JB934_EBC115	gamma__For	1
35	JB943	gamma__For	1
35	JB900_EBC131	gamma__For	1
35	JB900_EBC132	gamma__For	1
35	JB854	gamma__For	1
35	JB1180	gamma__For	1
35	JB858_EBC087	beta__For	1
35	JB858_EBC087	gamma__For	1
35	JB842_EBC080	beta__Rev	2
35	JB842_EBC080	gamma__For	1
35	JB840	gamma__For	1
35	JB872_EBC094	gamma__For	1
35	JB853_EBC085	gamma__For	1
35	JB939_EBC119	gamma__For	1
35	JB874	gamma__For	1
35	JB1205_EBC137	gamma__For	1
35	JB1197_EBC135	gamma__For	1
35	JB953	gamma__For	1
35	JB837	gamma__For	1
35	JB1206	gamma__For	1
35	JB1206_EBC138	gamma__For	1
35	JB864	gamma__For	1
35	JB758	gamma__For	1
35	DY34373	gamma__For	1
35	DY39827	gamma__For	1
36	JB858_EBC087	beta__For	2
37	JB758	alpha__Rev	1
38	JB900_EBC131	alpha__Rev	2
38	JB900_EBC132	alpha__Rev	2
38	JB874	alpha__For	1
39	Pomberef	other__Rev	1
39	JB22	other__Rev	1
39	JB22_EBC2	other__Rev	1
39	JB879	other__Rev	1
39	JB760	other__Rev	1
39	JB760_EBC074	other__Rev	1
39	JB938	other__Rev	1
39	JB869	other__Rev	1
39	JB4_EBC069	other__Rev	1
39	JB4	other__Rev	1
39	JB918_EBC111	other__Rev	1
39	JB1110_EBC121	other__Rev	1
39	JB873_EBC095	other__Rev	1
39	JB929	other__Rev	1
39	JB934_EBC115	other__Rev	1
39	JB943	other__Rev	1
39	JB900_EBC131	other__Rev	1
39	JB900_EBC132	other__Rev	1
39	JB854	other__Rev	1
39	JB1180	other__Rev	1
39	JB858_EBC087	other__Rev	1
39	JB842_EBC080	other__Rev	1
39	JB840	other__Rev	1
39	JB872_EBC094	other__Rev	1
39	JB853_EBC085	other__Rev	1
39	JB939_EBC119	other__Rev	1
39	JB874	other__Rev	1
39	JB1205_EBC137	other__Rev	1
39	JB1197_EBC135	other__Rev	1
39	JB953	other__Rev	1
39	JB837	other__Rev	1
39	JB1206	other__Rev	1
39	JB1206_EBC138	other__Rev	1
39	JB864	other__Rev	1
39	JB758	other__Rev	1
39	DY34373	other__Rev	1
39	DY39827	other__Rev	1
40	JB858_EBC087	beta__For	2
41	JB1110_EBC121	beta__For	2
41	JB1110_EBC121	beta__Rev	16
41	JB929	beta__For	2
41	JB874	beta__For	2
42	JB872_EBC094	alpha__For	2
43	Pomberef	subalpha__For	1
43	JB22	subalpha__For	1
43	JB22_EBC2	subalpha__For	1
43	JB879	subalpha__For	1
43	JB760	subalpha__For	1
43	JB760_EBC074	subalpha__For	1
43	JB938	subalpha__For	1
43	JB869	subalpha__For	1
43	JB4_EBC069	subalpha__For	1
43	JB4	subalpha__For	1
43	JB918_EBC111	subalpha__For	1
43	JB1110_EBC121	subalpha__For	1
43	JB873	subalpha__For	1
43	JB873_EBC095	subalpha__For	1
43	JB929	subalpha__For	1
43	JB934_EBC115	subalpha__For	1
43	JB943	subalpha__For	1
43	JB900_EBC131	subalpha__For	1
43	JB900_EBC132	subalpha__For	1
43	JB854	subalpha__For	1
43	JB1180	subalpha__For	1
43	JB858_EBC087	subalpha__For	1
43	JB842_EBC080	subalpha__For	1
43	JB840	subalpha__For	1
43	JB872_EBC094	subalpha__For	1
43	JB853_EBC085	subalpha__For	1
43	JB939_EBC119	subalpha__For	1
43	JB874	alpha__For	2
43	JB1205_EBC137	subalpha__For	1
43	JB1197_EBC135	subalpha__For	1
43	JB953	subalpha__For	1
43	JB837	subalpha__For	1
43	JB1206	subalpha__For	1
43	JB1206_EBC138	subalpha__For	1
43	JB864	subalpha__For	1
43	JB758	subalpha__For	1
43	DY34373	subalpha__For	1
43	DY39827	subalpha__For	1
44	JB760	beta__For	2
44	JB760_EBC074	beta__For	2
45	JB918_EBC111	beta__For	2
45	JB873	beta__For	1
45	JB873	beta__Rev	1
45	JB873_EBC095	beta__For	2
45	JB1180	alpha__For	2
46	JB918_EBC111	beta__Rev	2
46	JB842_EBC080	beta__For	2
47	Pomberef	beta_delta__Rev	1
47	JB22	beta_delta__Rev	1
47	JB22_EBC2	beta_delta__Rev	1
47	JB879	beta_delta__Rev	1
47	JB760	beta_delta__Rev	1
47	JB760_EBC074	beta_delta__Rev	1
47	JB938	beta_delta__Rev	1
47	JB869	beta_delta__Rev	1
47	JB4_EBC069	beta_delta__Rev	1
47	JB4	beta_delta__Rev	1
47	JB918_EBC111	beta_delta__Rev	1
47	JB1110_EBC121	beta_delta__Rev	1
47	JB873	beta_delta__Rev	1
47	JB873_EBC095	beta_delta__Rev	1
47	JB929	beta_delta__Rev	1
47	JB934_EBC115	beta_delta__Rev	1
47	JB943	beta_delta__Rev	1
47	JB900_EBC131	beta_delta__Rev	1
47	JB900_EBC132	beta_delta__Rev	1
47	JB854	beta_delta__Rev	1
47	JB1180	beta_delta__Rev	1
47	JB858_EBC087	beta_delta__Rev	1
47	JB842_EBC080	beta_delta__Rev	1
47	JB840	beta_delta__Rev	1
47	JB872_EBC094	beta_delta__Rev	1
47	JB853_EBC085	beta_delta__Rev	1
47	JB939_EBC119	beta_delta__Rev	1
47	JB874	beta_delta__Rev	1
47	JB1205_EBC137	beta_delta__Rev	1
47	JB1197_EBC135	beta_delta__Rev	1
47	JB953	beta_delta__Rev	1
47	JB837	beta_delta__Rev	1
47	JB1206	beta_delta__Rev	1
47	JB1206_EBC138	beta_delta__Rev	1
47	JB864	beta_delta__Rev	1
47	JB758	beta_delta__Rev	1
47	DY34373	beta_delta__Rev	1
47	DY39827	beta_delta__Rev	1
48	JB900_EBC131	alpha__Rev	2
48	JB900_EBC132	alpha__Rev	2
48	JB872_EBC094	alpha__Rev	2
48	JB1205_EBC137	alpha__Rev	2
49	JB943	beta__Rev	1
50	JB918_EBC111	beta__For	2
51	JB1205_EBC137	alpha__Rev	2
52	JB1110_EBC121	alpha__For	2
53	JB1206	alpha__For	1
53	JB1206_EBC138	alpha__For	1
53	JB758	alpha__For	1
53	DY34373	alpha__For	1
53	DY39827	alpha__For	1
54	JB1205_EBC137	beta__Rev	2
55	JB758	beta__For	2
56	JB4_EBC069	iota__Rev	1
56	JB4	iota__Rev	1
56	JB918_EBC111	iota__Rev	1
56	JB873	iota__Rev	1
56	JB873_EBC095	iota__Rev	1
56	JB929	iota__Rev	1
56	JB934_EBC115	iota__Rev	1
56	JB854	iota__Rev	1
56	JB1180	iota__Rev	1
56	JB858_EBC087	iota__Rev	1
56	JB842_EBC080	iota__Rev	1
56	JB840	iota__Rev	1
56	JB872_EBC094	iota__Rev	1
56	JB853_EBC085	iota__Rev	1
56	JB874	iota__Rev	1
56	JB1197_EBC135	iota__Rev	1
56	JB953	iota__Rev	1
56	JB837	iota__Rev	1
56	JB1206	iota__Rev	1
56	JB1206_EBC138	iota__Rev	1
56	JB864	iota__Rev	1
56	JB758	iota__Rev	1
56	DY34373	iota__Rev	1
56	DY39827	iota__Rev	1
57	JB1180	alpha__For	2
59	JB842_EBC080	beta__Rev	2
60	JB873	beta__Rev	1
60	JB873_EBC095	beta__Rev	1
61	JB842_EBC080	beta__Rev	2
62	JB837	beta__Rev	2
63	JB858_EBC087	beta__For	2
64	JB758	alpha__For	1
65	JB872_EBC094	beta__For	1
66	Pomberef	subalpha__For	1
66	JB22	subalpha__For	1
66	JB22_EBC2	subalpha__For	1
66	JB879	subalpha__For	1
66	JB760	subalpha__For	1
66	JB760_EBC074	subalpha__For	1
66	JB938	subalpha__For	1
66	JB869	subalpha__For	1
66	JB4_EBC069	subalpha__For	1
66	JB4	subalpha__For	1
66	JB918_EBC111	subalpha__For	1
66	JB1110_EBC121	subalpha__For	1
66	JB873	subalpha__For	1
66	JB873_EBC095	subalpha__For	1
66	JB929	subalpha__For	1
66	JB943	beta__For	4
66	JB943	subalpha__For	1
66	JB858_EBC087	subalpha__For	1
66	JB842_EBC080	subalpha__For	1
66	JB872_EBC094	subalpha__For	1
66	JB874	subalpha__For	1
66	JB1205_EBC137	subalpha__For	1
66	JB837	alpha__Rev	2
66	JB1206	subalpha__For	1
66	JB1206_EBC138	subalpha__For	1
67	JB842_EBC080	beta__Rev	2
68	Pomberef	other__For	1
68	JB22	other__For	1
68	JB22_EBC2	other__For	1
68	JB879	other__For	1
68	JB760	other__For	1
68	JB760_EBC074	other__For	1
68	JB938	other__For	1
68	JB869	other__For	1
68	JB4_EBC069	other__For	1
68	JB4	other__For	1
68	JB918_EBC111	other__For	1
68	JB1110_EBC121	other__For	1
68	JB873	other__For	1
68	JB873_EBC095	other__For	1
68	JB929	other__For	1
68	JB934_EBC115	other__For	1
68	JB943	other__For	1
68	JB900_EBC131	other__For	1
68	JB900_EBC132	other__For	1
68	JB854	other__For	1
68	JB1180	other__For	1
68	JB858_EBC087	other__For	1
68	JB842_EBC080	alpha__Rev	2
68	JB840	other__For	1
68	JB872_EBC094	other__For	1
68	JB853_EBC085	other__For	1
68	JB939_EBC119	other__For	1
68	JB874	other__For	1
68	JB1205_EBC137	other__For	1
68	JB1197_EBC135	other__For	1
68	JB953	other__For	1
68	JB837	other__For	1
68	JB1206	other__For	1
68	JB1206_EBC138	other__For	1
68	JB864	other__For	1
68	JB758	other__For	1
68	DY34373	other__For	1
68	DY39827	other__For	1
69	JB929	alpha__For	1
70	JB918_EBC111	alpha__For	4
71	JB842_EBC080	beta__Rev	2
72	Pomberef	other__For	1
72	JB22	other__For	1
72	JB22_EBC2	other__For	1
72	JB879	other__For	1
72	JB760	other__For	1
72	JB760_EBC074	other__For	1
72	JB938	other__For	1
72	JB869	other__For	1
72	JB4_EBC069	other__For	1
72	JB4	other__For	1
72	JB918_EBC111	other__For	1
72	JB1110_EBC121	beta__Rev	2
72	JB1110_EBC121	other__For	1
72	JB873	other__For	1
72	JB873_EBC095	other__For	1
72	JB929	other__For	1
72	JB934_EBC115	other__For	1
72	JB943	beta__For	2
72	JB900_EBC131	other__For	1
72	JB900_EBC132	other__For	1
72	JB854	other__For	1
72	JB1180	other__For	1
72	JB858_EBC087	other__For	1
72	JB842_EBC080	other__For	1
72	JB840	other__For	1
72	JB872_EBC094	other__For	1
72	JB853_EBC085	other__For	1
72	JB939_EBC119	other__For	1
72	JB874	other__For	1
72	JB1205_EBC137	other__For	1
72	JB1197_EBC135	other__For	1
72	JB953	other__For	1
72	JB837	other__For	1
72	JB1206	other__For	1
72	JB1206_EBC138	other__For	1
72	JB864	other__For	1
72	JB758	other__For	1
72	DY34373	other__For	1
72	DY39827	other__For	1
73	JB918_EBC111	alpha__Rev	1
73	JB1110_EBC121	alpha__Rev	1
73	JB934_EBC115	alpha__Rev	1
73	JB943	alpha__Rev	1
73	JB900_EBC131	alpha__Rev	1
73	JB900_EBC132	alpha__Rev	1
73	JB1180	alpha__Rev	1
73	JB874	alpha__Rev	1
73	JB953	alpha__Rev	1
74	Pomberef	subalpha__For	1
74	JB22	gamma_iota__For	1
74	JB22_EBC2	subalpha__For	1
74	JB879	subalpha__For	1
74	JB760	subalpha__For	1
74	JB760_EBC074	subalpha__For	1
74	JB938	subalpha__For	1
74	JB869	subalpha__For	1
74	JB4_EBC069	subalpha__For	1
74	JB4	subalpha__For	1
74	JB918_EBC111	subalpha__For	1
74	JB1110_EBC121	subalpha__For	1
74	JB873	subalpha__For	1
74	JB873_EBC095	subalpha__For	1
74	JB929	subalpha__For	1
74	JB934_EBC115	subalpha__For	1
74	JB943	subalpha__For	1
74	JB900_EBC131	subalpha__For	1
74	JB900_EBC132	subalpha__For	1
74	JB854	subalpha__For	1
74	JB1180	subalpha__For	1
74	JB858_EBC087	subalpha__For	1
74	JB842_EBC080	subalpha__For	1
74	JB840	subalpha__For	1
74	JB872_EBC094	subalpha__For	1
74	JB853_EBC085	subalpha__For	1
74	JB939_EBC119	subalpha__For	1
74	JB874	subalpha__For	1
74	JB1205_EBC137	subalpha__For	1
74	JB1197_EBC135	subalpha__For	1
74	JB953	subalpha__For	1
74	JB837	subalpha__For	1
74	JB1206	subalpha__For	1
74	JB1206_EBC138	subalpha__For	1
74	JB864	subalpha__For	1
74	JB758	subalpha__For	1
74	DY34373	subalpha__For	1
74	DY39827	subalpha__For	1
75	Pomberef	iota__Rev	1
75	JB22	iota__Rev	1
75	JB22_EBC2	iota__Rev	1
75	JB879	iota__Rev	1
75	JB760	iota__Rev	1
75	JB760_EBC074	iota__Rev	1
75	JB938	iota__Rev	1
75	JB869	iota__Rev	1
75	JB4_EBC069	iota__Rev	1
75	JB4	iota__Rev	1
75	JB918_EBC111	iota__Rev	1
75	JB1110_EBC121	iota__Rev	1
75	JB873	iota__Rev	1
75	JB873_EBC095	iota__Rev	1
75	JB929	iota__Rev	1
75	JB934_EBC115	iota__Rev	1
75	JB943	iota__Rev	1
75	JB900_EBC131	iota__Rev	1
75	JB900_EBC132	iota__Rev	1
75	JB854	iota__Rev	1
75	JB1180	iota__Rev	1
75	JB858_EBC087	iota__Rev	1
75	JB842_EBC080	iota__Rev	1
75	JB840	iota__Rev	1
75	JB872_EBC094	iota__Rev	1
75	JB853_EBC085	iota__Rev	1
75	JB939_EBC119	iota__Rev	1
75	JB874	iota__Rev	1
75	JB1205_EBC137	iota__Rev	1
75	JB1197_EBC135	iota__Rev	1
75	JB953	iota__Rev	1
75	JB837	iota__Rev	1
75	JB1206	iota__Rev	1
75	JB1206_EBC138	iota__Rev	1
75	JB864	iota__Rev	1
75	JB758	iota__Rev	1
75	DY34373	iota__Rev	1
75	DY39827	iota__Rev	1
76	JB929	alpha__Rev	2
76	JB758	beta__Rev	1
77	Pomberef	subiota__For	1
77	JB22	subiota__For	1
77	JB22_EBC2	subiota__For	1
77	JB879	subiota__For	1
77	JB760	subiota__For	1
77	JB760_EBC074	subiota__For	1
77	JB938	subiota__For	1
77	JB869	subiota__For	1
77	JB4_EBC069	subiota__For	1
77	JB4	subiota__For	1
77	JB918_EBC111	subiota__For	1
77	JB1110_EBC121	alpha__For	3
77	JB1110_EBC121	alpha__Rev	3
77	JB873	subiota__For	1
77	JB873_EBC095	subiota__For	1
77	JB929	subiota__For	1
77	JB934_EBC115	subiota__For	1
77	JB900_EBC131	alpha__For	2
77	JB900_EBC132	alpha__For	2
77	JB854	subiota__For	1
77	JB858_EBC087	subiota__For	1
77	JB842_EBC080	subiota__For	1
77	JB840	subiota__For	1
77	JB853_EBC085	subiota__For	1
77	JB939_EBC119	subiota__For	1
77	JB1205_EBC137	subiota__For	1
77	JB837	subiota__For	1
77	JB1206	subiota__For	1
77	JB1206_EBC138	subiota__For	1
77	JB864	subiota__For	1
77	JB758	subiota__For	1
77	DY34373	subiota__For	1
77	DY39827	subiota__For	1
78	JB929	alpha__Rev	2
79	JB874	alpha__Rev	2
80	Pomberef	subalpha__Rev	1
80	JB22	subalpha__Rev	1
80	JB22_EBC2	subalpha__Rev	1
80	JB760	subalpha__Rev	1
80	JB760_EBC074	subalpha__Rev	1
80	JB938	subalpha__Rev	2
80	JB869	subalpha__Rev	1
80	JB4_EBC069	subalpha__Rev	1
80	JB4	subalpha__Rev	1
80	JB918_EBC111	subalpha__Rev	1
80	JB1110_EBC121	subalpha__Rev	1
80	JB873	subalpha__Rev	1
80	JB873_EBC095	subalpha__Rev	1
80	JB929	subalpha__Rev	1
80	JB934_EBC115	subalpha__Rev	1
80	JB943	subalpha__Rev	1
80	JB1180	subalpha__Rev	1
80	JB858_EBC087	subalpha__Rev	1
80	JB842_EBC080	subalpha__Rev	1
80	JB840	subalpha__Rev	1
80	JB853_EBC085	subalpha__Rev	1
80	JB874	subalpha__Rev	1
80	JB1205_EBC137	subalpha__Rev	1
80	JB1206	subalpha__Rev	1
80	JB1206_EBC138	subalpha__Rev	1
81	JB872_EBC094	alpha__Rev	1
81	JB1205_EBC137	alpha__Rev	2
81	JB953	alpha__Rev	1
81	JB1206	alpha__For	2
81	JB1206	alpha__Rev	2
81	JB1206_EBC138	alpha__Rev	2
82	JB758	beta__For	1
83	JB1180	beta__For	2
84	JB758	alpha__Rev	1
85	Pomberef	other__For	1
85	JB22	other__For	1
85	JB22_EBC2	other__For	1
85	JB879	beta__For	2
85	JB760	other__For	1
85	JB760_EBC074	other__For	1
85	JB938	other__For	1
85	JB869	other__For	1
85	JB4_EBC069	other__For	1
85	JB4	other__For	1
85	JB918_EBC111	other__For	1
85	JB1110_EBC121	other__For	1
85	JB873	other__For	1
85	JB873_EBC095	other__For	1
85	JB929	other__For	1
85	JB934_EBC115	other__For	1
85	JB943	other__For	1
85	JB900_EBC131	other__For	1
85	JB900_EBC132	other__For	1
85	JB854	other__For	1
85	JB1180	other__For	1
85	JB858_EBC087	other__For	1
85	JB842_EBC080	other__For	1
85	JB840	other__For	1
85	JB872_EBC094	other__For	1
85	JB853_EBC085	other__For	1
85	JB939_EBC119	other__For	1
85	JB874	other__For	1
85	JB1205_EBC137	other__For	1
85	JB1197_EBC135	other__For	1
85	JB953	other__For	1
85	JB837	other__For	1
85	JB1206	other__For	1
85	JB1206_EBC138	other__For	1
85	JB864	other__For	1
85	JB758	beta__Rev	1
85	JB758	other__For	1
85	DY34373	other__For	1
85	DY39827	other__For	1
86	JB854	beta__Rev	1
87	JB842_EBC080	beta__Rev	2
88	JB918_EBC111	beta__For	2
89	Pomberef	other__For	1
89	JB22	other__For	1
89	JB22_EBC2	other__For	1
89	JB879	other__For	1
89	JB760	other__For	1
89	JB760_EBC074	other__For	1
89	JB938	other__For	1
89	JB869	other__For	1
89	JB4_EBC069	other__For	1
89	JB4	other__For	1
89	JB918_EBC111	other__For	1
89	JB1110_EBC121	other__For	1
89	JB873	other__For	1
89	JB873_EBC095	other__For	1
89	JB929	other__For	1
89	JB934_EBC115	other__For	1
89	JB943	other__For	1
89	JB900_EBC131	other__For	1
89	JB900_EBC132	other__For	1
89	JB854	other__For	1
89	JB1180	other__For	1
89	JB858_EBC087	other__For	1
89	JB842_EBC080	other__For	1
89	JB840	other__For	1
89	JB872_EBC094	other__For	1
89	JB853_EBC085	other__For	1
89	JB939_EBC119	other__For	1
89	JB874	other__For	1
89	JB1205_EBC137	other__For	1
89	JB1197_EBC135	other__For	1
89	JB953	other__For	1
89	JB837	other__For	1
89	JB1206	other__For	1
89	JB1206_EBC138	other__For	1
89	JB864	other__For	1
89	JB758	other__For	1
89	DY34373	other__For	1
89	DY39827	other__For	1
90	Pomberef	beta__For	2
90	JB22	beta__For	2
90	JB22_EBC2	beta__For	2
90	JB760	beta__For	1
90	JB760	gamma_iota__For	1
90	JB760_EBC074	beta__For	2
90	JB918_EBC111	alpha__Rev	2
91	JB900_EBC131	alpha__Rev	2
91	JB900_EBC132	alpha__Rev	2
93	JB842_EBC080	beta__For	1
94	JB840	beta__Rev	2
94	JB1205_EBC137	alpha__Rev	2
94	JB1206	alpha__Rev	2
94	JB1206_EBC138	alpha__Rev	2
95	JB874	alpha__For	2
95	JB1205_EBC137	alpha__Rev	2
95	JB837	beta__For	2
95	JB1206	alpha__Rev	2
95	JB1206_EBC138	alpha__Rev	2
96	JB1197_EBC135	alpha__Rev	2
97	Pomberef	beta__Rev	2
97	JB22	beta__Rev	2
97	JB22_EBC2	beta__Rev	2
97	JB879	beta__Rev	2
97	JB760	beta__Rev	2
97	JB760_EBC074	beta__Rev	2
97	JB938	beta__Rev	2
97	JB869	beta__Rev	2
97	JB4_EBC069	beta__Rev	1
97	JB4	beta__Rev	1
97	JB918_EBC111	alpha__Rev	1
97	JB918_EBC111	beta__Rev	1
97	JB1110_EBC121	alpha__Rev	1
97	JB1110_EBC121	beta__Rev	2
97	JB873	beta__Rev	2
97	JB873	gamma_iota__Rev	1
97	JB873_EBC095	beta__Rev	5
97	JB929	beta__Rev	2
97	JB934_EBC115	beta__Rev	1
97	JB943	beta__Rev	1
97	JB900_EBC131	beta__Rev	1
97	JB900_EBC132	beta__Rev	1
97	JB854	beta__Rev	2
97	JB1180	beta__Rev	1
97	JB858_EBC087	beta__Rev	5
97	JB842_EBC080	beta__Rev	1
97	JB840	beta__Rev	2
97	JB872_EBC094	beta__Rev	1
97	JB853_EBC085	beta__Rev	2
97	JB837	alpha__Rev	4
97	JB837	beta__Rev	1
98	JB837	beta__For	1
99	JB1110_EBC121	alpha__Rev	2
100	JB918_EBC111	beta__Rev	2
101	Pomberef	epsilon__For	1
101	JB22	epsilon__For	1
101	JB22_EBC2	epsilon__For	1
101	JB879	beta__Rev	2
101	JB879	epsilon__For	1
101	JB760	beta__Rev	2
101	JB760	epsilon__For	1
101	JB760_EBC074	beta__Rev	2
101	JB760_EBC074	epsilon__For	1
101	JB938	epsilon__For	1
101	JB869	epsilon__For	1
101	JB4_EBC069	epsilon__For	1
101	JB4	epsilon__For	1
101	JB918_EBC111	epsilon__For	1
101	JB1110_EBC121	epsilon__For	1
101	JB873	epsilon__For	1
101	JB873_EBC095	epsilon__For	1
101	JB929	epsilon__For	1
101	JB934_EBC115	epsilon__For	1
101	JB943	epsilon__For	1
101	JB900_EBC131	epsilon__For	1
101	JB900_EBC132	epsilon__For	1
101	JB854	epsilon__For	1
101	JB1180	epsilon__For	1
101	JB858_EBC087	epsilon__For	1
101	JB842_EBC080	epsilon__For	1
101	JB840	epsilon__For	1
101	JB872_EBC094	epsilon__For	1
101	JB853_EBC085	epsilon__For	1
101	JB939_EBC119	epsilon__For	1
101	JB874	epsilon__For	1
101	JB1205_EBC137	epsilon__For	1
101	JB1197_EBC135	epsilon__For	1
101	JB953	epsilon__For	1
101	JB837	epsilon__For	1
101	JB1206	epsilon__For	1
101	JB1206_EBC138	epsilon__For	1
101	JB864	epsilon__For	1
101	JB758	epsilon__For	1
101	DY34373	epsilon__For	1
101	DY39827	epsilon__For	1
102	JB900_EBC131	alpha__For	2
102	JB900_EBC132	alpha__For	2
103	JB1180	alpha__Rev	2
104	JB1180	alpha__For	2
105	JB929	alpha__For	2
106	JB1180	beta__For	2
107	JB874	beta__For	2
108	JB934_EBC115	alpha__For	2
109	JB1180	alpha__Rev	2
109	JB872_EBC094	alpha__Rev	2
110	JB853_EBC085	beta__Rev	1
111	JB1110_EBC121	beta__For	2
111	JB758	alpha__Rev	1
112	JB1180	alpha__Rev	2
113	JB873	beta__For	2
113	JB873_EBC095	beta__For	2
113	JB943	alpha__For	2
113	JB842_EBC080	beta__For	2
114	JB758	alpha__For	2
115	JB872_EBC094	beta__Rev	2
115	JB874	beta__Rev	2
116	Pomberef	zeta_subalpha__For	1
116	JB22	zeta_subalpha__For	1
116	JB22_EBC2	zeta_subalpha__For	1
116	JB879	zeta_subalpha__For	1
116	JB760	zeta_subalpha__For	1
116	JB760_EBC074	zeta_subalpha__For	1
116	JB938	zeta_subalpha__For	1
116	JB869	zeta_subalpha__For	1
116	JB4_EBC069	zeta_subalpha__For	1
116	JB4	zeta_subalpha__For	1
116	JB918_EBC111	zeta_subalpha__For	1
116	JB1110_EBC121	zeta_subalpha__For	1
116	JB873	zeta_subalpha__For	1
116	JB873_EBC095	zeta_subalpha__For	1
116	JB929	zeta_subalpha__For	1
116	JB934_EBC115	zeta_subalpha__For	1
116	JB943	zeta_subalpha__For	1
116	JB900_EBC131	zeta_subalpha__For	1
116	JB900_EBC132	zeta_subalpha__For	1
116	JB854	zeta_subalpha__For	1
116	JB1180	zeta_subalpha__For	1
116	JB858_EBC087	zeta_subalpha__For	1
116	JB842_EBC080	zeta_subalpha__For	1
116	JB840	zeta_subalpha__For	1
116	JB872_EBC094	zeta_subalpha__For	1
116	JB853_EBC085	zeta_subalpha__For	1
116	JB939_EBC119	zeta_subalpha__For	1
116	JB874	beta__For	3
116	JB874	zeta_subalpha__For	1
116	JB1205_EBC137	beta__Rev	2
116	JB1205_EBC137	zeta_subalpha__For	1
116	JB1197_EBC135	zeta_subalpha__For	1
116	JB953	zeta_subalpha__For	1
116	JB837	zeta_subalpha__For	1
116	JB1206	beta__Rev	2
116	JB1206	zeta_subalpha__For	1
116	JB1206_EBC138	beta__Rev	2
116	JB1206_EBC138	zeta_subalpha__For	1
116	JB864	zeta_subalpha__For	1
116	JB758	zeta_subalpha__For	1
116	DY34373	zeta_subalpha__For	1
116	DY39827	zeta_subalpha__For	1
117	Pomberef	beta__For	1
117	JB22	beta__For	1
117	JB22_EBC2	beta__For	1
117	JB879	beta__For	1
117	JB760	beta__For	1
117	JB760_EBC074	beta__For	1
117	JB938	beta__For	1
117	JB869	beta__For	1
117	JB4_EBC069	beta__For	1
117	JB4	beta__For	1
117	JB918_EBC111	beta__For	1
117	JB1110_EBC121	beta__For	1
117	JB873	beta__For	1
117	JB873_EBC095	beta__For	1
117	JB929	beta__For	2
117	JB934_EBC115	beta__For	1
117	JB854	beta__For	1
117	JB1180	beta__For	1
117	JB872_EBC094	beta__For	1
117	JB1205_EBC137	beta__For	1
117	JB1206	beta__For	1
117	JB1206_EBC138	beta__For	1
117	JB758	beta__For	1
118	JB943	beta__For	1
119	JB1197_EBC135	alpha__Rev	2
119	DY34373	alpha__For	1
119	DY39827	alpha__For	1
120	JB872_EBC094	alpha__For	2
121	JB1180	beta__Rev	2
121	JB1197_EBC135	beta__Rev	1
122	JB943	alpha__Rev	2
122	JB943	beta__Rev	2
122	JB758	alpha__Rev	2
124	Pomberef	zeta__Rev	1
124	JB22	zeta__Rev	1
124	JB22_EBC2	zeta__Rev	1
124	JB879	zeta__Rev	1
124	JB760	zeta__Rev	1
124	JB760_EBC074	zeta__Rev	1
124	JB938	zeta__Rev	1
124	JB869	zeta__Rev	1
124	JB4_EBC069	zeta__Rev	1
124	JB4	zeta__Rev	1
124	JB918_EBC111	zeta__Rev	1
124	JB1110_EBC121	zeta__Rev	1
124	JB873	zeta__Rev	1
124	JB873_EBC095	zeta__Rev	1
124	JB929	zeta__Rev	1
124	JB934_EBC115	zeta__Rev	1
124	JB943	zeta__Rev	1
124	JB900_EBC131	zeta__Rev	1
124	JB900_EBC132	zeta__Rev	1
124	JB854	zeta__Rev	1
124	JB1180	zeta__Rev	1
124	JB858_EBC087	zeta__Rev	1
124	JB842_EBC080	zeta__Rev	1
124	JB840	zeta__Rev	1
124	JB872_EBC094	zeta__Rev	1
124	JB853_EBC085	zeta__Rev	1
124	JB939_EBC119	zeta__Rev	1
124	JB874	zeta__Rev	1
124	JB1205_EBC137	zeta__Rev	1
124	JB1197_EBC135	zeta__Rev	1
124	JB953	zeta__Rev	1
124	JB837	zeta__Rev	1
124	JB1206	zeta__Rev	1
124	JB1206_EBC138	zeta__Rev	1
124	JB864	zeta__Rev	1
124	JB758	zeta__Rev	1
124	DY34373	zeta__Rev	1
124	DY39827	zeta__Rev	1
125	Pomberef	beta_delta__For	1
125	JB22	beta_delta__For	1
125	JB22_EBC2	beta_delta__For	1
125	JB879	beta_delta__For	1
125	JB760	beta_delta__For	1
125	JB760_EBC074	beta_delta__For	1
125	JB938	beta_delta__For	1
125	JB869	beta_delta__For	1
125	JB4_EBC069	beta_delta__For	1
125	JB4	beta_delta__For	1
125	JB918_EBC111	beta_delta__For	1
125	JB1110_EBC121	beta_delta__For	1
125	JB873	beta_delta__For	1
125	JB873_EBC095	beta_delta__For	1
125	JB929	beta_delta__For	1
125	JB934_EBC115	beta_delta__For	1
125	JB943	beta_delta__For	1
125	JB900_EBC131	beta_delta__For	1
125	JB900_EBC132	beta_delta__For	1
125	JB854	beta_delta__For	1
125	JB1180	beta_delta__For	1
125	JB858_EBC087	beta_delta__For	1
125	JB842_EBC080	beta_delta__For	1
125	JB840	beta_delta__For	1
125	JB872_EBC094	beta_delta__For	1
125	JB853_EBC085	beta_delta__For	1
125	JB939_EBC119	beta_delta__For	1
125	JB874	beta_delta__For	1
125	JB1205_EBC137	beta_delta__For	1
125	JB1197_EBC135	alpha__Rev	1
125	JB1197_EBC135	beta_delta__For	1
125	JB953	beta_delta__For	1
125	JB837	beta_delta__For	1
125	JB1206	beta_delta__For	1
125	JB1206_EBC138	beta_delta__For	1
125	JB864	beta_delta__For	1
125	JB758	beta_delta__For	1
125	DY34373	beta_delta__For	1
125	DY39827	beta_delta__For	1
126	JB853_EBC085	beta__For	2
128	JB929	alpha__Rev	2
129	JB853_EBC085	beta__Rev	2
130	JB1110_EBC121	beta__For	2
131	JB918_EBC111	beta__Rev	2
131	JB1110_EBC121	beta__Rev	2
131	JB900_EBC131	beta__Rev	2
131	JB900_EBC132	beta__Rev	2
131	JB758	alpha__For	1
132	JB1180	beta__For	2
133	Pomberef	epsilon__For	1
133	JB22	epsilon__For	1
133	JB22_EBC2	epsilon__For	1
133	JB879	epsilon__For	1
133	JB760	epsilon__For	1
133	JB760_EBC074	epsilon__For	1
133	JB938	epsilon__For	1
133	JB869	epsilon__For	1
133	JB4_EBC069	epsilon__For	1
133	JB4	epsilon__For	1
133	JB918_EBC111	epsilon__For	1
133	JB1110_EBC121	epsilon__For	1
133	JB873	epsilon__For	1
133	JB873_EBC095	epsilon__For	1
133	JB929	epsilon__For	1
133	JB934_EBC115	epsilon__For	1
133	JB943	epsilon__For	1
133	JB900_EBC131	epsilon__For	1
133	JB900_EBC132	epsilon__For	1
133	JB854	epsilon__For	1
133	JB1180	epsilon__For	1
133	JB858_EBC087	epsilon__For	1
133	JB842_EBC080	epsilon__For	1
133	JB840	epsilon__For	1
133	JB872_EBC094	epsilon__For	1
133	JB853_EBC085	epsilon__For	1
133	JB939_EBC119	epsilon__For	1
133	JB874	epsilon__For	1
133	JB1205_EBC137	epsilon__For	1
133	JB1197_EBC135	epsilon__For	1
133	JB953	epsilon__For	1
133	JB837	epsilon__For	1
133	JB1206	epsilon__For	1
133	JB1206_EBC138	epsilon__For	1
133	JB864	epsilon__For	1
133	JB758	epsilon__For	1
133	DY34373	epsilon__For	1
133	DY39827	epsilon__For	1
134	Pomberef	subalpha__For	1
134	JB22	subalpha__For	1
134	JB22_EBC2	subalpha__For	1
134	JB879	subalpha__For	1
134	JB760	subalpha__For	1
134	JB760_EBC074	subalpha__For	1
134	JB938	subalpha__For	1
134	JB869	subalpha__For	1
134	JB4_EBC069	subalpha__For	1
134	JB4	subalpha__For	1
134	JB918_EBC111	subalpha__For	1
134	JB1110_EBC121	subalpha__For	1
134	JB873	subalpha__For	1
134	JB873_EBC095	subalpha__For	1
134	JB929	subalpha__For	1
134	JB934_EBC115	subalpha__For	1
134	JB943	subalpha__For	1
134	JB1180	subalpha__For	1
134	JB858_EBC087	subalpha__For	1
134	JB842_EBC080	subalpha__For	1
134	JB872_EBC094	subalpha__For	1
134	JB853_EBC085	subalpha__For	1
134	JB1197_EBC135	subalpha__For	1
135	Pomberef	beta__Rev	1
135	JB22	beta__Rev	1
135	JB22_EBC2	beta__Rev	1
135	JB879	beta__Rev	1
135	JB760	beta__Rev	1
135	JB760_EBC074	beta__Rev	1
135	JB938	beta__Rev	1
135	JB869	beta__Rev	1
135	JB4_EBC069	beta__Rev	1
135	JB4	beta__Rev	1
135	JB918_EBC111	other__Rev	1
135	JB1110_EBC121	other__Rev	1
135	JB873	other__Rev	1
135	JB873_EBC095	other__Rev	1
135	JB929	other__Rev	1
135	JB934_EBC115	other__Rev	1
135	JB943	other__Rev	1
135	JB900_EBC131	gamma__Rev	1
135	JB900_EBC132	gamma__Rev	1
135	JB854	gamma__Rev	1
135	JB1180	other__Rev	1
135	JB858_EBC087	other__Rev	1
135	JB842_EBC080	other__Rev	1
135	JB840	gamma__Rev	1
135	JB872_EBC094	other__Rev	1
135	JB853_EBC085	other__Rev	1
135	JB939_EBC119	gamma__Rev	1
135	JB874	gamma__Rev	1
135	JB1205_EBC137	gamma__Rev	1
135	JB1197_EBC135	other__Rev	1
135	JB953	gamma__Rev	1
135	JB837	gamma__Rev	1
135	JB1206	gamma__Rev	1
135	JB1206_EBC138	gamma__Rev	1
135	JB864	gamma__Rev	1
135	JB758	beta__For	1
135	JB758	gamma__Rev	1
135	DY34373	gamma__Rev	1
135	DY39827	gamma__Rev	1
136	JB842_EBC080	beta__Rev	2
136	JB853_EBC085	beta__Rev	2
137	JB943	alpha__For	2
138	JB1180	beta__For	2
139	JB1180	alpha__For	2
140	JB858_EBC087	beta__For	2
141	JB758	alpha__For	1
141	JB758	beta__Rev	1
142	JB840	beta__For	2
143	Pomberef	beta_delta__For	1
143	JB22	beta_delta__For	1
143	JB22_EBC2	beta_delta__For	1
143	JB879	beta_delta__For	1
143	JB760	beta_delta__For	1
143	JB760_EBC074	beta_delta__For	1
143	JB938	beta_delta__For	1
143	JB869	beta_delta__For	1
143	JB4_EBC069	beta_delta__For	1
143	JB4	beta_delta__For	1
143	JB918_EBC111	beta_delta__For	1
143	JB1110_EBC121	beta_delta__For	1
143	JB873	beta_delta__For	1
143	JB873_EBC095	beta_delta__For	1
143	JB929	beta_delta__For	1
143	JB934_EBC115	beta_delta__For	1
143	JB943	beta_delta__For	1
143	JB900_EBC131	beta_delta__For	1
143	JB900_EBC132	beta_delta__For	1
143	JB854	beta_delta__For	1
143	JB1180	beta_delta__For	1
143	JB858_EBC087	beta_delta__For	1
143	JB842_EBC080	beta_delta__For	1
143	JB840	beta_delta__For	1
143	JB872_EBC094	beta_delta__For	1
143	JB853_EBC085	beta_delta__For	1
143	JB939_EBC119	beta_delta__For	1
143	JB874	beta_delta__For	1
143	JB1205_EBC137	beta_delta__For	1
143	JB1197_EBC135	beta_delta__For	1
143	JB953	beta_delta__For	1
143	JB837	beta_delta__For	1
143	JB1206	beta_delta__For	1
143	JB1206_EBC138	beta_delta__For	1
143	JB864	beta_delta__For	1
143	JB758	beta_delta__For	1
143	DY34373	beta_delta__For	1
143	DY39827	beta_delta__For	1
144	JB929	alpha__Rev	3
145	JB943	alpha__Rev	2
147	JB874	beta__Rev	2
148	JB758	beta__Rev	2
149	Pomberef	subalpha__Rev	1
149	JB22	subalpha__Rev	1
149	JB22_EBC2	subalpha__Rev	1
149	JB879	subalpha__Rev	1
149	JB760	subalpha__Rev	1
149	JB760_EBC074	subalpha__Rev	1
149	JB938	subalpha__Rev	1
149	JB869	subalpha__Rev	1
149	JB4_EBC069	subalpha__Rev	1
149	JB4	subalpha__Rev	1
149	JB918_EBC111	subalpha__Rev	1
149	JB1110_EBC121	subalpha__Rev	1
149	JB873	subalpha__Rev	1
149	JB873_EBC095	subalpha__Rev	1
149	JB929	subalpha__Rev	1
149	JB934_EBC115	subalpha__Rev	1
149	JB943	subalpha__Rev	1
149	JB854	subalpha__Rev	1
149	JB1180	subalpha__Rev	1
149	JB874	subalpha__Rev	1
149	JB1205_EBC137	alpha__Rev	1
149	JB1205_EBC137	subalpha__Rev	1
149	JB837	subalpha__Rev	1
149	JB1206	alpha__Rev	1
149	JB1206	subalpha__Rev	1
149	JB1206_EBC138	alpha__Rev	1
149	JB1206_EBC138	subalpha__Rev	1
149	JB758	beta__For	1
149	JB758	subalpha__Rev	1
149	DY34373	alpha__Rev	1
149	DY34373	subalpha__Rev	1
149	DY39827	alpha__Rev	1
149	DY39827	subalpha__Rev	1
151	JB1110_EBC121	beta__Rev	2
152	JB760	beta__For	2
152	JB760_EBC074	beta__For	2
153	JB874	beta__For	2
154	JB900_EBC131	beta__Rev	2
154	JB900_EBC132	beta__Rev	2
155	JB758	alpha__For	2
156	Pomberef	epsilon__Rev	1
156	JB22	epsilon__Rev	1
156	JB22_EBC2	epsilon__Rev	1
156	JB879	epsilon__Rev	1
156	JB760	epsilon__Rev	1
156	JB760_EBC074	epsilon__Rev	1
156	JB938	epsilon__Rev	1
156	JB869	epsilon__Rev	1
156	JB4_EBC069	epsilon__Rev	1
156	JB4	epsilon__Rev	1
156	JB918_EBC111	epsilon__Rev	1
156	JB1110_EBC121	epsilon__Rev	1
156	JB873	epsilon__Rev	1
156	JB873_EBC095	epsilon__Rev	1
156	JB929	epsilon__Rev	1
156	JB934_EBC115	epsilon__Rev	1
156	JB943	epsilon__Rev	1
156	JB900_EBC131	epsilon__Rev	1
156	JB900_EBC132	epsilon__Rev	1
156	JB854	epsilon__Rev	1
156	JB1180	epsilon__Rev	1
156	JB858_EBC087	epsilon__Rev	1
156	JB842_EBC080	epsilon__Rev	1
156	JB840	epsilon__Rev	1
156	JB872_EBC094	epsilon__Rev	1
156	JB853_EBC085	epsilon__Rev	1
156	JB939_EBC119	epsilon__Rev	1
156	JB874	epsilon__Rev	1
156	JB1205_EBC137	epsilon__Rev	1
156	JB1197_EBC135	epsilon__Rev	1
156	JB953	epsilon__Rev	1
156	JB837	epsilon__Rev	1
156	JB1206	epsilon__Rev	1
156	JB1206_EBC138	epsilon__Rev	1
156	JB864	epsilon__Rev	1
156	JB758	epsilon__Rev	1
156	DY34373	epsilon__Rev	1
156	DY39827	epsilon__Rev	1
157	Pomberef	beta__For	1
157	JB22	beta__For	1
157	JB22_EBC2	beta__For	1
157	JB879	beta__For	1
157	JB760	beta__For	1
157	JB760_EBC074	beta__For	1
157	JB938	beta__For	1
157	JB869	beta__For	1
157	JB4_EBC069	beta__For	1
157	JB4	beta__For	1
157	JB918_EBC111	beta__For	1
157	JB1110_EBC121	beta__For	1
157	JB873	beta__For	1
157	JB873_EBC095	beta__For	1
157	JB929	beta__For	1
157	JB934_EBC115	beta__For	1
157	JB943	beta__For	1
157	JB900_EBC131	beta__For	1
157	JB900_EBC132	beta__For	1
157	JB854	beta__For	1
157	JB1180	beta__For	1
157	JB858_EBC087	beta__For	1
157	JB842_EBC080	beta__For	1
157	JB840	beta__For	1
157	JB872_EBC094	beta__For	1
157	JB874	beta__For	1
157	JB1197_EBC135	beta__For	1
157	JB864	beta__For	1
158	JB758	beta__Rev	1
159	JB900_EBC131	alpha__Rev	1
159	JB900_EBC131	beta__Rev	1
159	JB900_EBC132	alpha__Rev	1
159	JB900_EBC132	beta__Rev	1
160	Pomberef	beta__Rev	2
160	JB22	beta__Rev	2
160	JB22_EBC2	beta__Rev	1
160	JB760	beta__Rev	2
160	JB760_EBC074	beta__Rev	2
160	JB943	alpha__For	2
160	JB943	beta__Rev	2
161	JB918_EBC111	alpha__For	2
161	JB900_EBC131	beta__Rev	2
161	JB900_EBC132	beta__Rev	2
162	JB873	beta__For	2
162	JB873_EBC095	beta__For	2
162	JB929	beta__For	2
162	JB872_EBC094	beta__For	2
163	Pomberef	beta__Rev	2
163	JB22	beta__Rev	2
163	JB22_EBC2	beta__Rev	2
163	JB879	beta__Rev	2
163	JB760	beta__Rev	1
163	JB760_EBC074	beta__Rev	1
163	JB938	beta__Rev	2
163	JB869	beta__Rev	2
163	JB918_EBC111	beta__Rev	2
163	JB1110_EBC121	beta__Rev	1
163	JB934_EBC115	beta__Rev	2
163	JB943	beta__Rev	2
163	JB854	beta__Rev	2
163	JB840	beta__Rev	2
164	JB837	beta__Rev	2
165	JB918_EBC111	alpha__For	1
165	JB918_EBC111	beta__For	1
166	JB1180	beta__For	2
166	JB1180	beta__Rev	2
167	JB842_EBC080	beta__Rev	3
168	JB873	alpha__Rev	1
168	JB873	subiota__Rev	1
168	JB873_EBC095	alpha__Rev	2
169	JB918_EBC111	alpha__For	1
170	JB853_EBC085	beta__Rev	2
171	JB837	alpha__Rev	2
172	JB900_EBC131	alpha__For	2
172	JB900_EBC132	alpha__For	2
173	JB929	alpha__For	2
173	JB758	beta__Rev	2
174	Pomberef	subalpha__Rev	1
174	JB22	subalpha__Rev	1
174	JB22_EBC2	subalpha__Rev	1
174	JB879	subalpha__Rev	1
174	JB760	subalpha__Rev	1
174	JB760_EBC074	subalpha__Rev	1
174	JB938	subalpha__Rev	1
174	JB869	subalpha__Rev	1
174	JB4_EBC069	subalpha__Rev	1
174	JB4	subalpha__Rev	1
174	JB918_EBC111	subalpha__Rev	1
174	JB1110_EBC121	subalpha__Rev	1
174	JB873	subalpha__Rev	1
174	JB873_EBC095	subalpha__Rev	1
174	JB929	subalpha__Rev	1
174	JB934_EBC115	subalpha__Rev	1
174	JB943	subalpha__Rev	1
174	JB900_EBC131	subalpha__Rev	1
174	JB900_EBC132	subalpha__Rev	1
174	JB854	subalpha__Rev	1
174	JB858_EBC087	subalpha__Rev	1
174	JB842_EBC080	subalpha__Rev	1
174	JB840	subalpha__Rev	1
174	JB872_EBC094	subalpha__Rev	1
174	JB853_EBC085	subalpha__Rev	1
174	JB874	subalpha__Rev	1
174	JB837	subalpha__Rev	1
175	Pomberef	subiota__For	1
175	JB22	subiota__For	1
175	JB22_EBC2	subiota__For	1
175	JB879	subiota__For	1
175	JB760	subiota__For	1
175	JB760_EBC074	subiota__For	1
175	JB938	subiota__For	1
175	JB869	subiota__For	1
175	JB4_EBC069	subiota__For	1
175	JB4	subiota__For	1
175	JB918_EBC111	subiota__For	1
175	JB1110_EBC121	subiota__For	1
175	JB873	subiota__For	1
175	JB873_EBC095	subiota__For	1
175	JB929	subiota__For	1
175	JB934_EBC115	subiota__For	1
175	JB943	subiota__For	1
175	JB900_EBC131	subiota__For	1
175	JB900_EBC132	subiota__For	1
175	JB854	subiota__For	1
175	JB1180	subiota__For	1
175	JB858_EBC087	subiota__For	1
175	JB842_EBC080	subiota__For	1
175	JB840	subiota__For	1
175	JB872_EBC094	subiota__For	1
175	JB853_EBC085	subiota__For	1
175	JB939_EBC119	subiota__For	1
175	JB874	subiota__For	1
175	JB1205_EBC137	subiota__For	1
175	JB1197_EBC135	subiota__For	1
175	JB953	subiota__For	1
175	JB837	subiota__For	1
175	JB1206	subiota__For	1
175	JB1206_EBC138	subiota__For	1
175	JB864	subiota__For	1
175	JB758	subiota__For	1
175	DY34373	subiota__For	1
175	DY39827	subiota__For	1
176	JB758	alpha__Rev	1
176	JB758	beta__For	1
177	Pomberef	epsilon__For	1
177	JB22	epsilon__For	1
177	JB22_EBC2	epsilon__For	1
177	JB879	epsilon__For	1
177	JB760	epsilon__For	1
177	JB760_EBC074	epsilon__For	1
177	JB938	epsilon__For	1
177	JB869	epsilon__For	1
177	JB4_EBC069	epsilon__For	1
177	JB4	epsilon__For	1
177	JB918_EBC111	epsilon__For	1
177	JB1110_EBC121	epsilon__For	1
177	JB873	epsilon__For	1
177	JB873_EBC095	epsilon__For	1
177	JB929	epsilon__For	1
177	JB934_EBC115	epsilon__For	1
177	JB943	epsilon__For	1
177	JB900_EBC131	epsilon__For	1
177	JB900_EBC132	epsilon__For	1
177	JB854	epsilon__For	1
177	JB1180	epsilon__For	1
177	JB858_EBC087	epsilon__For	1
177	JB842_EBC080	epsilon__For	1
177	JB840	epsilon__For	1
177	JB872_EBC094	epsilon__For	1
177	JB853_EBC085	epsilon__For	1
177	JB939_EBC119	epsilon__For	1
177	JB874	epsilon__For	1
177	JB1205_EBC137	epsilon__For	1
177	JB1197_EBC135	epsilon__For	1
177	JB953	epsilon__For	1
177	JB837	epsilon__For	1
177	JB1206	epsilon__For	1
177	JB1206_EBC138	epsilon__For	1
177	JB864	epsilon__For	1
177	JB758	epsilon__For	1
177	DY34373	epsilon__For	1
177	DY39827	epsilon__For	1
178	JB858_EBC087	beta__Rev	2
178	JB842_EBC080	beta__Rev	2
179	JB758	beta__Rev	1
180	Pomberef	subalpha__For	1
180	JB22	subalpha__For	1
180	JB22_EBC2	subalpha__For	1
180	JB879	subalpha__For	1
180	JB760	subalpha__For	1
180	JB760_EBC074	subalpha__For	1
180	JB938	subalpha__For	1
180	JB869	subalpha__For	1
180	JB918_EBC111	subalpha__For	1
180	JB1110_EBC121	subalpha__For	1
180	JB873	subalpha__For	1
180	JB873_EBC095	subalpha__For	1
180	JB929	subalpha__For	1
180	JB934_EBC115	subalpha__For	1
180	JB943	subalpha__For	1
180	JB854	subalpha__For	1
180	JB840	subalpha__For	1
181	JB900_EBC131	alpha__For	2
181	JB900_EBC132	alpha__For	2
181	JB853_EBC085	beta__Rev	1
182	JB900_EBC131	alpha__For	2
182	JB900_EBC132	alpha__For	2
184	Pomberef	subiota__For	1
184	JB22	subiota__For	1
184	JB22_EBC2	subiota__For	1
184	JB879	subiota__For	1
184	JB760	subiota__For	1
184	JB760_EBC074	subiota__For	1
184	JB938	subiota__For	1
184	JB869	subiota__For	1
184	JB4_EBC069	subiota__For	1
184	JB4	subiota__For	1
184	JB918_EBC111	subiota__For	1
184	JB1110_EBC121	subiota__For	1
184	JB873	subiota__For	1
184	JB873_EBC095	subiota__For	1
184	JB929	beta__Rev	3
184	JB929	gamma_iota__Rev	2
184	JB934_EBC115	subiota__For	1
184	JB943	subiota__For	1
184	JB900_EBC131	subiota__For	1
184	JB900_EBC132	subiota__For	1
184	JB854	subiota__For	1
184	JB1180	subiota__For	1
184	JB858_EBC087	subiota__For	1
184	JB842_EBC080	subiota__For	1
184	JB840	subiota__For	1
184	JB872_EBC094	subiota__For	1
184	JB853_EBC085	subiota__For	1
184	JB939_EBC119	subiota__For	1
184	JB874	subiota__For	1
184	JB1205_EBC137	subiota__For	1
184	JB1197_EBC135	subiota__For	1
184	JB953	subiota__For	1
184	JB837	subiota__For	1
184	JB1206	subiota__For	1
184	JB1206_EBC138	subiota__For	1
184	JB864	subiota__For	1
184	JB758	alpha__For	1
184	JB758	beta__For	1
184	DY34373	subiota__For	1
184	DY39827	subiota__For	1
185	JB758	alpha__Rev	2
186	JB758	alpha__For	2
186	JB758	beta__For	2
187	JB943	alpha__For	5
187	JB900_EBC131	alpha__Rev	2
187	JB900_EBC132	alpha__Rev	2
187	JB1180	beta__Rev	2
188	Pomberef	subalpha__For	1
188	JB22	subalpha__For	1
188	JB22_EBC2	subalpha__For	1
188	JB879	subalpha__For	1
188	JB760	subalpha__For	1
188	JB760_EBC074	subalpha__For	1
188	JB938	subalpha__For	1
188	JB869	subalpha__For	1
188	JB4_EBC069	subalpha__For	1
188	JB4	subalpha__For	1
188	JB918_EBC111	alpha__Rev	2
188	JB873	subalpha__For	1
188	JB873_EBC095	subalpha__For	1
188	JB934_EBC115	subalpha__For	1
188	JB1180	alpha__For	3
188	JB758	alpha__Rev	1
190	Pomberef	beta__Rev	2
190	JB22	beta__Rev	2
190	JB22_EBC2	beta__Rev	2
190	JB758	alpha__For	1
191	JB1180	alpha__Rev	5
194	Pomberef	zeta__For	1
194	JB22	zeta__For	1
194	JB22_EBC2	zeta__For	1
194	JB879	zeta__For	1
194	JB760	zeta__For	1
194	JB760_EBC074	zeta__For	1
194	JB938	zeta__For	1
194	JB869	zeta__For	1
194	JB4_EBC069	zeta__For	1
194	JB4	zeta__For	1
194	JB918_EBC111	zeta__For	1
194	JB1110_EBC121	zeta__For	1
194	JB873	zeta__For	1
194	JB873_EBC095	zeta__For	1
194	JB929	zeta__For	1
194	JB934_EBC115	zeta__For	1
194	JB943	alpha__For	2
194	JB900_EBC131	alpha__For	2
194	JB900_EBC132	alpha__For	2
194	JB854	zeta__For	1
194	JB1180	zeta__For	1
194	JB858_EBC087	zeta__For	1
194	JB842_EBC080	zeta__For	1
194	JB840	zeta__For	1
194	JB872_EBC094	zeta__For	1
194	JB853_EBC085	zeta__For	1
194	JB939_EBC119	zeta__For	1
194	JB874	zeta__For	1
194	JB1205_EBC137	zeta__For	1
194	JB1197_EBC135	zeta__For	1
194	JB953	zeta__For	1
194	JB837	zeta__For	1
194	JB1206	zeta__For	1
194	JB1206_EBC138	zeta__For	1
194	JB864	zeta__For	1
194	JB758	zeta__For	1
194	DY34373	zeta__For	1
194	DY39827	zeta__For	1
195	JB758	beta__Rev	1
196	Pomberef	epsilon__Rev	1
196	JB22	epsilon__Rev	1
196	JB22_EBC2	epsilon__Rev	1
196	JB879	epsilon__Rev	1
196	JB760	epsilon__Rev	1
196	JB760_EBC074	epsilon__Rev	1
196	JB938	epsilon__Rev	1
196	JB869	epsilon__Rev	1
196	JB4_EBC069	epsilon__Rev	1
196	JB4	epsilon__Rev	1
196	JB918_EBC111	epsilon__Rev	1
196	JB1110_EBC121	epsilon__Rev	1
196	JB873	epsilon__Rev	1
196	JB873_EBC095	epsilon__Rev	1
196	JB929	epsilon__Rev	1
196	JB934_EBC115	epsilon__Rev	1
196	JB943	epsilon__Rev	1
196	JB900_EBC131	epsilon__Rev	1
196	JB900_EBC132	epsilon__Rev	1
196	JB854	epsilon__Rev	1
196	JB1180	epsilon__Rev	1
196	JB858_EBC087	epsilon__Rev	1
196	JB842_EBC080	epsilon__Rev	1
196	JB840	epsilon__Rev	1
196	JB872_EBC094	epsilon__Rev	1
196	JB853_EBC085	epsilon__Rev	1
196	JB939_EBC119	epsilon__Rev	1
196	JB874	epsilon__Rev	1
196	JB1205_EBC137	epsilon__Rev	1
196	JB1197_EBC135	epsilon__Rev	1
196	JB953	epsilon__Rev	1
196	JB837	epsilon__Rev	1
196	JB1206	epsilon__Rev	1
196	JB1206_EBC138	epsilon__Rev	1
196	JB864	epsilon__Rev	1
196	JB758	epsilon__Rev	1
196	DY34373	epsilon__Rev	1
196	DY39827	epsilon__Rev	1
197	JB1197_EBC135	alpha__Rev	2
200	JB758	beta__Rev	1
202	JB853_EBC085	beta__For	2
203	JB873	alpha__Rev	1
203	JB873_EBC095	alpha__Rev	1
203	JB874	alpha__Rev	1
203	JB758	beta__For	2
204	JB873	alpha__For	1
204	JB873_EBC095	alpha__For	1
204	JB874	alpha__For	1
205	JB760	beta__For	1
205	JB760	beta__Rev	1
205	JB760_EBC074	beta__For	2
205	JB872_EBC094	alpha__For	2
206	JB1180	alpha__Rev	2
207	JB758	alpha__For	2
208	JB1205_EBC137	alpha__Rev	2
209	JB1206	alpha__Rev	2
209	JB1206_EBC138	alpha__Rev	2
210	JB918_EBC111	alpha__For	2
211	JB1110_EBC121	alpha__Rev	2
212	JB943	alpha__For	2
213	JB918_EBC111	beta__Rev	2
214	JB853_EBC085	beta__Rev	1
215	JB858_EBC087	beta__For	2
215	JB842_EBC080	beta__For	2
216	Pomberef	other__For	1
216	JB22	other__For	1
216	JB22_EBC2	other__For	1
216	JB879	other__For	1
216	JB760	other__For	1
216	JB760_EBC074	other__For	1
216	JB938	other__For	1
216	JB869	other__For	1
216	JB4_EBC069	other__For	1
216	JB4	other__For	1
216	JB918_EBC111	other__For	1
216	JB1110_EBC121	other__For	1
216	JB873	other__For	1
216	JB873_EBC095	other__For	1
216	JB929	other__For	1
216	JB934_EBC115	other__For	1
216	JB943	other__For	1
216	JB900_EBC131	other__For	1
216	JB900_EBC132	other__For	1
216	JB854	other__For	1
216	JB1180	other__For	1
216	JB858_EBC087	other__For	1
216	JB842_EBC080	other__For	1
216	JB840	other__For	1
216	JB872_EBC094	other__For	1
216	JB853_EBC085	other__For	1
216	JB939_EBC119	other__For	1
216	JB874	other__For	1
216	JB1205_EBC137	other__For	1
216	JB1197_EBC135	other__For	1
216	JB953	other__For	1
216	JB837	other__For	1
216	JB1206	other__For	1
216	JB1206_EBC138	other__For	1
216	JB864	other__For	1
216	JB758	alpha__Rev	1
216	JB758	other__For	1
216	DY34373	other__For	1
216	DY39827	other__For	1
217	JB858_EBC087	beta__Rev	2
217	JB842_EBC080	beta__Rev	2
218	JB4_EBC069	beta__For	1
218	JB4	beta__For	1
218	JB918_EBC111	beta__For	1
218	JB1110_EBC121	beta__For	1
218	JB929	beta__For	1
218	JB943	beta__For	1
218	JB1180	beta__For	1
218	JB874	alpha__Rev	2
218	JB874	beta__For	1
218	JB1197_EBC135	beta__For	1
219	JB943	alpha__For	2
220	Pomberef	beta__Rev	2
220	Pomberef	zeta__For	1
220	JB22	beta__For	2
220	JB22	gamma_iota__Rev	2
220	JB22_EBC2	beta__Rev	1
220	JB22_EBC2	other__Rev	1
220	JB22_EBC2	zeta__For	1
220	JB879	beta__For	1
220	JB879	gamma_iota__Rev	2
220	JB879	other__For	1
220	JB760	other__Rev	1
220	JB760	zeta__For	1
220	JB760_EBC074	other__Rev	1
220	JB760_EBC074	zeta__For	1
220	JB938	beta__Rev	2
220	JB938	zeta__For	1
220	JB869	other__Rev	1
220	JB869	zeta__For	1
220	JB4_EBC069	other__Rev	1
220	JB4_EBC069	zeta__For	1
220	JB4	other__Rev	1
220	JB4	zeta__For	1
220	JB918_EBC111	other__Rev	1
220	JB918_EBC111	zeta__For	1
220	JB1110_EBC121	alpha__For	2
220	JB1110_EBC121	other__Rev	1
220	JB1110_EBC121	zeta__For	1
220	JB873	other__Rev	1
220	JB873	zeta__For	2
220	JB873_EBC095	other__Rev	1
220	JB873_EBC095	zeta__For	1
220	JB929	alpha__For	1
220	JB929	other__Rev	1
220	JB929	zeta__For	1
220	JB934_EBC115	other__Rev	1
220	JB934_EBC115	zeta__For	1
220	JB943	other__Rev	1
220	JB943	zeta__For	1
220	JB900_EBC131	other__Rev	1
220	JB900_EBC131	zeta__For	1
220	JB900_EBC132	other__Rev	1
220	JB900_EBC132	zeta__For	1
220	JB854	other__Rev	1
220	JB854	zeta__For	1
220	JB1180	other__Rev	1
220	JB1180	zeta__For	1
220	JB858_EBC087	beta__For	4
220	JB858_EBC087	beta__Rev	4
220	JB858_EBC087	zeta__For	1
220	JB842_EBC080	beta__For	5
220	JB842_EBC080	beta__Rev	5
220	JB842_EBC080	zeta__For	1
220	JB840	other__Rev	1
220	JB840	zeta__For	1
220	JB872_EBC094	alpha__For	2
220	JB872_EBC094	beta__Rev	2
220	JB853_EBC085	zeta__For	1
220	JB939_EBC119	zeta__For	1
220	JB874	other__Rev	1
220	JB874	zeta__For	1
220	JB1205_EBC137	zeta__For	1
220	JB1197_EBC135	alpha__Rev	1
220	JB1197_EBC135	beta__Rev	1
220	JB1197_EBC135	other__Rev	1
220	JB1197_EBC135	zeta__For	1
220	JB953	other__Rev	1
220	JB953	zeta__For	1
220	JB837	other__Rev	1
220	JB837	zeta__For	1
220	JB1206	zeta__For	1
220	JB1206_EBC138	zeta__For	1
220	JB864	zeta__Rev	2
220	JB758	other__Rev	1
220	JB758	zeta__For	1
220	DY34373	zeta__For	1
220	DY39827	zeta__For	1
221	JB872_EBC094	alpha__Rev	1
221	JB939_EBC119	alpha__Rev	1
221	JB953	alpha__For	2
221	JB864	alpha__Rev	1
221	JB758	alpha__Rev	1
222	Pomberef	beta__For	2
222	JB22_EBC2	beta__For	2
222	JB760	beta__For	2
222	JB760_EBC074	beta__For	2
222	JB938	beta__For	2
223	JB872_EBC094	alpha__For	1
223	JB872_EBC094	alpha__Rev	2
223	JB872_EBC094	beta__For	2
223	JB872_EBC094	beta__Rev	2
224	JB1197_EBC135	alpha__For	2
225	JB1180	alpha__Rev	2
227	JB842_EBC080	alpha__Rev	2
228	JB758	alpha__Rev	2
229	JB872_EBC094	alpha__Rev	2
230	Pomberef	subalpha__Rev	1
230	JB22	subalpha__Rev	1
230	JB22_EBC2	subalpha__Rev	1
230	JB879	subalpha__Rev	1
230	JB760	subalpha__For	1
230	JB760	subalpha__Rev	1
230	JB760_EBC074	subalpha__Rev	1
230	JB938	subalpha__Rev	1
230	JB869	subalpha__Rev	1
230	JB4_EBC069	subalpha__Rev	1
230	JB4	subalpha__Rev	1
230	JB918_EBC111	subalpha__Rev	1
230	JB1110_EBC121	subalpha__Rev	1
230	JB873	subalpha__Rev	1
230	JB873_EBC095	subalpha__Rev	1
230	JB929	subalpha__Rev	1
230	JB934_EBC115	subalpha__Rev	1
230	JB943	subalpha__Rev	1
230	JB854	subalpha__Rev	1
230	JB1180	subalpha__Rev	1
230	JB858_EBC087	subalpha__Rev	1
230	JB842_EBC080	subalpha__Rev	1
230	JB840	subalpha__Rev	1
230	JB872_EBC094	subalpha__Rev	1
230	JB853_EBC085	subalpha__Rev	1
230	JB1197_EBC135	alpha__Rev	4
230	JB1197_EBC135	subalpha__Rev	1
231	JB1180	alpha__Rev	2
233	JB1197_EBC135	alpha__Rev	2
234	JB840	beta__Rev	2
235	JB758	beta__Rev	1
236	Pomberef	gamma__For	1
236	JB22	gamma__For	1
236	JB22_EBC2	gamma__For	1
236	JB879	gamma__For	1
236	JB760	beta__For	1
236	JB760	beta__Rev	2
236	JB760	gamma__Rev	1
236	JB760_EBC074	beta__Rev	3
236	JB760_EBC074	gamma__For	1
236	JB938	gamma__For	1
236	JB869	gamma__For	1
236	JB4_EBC069	gamma__For	1
236	JB4	gamma__For	1
236	JB918_EBC111	beta__For	2
236	JB918_EBC111	beta__Rev	1
236	JB918_EBC111	gamma__Rev	1
236	JB1110_EBC121	gamma__For	1
236	JB873	gamma__For	1
236	JB873_EBC095	gamma__For	1
236	JB929	gamma__For	1
236	JB934_EBC115	gamma__For	1
236	JB943	gamma__For	1
236	JB900_EBC131	gamma__For	1
236	JB900_EBC132	gamma__For	1
236	JB854	gamma__For	1
236	JB1180	gamma__For	1
236	JB858_EBC087	gamma__For	1
236	JB842_EBC080	gamma__For	1
236	JB840	gamma__For	1
236	JB872_EBC094	gamma__For	1
236	JB853_EBC085	gamma__For	1
236	JB939_EBC119	gamma__For	1
236	JB874	gamma__For	1
236	JB1205_EBC137	gamma__For	1
236	JB1197_EBC135	gamma__For	1
236	JB953	gamma__For	1
236	JB837	gamma__For	1
236	JB1206	gamma__For	1
236	JB1206_EBC138	gamma__For	1
236	JB864	gamma__For	1
236	JB758	gamma__For	1
236	DY34373	gamma__For	1
236	DY39827	gamma__For	1
237	Pomberef	other__For	1
237	JB22	other__For	1
[truncated: 5,673 more rows]
